# Supplementary material for: Drought tolerance of the grapevine, Vitis champinii cv. Ramsey, is associated with higher photosynthesis and greater transcriptomic responsiveness of abscisic acid biosynthesis and signaling
Source: BMC Plant Biol. 2020 Feb 4;20:55. doi: 10.1186/s12870-019-2012-7 (PMC7001288; doi:10.1186/s12870-019-2012-7)
Supplement: Supplementary file 13 — Gene module membership in the root samples. (XLSX 45939 kb) [file 12870_2019_2012_MOESM13_ESM.xlsx]

## Sheet: Additional_file_13
Additional file 13: Gene module membership in the root samples. For each gene (rows), the kME and p-values are presented for each module (columns). The last columns contain annotation information for each gene.
IDENTIFIER	MMorangered4	MMskyblue	MMblack	MMthistle1	MMdarkred	MMivory	MMorange	MMpalevioletred3	MMgrey60	MMmidnightblue	MMdarkgreen	MMfloralwhite	MMthistle2	MMgreen	MMpink	MMlightyellow	MMdarkturquoise	MMroyalblue	MMviolet	MMmediumpurple3	MMskyblue3	MMdarkslateblue	MMlightcyan	MMlightcyan1	MMlightpink4	MMyellowgreen	MMdarkorange2	MMpaleturquoise	MMbrown4	MMplum1	MMlightsteelblue1	MMtan	MMbisque4	MMplum2	MMcyan	MMdarkorange	MMsalmon	MMyellow	MMmagenta	MMblue	MMturquoise	MMdarkolivegreen	MMlightgreen	MMsalmon4	MMbrown	MMdarkmagenta	MMmaroon	MMsienna3	MMwhite
VIT_00s0120g00010	0.344482	0.0913267	-0.0381504	-0.0986762	0.370892	0.140079	0.0648028	0.142177	0.206999	0.0336474	0.261976	0.330698	0.143191	0.490516	0.148908	0.231851	0.247304	0.19147	-0.131383	-0.281497	-0.0657201	-0.226113	-0.123397	-0.224843	0.0978766	-0.129941	0.438012	0.0105202	0.0143166	-0.0549684	-0.0110846	0.0737054	-0.482015	-0.389134	-0.302968	-0.294479	-0.129926	-0.247666	-0.183422	-0.139552	-0.331077	0.28885	0.259933	0.0399207	0.101541	-0.030982	-0.312299	-0.133817	0.417682
VIT_00s0120g00020	0.356717	0.225053	0.501828	0.209752	0.404051	0.43213	0.520357	0.456843	0.499327	0.401262	0.775998	0.866196	0.564405	0.756147	0.393268	0.666602	0.624644	0.61776	0.0163205	0.161996	0.445269	0.0293569	0.214665	-0.186303	0.26832	-0.258428	0.146856	0.0489854	0.0731811	-0.102089	-0.480107	-0.149971	-0.43161	-0.317888	-0.606186	-0.238654	-0.362403	-0.539973	-0.505421	-0.663633	-0.668652	0.113804	0.474079	0.700077	0.299335	0.444743	-0.436724	-0.0117361	0.206077
VIT_00s0125g00020	-0.0671798	-0.0122888	0.581	0.33208	-0.015866	0.403565	0.469717	0.462594	0.385385	0.644242	0.532388	0.366601	0.246983	0.112717	0.324641	0.437449	0.230758	0.34711	0.251717	0.912216	0.587253	0.495166	0.390339	0.246232	0.116916	0.1623	-0.140292	0.228582	0.446448	0.222829	-0.522349	-0.351446	0.228056	-0.0366544	-0.110435	0.104125	-0.445225	-0.475922	-0.222891	-0.573817	-0.282595	-0.569355	-0.254854	0.397972	-0.160407	0.22654	-0.231889	0.0307214	-0.445658
VIT_00s0125g00030	-0.384314	-0.0581608	0.335271	0.0762751	-0.223973	0.310573	0.202504	0.16782	0.0312668	0.392776	0.35457	0.18599	-0.0330948	-0.205617	0.00961673	0.148849	-0.00717252	0.144072	0.482741	0.928591	0.524305	0.529753	0.513926	0.212677	0.163591	0.158239	-0.196052	0.16918	0.387907	0.406262	-0.425442	-0.23608	0.337999	0.107832	0.222363	0.445803	-0.139435	-0.167735	-0.0535003	-0.334487	0.030353	-0.508805	-0.176024	0.443888	0.0600024	0.41279	-0.00033343	0.129889	-0.64799
VIT_00s0125g00060	-0.199895	-0.0214317	0.394837	0.178112	-0.149885	0.297793	0.3113	0.333221	0.167429	0.515146	0.411578	0.241931	0.121651	-0.0615941	0.178802	0.252387	0.0752611	0.206958	0.246283	0.933992	0.538286	0.478532	0.376808	0.216906	0.0559148	0.103502	-0.0753479	0.248264	0.507731	0.427796	-0.470552	-0.339608	0.271635	0.00184678	0.0818361	0.215467	-0.287183	-0.299578	-0.111715	-0.41954	-0.10187	-0.538383	-0.219658	0.365795	-0.109354	0.232969	-0.145238	0.0732835	-0.583834
VIT_00s0125g00070	-0.121015	-0.0154965	0.577474	0.391938	-0.171327	0.259199	0.371257	0.336813	0.27877	0.541908	0.42586	0.290231	0.19103	0.0125834	0.231893	0.309552	0.156909	0.249839	0.19488	0.925168	0.518018	0.430563	0.34298	0.196223	0.0614476	0.0904041	-0.166233	0.318781	0.431244	0.266087	-0.43873	-0.322742	0.350731	0.147748	-0.0526913	0.146724	-0.309945	-0.344602	-0.133802	-0.487039	-0.146172	-0.515169	-0.204263	0.426651	-0.117597	0.228637	-0.167842	0.0137438	-0.520911
VIT_00s0125g00080	0.117854	0.113614	0.408669	0.310367	0.119962	0.427541	0.381093	0.440438	0.22902	0.502802	0.375805	0.288349	0.183587	0.127085	0.365019	0.345165	0.200839	0.334992	0.293521	0.783721	0.524318	0.311349	0.152036	0.111798	-0.130504	-0.0394242	-0.0533026	0.178298	0.500928	0.120155	-0.51517	-0.457323	-0.0240904	-0.153174	-0.0965077	-0.0432671	-0.386511	-0.351856	-0.237883	-0.415316	-0.243172	-0.405468	-0.12908	0.246576	-0.252408	0.0188576	-0.182486	-0.0315368	-0.242645
VIT_00s0125g00090	0.482716	-0.0927096	0.164039	0.178176	0.606133	0.36034	0.469722	0.591172	0.567411	0.29012	0.204319	0.198589	0.318856	0.448561	0.427338	0.433368	0.236592	0.259965	-0.106098	-0.178309	0.214537	0.031476	-0.167098	0.158912	-0.207806	-0.12129	0.0420219	-0.20366	0.0230491	-0.406291	-0.30821	-0.280149	-0.325361	-0.434481	-0.369274	-0.457984	-0.467317	-0.540559	-0.127978	-0.237863	-0.461715	-0.0319973	0.0339416	-0.102398	-0.287993	-0.250047	-0.511704	-0.156005	0.547704
VIT_00s0125g00140	-0.465325	-0.416971	0.031449	-0.241551	0.103961	0.381245	0.0606171	0.265105	0.116055	0.297317	0.204514	-0.106804	-0.0288038	-0.339405	-0.0703622	0.0412629	-0.270894	-0.0397024	0.50648	0.335537	0.617642	0.783751	0.662812	0.384469	0.174997	0.414991	-0.187011	-0.173204	0.105112	0.0291933	-0.464651	-0.21063	0.214616	-0.170652	0.43023	0.562401	-0.301763	-0.316965	0.149991	-0.10515	0.0791463	-0.601192	-0.351174	0.0986464	-0.0514971	0.341457	-0.0165007	0.0895533	-0.182956
VIT_00s0125g00170	-0.158818	-0.0799229	-0.0462999	-0.481054	0.501702	0.458946	0.0838099	0.0340706	0.223557	0.100262	0.448965	0.392901	0.195348	0.325521	-0.0688693	0.288651	0.202881	0.194033	0.385356	0.0248966	0.0823541	0.166823	0.452036	0.0194063	0.644508	0.312371	-0.0683889	-0.473889	-0.343534	-0.128869	-0.0170114	0.380797	-0.376647	-0.536595	-0.0986602	0.220575	-0.125519	-0.281986	-0.145078	-0.216795	-0.319123	0.113593	0.148602	0.191277	0.462833	0.533724	-0.140184	0.176263	0.269418
VIT_00s0125g00180	-0.415419	-0.00164684	-0.106795	-0.0996578	-0.406877	-0.275693	-0.316226	-0.533899	-0.334209	-0.250237	-0.317423	-0.290484	-0.324193	-0.369175	-0.368571	-0.286212	-0.189098	-0.281469	0.0275538	0.0454522	-0.432566	-0.129957	0.0540463	0.102946	0.253856	0.275077	-0.299999	0.0477394	-0.183291	0.190191	0.560269	0.474152	0.450797	0.417978	0.253016	0.319705	0.431149	0.492494	0.221263	0.250326	0.392328	0.0672644	-0.199576	-0.0702784	0.174408	0.0907837	0.43864	0.104973	-0.370892
VIT_00s0125g00190	0.423564	0.367544	0.0776765	-0.0479345	0.726555	0.68431	0.301577	0.503119	0.389353	0.36151	0.326675	0.383155	0.242705	0.432847	0.537373	0.509508	0.46012	0.560622	0.389642	0.108772	0.417573	0.163867	-0.0180424	-0.186483	-0.135283	-0.096382	-0.234659	-0.574948	0.0118144	-0.439339	-0.540604	-0.416685	-0.614807	-0.66521	-0.349713	-0.261849	-0.503382	-0.33331	-0.5474	-0.387709	-0.586697	-0.117035	0.0386428	-0.105679	-0.248992	-0.120373	-0.131522	0.145871	0.422829
VIT_00s0125g00200	-0.181513	0.100672	-0.354723	-0.00947435	-0.640176	-0.675444	-0.518682	-0.61629	-0.622803	-0.487526	-0.584561	-0.499486	-0.453749	-0.476076	-0.40254	-0.619152	-0.370758	-0.457098	-0.318011	-0.170657	-0.537118	-0.370022	-0.332354	-0.194199	-0.233312	-0.0651415	0.138516	0.357661	0.0724332	0.321759	0.504926	0.207984	0.233155	0.513655	0.339354	0.102651	0.569591	0.692843	0.287641	0.551275	0.619246	0.211712	-0.0404802	-0.278986	0.0134375	-0.256836	0.371983	-0.0404527	-0.298552
VIT_00s0125g00210	0.663975	0.344853	0.234606	0.264406	0.586135	0.507593	0.576499	0.69783	0.453342	0.434063	0.363358	0.456331	0.342935	0.582796	0.667736	0.583948	0.493174	0.564849	-0.0302108	0.0827418	0.372374	-0.0648031	-0.287512	-0.0592437	-0.403718	-0.363906	0.134554	-0.107105	0.379254	-0.192923	-0.549021	-0.560815	-0.573989	-0.570709	-0.495588	-0.608158	-0.537523	-0.458673	-0.46244	-0.436825	-0.618386	-0.0382817	0.152769	0.0342219	-0.375065	-0.310595	-0.327842	-0.167258	0.333826
VIT_00s0125g00220	0.411608	0.309753	0.244472	0.170527	0.41138	0.581989	0.495658	0.676553	0.305685	0.493104	0.453156	0.45896	0.362447	0.382923	0.581139	0.521276	0.39746	0.564388	0.246182	0.322766	0.619205	0.217595	-0.0167788	-0.0587987	-0.293127	-0.291024	0.0644139	-0.0956195	0.45422	-0.0108848	-0.714595	-0.655702	-0.415927	-0.478871	-0.282659	-0.303741	-0.514481	-0.410862	-0.478099	-0.471448	-0.514179	-0.264281	0.0705824	0.214179	-0.314255	-0.0933117	-0.226771	0.0209678	0.0116477
VIT_00s0125g00250	0.668305	0.449247	0.492508	0.294038	0.695516	0.650237	0.609319	0.744024	0.671442	0.638313	0.704758	0.796506	0.703002	0.829762	0.792739	0.840422	0.795983	0.837157	-0.0205149	0.0996773	0.514632	0.0652478	-0.0429321	-0.213845	-0.0592835	-0.221908	0.0256021	-0.150139	0.246406	-0.306868	-0.637859	-0.481905	-0.640433	-0.640813	-0.728409	-0.563778	-0.699756	-0.616731	-0.750715	-0.75006	-0.887542	-0.0874355	0.155188	0.263278	-0.23473	-0.053026	-0.308296	0.0276578	0.369526
VIT_00s0125g00260	0.0865201	0.0928797	-0.267685	-0.429079	0.686857	0.687306	0.146222	0.351555	0.0885673	0.16649	0.132387	0.0598276	0.106418	0.0890867	0.229018	0.248492	0.0852103	0.26239	0.616323	0.0635053	0.358204	0.274412	0.146157	0.0627584	-0.0507996	0.0718592	-0.165717	-0.649553	-0.0243192	-0.265581	-0.386651	-0.260094	-0.522468	-0.711388	0.0810107	0.036826	-0.322114	-0.160414	-0.230359	-0.0520907	-0.257612	-0.141702	-0.0657307	-0.197762	-0.154934	-0.0184638	0.00188891	0.0621289	0.31827
VIT_00s0125g00270	0.102999	-0.181254	-0.423098	-0.128977	0.123836	-0.26132	-0.303145	-0.303319	-0.214081	-0.527614	-0.575695	-0.469324	-0.299762	-0.173432	-0.281493	-0.399867	-0.341663	-0.413971	-0.134916	-0.482003	-0.438971	-0.374991	-0.375491	-0.0348424	-0.296275	-0.174166	0.0131529	-0.175213	-0.354024	-0.350328	0.387161	0.212644	-0.0721242	0.09879	0.178665	-0.0664721	0.342718	0.29855	0.412128	0.5688	0.34665	0.433187	0.200629	-0.424698	0.0296679	-0.296925	-0.0103742	-0.205243	0.560871
VIT_00s0125g00280	-0.178683	0.138424	-0.244525	-0.120889	-0.246402	-0.312805	-0.4313	-0.411249	-0.240489	-0.279185	-0.437522	-0.365151	-0.190485	-0.356385	-0.184431	-0.330055	-0.11579	-0.178931	-0.0504992	-0.145972	-0.336037	-0.0974294	-0.138405	-0.104044	-0.0489271	0.125868	-0.33781	-0.241178	-0.325285	-0.135431	0.354668	0.189805	0.218931	0.27338	0.164744	0.144191	0.270532	0.509652	0.0714114	0.273308	0.276574	0.0602142	-0.193859	-0.399716	-0.0656757	-0.192045	0.454514	0.695535	-0.074712
VIT_00s0125g00290	-0.482678	-0.191623	-0.135404	-0.0301474	-0.577961	-0.345287	-0.510161	-0.504291	-0.462218	-0.356375	-0.383075	-0.395415	-0.415504	-0.603102	-0.502355	-0.546991	-0.454375	-0.455055	0.199743	0.222236	-0.110395	0.0601685	0.108744	-0.129411	-0.0589321	-0.06687	-0.216627	0.134785	-0.108101	0.268038	0.196384	0.112994	0.550837	0.647869	0.478501	0.504506	0.517677	0.469231	0.409682	0.377848	0.611717	-0.00641479	0.0480637	0.0925466	0.233252	0.187246	0.180621	0.054432	-0.452674
VIT_00s0125g00310	0.229082	0.180594	0.106225	-0.0448553	0.300148	0.257253	0.289836	0.349859	0.217676	0.253294	0.422739	0.442853	0.269245	0.402884	0.290273	0.373029	0.334201	0.384661	-0.0620238	0.0222671	0.308407	0.0519905	0.0840401	-0.0495759	0.0527862	-0.136911	0.224275	-0.0169047	0.160106	0.0384752	-0.352868	-0.193077	-0.406473	-0.386971	-0.291094	-0.192746	-0.299168	-0.303835	-0.371197	-0.347873	-0.427581	0.0189688	0.200442	0.227563	0.0478574	0.122733	-0.250169	0.107618	0.137906
VIT_00s0125g00350	0.199258	-0.0385672	0.574548	0.626735	-0.0339757	0.0867086	0.269634	0.198636	0.351089	0.241347	0.131654	0.144549	0.187952	0.143721	0.246718	0.234738	0.206354	0.1899	0.0931669	0.223189	0.19859	0.102654	0.00356715	0.0292519	-0.0684336	-0.0421062	-0.268275	0.193406	-0.0435783	-0.377135	-0.160381	-0.197236	0.2904	0.357268	-0.301629	-0.136676	-0.215002	-0.256399	-0.0987806	-0.283867	-0.170514	-0.169451	-0.0736912	0.217492	-0.166927	-0.0164197	-0.129381	-0.169218	0.0333932
VIT_00s0125g00410	-0.266806	-0.444651	-0.530433	-0.277058	-0.194781	-0.286702	-0.27994	-0.327747	-0.467628	-0.603444	-0.542141	-0.515176	-0.662472	-0.455926	-0.567095	-0.597073	-0.665014	-0.666683	0.090821	-0.186205	-0.256536	-0.188849	-0.151041	0.183341	-0.299906	-0.32957	0.165464	-0.0235375	-0.108472	0.199697	0.252857	0.147473	0.214	0.261852	0.53095	0.24733	0.577566	0.329921	0.743065	0.669181	0.605402	0.336424	0.373943	-0.0472653	0.269751	0.0248518	-0.201936	-0.410408	0.0569553
VIT_00s0125g00420	0.586509	0.312669	-0.00852254	0.41896	0.0131592	-0.22836	0.031492	0.0939083	-0.000913573	-0.0831839	-0.376101	-0.174645	0.071244	0.118699	0.342912	-0.0482478	0.124809	0.0295874	-0.470587	-0.307575	-0.292144	-0.473437	-0.778888	-0.230595	-0.655001	-0.453726	-0.00233633	0.0745564	0.15899	-0.202735	0.107378	-0.345214	-0.114553	0.0826202	-0.287445	-0.685762	-0.0147714	0.168846	-0.0948371	0.129344	-0.0654923	0.180003	0.0147942	-0.40696	-0.538	-0.754433	-0.0227879	-0.295679	0.226371
VIT_00s0131g00010	0.347918	0.137271	-0.333034	0.118593	-0.0638485	-0.334538	-0.2546	-0.213196	-0.303526	-0.40583	-0.627777	-0.455646	-0.311732	-0.15301	0.00848717	-0.356399	-0.159353	-0.243888	-0.225894	-0.41677	-0.480988	-0.499282	-0.702218	-0.178668	-0.578888	-0.324761	0.0312287	-0.0402155	-0.0874799	-0.218213	0.333475	-0.09036	-0.094081	0.165316	-0.00872179	-0.427043	0.255399	0.393947	0.142111	0.478496	0.210848	0.330817	0.0306595	-0.546438	-0.340169	-0.667624	0.0406504	-0.271716	0.260351
VIT_00s0131g00120	-0.449855	-0.591585	-0.328814	-0.264085	-0.409725	-0.445029	-0.27365	-0.33849	-0.272913	-0.287979	-0.34691	-0.564561	-0.401708	-0.484086	-0.539693	-0.494586	-0.640754	-0.667449	-0.162478	-0.173431	-0.377193	0.0532844	0.11557	0.422286	0.190492	0.384066	0.332175	0.296204	-0.0169952	0.374881	0.469837	0.415162	0.445416	0.262137	0.523171	0.329731	0.304574	0.106629	0.638601	0.484475	0.541468	-0.0691958	-0.294977	-0.258494	0.0836142	-0.00127195	-0.128245	-0.174697	-0.208867
VIT_00s0131g00250	-0.494264	-0.206228	-0.0462052	-0.263385	-0.271659	0.119009	-0.0516973	0.0149126	-0.21885	0.0631714	0.221468	0.0815218	-0.131363	-0.316165	-0.25324	-0.116529	-0.243672	-0.0818178	0.321555	0.434327	0.498748	0.462531	0.51501	0.0917039	0.114944	-0.0687404	0.0318485	0.0857126	0.260196	0.526897	-0.400672	-0.18206	0.232876	0.0983258	0.436256	0.573431	0.102855	-0.0172515	0.152611	-0.0536924	0.215538	-0.27409	0.132419	0.504757	0.305422	0.538609	-0.0823883	0.0421301	-0.506949
VIT_00s0144g00010	0.45259	0.151815	0.340628	0.115206	0.820231	0.670889	0.357009	0.520506	0.625458	0.409362	0.502618	0.536505	0.511004	0.640939	0.51166	0.616944	0.537689	0.551549	0.271882	-0.0297277	0.370613	0.136156	0.108188	-0.195579	0.131464	0.00688627	-0.235578	-0.470211	-0.197622	-0.635412	-0.411638	-0.192826	-0.542407	-0.582618	-0.53949	-0.307707	-0.561772	-0.570761	-0.45532	-0.489917	-0.68275	-0.0211713	0.118416	0.0897887	-0.0665283	0.0743805	-0.299312	-0.0851053	0.599058
VIT_00s0144g00040	-0.409828	-0.252757	-0.485169	-0.529173	0.00612392	-0.0679125	-0.488121	-0.522271	-0.38342	-0.492444	-0.282217	-0.290032	-0.545243	-0.282442	-0.579861	-0.430586	-0.419538	-0.458007	0.333927	-0.0974579	-0.323612	-0.0846499	0.17086	-0.128969	0.266839	0.12436	-0.0488199	-0.314151	-0.422533	0.0478558	0.363805	0.501482	0.00204709	0.036897	0.412595	0.467484	0.46964	0.291042	0.385227	0.455366	0.398588	0.31434	0.217979	-0.109243	0.499867	0.300026	0.0373734	-0.0886767	0.150265
VIT_00s0144g00120	-0.5365	-0.340838	-0.549614	-0.650856	-0.0440032	-0.120707	-0.55053	-0.621572	-0.460947	-0.617268	-0.293333	-0.294153	-0.478444	-0.357263	-0.725096	-0.51869	-0.481265	-0.513456	0.368991	-0.181834	-0.307223	-0.0682534	0.278744	-0.0784709	0.348264	0.0916776	-0.0246668	-0.337431	-0.546506	0.0261601	0.402963	0.593516	0.0395931	0.0885162	0.506375	0.60966	0.589269	0.383053	0.498068	0.537402	0.494921	0.413397	0.351114	0.0234642	0.685959	0.482534	0.114864	0.0819901	0.154171
VIT_00s0144g00190	-0.618933	-0.506494	-0.467419	-0.74819	0.0228376	-0.00936815	-0.34167	-0.362221	-0.213235	-0.330858	-0.00638149	-0.158478	-0.332799	-0.251502	-0.615091	-0.299658	-0.418252	-0.410804	0.324854	-0.0719268	-0.15096	0.207426	0.514385	0.214619	0.595607	0.397728	0.142301	-0.301834	-0.443053	0.191847	0.290225	0.617526	0.0601486	-0.143474	0.463236	0.62756	0.29876	0.0272191	0.426222	0.30361	0.276087	0.146581	0.0882492	0.0220615	0.614346	0.558712	-0.0969929	0.218278	0.0372968
VIT_00s0144g00210	0.562177	0.107206	0.33322	0.324778	0.590711	0.277157	0.204121	0.343564	0.580629	0.246861	0.202098	0.288146	0.426997	0.546018	0.455471	0.403535	0.422985	0.344959	-0.132417	-0.207155	0.0778874	-0.103766	-0.198086	-0.224423	-0.0775038	-0.0605861	-0.117124	-0.206356	-0.228127	-0.683716	-0.153873	-0.138778	-0.381323	-0.30024	-0.560003	-0.486405	-0.434016	-0.4347	-0.30108	-0.304455	-0.517527	0.100745	0.0616217	-0.160141	-0.219454	-0.242116	-0.309959	-0.194286	0.695028
VIT_00s0144g00220	-0.624839	-0.420364	-0.420072	-0.660366	-0.0122486	0.166943	-0.324986	-0.17007	-0.278808	-0.0801433	-0.0369295	-0.317915	-0.354558	-0.498285	-0.417934	-0.294607	-0.479726	-0.312091	0.522925	0.157606	0.201673	0.543333	0.569043	0.231885	0.314133	0.459709	0.0334628	-0.262862	-0.0948255	0.249402	-0.0735378	0.145371	0.130135	-0.183953	0.645201	0.692956	0.0561123	0.0247967	0.291954	0.253987	0.31768	-0.301945	-0.268196	-0.134736	0.184269	0.343526	0.10337	0.194543	-0.180288
VIT_00s0144g00270	-0.770779	-0.551532	-0.31784	-0.668151	-0.157781	-0.0296837	-0.28956	-0.386299	-0.289502	-0.324366	0.0707832	-0.0902585	-0.376892	-0.34849	-0.711534	-0.321393	-0.464413	-0.41694	0.372159	0.095618	0.0295882	0.301021	0.680019	0.224937	0.606218	0.277896	0.0678312	-0.138753	-0.346054	0.329066	0.153027	0.549859	0.25313	0.0754516	0.551953	0.811774	0.388326	0.0539619	0.49929	0.239894	0.374013	0.108754	0.233902	0.364197	0.782092	0.806791	-0.0142138	0.166597	-0.170472
VIT_00s0144g00290	0.133346	-0.147397	-0.0762699	-0.166193	0.436627	0.0904541	-0.0188875	0.0918726	0.368015	0.0745913	-0.0451572	-0.139545	0.204841	0.163475	0.119686	0.132051	0.076952	0.0254689	-0.0904055	-0.434345	-0.223627	0.0451611	-0.00198113	0.155258	0.252736	0.522518	-0.0702229	-0.359028	-0.426752	-0.555671	0.253613	0.286121	-0.169866	-0.363638	-0.161586	-0.154338	-0.31436	-0.235704	-0.0375072	0.00852729	-0.222582	-0.0329796	-0.415925	-0.585464	-0.224376	-0.267113	0.0534344	0.190306	0.559005
VIT_00s0153g00050	-0.760039	-0.737182	-0.312741	-0.474869	-0.317842	-0.158837	-0.314849	-0.180318	-0.193086	-0.0810894	-0.181249	-0.565026	-0.328379	-0.680466	-0.502947	-0.444266	-0.686265	-0.570072	0.249151	0.098505	0.0863397	0.622699	0.56361	0.510111	0.336667	0.651116	0.045185	-0.0285857	-0.123893	0.272247	0.121625	0.240893	0.557164	0.11834	0.723442	0.686274	0.0511701	-0.059171	0.566268	0.328177	0.476231	-0.470723	-0.54156	-0.244391	0.0392757	0.223643	0.0264982	0.105635	-0.345092
VIT_00s0153g00070	-0.649717	-0.253966	-0.139869	-0.435967	-0.313872	-0.113474	-0.228774	-0.495434	-0.374623	-0.343979	0.159469	0.141847	-0.296639	-0.184449	-0.6612	-0.251106	-0.24887	-0.266122	0.283495	0.176954	-0.0547977	0.0412635	0.559075	0.0360688	0.614177	0.0829932	0.0705822	0.0778817	-0.248085	0.405364	0.221487	0.587368	0.195779	0.248046	0.346433	0.702767	0.522186	0.203365	0.323314	0.125805	0.336822	0.282485	0.446323	0.62782	0.91202	0.880459	0.07364	0.145544	-0.303658
VIT_00s0160g00020	0.155521	0.0047963	-0.458175	-0.284348	0.194677	0.109815	-0.0875282	0.170865	-0.253708	-0.223555	-0.188447	-0.134443	-0.172577	-0.106261	0.00487537	-0.171796	-0.206933	-0.0682212	0.152449	-0.055844	0.247267	-0.0031035	-0.212689	-0.121508	-0.53831	-0.542291	0.25889	-0.223796	0.136706	0.0877479	-0.376896	-0.446224	-0.345707	-0.253142	0.226777	-0.0606094	0.0686547	0.0845801	0.0741811	0.253432	0.0744522	0.149709	0.373753	-0.0903363	-0.0704876	-0.166812	-0.192025	-0.113788	0.206095
VIT_00s0160g00090	-0.226778	-0.359275	-0.281802	-0.22508	0.0173498	0.0491501	-0.0993141	0.115536	-0.0969054	0.0525905	-0.261531	-0.532855	-0.158538	-0.446647	-0.0579827	-0.218112	-0.429452	-0.277431	0.254182	-0.0332822	0.118549	0.426946	0.148535	0.383941	-0.0654777	0.449387	0.0098684	-0.138686	0.045269	-0.0516231	-0.0473308	-0.132729	0.161906	-0.146217	0.439096	0.200634	-0.196792	-0.078079	0.212782	0.263465	0.222235	-0.474281	-0.605275	-0.531301	-0.429611	-0.269998	0.0809449	-0.088154	-0.0609444
VIT_00s0160g00100	-0.612782	-0.462099	-0.153155	-0.445806	0.0285889	0.316799	0.0261024	0.0508787	-0.0693728	0.112687	0.112813	-0.193285	-0.172003	-0.419054	-0.282876	-0.0786349	-0.370283	-0.174018	0.629784	0.314071	0.389956	0.679191	0.702257	0.478304	0.372449	0.529891	-0.149781	-0.22278	-0.0427977	0.111119	-0.221128	0.0685634	0.221231	-0.148718	0.539213	0.688741	-0.0888616	-0.144167	0.231417	0.0696788	0.213104	-0.462914	-0.332524	0.0760648	0.14322	0.447606	0.0274166	0.0920645	-0.228768
VIT_00s0160g00110	-0.563774	-0.438069	-0.226119	-0.41428	-0.00469348	0.32541	-0.0385691	0.143264	-0.11919	0.140295	0.00325145	-0.315401	-0.262843	-0.536725	-0.20121	-0.153954	-0.458768	-0.219383	0.634812	0.404537	0.49353	0.746447	0.573922	0.426399	0.0863544	0.372877	-0.142532	-0.259574	0.0920765	0.198582	-0.367587	-0.206577	0.26793	-0.153924	0.627244	0.614943	-0.142152	-0.132765	0.252974	0.111114	0.24428	-0.587	-0.387191	-0.0512537	-0.0803944	0.254145	-0.00360506	-0.0386471	-0.325816
VIT_00s0160g00120	-0.401956	-0.44121	-0.0574081	-0.186687	-0.0705272	-0.0672939	-0.132745	-0.181701	0.000610508	-0.0129225	-0.0412864	-0.297017	-0.103417	-0.254456	-0.285818	-0.156549	-0.305212	-0.289767	0.195658	-0.042681	-0.0978624	0.321822	0.4204	0.325501	0.493389	0.701909	-0.00166643	0.00530168	-0.260048	-0.129852	0.267263	0.401652	0.237906	0.0503047	0.278845	0.386851	-0.038358	-0.106906	0.24032	0.160166	0.217374	-0.260292	-0.458304	-0.201873	0.0647007	0.188344	0.112343	-0.0362363	0.00310706
VIT_00s0160g00130	-0.568882	-0.458804	-0.427878	-0.600283	-0.104731	-0.28859	-0.452236	-0.627888	-0.310904	-0.533739	-0.186593	-0.260032	-0.367597	-0.239402	-0.740438	-0.425018	-0.433069	-0.530843	0.0852227	-0.313921	-0.475115	-0.0821386	0.363927	0.103299	0.652415	0.416665	0.1187	-0.131676	-0.591938	0.0433151	0.62166	0.87057	0.118313	0.101889	0.384478	0.560763	0.497417	0.218311	0.491832	0.445065	0.422398	0.371177	0.145021	-0.0264362	0.705439	0.506272	0.123082	0.029114	0.16916
VIT_00s0160g00160	-0.124099	-0.0459507	-0.204383	-0.25343	0.0351365	0.0946531	-0.0581393	-0.065587	-0.271683	-0.304284	0.0986906	0.214307	-0.101653	0.020017	-0.261853	-0.102983	-0.101218	-0.0304327	0.261393	0.0975084	0.252722	-0.0430378	0.155489	-0.194598	-0.0554796	-0.538816	0.141153	-0.0895711	-0.0720862	0.17439	-0.27194	-0.0653322	-0.19139	0.0196848	0.146606	0.256381	0.313281	0.0987852	0.103938	0.0981508	0.101661	0.360765	0.743355	0.553284	0.568031	0.501563	-0.168683	-0.0729025	0.0411038
VIT_00s0160g00210	-0.298653	-0.269766	-0.134603	-0.388161	0.104043	-0.101145	-0.229184	-0.459242	-0.0243643	-0.344327	0.0918827	0.114866	-0.152258	0.159813	-0.490804	-0.0937849	-0.0678785	-0.225244	0.0549773	-0.236935	-0.442211	-0.216935	0.298666	0.00602952	0.734664	0.314955	0.10405	-0.117421	-0.579569	-0.0924561	0.563965	0.866565	-0.0472762	-0.0105611	0.00102205	0.307755	0.337603	0.0222195	0.25459	0.13775	0.0774933	0.484044	0.286351	0.163328	0.735618	0.533592	-0.0137264	0.0527113	0.30677
VIT_00s0160g00220	-0.158049	-0.130466	-0.193066	-0.263314	-0.0515689	-0.23402	-0.239699	-0.481519	-0.266903	-0.561841	0.00385056	0.194768	-0.19657	0.164919	-0.515228	-0.207072	-0.0781343	-0.218805	-0.0165646	-0.23341	-0.334425	-0.421378	0.0787065	-0.239549	0.357419	-0.300178	0.191236	-0.00303824	-0.494113	0.031687	0.366242	0.591534	-0.11866	0.210649	-0.0279627	0.207317	0.569748	0.199874	0.240954	0.225491	0.154217	0.744433	0.795778	0.471972	0.877965	0.579515	-0.16077	-0.131437	0.25019
VIT_00s0160g00310	-0.584485	-0.413519	-0.0453663	-0.337655	-0.0554014	0.268125	0.0100001	0.0505867	-0.0946056	0.0918545	0.236696	0.00586372	-0.0923494	-0.316558	-0.315404	-0.066119	-0.31587	-0.138931	0.53925	0.438783	0.456053	0.574087	0.686607	0.28786	0.324831	0.261372	-0.0304017	-0.0295256	0.0764158	0.301128	-0.290924	0.0294446	0.202577	-0.0510654	0.479548	0.674314	0.0170753	-0.15134	0.255223	-0.00969669	0.222342	-0.323375	-0.0244449	0.372779	0.339298	0.607311	-0.0828309	0.0436635	-0.33322
VIT_00s0160g00320	-0.521201	-0.34824	-0.179131	-0.46037	0.0838076	0.320981	-0.147362	0.0119453	-0.123181	0.0725242	0.128571	-0.118585	-0.112555	-0.351943	-0.225323	-0.103631	-0.289755	-0.102156	0.599464	0.270542	0.436569	0.62602	0.635829	0.183265	0.310822	0.390314	-0.155174	-0.301189	-0.125499	0.0438498	-0.279752	-0.0115839	0.0675007	-0.182477	0.46601	0.620104	-0.102314	-0.131081	0.11368	0.048228	0.137571	-0.373111	-0.203771	0.0510813	0.163047	0.430035	0.00475398	0.0325968	-0.144664
VIT_00s0160g00330	-0.454434	-0.37697	0.0987347	-0.215641	0.0144916	0.412868	0.189575	0.306758	0.0416592	0.322091	0.39436	0.0920102	0.0592155	-0.240196	-0.0746828	0.0939281	-0.211424	0.035979	0.572247	0.495219	0.751676	0.766795	0.723534	0.332299	0.218898	0.237651	0.00134959	-0.00860845	0.229212	0.225065	-0.59578	-0.28184	0.155131	-0.146067	0.391035	0.566416	-0.26044	-0.35841	0.0759425	-0.194481	0.0370264	-0.556476	-0.146084	0.416922	0.105829	0.531709	-0.125653	0.00996056	-0.336231
VIT_00s0160g00340	-0.638588	-0.633784	-0.407586	-0.578494	-0.104625	-0.199231	-0.377435	-0.395249	-0.227833	-0.307822	-0.172732	-0.434202	-0.304712	-0.420487	-0.6211	-0.409195	-0.568536	-0.549575	0.167641	-0.22095	-0.203959	0.292595	0.510335	0.331491	0.566854	0.645579	0.14202	-0.0930051	-0.407521	0.0439132	0.394036	0.607524	0.231631	0.0188177	0.552874	0.6252	0.225621	0.0469766	0.511854	0.427307	0.441954	-0.0565273	-0.247189	-0.19045	0.362912	0.371043	0.112881	0.00397544	0.0607127
VIT_00s0163g00030	0.33065	0.264227	-0.217414	0.0866906	-0.131656	-0.477365	-0.240812	-0.479019	-0.324448	-0.645715	-0.323452	0.0658562	-0.214888	0.261912	-0.250076	-0.248146	0.0678553	-0.167865	-0.431014	-0.452415	-0.665429	-0.910304	-0.609221	-0.456955	-0.184197	-0.660319	0.261243	0.152575	-0.283189	-0.0292079	0.528152	0.369095	-0.228231	0.31893	-0.270738	-0.351078	0.63068	0.465892	0.119918	0.329818	0.140677	0.934489	0.79757	0.136279	0.452088	-0.0697585	-0.0484963	-0.189408	0.341518
VIT_00s0169g00040	0.498803	0.28584	0.0213375	0.0617017	0.467111	0.121286	0.0782323	0.0367563	0.23578	-0.0188576	0.0173901	0.196093	0.200252	0.503758	0.249667	0.254753	0.369252	0.233314	-0.174232	-0.2448	-0.370789	-0.487637	-0.405142	-0.248376	0.0107725	-0.0617799	0.0310791	-0.180876	-0.207937	-0.384864	0.273079	0.206911	-0.48832	-0.326753	-0.467226	-0.498199	-0.0889208	-0.0662211	-0.257401	-0.0716461	-0.34184	0.413573	0.138851	-0.278423	-0.0502436	-0.300745	-0.123459	0.00951407	0.551885
VIT_00s0173g00170	-0.334379	-0.149258	0.19654	-0.0208345	-0.148079	0.247307	0.188353	0.122362	0.0182775	0.249091	0.302829	0.153017	0.00393039	-0.131286	-0.0555979	0.104506	-0.040043	0.0637792	0.428634	0.735253	0.371187	0.388429	0.441235	0.250666	0.215473	0.142007	-0.0127638	0.140226	0.235484	0.338212	-0.25603	-0.0725632	0.255157	0.0504056	0.19245	0.361527	-0.0539271	-0.141692	0.0536409	-0.201704	0.0467446	-0.319502	-0.0835391	0.40701	0.141534	0.396004	-0.0428725	0.117419	-0.475469
VIT_00s0174g00010	-0.374858	-0.25366	-0.290101	-0.327691	0.0182294	-0.0585928	-0.273616	-0.496858	-0.235177	-0.507725	-0.342417	-0.2604	-0.447807	-0.242967	-0.525964	-0.3076	-0.292793	-0.37733	0.369007	-0.0825536	-0.393164	-0.166355	0.121058	0.122558	0.296044	0.118786	-0.386499	-0.414534	-0.664856	-0.250833	0.504314	0.606194	0.192458	0.223642	0.253703	0.404892	0.507353	0.331644	0.432774	0.401337	0.343063	0.390435	0.236211	-0.0164786	0.518812	0.328623	0.0871023	-0.0484781	0.180185
VIT_00s0174g00070	0.298694	0.135686	-0.30622	0.141221	-0.176525	-0.491625	-0.197131	-0.265362	-0.273705	-0.371883	-0.589042	-0.438183	-0.232142	-0.0917851	-0.0354409	-0.31665	-0.150139	-0.290744	-0.490902	-0.498911	-0.66592	-0.585649	-0.699453	-0.074606	-0.396174	-0.174994	0.163107	0.12578	-0.0170521	-0.0368796	0.551722	0.121502	0.012845	0.200906	-0.0414377	-0.460436	0.288455	0.414632	0.161367	0.452307	0.240308	0.321163	-0.0698068	-0.531248	-0.313387	-0.648928	0.173151	-0.122385	0.136822
VIT_00s0174g00090	0.342631	0.308374	0.508937	0.314729	0.354926	0.362502	0.318253	0.336364	0.475746	0.442564	0.570304	0.610412	0.530028	0.57636	0.462218	0.535098	0.579637	0.55165	0.0262523	0.0493504	0.315281	0.084697	0.135152	-0.29379	0.239216	0.0346789	-0.116071	-0.0771165	0.00193854	-0.344636	-0.345802	-0.161209	-0.352453	-0.284506	-0.563233	-0.265565	-0.45942	-0.436617	-0.562373	-0.588984	-0.580929	-0.108046	0.0518104	0.278657	-0.035005	0.157566	-0.0576937	-0.02126	0.207751
VIT_00s0174g00100	0.545807	0.528642	0.115008	0.103429	0.403438	0.236	0.129831	0.270512	0.223674	0.229572	0.326825	0.476463	0.340158	0.572424	0.46991	0.379074	0.534287	0.478407	-0.195128	-0.247712	0.0806781	-0.24487	-0.248235	-0.44046	-0.0998822	-0.224202	0.148683	-0.10168	0.157428	-0.171156	-0.232629	-0.233139	-0.677272	-0.4817	-0.525141	-0.508987	-0.316091	-0.165373	-0.566593	-0.336	-0.520451	0.14988	0.181613	-0.0191838	-0.14329	-0.194246	-0.085454	-0.0882954	0.310623
VIT_00s0174g00110	0.479261	0.317024	0.10354	0.464359	-0.086183	-0.305081	-0.0369314	0.0117545	0.110491	0.0767905	-0.332523	-0.222467	0.116959	0.0738008	0.342681	-0.0151648	0.163488	0.0366265	-0.523937	-0.214841	-0.396017	-0.371857	-0.640881	-0.16233	-0.417156	-0.0172717	-0.0102119	0.212791	0.1694	-0.17514	0.270832	-0.148657	-0.00132408	0.116691	-0.289908	-0.584993	-0.106376	0.15624	-0.152828	0.062066	-0.0406073	-0.0240746	-0.359905	-0.594666	-0.625162	-0.795053	0.107349	-0.134163	0.099083
VIT_00s0174g00120	0.422148	0.251133	-0.0695575	-0.151352	0.440229	0.215121	0.149227	0.156617	0.111734	0.00652416	0.313135	0.447045	0.210126	0.560451	0.203486	0.281179	0.352669	0.315211	-0.110203	-0.252572	-0.00601284	-0.309667	-0.167946	-0.315015	0.0263139	-0.305593	0.428885	-0.0825424	0.0207971	-0.0450074	-0.131813	-0.0104411	-0.669322	-0.497458	-0.366817	-0.359033	-0.115674	-0.197245	-0.313039	-0.167082	-0.40633	0.403289	0.462507	0.143767	0.189277	0.0447885	-0.156752	-0.0993886	0.430268
VIT_00s0174g00130	-0.161803	-0.350382	-0.118952	-0.147734	-0.000352666	-0.242099	-0.393508	-0.346243	0.0698044	-0.254676	-0.299867	-0.350991	-0.117137	-0.170697	-0.275223	-0.26782	-0.2169	-0.334423	-0.0857234	-0.329173	-0.385935	-0.0201678	0.0232889	0.00911961	0.240608	0.35445	-0.157813	-0.20357	-0.594104	-0.376379	0.432908	0.429562	0.215154	0.161475	0.0868534	0.130952	0.105958	0.0157595	0.276852	0.251422	0.152019	0.116207	-0.200058	-0.433799	0.0771845	-0.0705215	0.00880729	-0.0148565	0.339989
VIT_00s0174g00140	0.372758	0.251406	-0.179988	-0.136941	0.417791	0.109237	-0.149384	0.144084	0.162183	0.0200696	-0.0388883	0.0226051	0.228992	0.23151	0.310506	0.112489	0.236455	0.228981	-0.090302	-0.372806	-0.00622703	-0.055579	-0.239202	-0.326046	-0.143453	-0.0346658	-0.0203222	-0.452591	-0.263456	-0.446508	-0.105433	-0.172405	-0.455073	-0.39626	-0.256485	-0.332179	-0.287829	-0.0679233	-0.347784	-0.052404	-0.339653	0.0725298	-0.0558375	-0.460981	-0.282721	-0.358618	0.0644364	0.287203	0.483139
VIT_00s0174g00150	-0.244562	-0.312732	-0.158616	-0.47079	0.453849	0.441912	-0.00455731	0.105115	0.169247	0.0388815	0.147726	0.0190943	-0.0474415	0.00119143	-0.0968493	0.121888	-0.0723393	0.00099715	0.506783	0.0168382	0.121265	0.321485	0.372402	0.229234	0.392715	0.338905	-0.180851	-0.542488	-0.371273	-0.185201	-0.0116666	0.224474	-0.0728752	-0.418165	0.132939	0.266072	-0.158131	-0.27971	0.0826965	-0.0355643	-0.171511	-0.0647531	-0.109717	-0.0934049	0.17356	0.261716	-0.0990846	-0.000448415	0.195671
VIT_00s0174g00160	-0.205249	-0.217516	-0.491866	-0.083336	-0.614943	-0.798224	-0.574668	-0.620975	-0.596553	-0.651997	-0.764016	-0.696559	-0.608722	-0.561747	-0.542264	-0.803589	-0.620702	-0.752073	-0.453689	-0.334278	-0.657279	-0.431541	-0.455978	-0.0581866	-0.34081	-0.20462	0.219845	0.265972	-0.0592615	0.321504	0.637443	0.262589	0.411776	0.547537	0.446317	0.0398658	0.666529	0.622158	0.664635	0.74026	0.725712	0.325456	0.0598734	-0.385653	0.0166445	-0.346452	0.169046	-0.139737	-0.163311
VIT_00s0174g00170	-0.489038	-0.572127	-0.0542505	-0.215453	-0.267268	-0.0490235	0.00721029	0.0112588	-0.129229	0.0102293	0.191274	-0.0729292	-0.250088	-0.277379	-0.389271	-0.1783	-0.440096	-0.314249	0.166369	0.27293	0.319461	0.431059	0.553697	0.314244	0.263748	0.189666	0.360395	0.330908	0.185811	0.466644	-0.204423	0.0686489	0.270091	0.12264	0.44629	0.534261	0.068819	-0.254925	0.382761	0.08662	0.285887	-0.24772	0.0205895	0.375142	0.334631	0.510515	-0.341066	-0.158794	-0.304182
VIT_00s0174g00190	0.0110022	-0.0225596	-0.104617	0.0586206	-0.350157	-0.679369	-0.292301	-0.628443	-0.261597	-0.545828	-0.285574	-0.0941444	-0.150557	0.0951664	-0.410131	-0.294315	-0.0576108	-0.305686	-0.577713	-0.482202	-0.786809	-0.679754	-0.296191	-0.165962	0.256503	-0.0518727	0.290955	0.380902	-0.38979	0.0224509	0.802245	0.718223	0.0997318	0.466295	-0.144648	-0.114073	0.551619	0.370565	0.22904	0.322506	0.246083	0.680006	0.327459	0.0197041	0.455159	0.0441649	0.141262	-0.0786997	0.175283
VIT_00s0174g00200	0.0885281	-0.0930604	-0.229633	-0.346226	0.428295	0.325572	0.0828473	0.402517	0.143913	0.171553	0.138846	0.0137432	0.21766	0.0676606	0.227661	0.194832	0.0324002	0.188022	0.129779	-0.124392	0.369267	0.353937	0.131689	0.0988121	-0.0622353	0.0523627	0.0961243	-0.374263	-0.0244	-0.099548	-0.391768	-0.30437	-0.297026	-0.505393	0.0401248	-0.0418944	-0.385558	-0.29567	-0.198589	-0.092175	-0.28879	-0.21124	-0.142341	-0.203611	-0.226051	-0.0878387	-0.115922	0.123264	0.236837
VIT_00s0174g00260	0.242408	-0.104432	-0.291331	-0.133135	0.303106	-0.0489849	-0.143028	-0.0379883	0.0685288	-0.255245	-0.372791	-0.300622	-0.0384766	0.0174298	0.0202224	-0.0797126	-0.0655421	-0.100461	-0.102842	-0.536346	-0.31594	-0.213404	-0.33936	0.0105144	-0.173449	-0.0136355	-0.0172403	-0.317663	-0.40332	-0.45272	0.230876	0.0879952	-0.159179	-0.123866	-0.063191	-0.243177	-0.00764572	0.0237712	0.0508798	0.257083	-0.0567606	0.249572	-0.0462746	-0.547963	-0.192704	-0.406027	-0.0856576	-0.0627442	0.586953
VIT_00s0174g00270	-0.648303	-0.5335	-0.541223	-0.693623	-0.140237	-0.141922	-0.422934	-0.462796	-0.461289	-0.453451	-0.247042	-0.400216	-0.478204	-0.479925	-0.700966	-0.503528	-0.602317	-0.566352	0.304765	-0.062574	-0.229508	0.1203	0.372667	0.275844	0.386644	0.313911	0.161914	-0.123256	-0.312195	0.284946	0.407099	0.554905	0.204112	0.0248174	0.644878	0.629501	0.442326	0.236263	0.600428	0.52023	0.516087	0.155933	0.0215142	-0.0687684	0.492706	0.382698	0.105638	-0.0286284	-0.0886529
VIT_00s0174g00280	-0.553167	-0.253845	-0.330803	-0.485475	-0.244825	-0.303551	-0.436654	-0.726889	-0.457364	-0.590688	-0.157767	-0.107248	-0.394264	-0.213365	-0.746112	-0.423749	-0.319216	-0.433624	0.125028	-0.167429	-0.470482	-0.24799	0.289934	-0.0243788	0.585615	0.16581	0.0342591	-0.0342166	-0.524126	0.15575	0.632629	0.843342	0.143752	0.266763	0.32097	0.546611	0.663912	0.402004	0.433251	0.399812	0.439768	0.52121	0.370589	0.239737	0.842338	0.602688	0.222781	0.0491379	-0.0156662
VIT_00s0174g00290	0.198848	-0.0172071	0.0832565	-0.219465	0.655177	0.60259	0.28425	0.525998	0.440619	0.422158	0.543954	0.39577	0.424156	0.434455	0.37748	0.498828	0.320713	0.446008	0.324219	-0.0199264	0.465772	0.380405	0.32933	0.0301942	0.273337	0.249843	0.158549	-0.342664	-0.0366914	-0.283495	-0.447333	-0.177104	-0.499466	-0.704348	-0.223531	-0.078166	-0.602108	-0.586249	-0.391693	-0.401301	-0.565939	-0.233902	-0.124784	0.0133244	-0.102524	0.128356	-0.156712	0.118513	0.366224
VIT_00s0174g00300	-0.196409	-0.2604	-0.174059	-0.414289	0.457531	0.406784	-0.0359333	0.158617	0.199327	0.217113	0.0920497	-0.163651	0.100728	-0.0771425	0.0401905	0.109441	-0.0978443	0.0147059	0.400171	-0.0130691	0.122702	0.443995	0.372603	0.255229	0.362006	0.693527	-0.115346	-0.434229	-0.182013	-0.279651	-0.0168548	0.145474	-0.165796	-0.537803	0.198085	0.227607	-0.369314	-0.277138	-0.0189725	0.00213408	-0.10258	-0.357058	-0.549524	-0.445329	-0.187303	-0.0127623	0.0947171	0.173562	0.248889
VIT_00s0174g00310	-0.250564	-0.180804	-0.472525	-0.296362	-0.238863	-0.381917	-0.415771	-0.42807	-0.341387	-0.318551	-0.49615	-0.593121	-0.415658	-0.410836	-0.343575	-0.484028	-0.435425	-0.508029	-0.123423	-0.324661	-0.563435	-0.134743	-0.144787	0.117188	0.0771632	0.416324	0.119395	-0.0313862	-0.103145	0.124357	0.569524	0.378673	0.132924	0.049062	0.373479	0.107616	0.2676	0.340576	0.353964	0.517019	0.436071	-0.010053	-0.408807	-0.63112	-0.134215	-0.304877	0.239986	-0.0269255	-0.0624689
VIT_00s0174g00320	0.575009	0.0757202	0.179696	0.198728	0.599257	0.195243	0.292729	0.314469	0.51827	0.0743675	0.159709	0.296998	0.388343	0.597905	0.34505	0.395901	0.392309	0.314782	-0.203954	-0.430007	-0.0418274	-0.251519	-0.243374	-0.083733	-0.0431307	-0.156216	0.0565877	-0.207516	-0.307267	-0.661683	-0.0466895	0.00344389	-0.442891	-0.30588	-0.548577	-0.48769	-0.289512	-0.356899	-0.226478	-0.198822	-0.476313	0.321029	0.25189	-0.0736715	-0.0499411	-0.165211	-0.307986	-0.0402317	0.815202
VIT_00s0174g00330	-0.516987	-0.337006	-0.413958	-0.221731	-0.424005	-0.411159	-0.602621	-0.728651	-0.539021	-0.63239	-0.699701	-0.700389	-0.672855	-0.677601	-0.68732	-0.701393	-0.62255	-0.690136	0.242092	-0.122917	-0.519159	-0.128835	0.00336498	0.0504336	0.0429114	0.172126	-0.277555	-0.0942317	-0.449027	-0.0300054	0.621484	0.489327	0.515679	0.588509	0.572592	0.505972	0.6724	0.620283	0.632169	0.705553	0.760106	0.203072	-0.0575972	-0.266715	0.259978	0.0511284	0.313628	-0.126029	-0.101477
VIT_00s0179g00030	0.00939667	-0.151997	-0.386687	-0.0357117	-0.166997	-0.350954	-0.318113	-0.15632	-0.278954	-0.262607	-0.623171	-0.690742	-0.189137	-0.440465	-0.0940563	-0.430507	-0.415719	-0.402833	-0.17434	-0.302983	-0.314413	-0.0657701	-0.358699	0.107255	-0.367416	0.104778	0.0377975	-0.0051957	-0.0399336	-0.105675	0.287018	-0.0703729	0.194469	0.152394	0.312521	-0.0996037	0.106851	0.303064	0.276122	0.502839	0.376678	-0.0950709	-0.40849	-0.681905	-0.485559	-0.59782	0.245511	-0.0844065	0.0746937
VIT_00s0179g00040	-0.633829	-0.502134	-0.458376	-0.469057	-0.403251	-0.357138	-0.474004	-0.625524	-0.562901	-0.627562	-0.325336	-0.379077	-0.644783	-0.493171	-0.843277	-0.617744	-0.648766	-0.670929	0.216566	-0.0720804	-0.309342	-0.055388	0.28727	0.0963505	0.274585	0.0504954	0.166269	0.0941718	-0.3004	0.348345	0.415646	0.563308	0.325778	0.408704	0.605092	0.666411	0.694341	0.363294	0.672084	0.580696	0.674317	0.330893	0.320376	0.195258	0.696186	0.504745	-0.0633102	-0.181939	-0.152866
VIT_00s0179g00090	-0.167533	-0.0925607	0.356845	-0.0898107	0.226537	0.286949	0.132174	0.0500332	0.329159	0.223935	0.596886	0.53988	0.34539	0.368635	-0.0241173	0.365471	0.305229	0.283282	0.174002	0.149574	0.261189	0.233098	0.570493	-0.0661006	0.657779	0.238156	-0.0616494	-0.0506244	-0.262068	-0.105865	-0.133689	0.295617	-0.0990892	-0.131976	-0.229483	0.255001	-0.16074	-0.368498	-0.19247	-0.42084	-0.324933	0.0282679	0.202198	0.547848	0.519847	0.690281	-0.0937654	0.100032	0.100967
VIT_00s0179g00100	-0.558786	-0.272306	-0.501324	-0.295051	-0.638552	-0.625187	-0.675715	-0.752689	-0.681575	-0.70318	-0.689282	-0.647695	-0.700796	-0.722933	-0.72508	-0.799151	-0.647229	-0.72277	-0.01504	-0.148109	-0.486643	-0.154583	-0.0511054	-0.0296902	-0.0481715	-0.0496423	-0.144444	-0.0115296	-0.343915	0.264969	0.535127	0.383321	0.526568	0.646002	0.59165	0.47743	0.754665	0.680242	0.60185	0.684005	0.761417	0.252518	0.105275	-0.166361	0.331901	0.0927622	0.245012	-0.0237101	-0.298489
VIT_00s0179g00110	0.442423	0.25029	0.153591	0.0681017	0.619242	0.655835	0.367703	0.706292	0.377147	0.474234	0.347563	0.332029	0.471982	0.32528	0.639988	0.492652	0.384354	0.566134	0.27985	0.163431	0.685407	0.329092	-0.0166752	-0.0976308	-0.374598	-0.256684	-0.109809	-0.368633	0.226333	-0.311679	-0.775948	-0.742206	-0.47701	-0.58729	-0.261962	-0.311724	-0.621893	-0.421151	-0.48953	-0.411776	-0.556931	-0.29103	-0.00381248	-0.00101522	-0.443851	-0.196645	-0.182863	0.0410597	0.274094
VIT_00s0179g00130	0.119482	0.0817015	0.141748	-0.120592	0.629868	0.585451	0.224041	0.236337	0.342301	0.177548	0.357831	0.403942	0.230156	0.378903	0.185454	0.414117	0.333534	0.370213	0.456512	0.140477	0.263262	0.108686	0.239869	-0.0450046	0.243269	0.0508975	-0.2786	-0.457198	-0.259571	-0.43191	-0.231059	0.0472432	-0.417683	-0.439241	-0.255769	0.0276126	-0.243843	-0.289448	-0.253614	-0.293401	-0.396829	0.0942525	0.208681	0.180837	0.216124	0.290554	-0.188875	0.0820514	0.406695
VIT_00s0179g00140	0.317104	0.322453	0.374982	0.0995766	0.581355	0.735073	0.468959	0.57654	0.456424	0.523051	0.662825	0.683727	0.512538	0.557846	0.539838	0.673026	0.581136	0.681672	0.442846	0.299666	0.615572	0.277596	0.243585	-0.169713	0.109923	-0.121459	-0.13211	-0.296214	0.120807	-0.232623	-0.647958	-0.401655	-0.476906	-0.517115	-0.433407	-0.162473	-0.511913	-0.454538	-0.607502	-0.619733	-0.650053	-0.181364	0.162377	0.417661	-0.0287491	0.252842	-0.201062	0.0767511	0.147561
VIT_00s0179g00150	0.241027	-0.00809717	0.278388	0.0848769	0.488328	0.423859	0.377322	0.451516	0.518673	0.381111	0.425958	0.367234	0.568953	0.424386	0.363453	0.490046	0.347313	0.389489	0.16276	0.0716155	0.333063	0.233109	0.193709	0.0389331	0.215716	0.144102	-0.0742029	-0.223611	-0.11966	-0.361618	-0.345156	-0.133704	-0.304992	-0.373252	-0.35237	-0.148044	-0.463357	-0.502462	-0.353776	-0.398336	-0.479943	-0.171977	-0.0491465	0.093734	-0.0711237	0.110567	-0.357937	0.0720041	0.318895
VIT_00s0179g00160	0.223629	0.0124721	0.275699	0.26059	0.168472	0.0701599	0.139347	0.0549752	0.230755	0.0685154	0.233609	0.275137	0.110913	0.360521	0.0851984	0.235206	0.214292	0.164862	0.0340755	0.0435946	-0.0117903	-0.0987464	0.0419948	-0.143765	0.206868	0.0119763	0.122204	0.143362	-0.121581	-0.240309	-0.00260406	0.126584	-0.155083	0.0418499	-0.31383	-0.114487	-0.0949449	-0.242359	-0.175956	-0.187736	-0.213061	0.132818	0.175655	0.202349	0.168256	0.152366	-0.186369	-0.00409689	0.271917
VIT_00s0179g00170	-0.341593	-0.396599	-0.0221134	0.127249	-0.496712	-0.410281	-0.25018	-0.389291	-0.212043	-0.302763	-0.382896	-0.430639	-0.441451	-0.422655	-0.428091	-0.431961	-0.435038	-0.523327	-0.0257602	-0.0120223	-0.352627	-0.0539131	-0.00404269	0.216769	0.0604169	0.145476	-0.118527	0.218369	-0.171285	0.100888	0.441873	0.322162	0.620013	0.609301	0.290835	0.252332	0.37342	0.183484	0.518519	0.329737	0.460805	0.0198418	-0.129067	-0.0628638	0.110608	0.0215625	-0.0993666	-0.209742	-0.251908
VIT_00s0179g00180	-0.120951	-0.198595	-0.286801	-0.373375	0.27702	-0.0504967	-0.21924	-0.358003	-0.0286835	-0.412843	-0.157568	-0.0671878	-0.163828	0.0879506	-0.366452	-0.137252	-0.109978	-0.228077	0.0180167	-0.360308	-0.439428	-0.295002	0.0261461	-0.0290193	0.346895	0.116306	-0.0719086	-0.356686	-0.612244	-0.297469	0.465327	0.628681	-0.16401	-0.106655	0.0128486	0.133017	0.303209	0.104139	0.262232	0.277098	0.0864702	0.51932	0.304258	-0.107486	0.491493	0.218657	-0.0226773	-0.0219787	0.516393
VIT_00s0179g00190	0.0971998	0.00625022	-0.28726	-0.396553	0.444525	0.160318	-0.0881991	-0.14831	-0.00173266	-0.246079	0.052897	0.14319	-0.045262	0.314879	-0.14291	0.0555549	0.09832	0.0137176	0.11379	-0.399006	-0.308153	-0.293943	-0.00146849	-0.118158	0.307921	0.0781281	0.162827	-0.321631	-0.367868	-0.238663	0.297644	0.454996	-0.492446	-0.397488	-0.120874	-0.0471716	0.128428	0.0218194	0.0158537	0.15608	-0.114193	0.476273	0.2908	-0.068231	0.381988	0.150488	-0.0267566	-0.0859438	0.521675
VIT_00s0179g00210	0.166208	-0.0814649	-0.48366	-0.36654	0.536153	0.283162	-0.105636	0.041524	-0.0971943	-0.310988	-0.300938	-0.229477	-0.260526	-0.00804726	-0.0630256	-0.0889546	-0.175527	-0.115158	0.355726	-0.241332	-0.0615914	-0.115365	-0.200237	-0.0374075	-0.274934	-0.232399	-0.0600164	-0.580526	-0.321935	-0.355519	-0.0361107	-0.0446214	-0.368358	-0.338772	0.124431	-0.0491044	0.0843105	0.0654617	0.122753	0.345356	0.0139868	0.294305	0.259277	-0.319713	0.0119678	-0.167025	-0.17388	-0.0694166	0.578365
VIT_00s0179g00220	0.0437006	0.10947	-0.0605771	-0.300263	0.506727	0.450858	0.132893	0.143627	0.117246	0.11482	0.272073	0.274529	0.258573	0.263694	0.111637	0.274352	0.220231	0.274452	0.263817	-0.0113357	0.17749	0.0553262	0.200999	0.00474201	0.214181	0.0954653	-0.0588913	-0.329928	-0.106204	-0.209935	-0.123792	0.080751	-0.44039	-0.515065	-0.0841363	0.0452626	-0.171672	-0.123492	-0.18677	-0.139234	-0.247682	0.0966444	0.122635	0.0839339	0.158461	0.203381	0.0706456	0.0690687	0.306459
VIT_00s0179g00240	0.494155	0.268416	0.0931501	0.0331695	0.589526	0.478774	0.274311	0.489452	0.375218	0.41908	0.350059	0.323256	0.387681	0.461009	0.539724	0.443391	0.394753	0.472379	0.0692888	-0.0497153	0.304965	0.082755	-0.107113	-0.18472	-0.135973	0.0178272	0.192759	-0.157814	0.248219	-0.238197	-0.411192	-0.369157	-0.635678	-0.673849	-0.335548	-0.392371	-0.556173	-0.405176	-0.468454	-0.331817	-0.51775	-0.155792	-0.115796	-0.217095	-0.375095	-0.295976	-0.189982	0.050954	0.377541
VIT_00s0179g00250	0.262525	0.224589	0.715482	0.308896	0.429955	0.666007	0.789102	0.708056	0.665112	0.77253	0.923334	0.859459	0.684349	0.67169	0.596009	0.866034	0.684576	0.776834	0.167321	0.426247	0.683979	0.348549	0.413141	0.13193	0.318069	0.0910528	-0.0591381	0.0654077	0.327285	-0.0989847	-0.661925	-0.306095	-0.317657	-0.450554	-0.558969	-0.176834	-0.683327	-0.723214	-0.615891	-0.879883	-0.756306	-0.336272	0.020484	0.633701	0.00296181	0.392544	-0.264022	0.101616	-0.0300131
VIT_00s0179g00260	0.45591	0.282493	0.644146	0.335845	0.626955	0.760597	0.862018	0.805762	0.756074	0.784246	0.790923	0.757433	0.636377	0.728163	0.733077	0.944572	0.735306	0.828017	0.208888	0.351296	0.569082	0.258679	0.211287	0.204255	0.174386	0.116734	-0.096778	-0.0723762	0.289316	-0.279178	-0.602294	-0.345893	-0.420201	-0.575286	-0.640123	-0.364034	-0.770699	-0.734972	-0.673683	-0.831459	-0.843321	-0.315394	-0.103596	0.349077	-0.216537	0.107472	-0.30448	0.0885769	0.165211
VIT_00s0179g00270	-0.248787	-0.29584	-0.110284	-0.203207	0.174893	0.413623	0.0871265	0.270769	0.0250274	0.218592	0.0114279	-0.229423	-0.0630545	-0.31491	0.021881	-0.000667449	-0.259689	-0.0670802	0.602335	0.358547	0.42057	0.5561	0.329927	0.345573	-0.0524435	0.273285	-0.148454	-0.253972	0.122356	0.00566467	-0.339992	-0.272171	0.100329	-0.234672	0.374717	0.309564	-0.236185	-0.183864	0.121166	0.047637	0.0898625	-0.497874	-0.374608	-0.14661	-0.241537	0.0148091	-0.0714815	-0.0365926	-0.149622
VIT_00s0179g00280	0.284843	-0.0509161	0.26535	0.122171	0.502295	0.570027	0.496249	0.739181	0.555786	0.618998	0.393813	0.208666	0.399634	0.273973	0.543146	0.513174	0.240838	0.397206	0.216584	0.224156	0.511161	0.428164	0.119356	0.293873	-0.10272	0.216758	0.014368	-0.137701	0.314473	-0.183599	-0.544356	-0.463876	-0.234654	-0.553976	-0.20635	-0.240756	-0.721851	-0.648398	-0.298056	-0.433317	-0.495873	-0.502126	-0.397953	-0.155416	-0.506194	-0.232236	-0.384512	0.0805051	0.131369
VIT_00s0179g00290	0.117496	-0.0334226	0.350064	0.485109	-0.160642	-0.108852	0.0361505	-0.0671402	0.102258	-0.0173911	-0.167715	-0.0957801	-0.0865376	-0.0493757	0.0533007	-0.0095663	0.0393724	-0.0213929	0.011997	0.0633589	-0.0878073	-0.104698	-0.154024	0.0154343	-0.150883	-0.0747255	-0.306877	0.164841	-0.165937	-0.306612	0.114267	-0.0336597	0.353952	0.484516	-0.164953	-0.104674	0.0441625	0.015098	0.0524099	-0.00812512	0.033943	0.0128699	-0.0591655	0.0321027	-0.117385	-0.132772	-0.0735564	-0.366588	0.0131391
VIT_00s0179g00300	-0.579906	0.0464524	-0.261318	-0.261083	-0.69367	-0.497313	-0.472993	-0.705447	-0.673785	-0.447991	-0.216197	-0.164137	-0.382581	-0.445598	-0.621975	-0.52273	-0.327244	-0.387111	-0.0650695	0.0762415	-0.303304	-0.169291	0.180659	-0.144199	0.245658	-0.0118807	0.0319637	0.281255	-0.00422489	0.568154	0.407587	0.434335	0.32184	0.505557	0.439671	0.535656	0.689509	0.662327	0.294409	0.349849	0.606984	0.222277	0.220692	0.317943	0.555179	0.436073	0.457741	0.235431	-0.565556
VIT_00s0179g00320	-0.5439	-0.405645	-0.484573	-0.209234	-0.60413	-0.470946	-0.472995	-0.483337	-0.682068	-0.49589	-0.652065	-0.762237	-0.651261	-0.837277	-0.63446	-0.779306	-0.824902	-0.757939	0.0601979	0.0563478	-0.21336	0.0366926	-0.0121261	0.201216	-0.290532	-0.0284806	0.0879395	0.25851	0.159414	0.45784	0.278107	0.084317	0.532019	0.509492	0.816143	0.505889	0.581888	0.529668	0.725926	0.711161	0.891994	-0.0493048	-0.0798387	-0.172794	0.0522351	-0.0471746	0.213057	-0.135213	-0.403636
VIT_00s0179g00330	-0.083567	0.155426	-0.62027	-0.201024	-0.438196	-0.5545	-0.470121	-0.522498	-0.821137	-0.652992	-0.645451	-0.493725	-0.500396	-0.449397	-0.409223	-0.675413	-0.462652	-0.479335	-0.243377	-0.290527	-0.416184	-0.478559	-0.461393	-0.210997	-0.480448	-0.44144	0.258614	0.189004	0.152782	0.349068	0.356168	0.0371398	-0.0196848	0.285798	0.434697	0.0335473	0.648434	0.769014	0.356513	0.691571	0.640351	0.400368	0.29768	-0.191664	0.0664192	-0.268397	0.396027	-0.0890269	-0.146096
VIT_00s0179g00340	-0.689777	-0.499022	-0.663341	-0.480996	-0.611574	-0.53676	-0.598535	-0.671545	-0.791916	-0.677261	-0.609267	-0.718466	-0.788964	-0.811746	-0.863847	-0.864967	-0.889677	-0.864166	0.122331	-0.0661725	-0.350212	-0.014993	0.126345	0.184416	-0.0108567	0.0457186	0.253309	0.188088	-0.0600748	0.53431	0.443293	0.375458	0.448443	0.466382	0.871083	0.652441	0.753267	0.589935	0.80447	0.818069	0.932692	0.141463	0.0797391	-0.0856247	0.379536	0.197907	0.168085	-0.0988756	-0.356536
VIT_00s0179g00350	0.00734193	-0.00379459	0.0209751	0.12017	-0.0139938	0.0930787	0.306003	0.191013	0.0130758	0.125021	-0.158197	-0.221091	0.0657615	-0.159994	0.140377	0.127311	-0.0348615	0.063251	0.106373	0.16527	0.0255862	0.08181	-0.0669079	0.460897	-0.137259	0.161614	-0.124819	0.0738789	0.156317	-0.0120805	-0.00636296	-0.122561	0.168006	0.0445389	0.0723938	-0.0492713	-0.12512	0.0273125	-0.0594648	0.0115645	0.025416	-0.244195	-0.371911	-0.175746	-0.347358	-0.255101	0.123664	0.0161247	-0.155153
VIT_00s0179g00360	-0.234828	0.0116141	-0.0194601	0.011448	-0.282992	-0.386199	-0.446772	-0.591539	-0.111597	-0.409084	-0.359178	-0.178128	-0.206288	-0.18751	-0.358294	-0.307964	-0.0539935	-0.266636	-0.117485	-0.205695	-0.492138	-0.273237	-0.0675021	-0.233711	0.193121	0.0129858	-0.495928	-0.204569	-0.641546	-0.242132	0.550157	0.490941	0.389616	0.535416	-0.00669352	0.194165	0.482457	0.456916	0.223072	0.220006	0.266329	0.34882	0.147784	-0.0516195	0.342165	0.135782	0.231741	0.0741372	0.0293141
VIT_00s0179g00370	-0.610149	-0.598696	-0.270003	-0.231205	-0.519082	-0.521773	-0.397791	-0.669993	-0.406967	-0.603482	-0.425655	-0.460813	-0.620349	-0.498755	-0.844573	-0.62161	-0.651631	-0.773006	-0.00549005	-0.0895342	-0.54033	-0.186235	0.159464	0.26102	0.318817	0.137247	0.0452832	0.204718	-0.371192	0.28756	0.675004	0.720719	0.604896	0.613448	0.506299	0.541576	0.724281	0.334227	0.823282	0.564229	0.701057	0.329002	0.185613	0.1058	0.607331	0.373371	-0.0851282	-0.192656	-0.187016
VIT_00s0181g00010	-0.7195	-0.459961	-0.441434	-0.316832	-0.622529	-0.437061	-0.388319	-0.521285	-0.594379	-0.479244	-0.575025	-0.693451	-0.622606	-0.824593	-0.697354	-0.682365	-0.755669	-0.726259	0.127509	0.104369	-0.273352	0.104105	0.157647	0.389978	-0.00325839	0.137342	-0.0978551	0.0930221	-0.0753397	0.451617	0.414695	0.306427	0.710634	0.550072	0.77678	0.610561	0.615187	0.543728	0.737527	0.633861	0.821322	-0.0506305	-0.132107	-0.0686417	0.20928	0.153016	0.295502	-0.00240594	-0.51655
VIT_00s0181g00020	-0.537337	-0.192092	-0.145696	-0.26963	-0.320928	-0.174417	-0.212773	-0.34807	-0.241388	-0.251289	-0.0363807	-0.0388041	-0.233278	-0.27809	-0.47956	-0.260564	-0.267004	-0.303606	0.0817664	0.06597	-0.0524867	0.0746258	0.337556	0.0304159	0.291889	0.00606987	-0.195505	-0.0778939	-0.15933	0.314959	0.133967	0.323856	0.305408	0.279734	0.320927	0.514752	0.426541	0.255001	0.328477	0.149729	0.356328	0.0910592	0.266948	0.373799	0.54818	0.548535	0.0494181	0.19312	-0.329878
VIT_00s0181g00030	-0.159212	0.00507033	-0.513844	-0.193262	-0.320922	-0.502156	-0.571692	-0.523865	-0.442769	-0.566904	-0.769017	-0.61909	-0.450793	-0.502796	-0.369844	-0.614009	-0.412189	-0.533015	-0.241593	-0.302226	-0.572772	-0.362226	-0.449524	-0.125846	-0.35468	-0.215634	-0.230893	-0.219869	-0.261952	0.0687188	0.519484	0.178143	0.305491	0.353614	0.34213	0.043337	0.568079	0.680561	0.439797	0.606832	0.539325	0.290654	0.0359744	-0.50107	-0.0576002	-0.379233	0.275121	0.0316898	-0.0399629
VIT_00s0181g00040	-0.494878	-0.219088	-0.511281	-0.527153	-0.104127	-0.0156051	-0.511065	-0.431258	-0.42296	-0.468323	-0.437281	-0.418231	-0.541666	-0.5487	-0.516612	-0.494277	-0.469951	-0.446021	0.464111	0.0541788	-0.118768	0.0977739	0.133375	-0.0438598	-0.0256035	-0.0923724	-0.351513	-0.515865	-0.380154	0.0932779	0.139233	0.163983	0.247005	0.155987	0.549906	0.536478	0.489312	0.431225	0.423288	0.451012	0.462099	0.137168	0.182283	-0.118836	0.313126	0.213533	0.122408	0.0896592	-0.094668
VIT_00s0181g00050	0.0580399	0.106634	0.495971	0.383795	-0.0959682	0.157354	0.388989	0.325141	0.241719	0.432633	0.471098	0.410481	0.360999	0.226248	0.264237	0.330873	0.256905	0.310205	-0.0447412	0.340657	0.4255	0.194969	0.211586	-0.00394082	0.0437371	-0.0407146	0.0446975	0.388488	0.416676	0.171963	-0.393558	-0.281275	0.0276308	0.0389855	-0.199636	-0.0368976	-0.273617	-0.309024	-0.242761	-0.439525	-0.202916	-0.288961	-0.00222103	0.504416	-0.0323653	0.226004	-0.148754	-0.146461	-0.293333
VIT_00s0181g00060	0.0483367	0.138212	0.37012	-0.0179469	0.478321	0.748487	0.382541	0.494154	0.426262	0.545005	0.671974	0.591781	0.32291	0.366444	0.386636	0.563146	0.423875	0.550918	0.56336	0.417976	0.682738	0.480606	0.484911	-0.0330029	0.241517	0.103501	-0.237615	-0.318879	0.098949	-0.172374	-0.646179	-0.307583	-0.296976	-0.472568	-0.238193	0.104438	-0.509792	-0.497395	-0.433966	-0.592371	-0.531857	-0.328119	0.0204082	0.425051	0.0503806	0.404817	-0.203208	0.0234905	0.0156338
VIT_00s0181g00080	0.712268	0.347158	0.522692	0.421729	0.636564	0.605	0.83574	0.890912	0.746456	0.715412	0.579789	0.601438	0.686646	0.729183	0.875054	0.860484	0.71437	0.790404	-0.0414995	0.131563	0.477971	0.104227	-0.151036	0.11353	-0.180765	-0.0999664	0.01793	-0.074889	0.326231	-0.351564	-0.609458	-0.56398	-0.50341	-0.59698	-0.706953	-0.677915	-0.808283	-0.687669	-0.687409	-0.711869	-0.862169	-0.260774	-0.118559	0.065534	-0.509927	-0.291389	-0.372419	-0.00607719	0.298011
VIT_00s0181g00100	0.538069	0.358655	0.638429	0.45579	0.537436	0.654005	0.60715	0.841887	0.734693	0.856694	0.656706	0.592139	0.706035	0.572975	0.879785	0.798775	0.690558	0.801695	0.0847505	0.278926	0.682669	0.382836	0.0780059	-0.0619145	-0.110907	0.0689702	-0.166588	-0.0776116	0.393676	-0.343099	-0.740797	-0.668774	-0.374171	-0.526518	-0.591087	-0.460843	-0.893536	-0.676461	-0.727699	-0.792392	-0.792101	-0.536184	-0.318028	0.0852202	-0.577604	-0.196424	-0.197896	0.0729235	0.119617
VIT_00s0181g00120	0.484123	0.241582	0.620928	0.329233	0.544351	0.619477	0.883543	0.788642	0.701092	0.684766	0.825976	0.829663	0.700448	0.787456	0.67404	0.894132	0.719108	0.792956	0.0493092	0.266691	0.569898	0.164574	0.168444	0.156076	0.151946	-0.0718168	0.0918933	0.0443722	0.269497	-0.191882	-0.615886	-0.344641	-0.456646	-0.52325	-0.672906	-0.418239	-0.689545	-0.745016	-0.633147	-0.807395	-0.840334	-0.167014	0.117223	0.502335	-0.0788269	0.18754	-0.395194	0.0247445	0.174869
VIT_00s0181g00130	0.293728	0.535535	-0.399538	-0.100615	-0.118605	-0.405421	-0.31734	-0.439477	-0.493029	-0.544797	-0.320868	0.033203	-0.17199	0.168285	-0.13352	-0.253382	0.104904	-0.052704	-0.399113	-0.443331	-0.565665	-0.808065	-0.595043	-0.53387	-0.243215	-0.551057	0.236475	0.040704	-0.0690883	0.106811	0.430077	0.216573	-0.416234	0.0691019	-0.158657	-0.326456	0.536702	0.640257	-0.0866807	0.33881	0.145346	0.738775	0.574983	-0.0350664	0.250917	-0.195557	0.274557	0.0458379	0.15583
VIT_00s0181g00140	-0.00239808	0.301533	-0.172904	-0.170075	-0.118233	-0.218984	-0.136321	-0.438166	-0.386119	-0.463092	0.0560935	0.339064	-0.105089	0.258598	-0.3248	-0.107001	0.12471	-0.00985776	-0.136089	-0.204266	-0.337676	-0.586773	-0.0992779	-0.370967	0.208562	-0.425069	0.199558	0.0939353	-0.166376	0.199069	0.311516	0.441166	-0.309094	0.113719	-0.132081	0.0378169	0.55674	0.391045	-0.0157857	0.122837	0.0944092	0.727337	0.790448	0.511142	0.740111	0.436391	0.110761	0.0116191	0.0533317
VIT_00s0181g00150	0.232406	0.00631956	0.217042	-0.00619135	0.462449	0.369873	0.250548	0.40583	0.449446	0.307091	0.480171	0.456831	0.4025	0.471913	0.318734	0.432347	0.351645	0.375255	0.106741	0.0330406	0.350383	0.196006	0.186549	-0.0965626	0.198823	-0.00368894	0.0606669	-0.236574	-0.143241	-0.251853	-0.344697	-0.122209	-0.310647	-0.400933	-0.374354	-0.171086	-0.424786	-0.512716	-0.319735	-0.420136	-0.533392	-0.0471754	0.122059	0.16498	0.0402576	0.174527	-0.35934	0.026863	0.285148
VIT_00s0181g00160	0.177586	0.17999	-0.0648165	0.0269755	0.00910649	-0.230297	-0.162564	-0.190383	0.0815543	-0.138949	-0.247747	-0.104508	0.0214862	0.0925008	0.0581412	-0.019177	0.156295	-0.00177398	-0.346619	-0.411227	-0.472735	-0.338661	-0.346918	-0.119111	0.0055466	0.0720845	-0.156145	-0.165224	-0.336797	-0.239782	0.429196	0.256679	0.00307625	0.0643208	-0.233904	-0.291307	0.0788006	0.196949	-0.0758315	0.0653222	-0.0917708	0.233112	-0.115046	-0.385386	-0.119104	-0.328522	0.123349	0.228132	0.199886
VIT_00s0181g00170	-0.0907392	-0.124566	-0.0283297	-0.0399502	0.0607672	-0.129494	-0.22099	-0.292484	0.147756	-0.157876	-0.281055	-0.267459	-0.164065	-0.0715005	-0.166403	-0.101504	-0.0577377	-0.209441	-0.00675861	-0.25339	-0.485779	-0.146675	-0.0620916	0.0680275	0.259461	0.381388	-0.33318	-0.268774	-0.530375	-0.380494	0.550655	0.492994	0.238675	0.148476	-0.0339288	0.040426	0.112341	0.117225	0.190207	0.151423	0.0856054	0.117933	-0.256838	-0.405924	0.010878	-0.123936	0.118052	0.161104	0.231251
VIT_00s0181g00180	-0.274315	0.0476076	-0.0101599	-0.257373	0.0617617	0.179321	0.00580345	0.00248677	0.0352431	0.155094	0.150833	0.0472725	0.0869788	-0.113907	-0.00420504	0.102793	0.0713455	0.149704	0.246885	0.152845	0.170057	0.305573	0.347603	0.183698	0.308784	0.365989	-0.240991	-0.260376	-0.114092	-0.0433359	-0.0631254	0.103416	0.0168391	-0.168819	0.106435	0.295483	-0.139023	0.00592849	-0.159261	-0.164209	-0.0720697	-0.234967	-0.26327	-0.0278944	0.036086	0.206666	0.30634	0.889284	-0.139609
VIT_00s0181g00190	-0.145069	-0.10339	-0.24311	-0.318551	0.269592	0.228912	-0.0613842	0.10544	-0.0239859	0.0193632	-0.0889655	-0.208103	0.00588681	-0.206534	0.0286305	-0.0250926	-0.129274	0.0115248	0.330645	-0.0316988	0.208575	0.345832	0.189928	0.196836	0.00192282	0.264406	-0.163998	-0.401867	-0.169424	-0.258872	-0.141088	-0.10341	-0.125021	-0.310033	0.237172	0.18122	-0.182165	-0.015516	-0.0183149	0.111046	-0.00155487	-0.212632	-0.266281	-0.302268	-0.178529	-0.0452578	0.231874	0.0234795	0.174901
VIT_00s0181g00200	-0.189789	0.0405158	-0.0471469	-0.206603	0.0165688	0.0742759	-0.00740723	0.0347545	0.0297703	0.116898	0.0512734	-0.0235638	0.0938908	-0.130446	0.0204196	0.0490695	0.033683	0.0980592	0.0743344	0.0809355	0.1096	0.218973	0.190461	0.182876	0.13613	0.24426	-0.18882	-0.20642	-0.0487065	-0.00097664	-0.0423961	0.0328769	0.0470468	-0.122981	0.10341	0.183896	-0.112617	0.0314565	-0.0890481	-0.108728	-0.0372671	-0.194035	-0.2411	-0.106646	-0.0574692	0.0502495	0.224048	0.899741	-0.116686
VIT_00s0181g00210	-0.177279	-0.23486	-0.324469	-0.449288	0.24904	0.210887	-0.000847158	0.223849	0.00589911	0.179883	0.000976866	-0.273458	0.0771239	-0.219438	0.0579315	-0.0169752	-0.209275	-0.0427916	0.153963	-0.0733875	0.19225	0.445069	0.241963	0.323961	0.101012	0.502305	0.100296	-0.270823	0.0574208	0.00129789	-0.141022	-0.099385	-0.14538	-0.506934	0.304412	0.135664	-0.348695	-0.187877	-0.00112008	0.0982078	-0.0254705	-0.423352	-0.553592	-0.478797	-0.334868	-0.164009	0.0709316	0.193895	0.0587046
VIT_00s0181g00220	-0.060219	0.00231353	0.30087	0.0640176	0.109969	0.4141	0.541482	0.378261	0.252038	0.321895	0.416355	0.397909	0.0491307	0.177191	0.161116	0.407755	0.225691	0.307187	0.314906	0.465757	0.398876	0.23185	0.282771	0.342873	0.114702	-0.0778759	-0.154382	-0.0392918	0.196806	0.166857	-0.380481	-0.161218	0.0475678	-0.12664	-0.125668	0.0753475	-0.186416	-0.316515	-0.148865	-0.405066	-0.288186	-0.167964	0.115583	0.497584	0.149242	0.343891	-0.25116	-0.0291166	-0.263671
VIT_00s0181g00230	0.501245	0.317899	0.168292	0.249044	0.158935	-0.130985	-0.0758287	-0.0960265	0.150094	-0.101386	0.165521	0.394057	0.215428	0.581626	0.159188	0.161299	0.410384	0.216035	-0.332566	-0.320523	-0.302086	-0.524175	-0.33343	-0.541579	0.0613711	-0.27218	0.327507	0.165779	-0.171825	-0.236002	0.195753	0.178038	-0.426399	-0.032979	-0.560217	-0.472368	0.0405932	-0.0336282	-0.284546	-0.1305	-0.308284	0.520519	0.424416	0.0918279	0.187738	-0.0709735	-0.0884754	-0.182606	0.437212
VIT_00s0181g00240	0.782595	0.34296	0.31663	0.463519	0.456647	0.165653	0.404919	0.507624	0.52479	0.417038	0.168854	0.220711	0.517706	0.569008	0.72639	0.507855	0.534108	0.500015	-0.368762	-0.285587	0.0112981	-0.168414	-0.449116	-0.0916104	-0.258741	0.0144822	0.142236	0.0478704	0.15236	-0.501532	-0.158464	-0.349664	-0.458107	-0.385456	-0.648589	-0.799366	-0.608223	-0.38136	-0.543198	-0.341792	-0.598702	-0.101391	-0.291315	-0.389764	-0.661631	-0.648966	-0.0988317	-0.0938497	0.485497
VIT_00s0181g00250	0.518538	0.242938	-0.271072	0.0343815	0.382145	-0.023204	0.0553864	0.0995104	0.0234526	-0.135676	-0.309107	-0.17928	-0.00755049	0.222675	0.253942	0.0439977	0.0954465	0.0430071	-0.267445	-0.471477	-0.344632	-0.425333	-0.572876	-0.0665107	-0.375132	-0.135777	0.116042	-0.198051	-0.040163	-0.375109	0.200979	-0.053658	-0.434045	-0.314294	-0.217093	-0.552012	-0.0754739	0.119003	-0.0977084	0.232619	-0.116823	0.261333	-0.0237798	-0.533785	-0.380868	-0.610085	0.105204	-0.104948	0.541955
VIT_00s0181g00260	-0.144545	-0.148221	0.00702477	-0.30811	0.594422	0.744673	0.281366	0.377369	0.369466	0.308219	0.207006	0.0772494	0.1366	0.0253323	0.183358	0.37976	0.116144	0.259934	0.741607	0.2701	0.383431	0.497661	0.396735	0.361497	0.222738	0.343375	-0.502271	-0.701429	-0.255811	-0.347789	-0.303645	-0.0740141	-0.0701076	-0.469365	0.0515576	0.23186	-0.364529	-0.319159	-0.128455	-0.225089	-0.304457	-0.321233	-0.26514	-0.0806949	-0.0828899	0.172283	-0.118876	0.193761	0.152802
VIT_00s0184g00010	-0.101755	0.0457428	-0.293389	0.0189733	-0.53333	-0.617172	-0.395786	-0.475273	-0.485631	-0.428825	-0.591009	-0.481266	-0.352489	-0.405661	-0.306405	-0.50613	-0.324624	-0.424252	-0.450662	-0.193593	-0.545513	-0.418376	-0.440286	-0.030975	-0.291225	-0.177303	0.0767144	0.303174	0.0721103	0.339872	0.525882	0.168045	0.342024	0.46654	0.251504	-0.0525568	0.502795	0.583746	0.336542	0.463771	0.48638	0.240527	-0.0340674	-0.293463	-0.0848335	-0.367805	0.302648	-0.148049	-0.266914
VIT_00s0184g00020	0.123145	0.00631645	0.181652	0.0963328	-0.0871726	-0.0307521	0.287131	0.170321	0.0587447	0.136402	0.364684	0.356038	0.118427	0.30367	0.0637501	0.169413	0.137908	0.118465	-0.219883	0.111539	0.102939	-0.09269	0.0373909	0.0413834	0.0867586	-0.163752	0.500724	0.419568	0.323889	0.346674	-0.129833	-0.0214877	-0.116869	-0.0877184	-0.173313	-0.149575	-0.075349	-0.269615	-0.0723758	-0.236358	-0.178674	0.083672	0.23055	0.388777	0.162159	0.169397	-0.215682	-0.105816	-0.127444
VIT_00s0184g00030	0.0168616	0.195543	0.605164	0.264912	0.0355255	0.412294	0.506103	0.473309	0.427461	0.738381	0.703338	0.579695	0.435582	0.303595	0.409486	0.561761	0.435338	0.50288	0.0261275	0.593	0.527547	0.370166	0.368001	0.102551	0.220301	0.170084	-0.0403701	0.268156	0.565472	0.349606	-0.491272	-0.289371	0.0194453	-0.22751	-0.254657	-0.0114371	-0.486617	-0.462461	-0.40438	-0.706572	-0.416244	-0.502555	-0.221122	0.453108	-0.11286	0.2518	-0.119801	0.164145	-0.461339
VIT_00s0184g00040	-0.513177	-0.397223	-0.758291	-0.576906	-0.288741	-0.337766	-0.589446	-0.594704	-0.733437	-0.656243	-0.641434	-0.727543	-0.698935	-0.693444	-0.705874	-0.759836	-0.770712	-0.723739	0.224432	-0.194579	-0.380678	-0.0667813	0.0174051	0.116437	-0.0516681	0.104216	0.175022	-0.0644398	-0.182281	0.264147	0.457389	0.353783	0.187778	0.193435	0.775621	0.503551	0.611953	0.55499	0.647339	0.833408	0.773968	0.192399	-0.00848297	-0.341516	0.231071	0.00907015	0.233814	-0.119907	-0.0681175
VIT_00s0184g00050	-0.494997	-0.242727	-0.603842	-0.367681	-0.589746	-0.588637	-0.713391	-0.673197	-0.752157	-0.643143	-0.672438	-0.704111	-0.59248	-0.748668	-0.65327	-0.838778	-0.700397	-0.705918	-0.0136726	-0.179425	-0.364979	-0.0781955	-0.0592535	-0.0889099	-0.15039	-0.0232024	0.10663	0.0879676	-0.149668	0.304607	0.418688	0.215177	0.370395	0.47195	0.704443	0.451976	0.647306	0.683561	0.56717	0.754483	0.807095	0.139718	-0.00539413	-0.276184	0.155455	-0.0318747	0.400523	-0.176813	-0.244478
VIT_00s0184g00110	-0.618282	-0.390483	-0.446076	-0.232063	-0.754395	-0.643234	-0.516266	-0.659505	-0.745174	-0.587595	-0.557618	-0.626183	-0.632501	-0.741643	-0.778922	-0.804942	-0.783057	-0.79546	-0.107478	0.0235672	-0.380566	-0.126703	0.0289626	0.139033	-0.0602178	-0.0309378	0.227549	0.422421	0.11145	0.623484	0.467168	0.343634	0.551531	0.610548	0.745936	0.53633	0.739253	0.579398	0.753223	0.678533	0.910312	0.134682	0.0889967	0.0196293	0.327368	0.151288	0.237545	-0.0508658	-0.490691
VIT_00s0184g00120	-0.491573	-0.370173	-0.355675	-0.494237	0.0913612	0.310866	-0.151187	0.0508324	-0.159764	0.0146309	-0.0881026	-0.353005	-0.232935	-0.49576	-0.223127	-0.19511	-0.424636	-0.215675	0.66905	0.267346	0.356203	0.61946	0.476337	0.290787	0.0867428	0.352428	-0.117064	-0.370608	-0.0318076	0.0721539	-0.244883	-0.112793	0.136811	-0.203408	0.607286	0.572287	-0.0566579	0.000669833	0.240507	0.220659	0.273494	-0.432103	-0.327979	-0.164429	-0.0506934	0.187842	0.132019	0.122178	-0.154341
VIT_00s0184g00180	0.306162	0.210735	-0.100053	0.0870949	0.245402	0.0517546	-0.0512739	0.0970037	0.0939898	0.0188152	-0.268269	-0.195951	0.0289065	0.00398093	0.258607	0.0170604	0.0929884	0.0825419	-0.0656139	-0.143438	-0.122544	-0.125605	-0.36444	-0.0537105	-0.357511	-0.0177797	-0.184262	-0.260378	-0.0435354	-0.361996	0.0532162	-0.168474	-0.163795	-0.169515	-0.108299	-0.305577	-0.145478	0.112115	-0.0974513	0.0890707	-0.0704514	0.00344532	-0.205336	-0.51795	-0.435248	-0.518752	0.154116	0.183877	0.285152
VIT_00s0184g00200	-0.177621	-0.233299	-0.0678414	-0.174255	-0.0639788	-0.13436	-0.0768003	-0.188808	-0.0502459	-0.241776	0.137655	0.157981	-0.0926114	0.127182	-0.323659	-0.0666698	-0.0758815	-0.159813	0.0383986	-0.0556722	-0.14654	-0.0796323	0.219678	-0.0118694	0.41339	0.0071859	0.212071	0.0180161	-0.324796	0.0822192	0.212228	0.420331	0.0181322	0.118923	-0.0163592	0.179718	0.24579	-0.0475164	0.172664	0.0681302	0.0407239	0.304398	0.353391	0.330507	0.555809	0.461522	-0.249526	-0.049546	0.0491313
VIT_00s0184g00210	-0.170957	-0.19982	-0.341282	-0.406733	0.0802464	0.0587344	-0.0979374	-0.0908482	-0.295009	-0.371558	0.0729885	0.127905	-0.179603	-0.00386106	-0.363903	-0.180645	-0.227817	-0.155941	0.242142	-0.0249683	0.197378	-0.0225397	0.194978	-0.143347	0.00353505	-0.453976	0.282432	-0.108908	-0.119401	0.19117	-0.211859	0.0296547	-0.238236	-0.0664667	0.237693	0.301781	0.33262	0.0498037	0.230306	0.208051	0.160305	0.391023	0.733708	0.480342	0.617386	0.517706	-0.272997	-0.128504	0.141513
VIT_00s0184g00230	-0.279247	-0.221589	-0.51592	-0.486887	0.0307432	-0.0644407	-0.367013	-0.350683	-0.474421	-0.545632	-0.238808	-0.189804	-0.351731	-0.239678	-0.505341	-0.409009	-0.399053	-0.349431	0.272334	-0.154152	-0.0574889	-0.0968988	0.118892	-0.144655	0.0150262	-0.251892	0.130099	-0.204856	-0.265756	0.0579998	0.0852963	0.208124	-0.138688	0.0218887	0.413061	0.395479	0.472667	0.301333	0.357043	0.465925	0.394984	0.402975	0.51221	0.139959	0.518114	0.339596	0.0539512	-0.162985	0.213195
VIT_00s0186g00010	0.534343	0.321046	0.0673019	0.275317	0.152725	0.0369043	0.189882	0.314804	0.0958533	0.185038	0.0156981	0.1042	0.0990382	0.275883	0.442134	0.191839	0.237711	0.237414	-0.303971	-0.0857269	-0.0028002	-0.239631	-0.477951	-0.170271	-0.446669	-0.300187	0.275247	0.170779	0.399169	0.048713	-0.159076	-0.403234	-0.29613	-0.227376	-0.307676	-0.603993	-0.251465	-0.10415	-0.272979	-0.119229	-0.282514	0.00732886	-0.0234081	-0.198001	-0.456565	-0.525405	-0.0659954	-0.28406	0.0772329
VIT_00s0186g00020	0.411734	0.15103	-0.0740023	-0.0663292	0.475213	0.351799	0.149704	0.555966	0.366568	0.406768	0.143063	0.0459917	0.322557	0.218754	0.541667	0.291527	0.216354	0.310053	0.00183498	-0.0790858	0.310843	0.261441	-0.152428	-0.0458701	-0.299399	0.060962	0.160947	-0.296132	0.219864	-0.183936	-0.438738	-0.525129	-0.415586	-0.629084	-0.171169	-0.387114	-0.590532	-0.35172	-0.361906	-0.209784	-0.421801	-0.352273	-0.355236	-0.495476	-0.631532	-0.502961	-0.173432	0.0781812	0.281424
VIT_00s0186g00080	-0.315758	-0.310164	0.0173453	-0.352738	0.0483475	0.218683	0.0962802	0.233349	0.111025	0.256003	0.529859	0.298819	0.200634	0.0674647	-0.0856201	0.118542	-0.067938	0.0477973	0.156692	0.254909	0.498855	0.502024	0.584095	0.106849	0.376336	0.153067	0.361712	0.0524939	0.165157	0.392158	-0.408556	-0.0567522	-0.0589769	-0.319674	0.171916	0.340938	-0.221055	-0.431973	0.00714404	-0.254946	-0.129538	-0.263828	0.0605726	0.391449	0.282654	0.528224	-0.255693	0.0719571	-0.1903
VIT_00s0186g00090	-0.500643	-0.306225	-0.372525	-0.106207	-0.695257	-0.714628	-0.635406	-0.780744	-0.577266	-0.637103	-0.72328	-0.68988	-0.64476	-0.686123	-0.710626	-0.801618	-0.651511	-0.791443	-0.20078	-0.162256	-0.643546	-0.285154	-0.159294	0.0181634	-0.0579991	0.0230947	-0.0715909	0.207057	-0.222628	0.296508	0.727843	0.483165	0.664935	0.726062	0.552016	0.377432	0.773121	0.686644	0.742784	0.705275	0.844105	0.242247	-0.00715716	-0.222221	0.229857	-0.045892	0.294656	-0.107967	-0.313495
VIT_00s0187g00010	0.480262	0.553557	0.433894	0.255547	0.343767	0.358622	0.472347	0.404827	0.353858	0.38713	0.681815	0.844711	0.531835	0.756155	0.508127	0.656093	0.739693	0.731373	-0.0724108	0.130431	0.35059	-0.119107	0.0313281	-0.323116	0.113574	-0.287404	0.143173	0.0651412	0.195858	-0.0938969	-0.441178	-0.226556	-0.582244	-0.34851	-0.659045	-0.375932	-0.351575	-0.312258	-0.695869	-0.639455	-0.665486	0.136597	0.409671	0.552134	0.149885	0.24754	-0.0665258	0.138867	0.141293
VIT_00s0187g00020	-0.538273	-0.762086	-0.332228	-0.283459	-0.328044	-0.234458	-0.123573	-0.0690629	-0.246995	-0.206329	-0.314799	-0.591131	-0.45503	-0.636361	-0.512222	-0.486634	-0.780708	-0.666832	0.0845991	0.0570129	0.0475925	0.348381	0.265489	0.595948	-0.0516985	0.197824	0.212065	0.172702	0.0981052	0.382899	0.0648182	0.0733504	0.529937	0.224101	0.702147	0.480581	0.206025	-0.0374891	0.760141	0.452721	0.570901	-0.255674	-0.207816	-0.101898	0.0349002	0.0961851	-0.282388	-0.151486	-0.262848
VIT_00s0187g00030	0.377164	0.315275	0.488112	0.279652	0.371631	0.40358	0.655768	0.45933	0.4384	0.433589	0.604979	0.685107	0.630254	0.650342	0.468823	0.687223	0.624395	0.642289	-0.0571109	0.142714	0.285287	-0.0618918	0.0695122	0.082229	0.186925	-0.0856081	0.0398524	0.119168	0.195588	-0.131191	-0.303416	-0.106571	-0.384317	-0.325194	-0.573735	-0.335752	-0.393025	-0.415742	-0.528375	-0.59747	-0.60402	0.0346791	0.17687	0.472252	0.0536665	0.188558	-0.182374	0.164072	0.127564
VIT_00s0187g00040	-0.574302	-0.602816	-0.151467	-0.327517	-0.288485	-0.237369	-0.299422	-0.380899	-0.115948	-0.287452	-0.017534	-0.150896	-0.361365	-0.258442	-0.643906	-0.341943	-0.452777	-0.516287	0.0931113	0.0232547	-0.174026	0.13133	0.440963	0.18146	0.491053	0.249808	0.1754	0.112835	-0.279279	0.303872	0.315563	0.571024	0.417939	0.283717	0.385461	0.579378	0.383349	-0.0260002	0.594685	0.241099	0.390604	0.116418	0.151124	0.234069	0.607844	0.549344	-0.262434	-0.0562218	-0.146108
VIT_00s0187g00050	0.264428	0.0738124	-0.219413	0.180544	-0.034658	-0.23721	-0.136493	-0.0472667	-0.0982191	-0.173745	-0.603505	-0.543061	-0.131365	-0.251597	0.143137	-0.237312	-0.145034	-0.183082	-0.181543	-0.334141	-0.334661	-0.212056	-0.567281	0.0595868	-0.519729	-0.0542434	-0.188579	-0.144756	-0.0847289	-0.329614	0.254937	-0.186984	0.107162	0.13928	0.0261434	-0.365682	0.0253406	0.306514	0.0877211	0.359126	0.161063	-0.0225066	-0.347472	-0.687618	-0.601553	-0.752726	0.173424	-0.0418812	0.166618
VIT_00s0187g00110	0.0520281	-0.0301075	0.398054	0.181334	0.16412	0.377516	0.507047	0.634496	0.543418	0.769256	0.473391	0.207508	0.424744	0.151711	0.506523	0.519214	0.261595	0.389034	-0.00298489	0.345025	0.489452	0.574478	0.313364	0.398996	0.127225	0.508949	-0.00165917	0.115587	0.477243	0.0939917	-0.465199	-0.359374	0.0241089	-0.38578	-0.148375	-0.0956165	-0.720958	-0.584089	-0.341438	-0.536369	-0.412611	-0.75704	-0.681054	-0.0800389	-0.523831	-0.119273	-0.15667	0.130542	-0.256569
VIT_00s0187g00120	0.602294	0.484939	0.676018	0.44216	0.6077	0.637622	0.647314	0.732929	0.735398	0.738822	0.739837	0.803655	0.823312	0.790962	0.853463	0.905965	0.880405	0.920367	0.0342046	0.171786	0.545466	0.16795	0.0604098	-0.137278	0.0784629	-0.0176203	-0.189964	-0.131991	0.163782	-0.457497	-0.591552	-0.442427	-0.506462	-0.509317	-0.79096	-0.517374	-0.781081	-0.61244	-0.852706	-0.85441	-0.914959	-0.238322	-0.0580449	0.272736	-0.307407	-0.0216332	-0.147224	0.0928717	0.259887
VIT_00s0187g00130	0.329159	0.527437	0.643628	0.355842	0.420426	0.626852	0.510456	0.562288	0.605813	0.700141	0.639778	0.696417	0.733828	0.535506	0.724046	0.792339	0.806222	0.861107	0.211441	0.352687	0.549714	0.288538	0.192913	-0.113622	0.144153	0.0733088	-0.480199	-0.246567	0.0940845	-0.367265	-0.539505	-0.394029	-0.255129	-0.338755	-0.60647	-0.252752	-0.637757	-0.377689	-0.808502	-0.811788	-0.745691	-0.347519	-0.167252	0.291206	-0.256186	0.0904055	0.113753	0.288796	-0.00770718
VIT_00s0187g00150	-0.339082	-0.239693	-0.0202798	-0.379837	0.279273	0.588963	0.237479	0.385338	0.178209	0.376606	0.300077	0.0736038	-0.0018606	-0.150885	0.0557281	0.244182	-0.0718244	0.127393	0.532105	0.43852	0.512148	0.618579	0.50915	0.428301	0.169438	0.271429	-0.216812	-0.356012	0.172492	0.246684	-0.433102	-0.193356	0.0869651	-0.404627	0.278469	0.372883	-0.305247	-0.338345	0.00748114	-0.229378	-0.145471	-0.473558	-0.263852	0.100771	-0.0363574	0.280423	-0.196478	0.217437	-0.266286
VIT_00s0187g00160	-0.447545	-0.504673	-0.421021	-0.30787	-0.498229	-0.389534	-0.292685	-0.207469	-0.508565	-0.335513	-0.247603	-0.411284	-0.437075	-0.528361	-0.545407	-0.577043	-0.71616	-0.624035	-0.07692	0.0978317	0.0295078	0.125748	0.127467	0.155301	-0.150356	-0.161489	0.538529	0.394779	0.306648	0.702108	-0.0126806	-0.0164823	0.308701	0.245608	0.668578	0.412634	0.390052	0.128546	0.613869	0.461902	0.615631	-0.0366766	0.155839	0.116485	0.215374	0.163681	-0.175923	-0.272478	-0.380766
VIT_00s0187g00170	-0.144873	0.0705775	0.466179	0.115701	-0.0652749	0.407256	0.49503	0.50504	0.252884	0.672989	0.748393	0.56196	0.323258	0.176089	0.295912	0.462331	0.265557	0.422599	0.163574	0.649134	0.735419	0.549197	0.530856	0.174201	0.210202	0.0925532	0.115859	0.306598	0.660152	0.536401	-0.683328	-0.404429	0.0137103	-0.230354	-0.0598144	0.166734	-0.442297	-0.485236	-0.339751	-0.644221	-0.331146	-0.572065	-0.11452	0.631895	-0.00221755	0.434981	-0.206452	0.0860429	-0.595922
VIT_00s0187g00190	-0.0474965	0.240439	-0.0102626	0.20752	-0.503876	-0.527162	-0.222073	-0.43135	-0.268129	-0.31042	-0.370422	-0.158366	-0.291238	-0.189483	-0.185869	-0.281358	-0.0261861	-0.191986	-0.369185	-0.0567896	-0.457812	-0.40606	-0.334425	-0.155287	-0.151216	-0.228531	-0.198586	0.179794	-0.0944609	0.16695	0.41741	0.183302	0.341143	0.556311	-0.0316534	-0.0637808	0.465021	0.53215	0.121781	0.197725	0.283032	0.268722	0.130336	-0.00985223	0.0943637	-0.120819	0.234735	-0.0801776	-0.277437
VIT_00s0187g00200	0.257386	0.0750576	-0.070113	-0.182303	0.298441	0.24851	0.250813	0.469279	0.197495	0.366608	0.325285	0.178417	0.310805	0.25086	0.382229	0.302761	0.187842	0.31413	-0.08328	0.0291364	0.283189	0.204793	0.00272375	0.0777553	-0.0416553	0.114132	0.493424	0.0387889	0.361833	0.165337	-0.367123	-0.325411	-0.429553	-0.606595	-0.116579	-0.276673	-0.507776	-0.401578	-0.348697	-0.259753	-0.398708	-0.257178	-0.253265	-0.208504	-0.356911	-0.235998	-0.136052	0.204339	0.0639468
VIT_00s0187g00210	-0.49335	-0.413035	-0.78384	-0.480662	-0.517741	-0.630156	-0.624967	-0.654969	-0.789044	-0.774807	-0.789531	-0.823705	-0.786296	-0.766398	-0.774512	-0.901203	-0.864456	-0.873562	-0.0978623	-0.279317	-0.512672	-0.214262	-0.167116	0.139018	-0.219291	-0.0882056	0.242655	0.0743802	-0.110378	0.402944	0.529214	0.329269	0.339754	0.386521	0.780118	0.404163	0.744298	0.643742	0.790789	0.897555	0.880367	0.281749	0.0993826	-0.34421	0.214577	-0.0938003	0.205854	-0.043887	-0.157774
VIT_00s0187g00220	0.327426	0.364619	0.447332	0.477747	-0.0281223	0.263248	0.437663	0.637302	0.280858	0.70531	0.3759	0.280621	0.392914	0.154454	0.676599	0.428982	0.357205	0.501027	-0.117725	0.442812	0.597609	0.343207	-0.0577058	-0.00500199	-0.384539	-0.0833643	0.0324388	0.298905	0.785597	0.237487	-0.672832	-0.801394	-0.0553793	-0.181325	-0.233659	-0.346307	-0.610981	-0.329476	-0.521846	-0.538449	-0.380007	-0.649229	-0.393836	0.0624243	-0.683192	-0.335053	-0.0150813	0.0662764	-0.422575
VIT_00s0187g00240	0.0152546	0.178855	0.191856	0.392655	-0.350618	-0.402889	-0.161839	-0.370108	-0.034457	-0.104557	-0.349338	-0.250099	-0.13118	-0.138279	-0.0227157	-0.145933	0.0526458	-0.124279	-0.275868	-0.155341	-0.516516	-0.280971	-0.270324	-0.0509851	0.0285598	0.234267	-0.348639	0.152412	-0.188723	-0.21146	0.539101	0.27646	0.374268	0.482691	-0.140549	-0.140729	0.188167	0.358245	0.0219303	0.113734	0.177815	0.0205124	-0.335899	-0.28944	-0.192984	-0.296952	0.435874	-0.0918688	-0.126624
VIT_00s0187g00250	0.388228	0.210165	0.422937	0.367425	0.218855	0.250684	0.308675	0.371547	0.384746	0.437697	0.338082	0.302572	0.344098	0.374479	0.493018	0.428441	0.411849	0.449361	0.0145003	0.142539	0.255857	0.111062	-0.042347	-0.0949646	-0.0329685	0.0746461	0.0363127	0.113258	0.171662	-0.239513	-0.316568	-0.303536	-0.199871	-0.174244	-0.420487	-0.336589	-0.502413	-0.407981	-0.473377	-0.443731	-0.474136	-0.235173	-0.200575	-0.0305468	-0.336556	-0.198328	-0.104025	0.0400375	0.108859
VIT_00s0187g00270	0.232499	0.231831	0.0721077	-0.127027	0.359039	0.416191	0.293871	0.457181	0.149825	0.39517	0.560036	0.480563	0.413152	0.42225	0.37178	0.429299	0.322929	0.458954	0.0992873	0.14813	0.428106	0.168568	0.152417	-0.113674	0.112244	-0.0140909	0.399671	0.0269673	0.39985	0.194855	-0.468781	-0.295712	-0.562661	-0.618106	-0.20968	-0.185492	-0.445765	-0.39427	-0.477138	-0.400419	-0.46069	-0.169856	0.0322742	0.193639	-0.0793711	0.0891074	-0.0704545	0.113517	-0.00864038
VIT_00s0187g00280	0.266877	0.561646	-0.219722	-0.0534818	-0.00168575	-0.167543	-0.149398	-0.232627	-0.249695	-0.18942	-0.135199	0.0959393	0.0863139	0.195266	0.0987454	-0.00896043	0.256536	0.15903	-0.297749	-0.333318	-0.353424	-0.494423	-0.407526	-0.400606	-0.1177	-0.244695	0.0754202	-0.0484659	0.0281052	0.0548688	0.251333	0.0802579	-0.35763	-0.0921275	-0.209906	-0.305761	0.212223	0.458606	-0.306284	0.0953241	-0.0428367	0.362012	0.193905	-0.122856	-0.00487139	-0.230119	0.4205	0.11289	0.0673619
VIT_00s0187g00290	0.294126	-0.108154	0.146553	0.543265	-0.291874	-0.511059	0.0447567	-0.0290848	0.0976335	-0.159535	-0.393015	-0.293228	-0.094794	-0.0439591	0.0509207	-0.147633	-0.0948811	-0.212794	-0.550995	-0.285336	-0.332163	-0.319808	-0.488583	0.0938758	-0.390915	-0.2012	0.0375321	0.345246	-0.0502485	-0.197909	0.256749	-0.0441694	0.330525	0.521015	-0.179675	-0.380779	0.0948119	0.0476864	0.199878	0.175568	0.130297	0.118805	-0.0483649	-0.227487	-0.288901	-0.465242	-0.205317	-0.231628	0.133434
VIT_00s0187g00300	-0.34349	-0.160449	-0.200313	0.110144	-0.653401	-0.436994	-0.32352	-0.343264	-0.490872	-0.326362	-0.532058	-0.538951	-0.627672	-0.6647	-0.360526	-0.561043	-0.52071	-0.493172	0.019839	0.130227	-0.100524	0.0250373	-0.111492	0.11008	-0.383664	-0.176242	-0.121462	0.227743	0.139962	0.328236	0.123291	-0.116201	0.590088	0.649455	0.485373	0.292027	0.440609	0.465664	0.445218	0.432466	0.612595	-0.113757	-0.0659151	-0.0535158	-0.0740844	-0.117575	0.132165	-0.123539	-0.497956
VIT_00s0187g00310	0.47001	0.253891	0.0580409	-0.00605984	0.52664	0.429823	0.316992	0.536664	0.243731	0.362797	0.482453	0.444267	0.406356	0.534646	0.492033	0.444636	0.375962	0.481014	0.0607642	-0.0511398	0.390174	0.0692615	-0.021654	-0.191644	-0.0645932	-0.0901054	0.438897	-0.0295406	0.34048	-0.0911782	-0.485819	-0.377584	-0.739685	-0.684832	-0.334878	-0.393032	-0.521334	-0.447008	-0.501053	-0.344483	-0.525805	-0.0848541	0.0685414	0.0475399	-0.213079	-0.102452	-0.166901	0.0533708	0.291872
VIT_00s0187g00320	0.277551	0.437884	-0.202287	-0.124528	0.252028	0.0591487	-0.0319136	-0.0663004	-0.118551	-0.141121	0.0101577	0.208804	0.186358	0.311926	0.117311	0.121893	0.285481	0.22171	-0.0776932	-0.304619	-0.208744	-0.385023	-0.250576	-0.319793	-0.0193894	-0.21754	0.0277345	-0.232483	-0.0946185	-0.0958612	0.131217	0.0960627	-0.477371	-0.247357	-0.250813	-0.257096	0.106098	0.265586	-0.31024	0.0391289	-0.153498	0.367638	0.282943	-0.0127115	0.109369	-0.066615	0.208127	0.180813	0.223109
VIT_00s0187g00330	0.387983	0.088538	0.159606	0.437802	-0.0585989	-0.37574	0.0508664	-0.205567	0.115494	-0.291491	-0.257253	0.00324326	-0.0459175	0.279922	-0.00665887	-0.0141841	0.145222	-0.0683173	-0.455862	-0.284016	-0.525702	-0.632002	-0.506924	-0.128742	-0.150397	-0.290802	0.010227	0.21687	-0.282489	-0.338472	0.435269	0.27969	0.0248364	0.389478	-0.401862	-0.41337	0.257492	0.114548	0.086863	0.108956	-0.0113508	0.54455	0.337734	-0.0310284	0.104487	-0.232097	-0.224504	-0.268258	0.405724
VIT_00s0187g00340	-0.523405	-0.313734	-0.412881	-0.195009	-0.557678	-0.33165	-0.369654	-0.315155	-0.539774	-0.33701	-0.553131	-0.663187	-0.684956	-0.799522	-0.453443	-0.613478	-0.672225	-0.579015	0.179165	0.137527	-0.0426846	0.209608	0.0528637	0.26248	-0.283756	0.00183917	-0.0932801	0.0541211	0.09879	0.39026	0.102355	-0.0724236	0.567505	0.456859	0.699519	0.468904	0.409535	0.439124	0.532126	0.527785	0.673251	-0.218851	-0.197042	-0.17601	-0.068537	-0.0617906	0.140768	-0.0794037	-0.498036
VIT_00s0187g00350	0.472077	0.121441	0.0639192	0.109594	0.565702	0.265755	0.131586	0.241969	0.44315	0.0783099	-0.0608581	0.0708235	0.144491	0.348199	0.349131	0.27732	0.290503	0.217136	-0.0534031	-0.34613	-0.0825162	-0.150066	-0.309388	-0.105436	-0.193731	-0.103209	-0.274559	-0.460392	-0.319232	-0.633962	-0.0470767	-0.115353	-0.29738	-0.291363	-0.39021	-0.415094	-0.251574	-0.206167	-0.195671	-0.103222	-0.384772	0.148141	0.0201004	-0.345318	-0.261182	-0.353382	-0.276369	-0.213704	0.683266
VIT_00s0187g00360	0.160303	0.42538	-0.0961861	0.0650964	-0.218343	-0.292201	-0.168556	-0.418881	-0.346775	-0.417485	-0.17515	0.169679	-0.0798371	0.15322	-0.157999	-0.123942	0.177105	0.0176046	-0.228934	-0.117478	-0.414577	-0.661969	-0.392583	-0.427201	-0.108071	-0.563744	0.0604282	0.143414	-0.107233	0.159304	0.327336	0.215681	-0.126061	0.307425	-0.188094	-0.166271	0.556605	0.538126	-0.0748782	0.146422	0.115456	0.655986	0.630907	0.29655	0.395383	0.0666368	0.178219	-0.0171577	-0.020458
VIT_00s0187g00370	0.275837	0.199532	-0.229684	0.174736	-0.093932	-0.206083	-0.124211	0.070207	-0.198079	-0.0337087	-0.498153	-0.487465	-0.0589045	-0.275611	0.238827	-0.227617	-0.156536	-0.115267	-0.250956	-0.193244	-0.128591	-0.12141	-0.541284	-0.0106947	-0.658282	-0.118488	0.0377473	0.0578222	0.301123	-0.04774	0.0198686	-0.427845	-0.00400463	-0.00159672	0.12277	-0.363082	-0.0824932	0.264013	-0.0234482	0.278699	0.169027	-0.187747	-0.393218	-0.652138	-0.737847	-0.79538	0.310621	-0.150826	-0.00291601
VIT_00s0187g00380	0.57561	0.66038	0.31746	0.197333	0.622778	0.65047	0.394049	0.595508	0.439681	0.57608	0.476164	0.569579	0.598421	0.568749	0.803126	0.687636	0.747607	0.838292	0.206389	0.13358	0.458724	0.115825	-0.101659	-0.290463	-0.136386	-0.0730538	-0.224967	-0.366685	0.191868	-0.398734	-0.555519	-0.537663	-0.640612	-0.635675	-0.574935	-0.478677	-0.659382	-0.299225	-0.857715	-0.610788	-0.756509	-0.219694	-0.121898	-0.0505178	-0.448865	-0.24342	0.127858	0.261396	0.229884
VIT_00s0188g00030	-0.424868	-0.192276	-0.458267	-0.352745	-0.376733	-0.371559	-0.384128	-0.471072	-0.548506	-0.476417	-0.298985	-0.327376	-0.453237	-0.403811	-0.586578	-0.536658	-0.516605	-0.513702	-0.0183365	-0.134364	-0.22584	-0.117959	0.108653	-0.0102118	0.0419834	-0.0393925	0.257271	0.163645	0.026383	0.384584	0.256525	0.306105	0.124353	0.231887	0.521114	0.454528	0.529393	0.408636	0.447649	0.486819	0.606989	0.200535	0.224564	0.0732001	0.399382	0.244803	0.16663	0.0406699	-0.158153
VIT_00s0188g00110	-0.532627	-0.400174	0.294044	-0.275086	0.105787	0.370998	0.196685	0.137769	0.275634	0.348691	0.669115	0.398424	0.205825	0.0782673	-0.17789	0.273509	0.0215189	0.113119	0.386613	0.367262	0.485302	0.630615	0.928587	0.294036	0.801667	0.535077	-0.0334715	-0.0210501	-0.079928	0.147222	-0.268232	0.271484	0.124877	-0.194146	0.120556	0.606384	-0.242636	-0.504402	0.0212144	-0.399564	-0.155279	-0.338205	-0.0692228	0.577744	0.506382	0.867058	-0.136463	0.166188	-0.19709
VIT_00s0188g00120	-0.556698	-0.345269	-0.411572	-0.346637	-0.387348	-0.26834	-0.435308	-0.524325	-0.626343	-0.550786	-0.394693	-0.41879	-0.596788	-0.59152	-0.691842	-0.623184	-0.631904	-0.590744	0.237063	0.0879114	-0.132488	-0.0158198	0.172219	0.0289528	-0.0359938	-0.163658	0.00191245	0.0652252	-0.0845488	0.357779	0.20959	0.233162	0.339267	0.403131	0.65373	0.589006	0.632	0.449963	0.618242	0.551718	0.694144	0.215549	0.316922	0.180786	0.476714	0.359438	0.148102	-0.209663	-0.22799
VIT_00s0188g00130	-0.712009	-0.438967	-0.315887	-0.406093	-0.43082	-0.258189	-0.48495	-0.51818	-0.525653	-0.417552	-0.224537	-0.347126	-0.455797	-0.591146	-0.722055	-0.590365	-0.625096	-0.580278	0.240518	0.152603	-0.0419246	0.174129	0.411194	0.0630685	0.215534	0.0879226	0.0253488	0.100166	-0.102973	0.397069	0.189866	0.329054	0.402363	0.358163	0.684027	0.737315	0.523656	0.318074	0.603119	0.427185	0.659323	0.0608683	0.175558	0.223378	0.53011	0.514535	0.192186	-0.049043	-0.319997
VIT_00s0188g00150	-0.39548	-0.174004	0.0927776	-0.289881	-0.0574665	0.0337028	0.0359651	-0.247306	-0.016635	-0.0926303	0.415943	0.412609	0.00711682	0.192221	-0.382504	0.0918105	0.0594838	-0.0209657	0.104865	0.127192	-0.0763213	-0.0336165	0.49969	0.0641083	0.738931	0.157341	0.0913353	0.0665663	-0.229088	0.287406	0.209977	0.610271	0.028919	0.0221575	-0.0184728	0.388325	0.254905	-0.0891104	0.113521	-0.153796	-0.0239225	0.281154	0.384763	0.641968	0.814354	0.806171	-0.123551	0.0792566	-0.144939
VIT_00s0188g00190	-0.587944	-0.470246	0.125323	-0.345008	0.0735461	0.259977	-0.00108943	-0.142131	0.134196	0.0236518	0.380581	0.196926	-0.0519146	-0.0405662	-0.401964	0.0642109	-0.118103	-0.0889801	0.532757	0.272884	0.193388	0.433623	0.806542	0.247461	0.803184	0.484304	-0.166231	-0.186336	-0.420451	-0.0366473	0.0202032	0.506919	0.20891	0.00158651	0.197408	0.679223	0.042187	-0.27794	0.209709	-0.13936	0.025881	-0.0703315	0.0653647	0.459123	0.667517	0.861266	-0.105833	0.102693	-0.0453711
VIT_00s0188g00200	-0.451931	-0.347394	0.119491	-0.324584	0.255201	0.434912	0.074708	0.00935738	0.174489	0.17676	0.415254	0.216305	0.045631	0.0206939	-0.215773	0.187787	-0.0319542	0.0433048	0.568327	0.295894	0.290027	0.461554	0.747491	0.259038	0.670841	0.500958	-0.103821	-0.165563	-0.212794	-0.0316964	-0.0871845	0.34225	0.0423214	-0.210071	0.174845	0.564941	-0.10572	-0.303791	0.0804804	-0.177913	-0.0532864	-0.177943	-0.0635879	0.35432	0.443678	0.686204	-0.0473296	0.00083087	0.0128686
VIT_00s0188g00210	-0.593327	-0.416466	0.168562	-0.326948	0.00942943	0.209931	0.035733	-0.139451	0.0925019	0.066657	0.487035	0.306206	0.0162259	0.0184617	-0.399738	0.0981045	-0.0759615	-0.0510909	0.38436	0.261935	0.223934	0.397717	0.841768	0.219145	0.843628	0.451342	-0.0432866	-0.0171588	-0.268817	0.130565	-0.000106538	0.517422	0.175807	-0.00575008	0.175674	0.67122	0.0539455	-0.275798	0.176659	-0.192538	0.0220081	-0.0589621	0.126796	0.608518	0.731851	0.935563	-0.0753819	0.106547	-0.135362
VIT_00s0189g00010	-0.261564	-0.125496	-0.574743	-0.156185	-0.586291	-0.692112	-0.72357	-0.769575	-0.759251	-0.819339	-0.841522	-0.69172	-0.709196	-0.622174	-0.648272	-0.851945	-0.617995	-0.723509	-0.125653	-0.272992	-0.625398	-0.451415	-0.395055	-0.234172	-0.341815	-0.328491	0.0530887	0.114551	-0.249537	0.209925	0.597411	0.278894	0.364824	0.664381	0.501024	0.220753	0.846009	0.813252	0.591935	0.826823	0.80282	0.462339	0.256689	-0.26765	0.207573	-0.188059	0.230969	-0.198404	-0.110103
VIT_00s0189g00020	0.531615	0.163597	0.196781	0.204991	0.300803	0.0794723	0.284705	0.309699	0.276099	0.155226	0.416391	0.46947	0.396616	0.640709	0.327801	0.35034	0.375571	0.34965	-0.228123	-0.17178	0.129441	-0.195933	-0.129685	-0.233038	0.017028	-0.203362	0.617202	0.27455	0.109226	-0.183696	-0.211788	-0.116306	-0.550536	-0.307031	-0.486467	-0.451124	-0.301055	-0.389824	-0.345218	-0.276205	-0.441032	0.220727	0.306445	0.203601	0.0194267	-0.0254844	-0.267261	-0.153387	0.436125
VIT_00s0189g00030	0.353488	0.106064	0.026066	-0.0808932	0.777057	0.587211	0.293656	0.305237	0.343774	0.0370084	0.184315	0.318876	0.230401	0.454837	0.25842	0.409331	0.337815	0.353876	0.398174	-0.14588	0.147213	-0.0839701	-0.039828	-0.055037	0.00500648	-0.19903	-0.277848	-0.603105	-0.371356	-0.6171	-0.201352	-0.0445552	-0.49682	-0.458895	-0.350076	-0.216052	-0.199614	-0.241587	-0.227749	-0.161361	-0.44395	0.281694	0.352396	0.085668	0.11425	0.0844558	-0.236535	-0.0361526	0.654497
VIT_00s0189g00050	0.0149648	-0.194625	0.112007	-0.0432083	0.179908	0.0711304	-0.0308059	0.0586816	0.198199	0.00485201	0.256096	0.224285	0.381732	0.224194	-0.0506973	0.097825	0.0638844	0.0645133	0.00222975	-0.0421304	0.180782	0.0959471	0.227685	-0.13027	0.227903	-0.0271509	0.176021	0.0257485	-0.206798	-0.179062	-0.133491	0.0952535	-0.119191	-0.0599239	-0.0994192	0.106547	-0.0936494	-0.276073	0.00163551	-0.136531	-0.121491	0.131067	0.272845	0.240367	0.287108	0.304686	-0.204462	0.0752892	0.306694
VIT_00s0189g00080	0.0924803	-0.038674	-0.224554	-0.2546	0.131535	-0.0413165	-0.00946202	0.0868215	-0.0796702	-0.0202069	0.172583	0.108826	-0.0219273	0.202022	-0.00937637	0.0147104	-0.0379049	-0.0049194	-0.183292	-0.149562	-0.021856	-0.0649329	0.0050525	-0.0576327	0.117059	0.049331	0.579789	0.140947	0.166688	0.217371	-0.00304211	0.0818494	-0.386491	-0.378497	0.00281285	-0.107457	-0.10205	-0.182991	-0.0409852	0.023801	-0.103594	0.0967363	0.0679427	-0.0619017	0.0718058	-0.0109974	-0.0828368	-0.0307066	0.124759
VIT_00s0189g00090	0.599105	0.309394	0.218371	0.282249	0.265026	0.0155305	0.255361	0.310521	0.292078	0.210464	0.303227	0.412677	0.500001	0.606742	0.462776	0.368625	0.46108	0.403048	-0.444057	-0.24844	0.0118817	-0.262722	-0.314647	-0.283634	-0.0859918	-0.202008	0.374425	0.190102	0.150567	-0.178627	-0.107496	-0.175526	-0.476693	-0.286889	-0.55309	-0.611391	-0.321337	-0.273301	-0.419065	-0.289605	-0.477047	0.160767	0.132026	0.0242691	-0.195468	-0.255669	-0.173829	-0.121838	0.351812
VIT_00s0189g00110	0.226936	-0.0434553	-0.34556	0.167421	-0.238785	-0.520948	-0.202393	-0.198508	-0.28985	-0.407307	-0.71901	-0.599006	-0.31982	-0.278498	-0.0897003	-0.44198	-0.340423	-0.43943	-0.462003	-0.383688	-0.548864	-0.48205	-0.722725	0.017784	-0.61023	-0.30457	0.0925424	0.11777	0.0256679	0.0106966	0.436902	-0.0428941	0.177768	0.298361	0.115196	-0.400268	0.324764	0.401652	0.377526	0.554853	0.373749	0.245609	-0.0471517	-0.558558	-0.382845	-0.708727	0.00822516	-0.279086	0.0786716
VIT_00s0193g00080	-0.619519	-0.405602	-0.284654	-0.575025	0.0112502	0.0851824	-0.253291	-0.400499	-0.220264	-0.280033	0.0119321	-0.101096	-0.3909	-0.23459	-0.595556	-0.234025	-0.348788	-0.36155	0.42534	0.044316	-0.159382	0.146632	0.533344	0.194879	0.61891	0.402612	-0.102031	-0.249236	-0.379178	0.126565	0.321379	0.639597	0.130933	-0.0265663	0.409647	0.650742	0.352171	0.0943107	0.412602	0.253068	0.309889	0.14282	0.107645	0.18258	0.648669	0.627709	-0.0143343	-0.0870125	-0.0212077
VIT_00s0193g00110	-0.596325	-0.389601	-0.377422	-0.434622	-0.379564	-0.421909	-0.436535	-0.716573	-0.477504	-0.59922	-0.279626	-0.290715	-0.529594	-0.343807	-0.791351	-0.5204	-0.481548	-0.599283	0.0440831	-0.129608	-0.539402	-0.212872	0.237722	0.111841	0.501347	0.21889	0.0905772	0.0505849	-0.440693	0.271892	0.682106	0.819572	0.323132	0.382747	0.419692	0.53455	0.680788	0.394838	0.592287	0.497504	0.551032	0.41152	0.241288	0.13688	0.721542	0.491371	0.111095	0.0122072	-0.133308
VIT_00s0193g00160	-0.500656	-0.431504	-0.364552	-0.331262	-0.298145	-0.480946	-0.461962	-0.68523	-0.306878	-0.556631	-0.48039	-0.521725	-0.500499	-0.402516	-0.67529	-0.521559	-0.487645	-0.633468	-0.0507583	-0.313886	-0.690484	-0.192031	0.101342	0.214971	0.43433	0.449846	-0.08391	-0.0721968	-0.603074	-0.0490932	0.836289	0.834831	0.413328	0.38705	0.366592	0.396391	0.546093	0.389937	0.604726	0.56689	0.536839	0.290238	-0.112464	-0.277817	0.40002	0.159218	0.19626	0.00898866	0.0481083
VIT_00s0194g00010	-0.156556	-0.20884	-0.411473	-0.220959	-0.105572	-0.205866	-0.497446	-0.181477	-0.247699	-0.230031	-0.478895	-0.600818	-0.231847	-0.493393	-0.176163	-0.471279	-0.447211	-0.390737	0.0797144	-0.226639	-0.0459232	0.202167	-0.0763945	-0.104514	-0.283323	0.124188	-0.0104352	-0.199052	-0.154281	-0.12735	0.0447198	-0.146014	0.139126	0.0692908	0.435205	0.172701	0.0639156	0.238394	0.260715	0.448796	0.378292	-0.18643	-0.30689	-0.585588	-0.306795	-0.335205	0.257907	-0.123491	0.0831788
VIT_00s0194g00020	-0.284546	-0.255743	-0.460014	-0.295866	-0.40003	-0.576184	-0.546399	-0.600569	-0.497947	-0.723323	-0.440404	-0.307857	-0.449898	-0.316048	-0.63334	-0.628229	-0.449758	-0.57241	-0.162585	-0.311071	-0.419119	-0.326758	-0.120699	-0.191378	-0.0229274	-0.359044	0.200183	0.00828455	-0.437075	0.180872	0.43769	0.378063	0.236702	0.465718	0.319489	0.247807	0.713221	0.49484	0.541389	0.569964	0.515264	0.560162	0.538398	0.091694	0.537312	0.213104	2.70845e-05	-0.114616	0.0308306
VIT_00s0194g00030	-0.341828	-0.304234	-0.524905	-0.315843	-0.225354	-0.247313	-0.33215	-0.427022	-0.485253	-0.494007	-0.490545	-0.513808	-0.618822	-0.464124	-0.542948	-0.537389	-0.588132	-0.600826	0.158488	-0.155064	-0.35036	-0.13802	-0.0445829	0.090361	-0.0601507	-0.0125129	0.0528358	-0.0634094	-0.100559	0.231837	0.350816	0.27947	0.175595	0.22247	0.525314	0.340232	0.537397	0.400826	0.533988	0.62436	0.607174	0.16193	0.0856664	-0.158184	0.219113	0.0414648	-0.0758383	-0.17487	-0.0616211
VIT_00s0194g00040	0.530903	0.25695	-0.141741	0.203254	0.179949	-0.227365	-0.0658561	0.0462541	0.0359847	-0.147209	-0.370956	-0.186776	0.101783	0.152774	0.269841	-0.0374875	0.102388	0.0207859	-0.518128	-0.401814	-0.316538	-0.444712	-0.681221	-0.199609	-0.529446	-0.34058	0.0550626	-0.0467721	-0.0175583	-0.281606	0.153759	-0.185614	-0.234724	-0.0646385	-0.257119	-0.594284	-0.0278024	0.15134	-0.0890437	0.16374	-0.0953371	0.272769	0.0456815	-0.499871	-0.425288	-0.684949	0.0501796	-0.143799	0.446069
VIT_00s0194g00050	0.133182	0.0164904	-0.169541	-0.251376	0.244333	0.18034	0.195679	0.255618	0.0781835	0.0535322	0.155192	0.144434	0.187407	0.176647	0.121519	0.155834	0.0832678	0.133444	0.0106374	-0.0796426	0.151102	0.0433662	0.00845451	0.145095	-0.00883387	-0.114557	0.240023	-0.158752	0.0540474	0.0447099	-0.197449	-0.122815	-0.287562	-0.368417	-0.0495015	-0.115842	-0.150407	-0.145862	-0.116766	-0.0680255	-0.214169	0.0423123	0.107232	0.0162918	-0.0133954	-0.00285163	-0.203399	0.0160031	0.162282
VIT_00s0194g00060	0.512385	0.0990254	-0.162518	0.25197	-0.0113159	-0.420559	-0.176383	-0.104872	-0.0250638	-0.276089	-0.435797	-0.290347	0.00785953	0.115557	0.111816	-0.191694	-0.0144766	-0.142433	-0.523122	-0.538822	-0.485796	-0.528161	-0.692436	-0.232192	-0.449	-0.24968	0.363918	0.198907	-0.0767369	-0.271992	0.336676	-0.0161356	-0.155125	0.113752	-0.214456	-0.565221	0.0905144	0.167272	0.0562583	0.30953	0.0593449	0.350828	0.0325716	-0.522376	-0.343003	-0.683759	0.00566032	-0.138239	0.442938
VIT_00s0194g00070	0.627589	0.276662	0.474573	0.477869	0.474087	0.275374	0.510393	0.519248	0.655071	0.364326	0.289863	0.457563	0.437483	0.630126	0.611785	0.60903	0.601939	0.53632	-0.246179	-0.106146	0.13127	-0.158056	-0.285717	-0.0559475	-0.176783	-0.244717	-0.192525	-0.143689	-0.0380274	-0.487873	-0.251466	-0.274154	-0.271215	-0.217158	-0.70588	-0.62767	-0.439081	-0.419449	-0.414003	-0.494166	-0.649296	0.0714829	0.125237	0.0652941	-0.260989	-0.235562	-0.301699	-0.0670632	0.430045
VIT_00s0194g00080	-0.359674	-0.218328	-0.500521	-0.279031	-0.516992	-0.700092	-0.671053	-0.809128	-0.654843	-0.801681	-0.625074	-0.519756	-0.633879	-0.477801	-0.724484	-0.753427	-0.537051	-0.672002	-0.171649	-0.400217	-0.622356	-0.386597	-0.142704	-0.160384	0.0369527	-0.100654	0.0919645	0.0759067	-0.479731	0.0969941	0.661626	0.542207	0.284371	0.57304	0.406007	0.318626	0.773596	0.646046	0.545796	0.71126	0.666422	0.515089	0.286286	-0.134253	0.461714	0.102852	0.227803	-0.140914	0.00662633
VIT_00s0194g00090	-0.340693	0.0323802	0.193922	-0.208694	0.0348968	0.408301	0.242358	0.279857	0.143446	0.492392	0.575686	0.3871	0.155598	0.02724	0.106917	0.293698	0.143219	0.271841	0.288974	0.485634	0.552583	0.548853	0.601883	0.168945	0.366597	0.294338	-0.0803831	-0.0533807	0.375977	0.398594	-0.440069	-0.143515	-0.0132231	-0.348729	0.116957	0.361044	-0.292809	-0.270526	-0.191163	-0.433995	-0.182681	-0.49408	-0.183641	0.399699	0.102004	0.473546	0.0502163	0.297424	-0.47258
VIT_00s0194g00100	-0.115504	0.0166899	-0.211442	-0.488525	0.462262	0.492685	-0.0483796	0.0429548	0.0349972	-0.0309256	0.222419	0.245385	-0.0813868	0.151635	-0.0755119	0.143884	0.0794286	0.134601	0.51988	0.0763214	0.181125	0.124015	0.26389	-0.124275	0.236156	-0.025195	-0.160852	-0.563063	-0.234038	-0.0624355	-0.191472	0.10082	-0.364855	-0.455568	0.0381099	0.235245	-0.0195254	-0.126154	-0.117335	-0.0942917	-0.20897	0.152771	0.294882	0.114371	0.365386	0.357565	-0.180882	0.0843821	0.217594
VIT_00s0194g00110	0.778599	0.581853	0.630198	0.537658	0.584479	0.484573	0.625642	0.655712	0.702638	0.651574	0.604679	0.734503	0.724376	0.863155	0.871916	0.858979	0.887499	0.869092	-0.175519	0.0489765	0.292714	-0.10345	-0.210433	-0.212782	-0.0376549	-0.079415	-0.0508662	-0.00695277	0.220661	-0.449499	-0.410243	-0.372045	-0.576168	-0.486857	-0.881227	-0.719289	-0.718499	-0.546569	-0.84044	-0.77247	-0.895342	-0.092056	-0.0455308	0.0951087	-0.39311	-0.258611	-0.147	0.0446844	0.35695
VIT_00s0194g00120	-0.00351943	0.0468637	0.327604	0.0494905	0.20792	0.594456	0.527732	0.653002	0.269497	0.614202	0.594785	0.410663	0.363105	0.135535	0.390095	0.467551	0.219662	0.467781	0.408465	0.605737	0.852132	0.596195	0.426187	0.218257	-0.0189538	0.0159463	0.00149149	0.0334715	0.515605	0.195521	-0.829843	-0.587961	-0.156781	-0.383129	-0.0209478	0.117071	-0.553043	-0.52381	-0.375051	-0.544172	-0.371343	-0.55955	-0.12493	0.387674	-0.174841	0.239747	-0.22963	0.127351	-0.297728
VIT_00s0194g00130	0.380127	0.144677	0.137541	-0.0545008	0.587448	0.397178	0.375329	0.337207	0.372947	0.143864	0.45754	0.560873	0.410092	0.647908	0.259682	0.482268	0.435195	0.421951	0.0352769	-0.193517	0.178132	-0.137365	0.0450516	-0.12508	0.181249	-0.170592	0.169434	-0.177179	-0.12387	-0.316834	-0.2303	0.0215204	-0.607712	-0.490329	-0.448059	-0.258526	-0.234901	-0.36627	-0.303677	-0.311343	-0.496475	0.301806	0.431162	0.312014	0.251612	0.227613	-0.320608	-0.10364	0.540244
VIT_00s0194g00140	-0.227939	-0.0694446	-0.635552	-0.490592	-0.0426012	-0.24575	-0.567347	-0.483072	-0.468698	-0.495851	-0.562886	-0.542683	-0.369388	-0.413124	-0.394838	-0.511981	-0.407789	-0.432458	0.0194689	-0.320431	-0.427784	-0.162876	-0.159434	-0.123207	-0.0947092	0.0763301	-0.0450676	-0.290965	-0.27362	0.0140028	0.403892	0.264947	-0.0461568	0.00413305	0.428237	0.211969	0.41574	0.524433	0.302503	0.60134	0.453563	0.239952	-0.0327529	-0.501571	0.0616679	-0.17746	0.294915	0.000381919	0.159814
VIT_00s0194g00160	-0.48462	-0.268288	-0.00136391	-0.155555	-0.275602	-0.174436	-0.326131	-0.326615	0.0149358	-0.0591308	-0.158431	-0.297092	-0.108991	-0.379194	-0.310436	-0.211272	-0.205408	-0.241392	0.158433	0.0479126	-0.175931	0.274548	0.340213	0.17301	0.411051	0.568758	-0.310001	-0.106692	-0.384086	-0.071366	0.32669	0.395869	0.494576	0.296982	0.256528	0.458124	0.10738	0.129718	0.209385	0.0948253	0.250632	-0.220687	-0.43396	-0.217892	0.0890577	0.15742	0.250794	0.419873	-0.222791
VIT_00s0194g00180	0.656325	0.495481	0.661148	0.4554	0.555016	0.609195	0.695211	0.775029	0.722097	0.784596	0.777902	0.818265	0.744469	0.827394	0.855657	0.889347	0.841683	0.880598	-0.0438233	0.249906	0.51703	0.0985955	-0.0143872	-0.13942	0.00407593	-0.0627705	0.0297944	0.0339777	0.394779	-0.251789	-0.611275	-0.480958	-0.554006	-0.569414	-0.771302	-0.57992	-0.787349	-0.668575	-0.806997	-0.859664	-0.890357	-0.24981	-0.0483538	0.259401	-0.344842	-0.0953963	-0.280994	0.0993599	0.182627
VIT_00s0194g00190	0.71834	0.495066	0.578346	0.496019	0.451985	0.364135	0.525394	0.483521	0.579053	0.509659	0.590056	0.738982	0.64945	0.85903	0.671269	0.709066	0.776596	0.693944	-0.218477	0.0380629	0.139226	-0.258991	-0.237869	-0.304313	0.00931894	-0.188373	0.141081	0.157553	0.258415	-0.242547	-0.269184	-0.218243	-0.536161	-0.38476	-0.808677	-0.665292	-0.495407	-0.474363	-0.661613	-0.651803	-0.738132	0.087598	0.153922	0.232694	-0.175157	-0.145169	-0.258067	-0.067325	0.298452
VIT_00s0194g00200	-0.479685	-0.395755	-0.460315	-0.558248	0.105284	0.091755	-0.45727	-0.36146	-0.288496	-0.398132	-0.362333	-0.440538	-0.357944	-0.462194	-0.481181	-0.413417	-0.456466	-0.423236	0.522986	-0.0943767	-0.148035	0.165383	0.237328	0.0833584	0.170874	0.220783	-0.315674	-0.521472	-0.509587	-0.161644	0.260485	0.325783	0.157146	-0.0071483	0.509822	0.510177	0.316327	0.248207	0.444311	0.461791	0.388514	0.0973815	-0.0357596	-0.259166	0.263899	0.186003	0.141469	-0.0128521	0.137602
VIT_00s0194g00210	0.0343822	0.116197	-0.278983	-0.101666	0.0270885	0.00827057	-0.223567	0.0394433	-0.126518	-0.0309085	-0.348231	-0.339366	-0.075511	-0.302193	0.103366	-0.184932	-0.146994	-0.0715084	0.0296189	-0.0928744	0.0465504	0.076448	-0.2388	-0.0553477	-0.438368	-0.0969966	-0.138561	-0.245322	0.0997107	-0.0321282	-0.0874212	-0.33481	0.0122573	-0.0906761	0.233878	-0.0454402	-0.0184048	0.251061	0.0296712	0.199361	0.152735	-0.172272	-0.22904	-0.450475	-0.437584	-0.431821	0.264802	0.124996	0.0039167
VIT_00s0194g00220	0.0931198	0.078485	-0.359621	-0.233974	-0.0396514	-0.244946	-0.208765	-0.239497	-0.288862	-0.359402	-0.129769	-0.0343664	-0.192241	0.0897557	-0.207509	-0.194488	-0.0869296	-0.160368	-0.14511	-0.251245	-0.325209	-0.367696	-0.203577	-0.219084	-0.00264532	-0.209869	0.411586	0.0419882	-0.0705416	0.164596	0.224857	0.217923	-0.293008	-0.0376551	0.0116581	-0.0857992	0.28931	0.20213	0.0412829	0.25675	0.11304	0.420554	0.344589	-0.0413903	0.260283	0.00861048	-0.0826009	0.0349378	0.147821
VIT_00s0194g00250	-0.488353	-0.198581	-0.33521	-0.45238	-0.295647	-0.295574	-0.432176	-0.63674	-0.462073	-0.573176	-0.108371	-0.0231506	-0.37183	-0.177972	-0.706176	-0.411532	-0.307204	-0.404727	0.099971	-0.082926	-0.329856	-0.231463	0.243886	-0.128677	0.410764	-0.0954322	0.159164	0.0365862	-0.355317	0.32625	0.416693	0.634689	0.112071	0.284351	0.319681	0.526786	0.68128	0.381124	0.396924	0.338574	0.424109	0.532954	0.563068	0.376081	0.855019	0.620133	0.0786773	-0.0194974	-0.0862315
VIT_00s0194g00260	0.39376	0.247307	-0.476282	-0.263742	0.418145	-0.0430695	-0.243606	-0.198544	-0.149697	-0.491076	-0.32477	-0.0336456	-0.17238	0.256802	-0.0396745	-0.110978	0.0773816	-0.0378936	-0.130023	-0.586885	-0.436251	-0.59914	-0.522079	-0.405022	-0.259503	-0.465979	0.0839791	-0.447315	-0.393247	-0.332022	0.257218	0.153513	-0.553935	-0.253529	-0.186417	-0.347729	0.2838	0.287658	-0.0284903	0.322001	-0.0683808	0.708577	0.543473	-0.290702	0.161228	-0.251433	-0.0394648	-0.0409442	0.70104
VIT_00s0194g00270	0.044142	0.287547	0.287098	0.0942247	0.0621734	0.166258	0.0926808	0.0944226	0.187027	0.326002	0.232582	0.223204	0.414254	0.135965	0.300997	0.280017	0.369758	0.387372	-0.0247305	0.15357	0.127855	0.128222	0.0712193	-0.0914603	0.16321	0.201556	-0.260501	-0.0732012	0.0351328	-0.0928171	-0.0861454	-0.0815665	-0.0332212	-0.135678	-0.230085	-0.09838	-0.300005	-0.0803107	-0.426355	-0.377535	-0.308544	-0.210437	-0.285773	-0.0448493	-0.191558	-0.0454153	0.378663	0.403112	-0.145002
VIT_00s0194g00280	-0.298384	-0.245413	-0.128444	-0.444893	0.157644	0.279633	0.184178	0.123987	0.049969	0.122629	0.312647	0.142572	-0.0022139	0.0175339	-0.143757	0.151235	-0.069633	0.0436277	0.282226	0.178704	0.213983	0.316511	0.477484	0.335107	0.416142	0.296775	0.225195	-0.088	0.0248885	0.260208	-0.139931	0.17551	-0.0765532	-0.327146	0.203294	0.349253	-0.0979203	-0.236057	0.0226791	-0.097363	-0.0737527	-0.123862	-0.0322875	0.195465	0.282725	0.423965	-0.0872061	0.207199	-0.0690428
VIT_00s0194g00300	-0.507966	-0.193448	-0.316753	-0.519483	-0.196403	-0.238368	-0.406738	-0.639562	-0.372199	-0.501633	-0.011017	0.0414574	-0.303028	-0.0862845	-0.687701	-0.326344	-0.235646	-0.358689	0.10635	-0.124114	-0.393117	-0.210048	0.333934	-0.127005	0.622205	0.114663	0.125825	-0.0464675	-0.43953	0.268789	0.501102	0.783255	0.0366867	0.161047	0.253307	0.528482	0.609453	0.316413	0.328566	0.285484	0.340652	0.497678	0.451826	0.329184	0.888726	0.674659	0.0674205	0.0673402	-0.0363397
VIT_00s0194g00310	-0.402908	-0.0466065	-0.081647	-0.203309	-0.279977	-0.115789	-0.188861	-0.276241	-0.234081	-0.0227614	-0.0994235	-0.207153	-0.10266	-0.336739	-0.220808	-0.183008	-0.165658	-0.161638	0.0591856	0.125833	-0.129624	0.125896	0.19805	0.188884	0.270446	0.355349	-0.173773	0.0224082	-0.012943	0.250755	0.24535	0.229263	0.304081	0.135295	0.264455	0.299222	0.124463	0.21911	0.076994	0.0864034	0.213611	-0.184157	-0.345693	-0.10701	0.0209939	0.0912325	0.315291	0.200964	-0.378792
VIT_00s0194g00330	-0.552046	-0.183971	-0.237112	-0.549639	0.026769	0.170417	-0.294418	-0.251299	-0.173413	-0.0823761	0.123228	-0.00917888	-0.0976456	-0.219365	-0.347276	-0.115191	-0.167715	-0.121088	0.472792	0.153072	0.100744	0.353331	0.569383	0.00317734	0.551357	0.394367	-0.158528	-0.344515	-0.311095	0.126021	0.0587791	0.340596	0.0478987	-0.127589	0.345968	0.601329	0.127908	0.0845589	0.0721958	0.0666567	0.142071	-0.106585	-0.0595114	0.103195	0.413242	0.537453	0.180814	0.15683	-0.179684
VIT_00s0194g00340	-0.701644	-0.418493	-0.538892	-0.376583	-0.669198	-0.597888	-0.649185	-0.774886	-0.73173	-0.677093	-0.599355	-0.644465	-0.737609	-0.755476	-0.86428	-0.8525	-0.791109	-0.851691	0.0172305	-0.0730054	-0.460843	-0.114368	0.0940044	0.0645964	0.0679513	0.0274121	0.0583378	0.151251	-0.151327	0.493513	0.572227	0.48205	0.562798	0.585964	0.760056	0.623917	0.822864	0.656637	0.803109	0.752164	0.920757	0.203804	0.117655	-0.0264004	0.444644	0.241173	0.24842	-0.115416	-0.39376
VIT_00s0194g00360	-0.529499	-0.319529	0.448883	-0.0473195	-0.0586252	0.322812	0.238652	0.177307	0.293289	0.486846	0.606242	0.299986	0.241019	-0.051486	-0.0593222	0.277925	0.0372369	0.157255	0.369717	0.508955	0.535615	0.722407	0.891052	0.359529	0.698349	0.644692	-0.177158	0.105859	0.0636616	0.125117	-0.303003	0.12523	0.300824	-0.0414562	0.130909	0.579815	-0.339258	-0.462972	-0.0456095	-0.458599	-0.115288	-0.578056	-0.347827	0.480301	0.241381	0.701935	0.0265478	0.230923	-0.38658
VIT_00s0198g00060	-0.305974	0.0673127	0.300452	0.117103	-0.231806	0.240564	0.112731	0.0275482	-0.048797	0.245607	0.262395	0.195346	-0.0688664	-0.153275	-0.013697	0.112583	0.0636537	0.157714	0.48082	0.829781	0.36144	0.336591	0.399541	0.0968864	0.163605	0.09395	-0.24935	0.134546	0.229732	0.269063	-0.263048	-0.113413	0.285894	0.206779	0.125664	0.379979	-0.0135073	-0.00234926	-0.0878868	-0.262387	0.0406055	-0.312067	-0.0712896	0.439115	0.133584	0.381213	0.0714815	0.133882	-0.553846
VIT_00s0198g00140	0.379189	0.16782	-0.145743	0.0913709	0.279129	0.144732	0.0282222	0.325163	0.155036	0.210193	-0.296831	-0.350196	0.0905359	-0.0865261	0.445092	0.0605944	0.0379631	0.113216	-0.0204139	-0.153089	0.0134398	0.0920729	-0.400037	0.0621669	-0.502578	0.115362	-0.0808673	-0.245405	0.164259	-0.31729	-0.123353	-0.453466	-0.155108	-0.314582	-0.02622	-0.402578	-0.394395	-0.0166403	-0.194376	0.0757798	-0.12655	-0.335148	-0.577917	-0.782352	-0.841639	-0.804595	0.151823	0.0590466	0.221091
VIT_00s0198g00150	0.394271	0.0829525	0.0347373	0.193063	0.331532	0.204758	0.218099	0.444866	0.316215	0.35231	-0.140273	-0.235966	0.158976	0.027601	0.515392	0.212488	0.112221	0.190899	-0.0726293	-0.107631	0.0911073	0.156805	-0.300639	0.189196	-0.39694	0.216632	-0.0809246	-0.14921	0.196228	-0.347243	-0.175884	-0.42382	-0.126285	-0.344198	-0.129681	-0.432231	-0.527901	-0.223275	-0.211803	-0.0701998	-0.252069	-0.401486	-0.619413	-0.670836	-0.827981	-0.729007	0.0492809	-0.0371514	0.22872
VIT_00s0198g00170	0.198851	-0.00760588	-0.22864	-0.0887429	0.313108	0.13941	-0.110881	0.162745	0.108413	0.104204	-0.316885	-0.42154	-0.0487049	-0.154164	0.250762	-0.0414025	-0.0916769	-0.03503	0.0750676	-0.219825	-0.0732558	0.12179	-0.258323	0.0671128	-0.29282	0.27809	-0.112297	-0.326927	-0.0228093	-0.335592	0.00595166	-0.225285	-0.134499	-0.33928	0.0732109	-0.23295	-0.314388	-0.0474093	-0.0564212	0.165149	-0.0597064	-0.282141	-0.571575	-0.811169	-0.655084	-0.651576	0.116983	-0.0402625	0.26553
VIT_00s0198g00180	0.227131	0.0573639	-0.281235	0.0210244	0.0922394	-0.104979	-0.18952	0.0957443	-0.0575244	0.0200403	-0.446921	-0.519479	-0.093413	-0.245691	0.225914	-0.182964	-0.168417	-0.124367	-0.178209	-0.276725	-0.129706	0.0308028	-0.387178	0.0244533	-0.472733	0.155496	-0.0111113	-0.129405	0.127663	-0.21004	0.0499649	-0.297408	-0.0664807	-0.161008	0.130116	-0.286253	-0.210045	0.124098	-0.00595723	0.279868	0.0935982	-0.255699	-0.545241	-0.817583	-0.724606	-0.766854	0.211142	-0.0467128	0.182533
VIT_00s0199g00010	0.746487	0.787765	0.0670635	0.485191	0.0739961	-0.127468	0.0416108	0.0780015	-0.0673193	-0.0526144	-0.225542	0.137469	0.214056	0.320389	0.507647	0.112031	0.455338	0.369086	-0.415472	-0.202255	-0.175742	-0.617034	-0.827449	-0.545595	-0.727414	-0.682618	-0.0563264	0.0425985	0.217787	-0.246676	-0.0488303	-0.456726	-0.409583	0.0188624	-0.493787	-0.754164	-0.000997665	0.356239	-0.470002	-0.0475034	-0.219555	0.332958	0.266837	-0.201943	-0.435531	-0.664452	0.285751	-0.0156092	0.221607
VIT_00s0199g00020	0.33583	0.217642	0.51032	0.319908	0.455881	0.631255	0.521736	0.782339	0.61918	0.842275	0.571382	0.394529	0.613953	0.349278	0.769252	0.669612	0.488007	0.661143	0.164625	0.287806	0.711536	0.548486	0.210939	0.0733057	-0.0616016	0.263006	-0.14183	-0.0771865	0.431945	-0.254642	-0.72491	-0.649456	-0.257184	-0.52574	-0.346431	-0.271517	-0.892404	-0.631902	-0.611162	-0.671873	-0.629502	-0.704725	-0.520046	-0.0243236	-0.63885	-0.189878	-0.0500111	0.0733988	0.0143185
VIT_00s0199g00030	0.476392	0.221895	-0.140266	0.0585311	0.428775	0.0618299	-0.0574122	0.119546	0.147452	-0.0155525	-0.211258	-0.129831	0.061808	0.195615	0.31634	0.0890949	0.169164	0.143642	-0.13938	-0.367649	-0.15009	-0.191454	-0.392821	-0.18971	-0.281507	-0.00213952	-0.0269993	-0.270424	-0.189985	-0.541028	0.0522051	-0.130363	-0.383353	-0.290668	-0.251351	-0.422281	-0.242414	-0.00974091	-0.245106	0.0789473	-0.230091	0.103236	-0.159021	-0.593333	-0.419337	-0.555535	0.0495871	-0.0748639	0.603258
VIT_00s0199g00040	0.709231	0.575578	0.624047	0.618807	0.470484	0.553409	0.653018	0.662508	0.549728	0.630457	0.483034	0.604986	0.548283	0.650411	0.822097	0.758452	0.747895	0.795909	0.0481277	0.29561	0.424263	-0.0326376	-0.220035	-0.15209	-0.279834	-0.239085	-0.151379	0.0595673	0.403441	-0.345647	-0.55182	-0.581122	-0.43064	-0.328869	-0.695069	-0.600908	-0.61476	-0.412316	-0.739189	-0.674656	-0.702412	-0.18575	-0.0185227	0.188146	-0.453617	-0.272794	-0.116625	-0.0518709	0.180938
VIT_00s0199g00050	0.618914	0.537208	0.417574	0.368571	0.410113	0.531871	0.65404	0.699049	0.413998	0.611252	0.528549	0.606092	0.499442	0.59351	0.757238	0.705522	0.654857	0.748943	0.00516923	0.256672	0.457185	0.00806052	-0.191556	-0.0910708	-0.268373	-0.283131	0.0851869	0.0753019	0.571032	-0.00276037	-0.607629	-0.617682	-0.512842	-0.481235	-0.558385	-0.564917	-0.575218	-0.408308	-0.711772	-0.625022	-0.678333	-0.204105	0.0109276	0.213638	-0.411439	-0.229076	-0.238656	0.0596821	0.00588455
VIT_00s0199g00070	-0.109348	-0.0659042	-0.32914	-0.391097	0.318503	0.290471	-0.208817	-0.00203722	-0.0836882	-0.132546	-0.144331	-0.172697	-0.16612	-0.167229	-0.0775592	-0.0761446	-0.136562	-0.0263043	0.495666	-0.0384696	0.149992	0.20543	0.121667	-0.0485258	-0.0427394	0.0531	-0.208826	-0.53321	-0.323255	-0.269915	-0.139163	-0.0549482	-0.177858	-0.243034	0.227623	0.240891	-0.0216807	0.0438839	0.00243461	0.151878	0.0156032	-0.00162533	0.0105489	-0.244201	0.018876	0.0262178	0.0355613	0.0799127	0.257121
VIT_00s0199g00080	-0.130016	-0.311437	-0.456015	-0.491947	0.365559	0.210092	-0.226683	-0.0141191	-0.100265	-0.158837	-0.140537	-0.287953	-0.249991	-0.159782	-0.202505	-0.170004	-0.329542	-0.233274	0.341386	-0.212026	0.0129876	0.186735	0.173412	0.0807376	0.069496	0.25599	0.180422	-0.310405	-0.168062	-0.13143	-0.01045	0.100087	-0.274701	-0.391725	0.336711	0.234875	-0.0299221	-0.0802866	0.200596	0.328872	0.136604	-0.0186779	-0.10713	-0.359975	0.0275111	-0.010379	-0.10765	-0.234399	0.375702
VIT_00s0199g00110	-0.135941	0.0663246	0.292105	0.110697	-0.234084	-0.206303	-0.0732321	-0.258009	0.0033809	-0.0869952	0.267203	0.346519	0.204028	0.176467	-0.159132	0.0559419	0.208842	0.125655	-0.115612	0.0381735	-0.00577244	-0.0693593	0.266147	-0.21399	0.438441	0.00356566	-0.029024	0.206784	-0.307054	-0.0580643	0.094619	0.312892	0.0736847	0.335188	-0.215182	0.17778	0.147751	0.0181658	-0.157732	-0.208281	-0.0779876	0.23328	0.305435	0.497473	0.512644	0.513559	0.090371	0.16088	-0.0404153
VIT_00s0199g00120	-0.276713	-0.180563	-0.260031	-0.0779987	-0.425261	-0.266978	-0.284891	-0.179652	-0.445101	-0.200368	-0.307403	-0.384084	-0.306535	-0.52841	-0.273534	-0.45845	-0.451316	-0.356847	0.00818629	0.168322	0.113658	0.143751	0.00498117	0.0455258	-0.353181	-0.184051	0.118866	0.228247	0.271878	0.377473	-0.0964588	-0.236289	0.264939	0.29996	0.500683	0.285246	0.268705	0.301127	0.350339	0.361331	0.499227	-0.135656	-0.00199763	-0.00167433	-0.0571236	-0.0411439	0.0465558	-0.0143385	-0.347551
VIT_00s0199g00130	0.273771	0.258413	0.647932	0.447609	0.377397	0.505942	0.482254	0.481606	0.658559	0.698713	0.460109	0.3936	0.528111	0.378623	0.59948	0.631908	0.55129	0.576256	0.100974	0.230908	0.365851	0.291725	0.169197	0.092668	0.127709	0.352964	-0.443803	-0.081897	0.171007	-0.438096	-0.332899	-0.251246	-0.0844236	-0.264548	-0.448763	-0.205338	-0.647711	-0.447788	-0.491069	-0.630993	-0.51937	-0.476751	-0.448954	0.0228591	-0.409976	-0.0885472	0.0236646	0.175909	0.0901835
VIT_00s0199g00140	-0.142111	-0.293909	-0.380725	-0.0124066	-0.608859	-0.65666	-0.249383	-0.29072	-0.5208	-0.465619	-0.452537	-0.464918	-0.419742	-0.413256	-0.444958	-0.605905	-0.595069	-0.606954	-0.391069	-0.13439	-0.274498	-0.251823	-0.287518	0.0653945	-0.392637	-0.349343	0.573414	0.539951	0.278262	0.550991	0.208885	0.00338256	0.287108	0.448025	0.428333	0.0654517	0.488449	0.308154	0.561484	0.541122	0.609636	0.188746	0.227652	-0.0271414	0.0783793	-0.153261	-0.148353	-0.188202	-0.269924
VIT_00s0199g00150	0.38766	0.298165	0.518951	0.53294	0.142459	0.0963985	0.213867	0.272762	0.458361	0.386733	0.180094	0.22277	0.540115	0.303248	0.529497	0.406885	0.500162	0.476444	-0.13616	-0.00160082	0.152242	0.0674354	-0.0962	-0.104477	-0.0159175	0.148534	-0.273896	0.040236	-0.0988526	-0.548112	-0.144084	-0.229065	-0.0274493	0.0630427	-0.510371	-0.358966	-0.454235	-0.213123	-0.517943	-0.42579	-0.434008	-0.218954	-0.322196	-0.101953	-0.423916	-0.263814	0.132154	0.192239	0.187294
VIT_00s0199g00160	-0.336065	-0.313351	-0.264574	-0.143298	-0.40013	-0.268961	-0.301266	-0.186444	-0.368422	-0.246296	-0.26876	-0.385885	-0.288374	-0.490192	-0.340792	-0.441635	-0.484708	-0.410852	0.100119	0.0024278	0.0568714	0.174962	0.0946638	0.070031	-0.138104	-0.0542829	0.167686	0.17167	0.0732664	0.293086	-0.00440024	-0.0913788	0.320013	0.314021	0.464254	0.310693	0.260438	0.221787	0.392379	0.359263	0.451749	-0.120721	-0.037497	0.0263143	0.0286186	0.0499007	-0.00207059	-0.137187	-0.323461
VIT_00s0199g00170	0.542533	0.392122	0.683145	0.688492	0.249104	0.256073	0.439846	0.490402	0.659549	0.672102	0.285633	0.295018	0.564836	0.428859	0.756032	0.588927	0.607582	0.567895	-0.263286	0.138286	0.173222	0.0588408	-0.213579	-0.0455597	-0.141191	0.180699	-0.32582	0.0924462	0.249369	-0.43179	-0.22893	-0.380311	-0.0443051	-0.12827	-0.619025	-0.565799	-0.661575	-0.381234	-0.55556	-0.593486	-0.559812	-0.41078	-0.505104	-0.193986	-0.6864	-0.476202	0.0336108	0.0775894	0.1011
VIT_00s0199g00190	-0.155578	-0.264185	-0.404044	-0.0680986	-0.613009	-0.667721	-0.365007	-0.303054	-0.53233	-0.411325	-0.454346	-0.496113	-0.402303	-0.446999	-0.401296	-0.628668	-0.592794	-0.613349	-0.467947	-0.154441	-0.284185	-0.208451	-0.295346	-0.020595	-0.373205	-0.288761	0.564731	0.507483	0.314502	0.616545	0.214607	-0.0368074	0.283517	0.384323	0.441219	0.029968	0.431271	0.310444	0.517131	0.522725	0.579267	0.105957	0.101715	-0.134377	-0.0276038	-0.230416	-0.0975311	-0.239925	-0.323064
VIT_00s0199g00210	-0.610862	-0.492807	-0.610568	-0.459082	-0.511872	-0.54246	-0.616353	-0.708711	-0.658854	-0.696209	-0.576246	-0.633574	-0.778198	-0.649624	-0.8539	-0.801373	-0.799125	-0.842116	0.0170042	-0.168752	-0.495505	-0.149266	0.0688424	0.0805579	0.0908622	0.0656004	0.221354	0.129483	-0.182716	0.425963	0.561405	0.531201	0.386152	0.429505	0.728117	0.569022	0.753859	0.503008	0.793165	0.759057	0.837514	0.279721	0.155081	-0.117906	0.465338	0.205116	0.0622843	-0.116355	-0.180934
VIT_00s0199g00220	-0.478959	-0.144486	-0.622255	-0.544614	-0.245153	-0.121807	-0.40406	-0.411156	-0.693471	-0.577131	-0.388331	-0.342371	-0.561905	-0.539834	-0.570749	-0.55358	-0.52887	-0.436938	0.387362	-0.00526364	-0.00876278	0.00536962	0.117652	-0.0126088	-0.142061	-0.317032	-0.028955	-0.244384	-0.134211	0.314228	0.047701	0.0709975	0.0900679	0.174608	0.636724	0.536766	0.610341	0.553708	0.427572	0.556375	0.569388	0.246478	0.413662	0.16073	0.434684	0.319392	0.189978	0.00906485	-0.205443
VIT_00s0199g00240	-0.351573	-0.0667276	-0.645493	-0.504254	-0.277965	-0.348054	-0.434304	-0.568092	-0.727754	-0.736743	-0.453509	-0.30552	-0.577644	-0.385633	-0.636233	-0.576265	-0.46229	-0.472984	0.0495548	-0.223659	-0.337329	-0.335179	-0.0842907	-0.0849474	-0.0873586	-0.365852	0.125526	-0.0818931	-0.192637	0.314348	0.344327	0.326076	-0.00686538	0.222056	0.485638	0.358506	0.752916	0.644133	0.45006	0.624437	0.573723	0.551046	0.552932	0.123387	0.559547	0.254948	0.231302	-0.0449461	-0.0464333
VIT_00s0199g00260	0.0639684	0.0615367	-0.325321	-0.229857	-0.0769461	-0.141847	-0.0224861	-0.0942384	-0.313658	-0.25417	-0.05897	0.0472602	-0.150489	0.0714465	-0.163852	-0.128788	-0.101249	-0.1267	-0.201674	-0.105881	-0.200657	-0.359888	-0.249987	-0.0689872	-0.154188	-0.414886	0.490505	0.192086	0.242953	0.515391	0.124411	0.0572124	-0.181947	-0.0843001	0.0900818	-0.129104	0.312377	0.189158	0.120606	0.196412	0.108893	0.379761	0.412872	0.148936	0.21679	-0.00443498	-0.130794	-0.130804	-0.0769896
VIT_00s0199g00270	0.0138554	0.329666	-0.0556629	-0.0985486	0.154223	0.0529218	-0.1729	-0.185526	-0.0349858	0.0360135	-0.062077	-0.0393835	0.0756282	0.0121112	0.0817506	0.0409718	0.167892	0.14668	0.0330487	-0.0851372	-0.190997	-0.0645166	-0.00495377	-0.122195	0.176817	0.368839	-0.21454	-0.188189	-0.123174	-0.254923	0.219583	0.196996	-0.219161	-0.195296	-0.0484733	0.0171834	-0.0758246	0.219862	-0.259635	-0.0103948	-0.042789	-0.0283366	-0.30359	-0.358778	-0.127967	-0.147157	0.564616	0.310489	0.155396
VIT_00s0199g00290	-0.123604	-0.439227	-0.0109008	-0.264957	0.362852	0.293579	0.237274	0.26982	0.424484	0.168242	0.111974	-0.0535239	0.162096	0.0428521	0.00838056	0.210217	-0.0489859	-0.00617366	0.18226	0.0799347	0.0694724	0.293407	0.253093	0.517284	0.278346	0.386944	-0.0467394	-0.290047	-0.267234	-0.197847	-0.00453402	0.179205	0.0850873	-0.30939	0.0475481	0.108432	-0.270788	-0.423509	0.152328	-0.0995224	-0.189866	-0.143347	-0.251029	-0.197121	-0.0202656	0.0515607	-0.323958	0.166895	0.269878
VIT_00s0199g00300	0.310069	0.0305708	0.440763	0.217052	0.31507	0.349391	0.371935	0.475832	0.589661	0.473287	0.577896	0.543108	0.459482	0.538031	0.404363	0.524649	0.451476	0.436937	0.0279234	0.161122	0.334309	0.179777	0.142022	-0.0685577	0.176534	0.00424356	0.186272	0.0390861	0.0867685	-0.110197	-0.366178	-0.191714	-0.192424	-0.289176	-0.461296	-0.267666	-0.467098	-0.567224	-0.338149	-0.543592	-0.557442	-0.140258	0.0417969	0.256246	-0.0464421	0.109473	-0.361281	0.0133316	0.132193
VIT_00s0199g00310	0.40248	0.418545	0.626593	0.853319	-0.268715	-0.0966375	0.481443	0.256703	0.178981	0.365018	0.169454	0.285082	0.279686	0.245506	0.443859	0.305287	0.369304	0.337558	-0.375938	0.250561	0.138436	-0.191726	-0.297392	-0.0497052	-0.355039	-0.294753	-0.0594191	0.594488	0.592341	0.0666403	-0.221043	-0.412349	0.112383	0.326623	-0.410653	-0.431147	-0.176177	-0.0521187	-0.315881	-0.377378	-0.151012	-0.180849	-0.0146242	0.336694	-0.346916	-0.222975	0.0787503	-0.0948836	-0.299427
VIT_00s0201g00060	-0.261965	-0.0806728	-0.438584	-0.248665	-0.365802	-0.311939	-0.305549	-0.301484	-0.615223	-0.429374	-0.32711	-0.335785	-0.413158	-0.443978	-0.388606	-0.520217	-0.46352	-0.372737	0.0523283	-0.0109263	0.017894	-0.0155883	-0.00864876	-0.0169782	-0.255182	-0.246522	0.242262	0.142002	0.107627	0.284718	-0.00118491	-0.0625033	0.0628894	0.215929	0.488058	0.303	0.386774	0.39844	0.317112	0.456041	0.489493	0.126633	0.236054	0.0418778	0.170358	0.0831767	0.201635	-0.063458	-0.17198
VIT_00s0201g00070	0.21726	0.136072	-0.270486	-0.0533336	0.136303	-0.248849	-0.348428	-0.375042	-0.157392	-0.453277	-0.39916	-0.179227	-0.213252	0.0782882	-0.167061	-0.238564	-0.0349961	-0.193312	-0.212057	-0.457998	-0.565755	-0.554194	-0.43647	-0.333741	-0.132754	-0.192781	-0.0198052	-0.137598	-0.332079	-0.28823	0.483799	0.329	-0.227116	0.0564687	-0.0938146	-0.201551	0.356645	0.350127	0.136632	0.357222	0.151107	0.56893	0.284508	-0.314533	0.132578	-0.252072	0.0612194	-0.110431	0.479244
VIT_00s0202g00030	-0.14281	-0.246231	-0.387238	-0.116563	-0.246846	-0.542449	-0.369451	-0.495849	-0.284872	-0.466016	-0.637563	-0.649378	-0.370871	-0.341859	-0.385182	-0.478839	-0.418614	-0.557771	-0.30375	-0.447231	-0.767418	-0.353301	-0.310656	0.188214	0.0396152	0.317546	0.0557462	0.0486498	-0.316315	-0.0781884	0.794857	0.541532	0.276883	0.281857	0.238799	-0.0168888	0.379341	0.385648	0.454087	0.586821	0.460512	0.220871	-0.29503	-0.612904	-0.0780475	-0.369254	0.241267	-0.0405136	0.118529
VIT_00s0202g00040	-0.410943	-0.322512	-0.354053	-0.339409	-0.245493	-0.425123	-0.378739	-0.729234	-0.396684	-0.657936	-0.32962	-0.257391	-0.50044	-0.18633	-0.733637	-0.461849	-0.382739	-0.560799	-0.0238334	-0.279435	-0.696287	-0.410609	0.0651993	0.0488772	0.461603	0.148702	0.074237	0.0176483	-0.540711	0.0777989	0.797024	0.890021	0.203446	0.353003	0.255944	0.359347	0.704394	0.403208	0.558994	0.52286	0.486472	0.58611	0.329413	0.07179	0.718372	0.382643	0.0610904	-0.113125	0.100254
VIT_00s0203g00020	0.343093	0.0508506	0.272615	0.17485	0.374954	0.148274	0.319716	0.204893	0.395125	0.0764089	0.322011	0.435824	0.279635	0.557647	0.209799	0.387111	0.393536	0.32354	-0.112457	-0.192495	0.0478775	-0.161088	-7.39455e-05	-0.0844646	0.176022	-0.0973526	0.053864	-0.0472973	-0.257433	-0.442829	-0.073478	0.110022	-0.359111	-0.16413	-0.494898	-0.280949	-0.18681	-0.333677	-0.235372	-0.270785	-0.424236	0.296078	0.331989	0.250007	0.221563	0.16844	-0.292068	-0.121471	0.51508
VIT_00s0203g00040	-0.357176	-0.505882	-0.42111	-0.323528	-0.217079	-0.505864	-0.376986	-0.457803	-0.249135	-0.562667	-0.469717	-0.508287	-0.383679	-0.372451	-0.571283	-0.506754	-0.510537	-0.595055	-0.187577	-0.434852	-0.435232	-0.088022	0.0477573	0.225967	0.162668	0.161791	0.0561219	-0.0994453	-0.565876	-0.114896	0.508491	0.507048	0.299731	0.319828	0.344244	0.277633	0.433755	0.266332	0.583762	0.561458	0.451878	0.290014	0.0728047	-0.226649	0.321997	0.111737	0.0467022	-0.0402701	0.228217
VIT_00s0203g00050	0.383439	-0.0626419	0.512956	0.325469	0.486986	0.444654	0.577175	0.720829	0.837349	0.624855	0.469947	0.380868	0.532827	0.482365	0.589203	0.640588	0.43592	0.464927	-0.0377251	0.102331	0.42974	0.330168	0.0922364	0.211918	0.0144705	0.137788	-0.0845203	-0.122416	0.0657285	-0.392973	-0.472677	-0.350954	-0.136503	-0.382693	-0.483553	-0.372218	-0.708111	-0.735439	-0.328324	-0.584349	-0.640911	-0.357582	-0.231343	-0.000227844	-0.371683	-0.126502	-0.473958	-0.0370938	0.290085
VIT_00s0203g00060	-0.13437	-0.11023	-0.0400044	-0.235822	0.0608224	0.204717	0.108258	0.0762553	-0.0842586	-0.0644368	0.3188	0.325514	0.000463843	0.13867	-0.135521	0.0973459	0.0153759	0.0889087	0.287747	0.144088	0.295917	0.118309	0.319922	0.00153672	0.198623	-0.222483	0.217801	-0.0189721	-0.0332018	0.197746	-0.280856	0.00409493	-0.145907	-0.08362	0.0344798	0.225407	0.0696753	-0.165864	-0.0334352	-0.11229	-0.112081	0.164307	0.467356	0.543945	0.480208	0.530713	-0.299526	-0.107833	-0.0218385
VIT_00s0203g00070	0.513463	0.772617	0.561546	0.421728	0.362607	0.420009	0.380354	0.316039	0.378946	0.446634	0.500462	0.721419	0.661271	0.639368	0.669119	0.683411	0.883165	0.866961	0.0310199	0.200261	0.290705	-0.112696	-0.0847039	-0.388377	0.0289501	-0.175724	-0.359854	-0.125837	0.0398379	-0.412488	-0.328303	-0.278791	-0.430561	-0.220081	-0.724592	-0.415248	-0.406292	-0.103198	-0.853097	-0.66929	-0.68039	0.0280652	0.120526	0.308027	-0.126009	0.0104295	0.314981	0.270433	0.131024
VIT_00s0203g00080	0.609013	0.628389	0.598237	0.388584	0.601216	0.642263	0.539747	0.614302	0.609329	0.679926	0.651862	0.741914	0.790874	0.735897	0.844274	0.851431	0.899315	0.953586	0.122757	0.221243	0.476254	0.0980106	-0.00420813	-0.249155	0.0422505	-0.00455754	-0.211553	-0.162869	0.153649	-0.475835	-0.53481	-0.42819	-0.57018	-0.516394	-0.752125	-0.494996	-0.729011	-0.455455	-0.928054	-0.798647	-0.86644	-0.194817	-0.0907871	0.155596	-0.339836	-0.098159	0.0807704	0.247947	0.259346
VIT_00s0203g00100	0.00504902	0.00278059	0.410903	0.125787	0.121181	0.460196	0.611124	0.565215	0.259729	0.550521	0.670321	0.520648	0.428689	0.271762	0.314477	0.510376	0.267364	0.446236	0.20384	0.553843	0.667848	0.407928	0.414532	0.263781	0.159814	0.00989535	0.169332	0.271656	0.538507	0.308394	-0.62808	-0.359789	-0.109798	-0.281035	-0.121074	0.0504269	-0.441157	-0.532883	-0.306785	-0.561272	-0.368566	-0.384974	0.00208873	0.603531	0.0104757	0.363692	-0.221491	-0.0155955	-0.321649
VIT_00s0203g00110	-0.367818	-0.597812	-0.501529	-0.56548	0.129887	-0.00151245	-0.304285	-0.108166	-0.179724	-0.340896	-0.241111	-0.410636	-0.303142	-0.372286	-0.43579	-0.378282	-0.551561	-0.440926	0.295934	-0.105299	0.0705527	0.290221	0.273024	0.204272	0.0607797	0.139551	0.16007	-0.292003	-0.36744	-0.0726924	0.0118601	0.147651	0.0423694	-0.115697	0.52509	0.433321	0.140418	-0.0429005	0.491942	0.44058	0.314531	0.0473989	0.0459118	-0.21075	0.220102	0.172687	-0.170342	-0.0964274	0.27438
VIT_00s0203g00120	-0.370278	-0.652701	-0.339775	-0.386707	0.0391152	0.037491	-0.244879	0.0170368	-0.0750837	-0.165375	-0.229956	-0.475804	-0.281061	-0.466419	-0.313765	-0.337704	-0.553034	-0.414529	0.365277	-0.0179223	0.198443	0.485269	0.305555	0.289754	-0.00802939	0.226468	0.0526163	-0.248258	-0.269063	-0.088401	-0.113884	-0.0438242	0.249088	-0.00785254	0.526971	0.412784	-0.013705	-0.145611	0.46425	0.341997	0.280906	-0.228268	-0.198955	-0.260701	-0.0196766	0.0682254	-0.18071	-0.0843856	0.110316
VIT_00s0203g00130	0.0281418	0.118525	-0.42792	-0.150054	-0.223976	-0.241883	-0.192447	-0.222438	-0.541574	-0.521579	-0.326186	-0.106277	-0.358217	-0.171352	-0.276805	-0.374138	-0.247249	-0.236651	-0.00127405	-0.0491741	-0.0827191	-0.380544	-0.345427	-0.228452	-0.489374	-0.796352	0.226238	0.0255843	0.0799985	0.334775	-0.025723	-0.161372	-0.0882906	0.220187	0.219924	-0.00260071	0.552464	0.475589	0.231121	0.394049	0.332388	0.482966	0.70547	0.251939	0.286991	0.0231929	-0.0556739	-0.0474618	-0.0934735
VIT_00s0203g00140	-0.771508	-0.575413	-0.0854984	-0.255898	-0.491413	-0.151674	-0.282915	-0.373273	-0.333594	-0.220825	-0.141945	-0.332221	-0.418588	-0.642489	-0.638092	-0.454401	-0.592634	-0.514382	0.367836	0.398005	0.100329	0.374354	0.524362	0.306887	0.266819	0.202105	-0.128418	0.138553	-0.111651	0.386213	0.102087	0.257133	0.680845	0.484528	0.66344	0.79263	0.391279	0.142422	0.614444	0.274951	0.581712	-0.169963	-0.0266351	0.291805	0.422545	0.529474	0.0103661	-0.00433729	-0.493186
VIT_00s0203g00150	-0.773542	-0.579371	-0.21219	-0.334249	-0.57058	-0.308444	-0.368481	-0.469856	-0.43709	-0.331632	-0.232773	-0.402266	-0.484836	-0.668051	-0.721038	-0.557849	-0.661135	-0.615074	0.18671	0.288786	-0.0490229	0.245254	0.421072	0.285745	0.23117	0.155364	0.0291756	0.225476	-0.0815533	0.517166	0.226975	0.337065	0.665203	0.495427	0.70556	0.75259	0.49812	0.233624	0.687316	0.38049	0.661327	-0.0558647	0.0201984	0.222846	0.453631	0.462364	0.0307797	-0.0027936	-0.491249
VIT_00s0203g00160	-0.30871	-0.216859	-0.614456	-0.383234	-0.237615	-0.359079	-0.428016	-0.476535	-0.50547	-0.622149	-0.703624	-0.653152	-0.581798	-0.563343	-0.526757	-0.594054	-0.548927	-0.561339	0.0678906	-0.228611	-0.446316	-0.217631	-0.202246	0.158848	-0.231595	-0.08172	-0.0632205	-0.189266	-0.298688	0.063697	0.460567	0.276161	0.247014	0.284195	0.529736	0.273267	0.576505	0.604017	0.55615	0.701733	0.61541	0.300402	0.0720376	-0.377766	0.13446	-0.15062	0.268445	0.0499349	0.0254143
VIT_00s0203g00170	-0.574961	-0.695508	-0.29202	-0.339978	-0.293261	-0.304929	0.00516052	-0.303254	-0.175663	-0.361476	-0.306832	-0.472539	-0.446255	-0.451853	-0.645594	-0.375167	-0.608793	-0.626452	0.0466997	-0.0541673	-0.32947	0.0730049	0.270268	0.738015	0.323729	0.354786	0.080003	0.0664693	-0.293482	0.204348	0.460382	0.578973	0.512165	0.282539	0.498566	0.479231	0.384277	0.0663125	0.724972	0.430813	0.496904	0.0618328	-0.0840797	-0.0366602	0.370404	0.28923	-0.171336	0.0144838	-0.117936
VIT_00s0203g00180	0.0124647	-0.295638	0.490748	0.0819058	0.444561	0.575536	0.624528	0.71593	0.791013	0.693588	0.618006	0.36969	0.480406	0.320765	0.399892	0.657589	0.292491	0.404958	0.246589	0.315431	0.54974	0.623956	0.514048	0.529742	0.384496	0.483016	-0.128437	-0.15426	0.0296794	-0.217599	-0.472353	-0.16082	0.0404534	-0.419349	-0.255529	0.00506217	-0.726907	-0.832292	-0.225542	-0.615043	-0.570335	-0.558878	-0.412741	0.142929	-0.185464	0.207954	-0.426023	0.0509234	0.0595668
VIT_00s0203g00190	0.232266	0.068285	0.517678	0.361386	0.228747	0.447136	0.570428	0.768849	0.636686	0.835101	0.412861	0.218115	0.489941	0.180367	0.678373	0.580384	0.344964	0.472824	-0.0472228	0.409706	0.549848	0.511165	0.10189	0.340864	-0.148064	0.267379	-0.176269	0.0578851	0.527437	0.00440591	-0.57249	-0.596319	0.0744792	-0.346971	-0.254831	-0.287601	-0.789889	-0.606358	-0.38863	-0.615658	-0.504381	-0.757854	-0.646539	-0.120164	-0.718764	-0.323541	-0.217312	0.099762	-0.223506
VIT_00s0203g00200	0.0158595	0.197491	0.571648	0.265802	-0.0275456	0.368055	0.505485	0.507729	0.385602	0.761756	0.685683	0.529918	0.457533	0.254564	0.456517	0.541784	0.412661	0.50524	0.00964031	0.597936	0.575005	0.439326	0.365176	0.154492	0.188522	0.203215	0.0313693	0.311203	0.615289	0.368559	-0.529378	-0.373869	0.0267619	-0.229814	-0.219457	-0.0336264	-0.53469	-0.453327	-0.445873	-0.684258	-0.412278	-0.59756	-0.324552	0.412815	-0.224964	0.186634	-0.0891089	0.100134	-0.520205
VIT_00s0204g00010	-0.0978213	-0.0919606	0.728682	0.464385	-0.0855786	0.0992411	0.257025	0.0432453	0.461007	0.346854	0.427965	0.382429	0.327971	0.239897	0.0923609	0.338587	0.312896	0.230886	0.0601449	0.334815	0.158582	0.193502	0.385111	0.0555314	0.492641	0.295955	-0.345511	0.195027	-0.183404	-0.243104	-0.020586	0.198819	0.355873	0.318447	-0.340236	0.123541	-0.199893	-0.358221	-0.140783	-0.496999	-0.238351	-0.180739	-0.0912511	0.448161	0.202005	0.418648	-0.0622866	-0.0117384	-0.102873
VIT_00s0204g00020	-0.125897	-0.24691	0.359864	0.142424	0.0470163	0.160551	0.141693	0.23935	0.533241	0.416105	0.117207	-0.0443928	0.194632	-0.0728417	0.18367	0.215115	0.0822964	0.0650246	0.0196251	0.22396	0.156163	0.4326	0.222306	0.296824	0.160226	0.396939	-0.39174	-0.151798	-0.111023	-0.144215	-0.101387	-0.0706367	0.458664	0.0308618	-0.06805	0.0608147	-0.3579	-0.356656	0.0189944	-0.315275	-0.190874	-0.473742	-0.520699	-0.185062	-0.304599	-0.0676301	-0.152296	0.121487	-0.104073
VIT_00s0204g00030	-0.529877	-0.640391	-0.518639	-0.296449	-0.54204	-0.53736	-0.52343	-0.522673	-0.605068	-0.615197	-0.588546	-0.703062	-0.688557	-0.718501	-0.764041	-0.817798	-0.883002	-0.86646	0.00492349	-0.0433189	-0.278681	-0.0200951	0.0198752	0.157033	-0.151096	-0.0855667	0.275581	0.248214	-0.075196	0.42008	0.351342	0.25019	0.514489	0.518262	0.758717	0.496866	0.628931	0.356831	0.870855	0.7458	0.832434	0.145724	0.132932	-0.0980239	0.280452	0.0848122	-0.128984	-0.259713	-0.216102
VIT_00s0204g00040	-0.747184	-0.536499	-0.596673	-0.54167	-0.530727	-0.507039	-0.669935	-0.691199	-0.667696	-0.627314	-0.495987	-0.611604	-0.646063	-0.731421	-0.868568	-0.802866	-0.815745	-0.819123	0.0489294	-0.0847864	-0.328217	0.0362848	0.234878	0.0732541	0.15917	0.119893	0.149818	0.0871569	-0.19338	0.493995	0.45802	0.481787	0.465139	0.414386	0.810981	0.70699	0.701924	0.498231	0.789028	0.708271	0.842728	0.15398	0.104171	-0.0498727	0.486846	0.314147	0.181967	-0.0237106	-0.302603
VIT_00s0204g00070	-0.612633	-0.407676	-0.386229	-0.533252	-0.116306	-0.00552512	-0.385494	-0.264895	-0.297803	-0.149801	-0.228772	-0.468009	-0.404106	-0.573929	-0.421469	-0.397124	-0.526763	-0.42373	0.329894	0.0345997	-0.0163763	0.398642	0.386592	0.211007	0.236067	0.487277	-0.140026	-0.262141	-0.141272	0.173917	0.145247	0.22351	0.269142	-0.0507045	0.632245	0.577037	0.120267	0.126843	0.389861	0.332513	0.404405	-0.270051	-0.369263	-0.291465	0.0740601	0.160441	0.287295	0.101025	-0.216922
VIT_00s0204g00080	-0.109723	-0.078023	-0.00417331	-0.189655	0.222442	0.428302	0.0635379	0.157313	0.0266704	0.072294	0.231697	0.188669	-0.0689803	0.036311	0.00822407	0.14651	0.0424468	0.158111	0.619787	0.312627	0.364212	0.296583	0.316928	0.0016531	0.135042	-0.031037	-0.0857231	-0.280626	-0.106193	-0.0659446	-0.317158	-0.115757	-0.0926261	-0.162497	0.0621617	0.234105	-0.0805653	-0.156336	-0.0818407	-0.115031	-0.137482	-0.0739976	0.136366	0.273806	0.182215	0.324473	-0.158337	0.0607571	-0.0208433
VIT_00s0204g00110	0.27202	-0.0190421	-0.0877854	-0.168029	0.403857	0.121233	0.104253	0.0186247	0.11132	-0.181246	0.143244	0.260661	0.0528467	0.443661	0.00604615	0.190131	0.212408	0.13443	0.0185889	-0.34846	-0.207137	-0.308373	-0.0974622	-0.0605686	0.218325	-0.132039	0.259275	-0.175897	-0.380386	-0.26052	0.179056	0.290035	-0.373813	-0.248911	-0.32411	-0.24958	0.0130834	-0.167545	-0.0916292	-0.0171818	-0.318694	0.492571	0.380099	0.0839189	0.306817	0.115669	-0.228056	-0.115692	0.506625
VIT_00s0204g00120	0.360443	0.198741	-0.283961	-0.0399603	0.261967	-0.1186	-0.30914	-0.15135	-0.0524133	-0.255494	-0.429024	-0.292202	-0.0951973	0.0360144	0.12452	-0.147806	0.0453022	-0.0417424	-0.15179	-0.418313	-0.389837	-0.330975	-0.491908	-0.282037	-0.301391	-0.069551	-0.0670577	-0.321525	-0.314488	-0.482475	0.268968	0.00814639	-0.294281	-0.12983	-0.138391	-0.376373	0.0199603	0.238386	-0.0800939	0.282634	-0.037706	0.280485	-0.0631206	-0.658496	-0.300286	-0.560125	0.223373	-0.0407943	0.543293
VIT_00s0204g00130	0.755235	0.598646	-0.0826365	0.155526	0.474161	0.0944765	-0.0490791	0.114705	0.12337	0.00189598	-0.0694241	0.175748	0.225456	0.513682	0.492929	0.225925	0.473294	0.374622	-0.233703	-0.403273	-0.261884	-0.509835	-0.647108	-0.558221	-0.34039	-0.285691	0.130493	-0.200463	-0.0220503	-0.426509	0.0702299	-0.183383	-0.690907	-0.397005	-0.526487	-0.722728	-0.182117	0.0926175	-0.492324	-0.0470662	-0.404987	0.33917	0.10757	-0.434623	-0.374145	-0.6164	0.119092	-0.0937887	0.573291
VIT_00s0204g00170	-0.279581	-0.0755154	-0.248685	0.0456093	-0.606821	-0.461879	-0.391913	-0.310452	-0.425621	-0.236034	-0.603449	-0.657735	-0.428567	-0.70441	-0.223265	-0.549272	-0.457404	-0.425083	-0.068805	0.0372618	-0.156986	0.088189	-0.189095	0.0952693	-0.395745	0.00810956	-0.142942	0.122292	0.0849961	0.208575	0.170489	-0.17083	0.5702	0.52104	0.473576	0.19131	0.273484	0.49189	0.30835	0.413398	0.544826	-0.253535	-0.384676	-0.398513	-0.36061	-0.375937	0.397172	0.132181	-0.444808
VIT_00s0204g00220	0.0654921	0.233692	0.485344	0.464027	-0.19738	0.122135	0.25461	0.240299	0.104748	0.442923	0.222438	0.133588	0.232595	-0.043328	0.352566	0.237804	0.222183	0.337433	0.112441	0.459871	0.401552	0.308978	0.122918	0.0974503	-0.105987	0.128585	-0.149621	0.339246	0.388063	-0.00459521	-0.347982	-0.416335	0.177313	0.171547	-0.103616	-0.0304879	-0.353006	-0.109951	-0.357893	-0.365182	-0.146505	-0.493638	-0.385595	0.152728	-0.388112	-0.0796283	0.265739	0.154671	-0.374056
VIT_00s0207g00010	-0.097895	0.0820595	0.0264896	-0.167172	0.0985644	0.17262	0.156097	0.103061	0.0791693	0.170857	0.219526	0.150269	0.14842	0.0505432	0.0863145	0.195391	0.166663	0.225421	0.162899	0.129556	0.162969	0.220455	0.243615	0.173987	0.243363	0.226624	-0.0828927	-0.182397	-0.0697295	-0.0240486	-0.10188	0.0462035	-0.0555582	-0.180763	-0.0329926	0.124458	-0.177956	-0.0750898	-0.223422	-0.214192	-0.186908	-0.15197	-0.146077	0.0486777	0.0312047	0.172436	0.168838	0.812154	-0.0860742
VIT_00s0207g00020	0.208636	0.150648	0.292533	0.011845	0.332194	0.353607	0.316347	0.306686	0.323534	0.282131	0.669469	0.736696	0.435494	0.615014	0.212128	0.48529	0.4442	0.431789	0.0191317	0.149294	0.316294	-0.0123965	0.214738	-0.218081	0.291276	-0.228855	0.295386	0.077033	0.142225	0.14282	-0.335686	-0.026999	-0.408706	-0.356019	-0.392094	-0.118829	-0.198556	-0.406665	-0.326102	-0.491645	-0.472597	0.162981	0.479667	0.620218	0.371389	0.449242	-0.333925	-0.0124666	0.101811
VIT_00s0207g00030	0.242114	0.244301	0.287874	0.32788	0.244032	0.143406	0.105414	0.0915698	0.272921	0.174595	-0.00801682	0.0541486	0.312596	0.153524	0.326317	0.247673	0.329102	0.313131	0.0572074	-0.0425297	0.0234003	0.00488793	-0.0737597	-0.0311519	0.00292519	0.204676	-0.447527	-0.201138	-0.251221	-0.65321	0.0294941	-0.0291294	-0.066135	0.000557093	-0.310966	-0.178437	-0.265671	-0.0158868	-0.311993	-0.186134	-0.230786	-0.0958715	-0.260929	-0.210062	-0.285699	-0.21387	0.328552	0.378345	0.291616
VIT_00s0207g00050	0.748194	0.412075	0.330494	0.258531	0.627137	0.373159	0.433772	0.532093	0.589285	0.383491	0.511725	0.677162	0.594195	0.869168	0.651863	0.666332	0.714114	0.64922	-0.227374	-0.138152	0.157077	-0.229764	-0.269963	-0.314974	-0.0472838	-0.267498	0.202863	-0.105809	0.0477484	-0.350344	-0.309559	-0.23855	-0.681073	-0.550202	-0.778276	-0.690934	-0.506061	-0.499614	-0.622108	-0.547555	-0.795544	0.193448	0.263066	0.0893047	-0.149859	-0.181696	-0.428533	-0.0720815	0.528181
VIT_00s0207g00060	0.69038	0.432269	0.196287	0.31897	0.526813	0.398408	0.273608	0.561436	0.438673	0.471696	0.15003	0.201448	0.430067	0.423724	0.740723	0.45208	0.472029	0.508775	-0.0926776	-0.0655466	0.215848	-0.0207053	-0.401811	-0.252904	-0.43248	-0.108582	-0.0133055	-0.15602	0.320173	-0.350748	-0.381992	-0.581101	-0.499088	-0.516428	-0.450295	-0.650095	-0.594543	-0.300125	-0.546547	-0.334378	-0.52713	-0.226911	-0.268116	-0.404836	-0.722421	-0.645976	-0.107172	-0.113319	0.34827
VIT_00s0207g00070	0.253077	0.260904	0.425988	0.321743	0.186948	0.279738	0.386102	0.514194	0.403781	0.551424	0.365036	0.306501	0.611206	0.239788	0.562653	0.475445	0.43687	0.541643	-0.0263589	0.252664	0.442141	0.300953	0.0691675	0.088867	-0.050502	0.138314	-0.189363	0.00380733	0.233176	-0.208423	-0.416625	-0.409995	-0.113939	-0.222068	-0.326018	-0.241923	-0.573392	-0.328501	-0.504526	-0.510888	-0.451726	-0.42476	-0.346805	0.0110611	-0.434192	-0.158643	0.112251	0.526395	-0.0811215
VIT_00s0207g00080	-0.076395	0.0460416	0.048104	0.0578184	0.0215328	0.140818	0.0023233	0.115907	0.0564589	0.24268	-0.187321	-0.332168	0.0592098	-0.311448	0.229521	0.0232892	-0.0252761	0.0829679	0.234836	0.182323	0.126479	0.35614	0.0393008	0.224532	-0.0977505	0.420372	-0.401282	-0.213294	-0.007183	-0.257519	-0.0510684	-0.222111	0.22626	-0.0351713	0.138915	0.0375532	-0.302376	0.0496631	-0.137314	-0.0155887	-6.79338e-05	-0.505905	-0.703169	-0.495852	-0.574106	-0.363057	0.455772	0.176108	-0.142512
VIT_00s0207g00090	0.595585	0.537518	0.560481	0.354086	0.607144	0.671736	0.60779	0.70057	0.63428	0.734158	0.727901	0.79511	0.641908	0.767344	0.804363	0.828784	0.802516	0.832518	0.032601	0.230986	0.506051	0.0928969	-0.00771077	-0.234941	-0.0170804	-0.116997	-0.094893	-0.111913	0.389389	-0.202581	-0.59972	-0.481948	-0.587388	-0.621283	-0.693142	-0.522529	-0.686096	-0.540395	-0.759747	-0.774616	-0.822217	-0.221675	0.0148195	0.271563	-0.293414	-0.0494529	-0.231411	-0.0155338	0.162791
VIT_00s0207g00100	-0.519044	-0.279763	-0.352603	-0.454795	-0.260564	-0.101123	-0.355455	-0.299764	-0.390546	-0.268058	-0.171044	-0.271803	-0.361154	-0.46073	-0.456986	-0.398736	-0.435444	-0.365581	0.231058	0.0786305	0.00862048	0.189507	0.278251	0.0633877	0.14384	0.0829679	-0.0661654	-0.131067	-0.0736068	0.324824	0.0574159	0.152702	0.213227	0.116333	0.512898	0.527143	0.309017	0.190878	0.336368	0.284021	0.395216	-0.046844	0.0170123	0.0359595	0.281187	0.288471	-0.0301554	0.0988272	-0.282625
VIT_00s0207g00110	-0.51169	-0.329831	-0.278245	-0.522323	-0.118721	-0.133236	-0.391752	-0.512503	-0.290025	-0.450231	0.0193961	0.0359186	-0.320817	-0.133117	-0.651895	-0.318336	-0.277144	-0.354809	0.230976	-0.0318834	-0.218407	-0.0571474	0.390191	-0.0668913	0.535561	0.0405541	0.0942993	-0.135339	-0.477246	0.218396	0.332785	0.630735	0.100642	0.137131	0.284897	0.553078	0.516302	0.174804	0.388782	0.246125	0.285632	0.429264	0.473291	0.336405	0.847951	0.685655	-0.0596686	0.0262928	0.000857197
VIT_00s0207g00120	-0.476478	-0.217986	-0.696715	-0.501204	-0.441815	-0.52227	-0.744591	-0.753367	-0.764757	-0.742135	-0.596868	-0.566502	-0.713382	-0.576418	-0.738834	-0.793055	-0.639238	-0.714137	0.0304287	-0.328742	-0.515644	-0.23741	-0.0461304	-0.190125	0.0205302	-0.0556026	0.144706	-0.0527008	-0.285925	0.33437	0.549337	0.44355	0.213149	0.358852	0.597984	0.42917	0.760129	0.687857	0.573613	0.771808	0.729433	0.365417	0.210869	-0.177422	0.410921	0.116513	0.258146	-0.124914	-0.156366
VIT_00s0207g00130	-0.202078	-0.172326	-0.468714	-0.0609787	-0.622883	-0.702354	-0.560968	-0.493045	-0.57556	-0.567237	-0.758175	-0.700012	-0.525206	-0.620262	-0.434964	-0.726134	-0.582905	-0.639261	-0.335562	-0.209912	-0.448963	-0.257808	-0.404316	-0.0462714	-0.4512	-0.256844	0.13606	0.226126	-0.0230765	0.322736	0.410292	0.0393345	0.454477	0.58098	0.466845	0.0829951	0.561276	0.593252	0.511714	0.65379	0.655403	0.173928	-0.0011577	-0.380459	-0.103615	-0.378103	0.145792	-0.191953	-0.246102
VIT_00s0207g00140	-0.573502	-0.47211	-0.367029	-0.268939	-0.507548	-0.48131	-0.372738	-0.497545	-0.403982	-0.431826	-0.468184	-0.587016	-0.596912	-0.606715	-0.628946	-0.570862	-0.635235	-0.670193	-0.0514627	-0.112405	-0.366308	0.0465325	0.146225	0.300687	0.161816	0.259406	0.00504382	0.0910178	-0.199887	0.299477	0.463024	0.427793	0.570983	0.452771	0.558129	0.474165	0.482799	0.340427	0.632694	0.519923	0.623035	0.000312185	-0.146265	-0.151313	0.224169	0.129419	0.127505	-0.0325065	-0.302432
VIT_00s0207g00150	-0.445696	-0.298626	-0.684799	-0.411119	-0.483323	-0.64844	-0.803083	-0.778386	-0.713198	-0.762808	-0.779155	-0.769976	-0.709906	-0.681967	-0.716459	-0.8772	-0.714275	-0.812176	-0.106375	-0.425186	-0.622394	-0.249308	-0.172573	-0.126577	-0.077414	0.0192596	0.0569331	-0.0524275	-0.363109	0.183584	0.662988	0.430088	0.342106	0.448982	0.617302	0.346041	0.725215	0.702447	0.660068	0.851743	0.789184	0.308257	0.0211955	-0.42387	0.208202	-0.105035	0.313735	-0.168797	-0.0747746
VIT_00s0207g00160	-0.254588	-0.195275	-0.476319	-0.114439	-0.571503	-0.579719	-0.52891	-0.381949	-0.564742	-0.4311	-0.680826	-0.720149	-0.507397	-0.683004	-0.38511	-0.706666	-0.63349	-0.626425	-0.236206	-0.127779	-0.275754	-0.0726144	-0.281858	0.0052247	-0.468814	-0.156807	0.154361	0.202061	0.12376	0.37323	0.236638	-0.101516	0.399946	0.446324	0.565614	0.152807	0.429578	0.514239	0.486287	0.62105	0.659795	-0.025286	-0.129357	-0.400932	-0.205017	-0.361866	0.142838	-0.141799	-0.294366
VIT_00s0207g00180	-0.577392	-0.538617	-0.533274	-0.393162	-0.451221	-0.518883	-0.414105	-0.597614	-0.530647	-0.64159	-0.542725	-0.611446	-0.692123	-0.585347	-0.794164	-0.674491	-0.738352	-0.783249	-0.0463057	-0.192966	-0.475369	-0.123726	0.0912164	0.281058	0.126839	0.116519	0.147084	0.108207	-0.245471	0.319789	0.553001	0.558553	0.436839	0.422919	0.627927	0.505291	0.66635	0.416733	0.772417	0.68854	0.743044	0.261783	0.112866	-0.0932393	0.438976	0.20835	0.0708129	-0.118112	-0.133866
VIT_00s0207g00190	0.576133	0.43716	0.657363	0.471314	0.439662	0.528311	0.747824	0.738077	0.611111	0.736623	0.769195	0.795242	0.763003	0.748838	0.779387	0.828384	0.765146	0.822746	-0.0959081	0.248533	0.571697	0.128034	0.0397496	-0.0778767	-0.00575457	-0.120787	0.0592849	0.14304	0.439783	-0.159213	-0.642521	-0.50251	-0.489282	-0.471744	-0.695244	-0.512602	-0.711411	-0.619854	-0.742427	-0.808996	-0.79694	-0.2562	0.0243267	0.405795	-0.270636	0.0105361	-0.252233	0.0424794	0.0882407
VIT_00s0207g00200	0.595958	0.41473	0.670468	0.517163	0.532487	0.645018	0.773159	0.86957	0.746915	0.865491	0.676259	0.654444	0.716881	0.651051	0.906649	0.870047	0.741072	0.832761	0.00361787	0.326785	0.633765	0.280177	0.0105293	0.0350303	-0.131976	-0.0161062	-0.132374	-0.0278725	0.453283	-0.278378	-0.722584	-0.654064	-0.385572	-0.524322	-0.656242	-0.54138	-0.857855	-0.662884	-0.746913	-0.819524	-0.820476	-0.474174	-0.228788	0.170068	-0.54542	-0.188179	-0.206457	0.0703175	0.103774
VIT_00s0207g00210	-0.284924	-0.0549268	0.094277	-0.13982	-0.0463491	-0.00571582	-0.0854596	-0.161885	0.15268	0.0155205	0.118821	0.115579	0.120228	-0.0148092	-0.146177	0.0494167	0.0981194	0.0217008	0.0615398	0.0476551	-0.072513	0.117563	0.290577	0.0724401	0.425491	0.253617	-0.325052	-0.242082	-0.344108	-0.0711859	0.170794	0.344739	0.2148	0.0895559	-0.0333623	0.266494	0.0803422	0.0428381	0.0276193	-0.13912	-0.024197	-0.000535645	-0.0316826	0.12838	0.285007	0.33649	0.0820614	0.717298	-0.0976888
VIT_00s0207g00220	0.0631098	0.0962679	0.0656711	0.212842	-0.340334	-0.552633	-0.24886	-0.535755	-0.215869	-0.438246	-0.157983	0.0852652	-0.118784	0.137978	-0.327002	-0.238532	0.0236807	-0.202749	-0.511641	-0.247888	-0.558458	-0.630298	-0.273029	-0.350094	0.0855276	-0.307205	0.168539	0.397011	-0.203663	0.0829048	0.522982	0.475723	0.0738648	0.490737	-0.181924	-0.0968565	0.528861	0.330657	0.171779	0.18145	0.217286	0.641882	0.532866	0.259575	0.500222	0.150202	0.0845987	-0.124695	0.108582
VIT_00s0207g00230	-0.675273	-0.292111	-0.588411	-0.396521	-0.677436	-0.592063	-0.764733	-0.827397	-0.801832	-0.677993	-0.688144	-0.723539	-0.764794	-0.830192	-0.806786	-0.885058	-0.757769	-0.801967	0.081967	-0.0625276	-0.487137	-0.103359	0.0351712	-0.0153747	0.0158796	0.0905972	-0.0298658	0.0770019	-0.183083	0.420802	0.593155	0.433713	0.537936	0.582236	0.771412	0.611381	0.792343	0.767885	0.692649	0.776663	0.915727	0.152205	-0.0257043	-0.200658	0.306518	0.0995778	0.405481	-0.00245819	-0.413415
VIT_00s0207g00240	0.30688	0.299209	-0.132811	0.0315305	0.112073	0.0264174	-0.00445648	0.156686	-0.131437	0.065582	-0.146654	-0.0948146	0.159048	-0.0136196	0.28402	0.0105592	0.0778855	0.152548	-0.190105	-0.0552839	0.0699763	-0.11537	-0.355374	-0.0995703	-0.465366	-0.2271	0.130977	0.0621076	0.319756	0.0310113	-0.147985	-0.390927	-0.271942	-0.223665	-0.018973	-0.319575	-0.141129	0.141058	-0.188223	0.055439	-0.0571961	-0.029068	-0.0953051	-0.287605	-0.432031	-0.475737	0.195624	-0.0585023	0.0622302
VIT_00s0207g00250	0.206666	0.341686	-0.293156	0.0386757	-0.0465647	-0.124242	-0.224622	-0.0404325	-0.261194	-0.0947151	-0.471544	-0.391	-0.0709484	-0.272997	0.181939	-0.224954	-0.0741494	-0.0239704	-0.142493	-0.147359	-0.10965	-0.149333	-0.465249	-0.173741	-0.608048	-0.172053	-0.100582	-0.100496	0.202504	-0.069463	0.0156544	-0.3612	-0.0913385	-0.0220896	0.148014	-0.227876	0.0337277	0.447127	-0.0748169	0.292678	0.200366	-0.0772793	-0.253044	-0.548459	-0.552374	-0.644392	0.455901	0.191469	0.0105503
VIT_00s0207g00260	0.40912	0.495316	0.566743	0.713314	0.00419615	0.0441912	0.17241	0.0904794	0.309458	0.262461	0.0215269	0.212834	0.311626	0.262078	0.470396	0.325331	0.518073	0.423003	-0.0953278	0.186916	-0.0348736	-0.190604	-0.299096	-0.235556	-0.198082	-0.0932578	-0.460134	0.0902178	-0.0105658	-0.441514	0.00368074	-0.195135	0.0993986	0.290773	-0.517216	-0.385505	-0.193612	0.0616583	-0.429252	-0.353391	-0.281495	-0.0516433	-0.137237	-0.0151129	-0.346821	-0.307694	0.290833	0.0454225	0.0300647
VIT_00s0207g00270	0.48432	0.441915	0.548144	0.393936	0.342412	0.211209	0.342667	0.203864	0.578869	0.421722	0.420642	0.540322	0.536897	0.685602	0.522716	0.627729	0.746009	0.602031	-0.252216	-0.0681772	-0.138505	-0.222361	-0.117943	-0.16177	0.31189	0.237605	-0.114283	0.0342198	-0.0874382	-0.419493	0.1013	0.149936	-0.292497	-0.229302	-0.749767	-0.486456	-0.415141	-0.292975	-0.599987	-0.566929	-0.63884	0.0561149	-0.15994	-0.00719802	-0.143225	-0.129486	0.0955541	0.148975	0.295076
VIT_00s0207g00280	0.696849	0.537541	0.582365	0.478573	0.609085	0.665859	0.764792	0.792085	0.657731	0.68963	0.586002	0.686829	0.692767	0.728052	0.880502	0.881197	0.814452	0.890224	0.0761165	0.248729	0.504243	0.0499651	-0.140854	-0.0443558	-0.198152	-0.197455	-0.147282	-0.0986358	0.326718	-0.36736	-0.618942	-0.57231	-0.500283	-0.495806	-0.72686	-0.606195	-0.710498	-0.514443	-0.78026	-0.747506	-0.832465	-0.195732	-0.0141073	0.207776	-0.426099	-0.203741	-0.172141	0.104346	0.229443
VIT_00s0211g00010	0.324662	0.285167	-0.27402	-0.0300712	0.225109	-0.0517485	-0.259885	-0.109419	-0.135299	-0.220023	-0.39203	-0.242626	-0.0606777	-0.0116368	0.155077	-0.119767	0.0599413	0.0417055	-0.0685861	-0.320734	-0.212752	-0.26259	-0.433103	-0.258855	-0.383854	-0.150311	-0.0912937	-0.263173	-0.190662	-0.419081	0.110389	-0.122928	-0.310858	-0.119071	-0.074626	-0.28214	0.010645	0.280865	-0.170709	0.236949	-0.0210275	0.219376	-0.0251999	-0.541027	-0.307627	-0.509354	0.27617	-0.0399948	0.456853
VIT_00s0211g00030	-0.584486	-0.247306	-0.58119	-0.620663	-0.063884	0.00927433	-0.52728	-0.528374	-0.483997	-0.472887	-0.502516	-0.556879	-0.601642	-0.613535	-0.564335	-0.505277	-0.510259	-0.472405	0.570122	-0.00928331	-0.295575	0.0920419	0.189677	0.146425	0.171825	0.289706	-0.349594	-0.503442	-0.431759	0.00460091	0.416659	0.416467	0.251515	0.0814445	0.629723	0.598016	0.464879	0.505801	0.452368	0.556748	0.525821	0.0899316	-0.131117	-0.335763	0.242429	0.134774	0.392265	0.157919	-0.0788909
VIT_00s0211g00040	-0.458283	-0.125874	-0.428112	-0.264861	-0.440202	-0.529917	-0.658989	-0.720097	-0.515412	-0.526198	-0.701373	-0.686952	-0.497801	-0.646144	-0.533653	-0.653046	-0.481609	-0.578435	-0.108101	-0.177657	-0.615959	-0.177644	-0.124967	0.018069	0.0419488	0.258515	-0.290619	-0.101785	-0.363326	0.0656761	0.712044	0.478383	0.477651	0.449502	0.477979	0.337811	0.553564	0.683737	0.461641	0.599279	0.637402	0.14268	-0.260293	-0.504977	0.0556203	-0.167411	0.582937	0.183161	-0.169971
VIT_00s0211g00050	0.162121	0.151183	0.600076	0.472483	0.0164747	0.149123	0.255606	0.213578	0.456706	0.485538	0.423917	0.368372	0.318628	0.31919	0.347643	0.390311	0.397382	0.364277	-0.0173383	0.264592	0.23045	0.188978	0.188686	-0.0890123	0.225349	0.267556	-0.0743238	0.240152	0.117376	-0.192635	-0.185202	-0.0909004	0.0595338	0.0534793	-0.375311	-0.102871	-0.385838	-0.340555	-0.355432	-0.488088	-0.323177	-0.317826	-0.258824	0.182771	-0.16126	0.0622061	-0.000826077	-0.0292683	-0.0470236
VIT_00s0211g00060	-0.756185	-0.503433	-0.187083	-0.394663	-0.384307	-0.279636	-0.339166	-0.574136	-0.305542	-0.370014	-0.146368	-0.260462	-0.488118	-0.440605	-0.741988	-0.436146	-0.489504	-0.549946	0.118961	0.034539	-0.285154	0.0990836	0.475917	0.263486	0.547007	0.379158	-0.125184	0.0296831	-0.333765	0.282597	0.481754	0.703421	0.507074	0.354856	0.494024	0.705916	0.500676	0.212457	0.613376	0.32319	0.519968	0.118164	0.0436521	0.193378	0.649733	0.589397	0.111358	0.0581802	-0.274898
VIT_00s0211g00080	0.0121789	0.076391	0.253532	0.298069	-0.00620969	0.138128	0.0512872	0.107853	0.189436	0.269075	-0.118566	-0.201348	0.0412498	-0.178283	0.256934	0.10858	0.0839842	0.138234	0.21004	0.114317	0.100916	0.272201	0.0285345	0.140166	-0.0775092	0.366469	-0.483419	-0.127502	-0.0412251	-0.384556	-0.0679483	-0.183126	0.256807	0.124278	-0.0342064	0.00688809	-0.295613	-0.0396264	-0.188641	-0.131368	-0.0574759	-0.446525	-0.589978	-0.345848	-0.488856	-0.288385	0.281876	0.232407	-0.0678939
VIT_00s0211g00110	0.791801	0.60941	0.28583	0.368496	0.473781	0.322805	0.362898	0.497811	0.344946	0.349202	0.363817	0.554141	0.481297	0.693386	0.710992	0.551329	0.667995	0.669046	-0.169192	-0.0298096	0.251891	-0.230729	-0.384032	-0.406344	-0.329905	-0.418628	0.166418	-0.00711095	0.267676	-0.303487	-0.442228	-0.507879	-0.695255	-0.429478	-0.669649	-0.694246	-0.462586	-0.288804	-0.720938	-0.466478	-0.664094	0.100121	0.217079	0.0590349	-0.336715	-0.331849	-0.189313	-0.0608152	0.39098
VIT_00s0211g00120	0.0283682	0.294372	-0.0822708	-0.087534	0.0714156	0.0768775	-0.0795772	0.0566514	-0.0522263	0.112714	-0.0405246	-0.0451518	0.207563	-0.0876734	0.19509	0.0558342	0.136038	0.217631	0.0198711	-0.0391785	0.117179	0.116245	-0.0250666	-0.0555595	-0.0978004	0.100155	-0.213035	-0.231599	0.0347966	-0.123902	-0.109587	-0.174409	-0.12084	-0.159873	0.0130209	-0.00933166	-0.16671	0.167688	-0.284505	-0.073168	-0.0748804	-0.183768	-0.252281	-0.238108	-0.271372	-0.189829	0.426742	0.87558	-0.050454
VIT_00s0211g00130	-0.498014	-0.133782	-0.589728	-0.392666	-0.449915	-0.418892	-0.632955	-0.57661	-0.655423	-0.501723	-0.623428	-0.658624	-0.581837	-0.723106	-0.563881	-0.707493	-0.623303	-0.605842	0.0370953	-0.117759	-0.311233	-0.0310632	-0.020819	-0.0398165	-0.160886	0.0619783	-0.0365459	-0.0165287	-0.0167178	0.322888	0.345928	0.182475	0.287077	0.306967	0.700422	0.474939	0.56962	0.681253	0.501074	0.662134	0.763242	0.0356312	-0.0864146	-0.315552	0.0861921	-0.0550372	0.447996	0.0679307	-0.270405
VIT_00s0211g00140	0.802087	0.694246	0.294045	0.399484	0.467701	0.366419	0.362009	0.506026	0.319122	0.362025	0.335907	0.547415	0.428165	0.651192	0.741319	0.540092	0.679032	0.70015	-0.125456	-0.0473546	0.312925	-0.21474	-0.410909	-0.474233	-0.438289	-0.49957	0.0786624	-0.0497836	0.327473	-0.316268	-0.526897	-0.620271	-0.686196	-0.42171	-0.643299	-0.685994	-0.456085	-0.215853	-0.734776	-0.469416	-0.638115	0.0667328	0.239972	0.0646762	-0.385397	-0.361695	-0.0443897	-0.0399921	0.370769
VIT_00s0211g00150	0.671385	0.499166	0.31102	0.408328	0.397665	0.414888	0.385457	0.654485	0.405678	0.554787	0.246333	0.285163	0.434642	0.378728	0.811028	0.506597	0.517813	0.624953	-0.00557939	0.158855	0.447862	0.125719	-0.318697	-0.191316	-0.50619	-0.215883	-0.0278246	-0.0811195	0.416021	-0.282673	-0.621122	-0.78892	-0.418271	-0.416883	-0.454215	-0.595059	-0.665235	-0.336566	-0.666563	-0.467083	-0.583666	-0.353704	-0.239863	-0.229595	-0.741233	-0.557751	-0.053404	0.031923	0.164929
VIT_00s0211g00160	-0.0748107	0.0873238	-0.254637	-0.257048	0.117095	0.104962	-0.122122	-0.0245246	-0.116306	-0.0275823	-0.169672	-0.216021	0.020287	-0.200545	0.0305461	-0.06527	-0.0390397	0.0282731	0.20436	-0.066118	0.0217461	0.124442	0.00683193	0.0494677	-0.0635032	0.144611	-0.188511	-0.338382	-0.0974647	-0.134044	-0.00526194	-0.0570803	-0.0703568	-0.167338	0.163731	0.0915767	-0.0337991	0.209711	-0.0645132	0.130672	0.062485	-0.120004	-0.231817	-0.303105	-0.186861	-0.156317	0.322969	0.654726	0.00888221
VIT_00s0211g00170	-0.172169	-0.0566895	-0.361273	0.0057232	-0.396398	-0.453711	-0.470684	-0.373697	-0.446893	-0.36183	-0.684946	-0.69213	-0.379455	-0.613536	-0.271538	-0.593917	-0.492606	-0.489241	-0.135377	-0.168872	-0.296452	-0.097071	-0.283322	-0.0187644	-0.419474	0.00209675	-0.0926528	0.0967087	0.050034	0.0365903	0.29242	-0.0478265	0.304358	0.38364	0.464135	0.134013	0.351817	0.55834	0.392724	0.574556	0.624406	-0.0538662	-0.248461	-0.489343	-0.292347	-0.41789	0.368814	-0.0681582	-0.112027
VIT_00s0211g00180	0.828669	0.754278	0.328296	0.431801	0.456461	0.339137	0.327627	0.447729	0.340772	0.354053	0.345661	0.584442	0.455018	0.70931	0.751014	0.56241	0.745628	0.72334	-0.130762	-0.0476977	0.217103	-0.282326	-0.436921	-0.53062	-0.35463	-0.449476	0.049905	-0.0669768	0.238156	-0.358646	-0.424687	-0.524861	-0.6879	-0.387135	-0.726421	-0.722043	-0.438889	-0.188952	-0.795167	-0.495023	-0.680068	0.11132	0.218899	0.0390365	-0.363025	-0.367436	-0.0406855	0.00373454	0.370634
VIT_00s0211g00190	-0.308829	0.0403653	-0.577344	-0.345155	-0.335545	-0.382963	-0.602808	-0.642605	-0.665775	-0.657138	-0.700602	-0.548515	-0.583186	-0.5537	-0.504245	-0.652116	-0.44151	-0.510611	0.0472611	-0.162437	-0.524818	-0.357603	-0.294403	-0.13354	-0.226031	-0.209	-0.21655	-0.226223	-0.253457	0.156789	0.518335	0.269699	0.214942	0.32957	0.457882	0.226888	0.679398	0.773716	0.414879	0.641389	0.599086	0.376892	0.160032	-0.312858	0.170667	-0.141645	0.420361	0.0254739	-0.138813
VIT_00s0214g00040	-0.151726	-0.291386	-0.2782	-0.19342	-0.240201	-0.353091	0.0437296	-0.151473	-0.270425	-0.379916	-0.146261	-0.130262	-0.280932	-0.113171	-0.362996	-0.258902	-0.318197	-0.331553	-0.211799	-0.160073	-0.182638	-0.176008	-0.0384496	0.232987	0.00292593	-0.223331	0.346068	0.150245	-0.0917762	0.273101	0.149687	0.19892	0.0667499	0.170211	0.169157	0.0666812	0.323352	0.0594212	0.332044	0.280492	0.217745	0.303623	0.362722	0.183687	0.362828	0.202985	-0.250515	-0.0580494	-0.0324952
VIT_00s0214g00060	0.386734	0.214477	-0.360236	0.0548094	0.053892	-0.0850097	-0.163657	0.165025	-0.245266	-0.173625	-0.453866	-0.347433	-0.100063	-0.19172	0.226471	-0.231967	-0.143772	-0.045946	-0.0868339	-0.152949	0.10321	-0.120064	-0.566537	-0.242471	-0.859505	-0.550991	0.0863993	-0.127207	0.200684	-0.0983106	-0.284885	-0.646356	-0.223887	-0.0550429	0.10801	-0.345789	-0.0100898	0.24629	-0.0410558	0.302651	0.0998989	0.025054	0.0731908	-0.440685	-0.530675	-0.656067	-0.00803167	-0.155982	0.17523
VIT_00s0214g00090	0.461596	0.357546	0.463762	0.169323	0.656039	0.564852	0.52472	0.494981	0.684558	0.589249	0.641849	0.655261	0.625318	0.760034	0.609898	0.787914	0.739161	0.719025	0.0380457	0.00137679	0.184587	0.035298	0.102835	-0.0359573	0.366514	0.314318	-0.0550302	-0.174278	0.0147666	-0.423787	-0.218357	-0.000307775	-0.557955	-0.627305	-0.674482	-0.392226	-0.647377	-0.557305	-0.682016	-0.673144	-0.788179	-0.102548	-0.167587	0.0286276	-0.148273	0.00117915	-0.11236	0.176741	0.394252
VIT_00s0214g00130	0.263758	0.00222457	-0.0998561	0.0885273	0.191211	-0.042732	-0.0672193	0.176526	0.167833	0.146432	-0.271265	-0.373543	0.159106	-0.0768824	0.314644	-0.00837208	-0.0104655	0.0024914	-0.17778	-0.272095	-0.109443	0.0863877	-0.279566	0.0954321	-0.240668	0.309888	-0.0209466	-0.149601	-0.039459	-0.380605	0.100207	-0.187871	-0.0416511	-0.191277	-0.0418145	-0.339967	-0.34378	-0.0340083	-0.0814053	0.122778	-0.0760734	-0.283408	-0.6205	-0.743559	-0.704033	-0.673606	0.199288	0.0797893	0.265017
VIT_00s0214g00150	0.430909	0.230624	-0.129986	0.0643961	0.35689	0.0479766	-0.0518364	0.182893	0.187724	0.101282	-0.213358	-0.191428	0.226588	0.125593	0.388846	0.10116	0.169965	0.159277	-0.185539	-0.412666	-0.112303	-0.0692612	-0.371701	-0.155524	-0.30056	0.119953	-0.0917497	-0.279003	-0.0892866	-0.489383	-0.00478759	-0.223677	-0.354597	-0.311722	-0.215301	-0.432963	-0.32171	-0.00107987	-0.296391	0.0570935	-0.213507	-0.0896467	-0.356148	-0.664865	-0.57975	-0.632227	0.0642366	0.086743	0.450319
VIT_00s0214g00160	0.221773	0.362897	0.560495	0.125598	0.504421	0.657266	0.484846	0.447108	0.565647	0.572158	0.820329	0.873364	0.609742	0.69362	0.492428	0.784754	0.758088	0.768411	0.261476	0.311074	0.463349	0.194013	0.368887	-0.139627	0.446992	0.0715357	-0.192116	-0.198259	0.0187041	-0.205022	-0.435089	-0.0844952	-0.395508	-0.456181	-0.585322	-0.128162	-0.492369	-0.485464	-0.663384	-0.78973	-0.749818	-0.0891497	0.151694	0.553045	0.18272	0.446665	-0.0540123	0.182218	0.0923133
VIT_00s0215g00020	0.292171	0.0405858	-0.299302	-0.16688	0.408513	0.0900038	-0.102218	0.111647	0.080484	-0.0362364	-0.250827	-0.269971	0.0793816	0.0459743	0.193594	0.00174805	-0.00571309	0.0203198	-0.0445547	-0.38378	-0.155758	-0.0822894	-0.287884	-0.0354656	-0.200904	0.15136	0.0487987	-0.296274	-0.135177	-0.401647	0.079754	-0.0711544	-0.378184	-0.388345	-0.0306215	-0.279786	-0.212474	-0.0146619	-0.0953237	0.194512	-0.0981822	0.0107653	-0.278126	-0.668046	-0.412008	-0.527808	0.0138025	0.0347427	0.506545
VIT_00s0215g00030	0.382746	0.494767	0.359697	0.159208	0.443829	0.665664	0.491457	0.714944	0.39723	0.723217	0.652169	0.622026	0.530616	0.464644	0.719292	0.665354	0.585769	0.745449	0.151744	0.374727	0.708954	0.325784	0.10739	-0.159125	-0.159142	-0.125286	-0.0228012	-0.0987463	0.60654	0.0782516	-0.804704	-0.691089	-0.503452	-0.632654	-0.371024	-0.295105	-0.678289	-0.450168	-0.709125	-0.688875	-0.649095	-0.435557	-0.0921749	0.23418	-0.381482	-0.0484389	-0.083168	0.18857	-0.111283
VIT_00s0215g00040	-0.431128	-0.230602	-0.318182	-0.533007	0.199105	0.530455	-0.00979657	0.126244	-0.19739	0.0368296	0.0821412	-0.0961431	-0.229161	-0.330033	-0.184376	-0.0665012	-0.299519	-0.0815589	0.83097	0.339104	0.438817	0.505474	0.471945	0.241054	0.0859516	0.126141	-0.121711	-0.404637	0.0935648	0.199861	-0.354194	-0.155046	-0.03379	-0.329885	0.518507	0.535947	-0.00198505	-0.021952	0.161632	0.114446	0.158503	-0.286005	-0.050872	0.127543	0.126596	0.346656	-0.0390132	-0.0830727	-0.209751
VIT_00s0215g00050	0.0182058	0.16527	-0.016168	0.0591866	-0.160392	-0.038106	0.0450877	-0.0190208	-0.239197	-0.0382672	-0.0443828	0.0461569	-0.155704	-0.0533464	-0.030005	-0.0440894	-0.0379204	-0.0149412	-0.127393	0.207993	-0.00372949	-0.189397	-0.17705	-0.0483177	-0.255057	-0.344907	0.0610494	0.248213	0.401219	0.440278	-0.0542481	-0.142177	0.00575444	0.0746232	0.073749	-0.0526819	0.183345	0.150338	0.0202302	0.0142874	0.104329	0.100319	0.205523	0.184978	0.0354806	-0.0389744	-0.0440495	-0.165357	-0.273533
VIT_00s0215g00070	-0.479009	-0.357461	-0.35985	-0.639724	0.0908491	0.0457774	-0.270857	-0.181573	-0.110737	-0.165027	-0.00409067	-0.165105	-0.21616	-0.272281	-0.372128	-0.187938	-0.288371	-0.213525	0.237534	-0.0769957	0.0842022	0.36855	0.485778	0.172541	0.389185	0.344874	-0.00747723	-0.357887	-0.368423	0.0264704	0.00187741	0.273966	0.0207489	-0.186675	0.387531	0.528278	0.069468	-0.0125579	0.209541	0.16517	0.134651	-0.0481029	-0.0489643	-0.0806927	0.334742	0.38982	0.0851515	0.267783	0.10424
VIT_00s0215g00090	-0.180745	-0.27695	-0.345423	-0.22908	-0.0310799	-0.153722	-0.260475	-0.184808	-0.122248	-0.147006	-0.455255	-0.603467	-0.318822	-0.405572	-0.173966	-0.300167	-0.376352	-0.366162	0.0296612	-0.141281	-0.323827	0.0861043	-0.0710708	0.292689	-0.0134173	0.441311	0.000925175	-0.110678	-0.142427	-0.080651	0.362271	0.181039	0.209723	-0.0133602	0.358884	0.103752	0.04573	0.171857	0.294242	0.405863	0.297115	-0.168866	-0.543723	-0.669638	-0.322454	-0.382755	0.258224	-0.0487209	0.0830684
VIT_00s0215g00110	-0.425991	-0.101017	-0.0189143	-0.440468	0.350378	0.716784	0.093752	0.204939	0.122877	0.310652	0.294208	0.108771	0.00910818	-0.168909	0.0129688	0.215746	0.00539644	0.185069	0.871302	0.509369	0.500704	0.633329	0.624653	0.244937	0.33435	0.391581	-0.483161	-0.587749	-0.0671894	-0.0315676	-0.380737	-0.0800558	-0.0139035	-0.419513	0.279394	0.524948	-0.244977	-0.181769	-0.0967808	-0.217381	-0.121957	-0.436191	-0.256587	0.107976	0.0810884	0.415636	0.0649831	0.197089	-0.193805
VIT_00s0216g00020	-0.711936	-0.398655	-0.469893	-0.337833	-0.606302	-0.437419	-0.456108	-0.589227	-0.636903	-0.47742	-0.588672	-0.71557	-0.656215	-0.815856	-0.698152	-0.683111	-0.739141	-0.712869	0.126898	0.0393283	-0.349922	0.0674974	0.153921	0.320143	0.0508057	0.251071	-0.0837711	0.113669	-0.0542975	0.443041	0.479458	0.375927	0.634466	0.51265	0.774306	0.618629	0.603886	0.573108	0.669952	0.647367	0.828745	-0.0582121	-0.216865	-0.155942	0.187131	0.112775	0.373806	0.0146147	-0.495927
VIT_00s0216g00030	0.104244	-0.239874	0.287054	0.0570408	0.252954	0.0792528	0.177157	0.0943554	0.457685	0.159883	0.283753	0.224387	0.395152	0.361753	0.0471267	0.269059	0.190356	0.104804	-0.187545	-0.153869	-0.0776939	-0.0134641	0.150639	0.116481	0.389424	0.264011	0.157282	0.112592	-0.234247	-0.256885	0.121748	0.308957	-0.0442902	-0.128581	-0.277841	-0.0810012	-0.218845	-0.431877	-0.0126219	-0.242479	-0.269641	0.0983968	-0.0214956	0.0518494	0.144376	0.137703	-0.25936	-0.0518905	0.396441
VIT_00s0216g00040	0.72735	0.84292	0.335179	0.398238	0.349594	0.319297	0.389944	0.454464	0.306914	0.463993	0.336651	0.552816	0.501325	0.605772	0.789257	0.579492	0.772493	0.756601	-0.239825	0.0491083	0.182943	-0.253338	-0.443998	-0.40662	-0.361616	-0.345468	-0.0686269	-0.0482442	0.42023	-0.14896	-0.373107	-0.53174	-0.590083	-0.422383	-0.669358	-0.71786	-0.452075	-0.0909242	-0.804463	-0.536804	-0.644691	-0.0201467	0.0324033	-0.0157259	-0.469836	-0.42572	0.134629	0.185234	0.0949215
VIT_00s0216g00060	0.637209	0.612219	0.674864	0.450478	0.583083	0.61473	0.619593	0.650147	0.680386	0.690934	0.713198	0.834841	0.813832	0.819023	0.849805	0.904864	0.941308	0.967661	0.0310509	0.239509	0.474503	0.054248	-0.0164532	-0.233786	0.0580258	-0.0872888	-0.196935	-0.11824	0.150511	-0.445657	-0.537887	-0.409844	-0.530279	-0.475845	-0.829294	-0.541985	-0.711696	-0.505274	-0.902651	-0.853927	-0.911844	-0.138701	0.0158395	0.285319	-0.26582	-0.0374086	-0.00894131	0.169699	0.249168
VIT_00s0216g00070	-0.251791	-0.14389	-0.363474	0.0608324	-0.626832	-0.649745	-0.527895	-0.548863	-0.531778	-0.486526	-0.74139	-0.733094	-0.521555	-0.639493	-0.427621	-0.691941	-0.559916	-0.623482	-0.20799	-0.230247	-0.502138	-0.217392	-0.315673	-0.0231138	-0.315069	0.006641	0.00222528	0.255296	-0.00168179	0.198255	0.50428	0.144625	0.494348	0.623419	0.464806	0.159774	0.530765	0.622717	0.485499	0.647686	0.721857	0.040085	-0.216739	-0.417279	-0.156594	-0.366232	0.328767	-0.158626	-0.272075
VIT_00s0218g00010	-0.778547	-0.496598	0.0644536	-0.339311	-0.23568	0.109236	-0.0407582	-0.101569	-0.0236267	0.175096	0.247522	-0.0790178	-0.115729	-0.397994	-0.384379	-0.0789176	-0.319711	-0.198129	0.3908	0.402169	0.274508	0.645661	0.825388	0.457416	0.644101	0.699569	-0.141507	0.0513427	-0.0285716	0.321289	-0.0280179	0.325341	0.460805	0.0689953	0.477274	0.78614	-0.0412602	-0.196857	0.262017	-0.0861323	0.227247	-0.480093	-0.398843	0.222065	0.311315	0.616258	0.0585877	0.236761	-0.48534
VIT_00s0218g00030	0.023667	-0.156512	-0.0640996	-0.252385	0.472044	0.413369	0.153367	0.39385	0.288108	0.27318	0.20696	0.0482409	0.20698	0.072467	0.190076	0.216966	0.0287026	0.145813	0.191727	-0.046825	0.368936	0.380019	0.240351	0.170144	0.0185596	0.194265	-0.0534326	-0.341301	0.0386246	-0.17587	-0.370173	-0.213152	-0.256732	-0.530733	0.0398998	0.0374521	-0.409626	-0.37815	-0.0720092	-0.142536	-0.231147	-0.284579	-0.195677	-0.158976	-0.176515	-0.00403421	-0.181671	0.03592	0.247405
VIT_00s0218g00050	-0.421073	-0.373919	-0.75861	-0.423992	-0.497879	-0.647147	-0.718302	-0.739242	-0.787958	-0.843629	-0.818975	-0.807881	-0.766525	-0.710141	-0.778935	-0.902013	-0.804428	-0.842151	-0.0397836	-0.367457	-0.591615	-0.290684	-0.207933	0.0179351	-0.182837	-0.0857407	0.238261	0.0701737	-0.28143	0.254803	0.613123	0.400802	0.313858	0.479076	0.692349	0.381116	0.774326	0.680951	0.726432	0.92215	0.847621	0.382133	0.130832	-0.375586	0.25468	-0.108355	0.180849	-0.0981757	-0.0424419
VIT_00s0218g00070	0.0698026	-0.149177	0.28414	0.00305064	0.578797	0.615748	0.276839	0.413854	0.526433	0.325353	0.351082	0.265859	0.318515	0.243533	0.258539	0.41938	0.244497	0.323096	0.541111	0.184395	0.464271	0.428014	0.36734	0.110314	0.197446	0.17534	-0.407787	-0.503684	-0.338828	-0.580532	-0.409743	-0.144383	-0.118333	-0.310001	-0.210287	0.0847488	-0.438187	-0.492035	-0.181015	-0.351413	-0.413667	-0.208984	-0.0422887	0.109813	0.00172903	0.244698	-0.270194	-0.0149823	0.360784
VIT_00s0218g00080	-0.200302	-0.126448	-0.0737508	0.245543	-0.45371	-0.369624	-0.338807	-0.398862	-0.32802	-0.312537	-0.552625	-0.54654	-0.438054	-0.513956	-0.286653	-0.465419	-0.395636	-0.428045	0.0761912	-0.0443994	-0.277691	-0.0737559	-0.147677	0.0309859	-0.217335	0.0551451	-0.261875	0.149499	-0.102462	-0.103622	0.318841	0.0721817	0.500813	0.624265	0.308842	0.191344	0.352864	0.430331	0.35719	0.428226	0.535957	-0.0583849	-0.208171	-0.219472	-0.137399	-0.208293	0.26178	-0.184042	-0.174858
VIT_00s0218g00090	-0.459817	-0.173452	-0.630273	-0.299745	-0.578902	-0.552929	-0.707473	-0.643239	-0.764591	-0.587627	-0.776529	-0.820371	-0.656633	-0.812951	-0.579417	-0.831985	-0.718983	-0.715961	0.0215062	-0.172483	-0.418826	-0.0790172	-0.147507	-0.0525043	-0.23612	0.0620623	-0.00567477	0.0401702	-0.0602989	0.297998	0.452245	0.167032	0.391318	0.455421	0.716619	0.393004	0.609249	0.738702	0.533323	0.789645	0.833264	0.0169838	-0.192636	-0.448619	-0.0394285	-0.217102	0.440795	-0.0770885	-0.326722
VIT_00s0218g00110	-0.380153	-0.281502	-0.695131	-0.3946	-0.480401	-0.645235	-0.693228	-0.756371	-0.80471	-0.854423	-0.729372	-0.646673	-0.683846	-0.595915	-0.774845	-0.869972	-0.724893	-0.798303	-0.140427	-0.350894	-0.58757	-0.418063	-0.241306	-0.108904	-0.174145	-0.254486	0.234405	0.112159	-0.220231	0.32198	0.615876	0.419777	0.23887	0.455136	0.617909	0.327366	0.852275	0.71446	0.737639	0.870711	0.827363	0.518349	0.350146	-0.169362	0.390494	-0.00515183	0.183783	-0.197319	-0.0577948
VIT_00s0218g00130	-0.719006	-0.165525	-0.0775201	-0.217654	-0.580345	-0.32387	-0.544016	-0.665911	-0.405551	-0.267267	-0.217572	-0.286036	-0.365956	-0.562229	-0.56892	-0.479791	-0.345769	-0.405913	0.170517	0.185301	-0.224904	0.140452	0.373884	-0.0594274	0.401386	0.343358	-0.361604	0.0191062	-0.262094	0.273744	0.405128	0.464613	0.594954	0.528358	0.453311	0.666666	0.468246	0.449516	0.338899	0.235882	0.528823	-0.0671403	-0.151463	0.0825903	0.389702	0.407182	0.44993	0.252771	-0.528961
VIT_00s0218g00140	-0.375479	0.000888663	-0.175388	-0.040518	-0.500197	-0.429477	-0.597375	-0.545501	-0.353494	-0.232881	-0.531217	-0.562545	-0.2912	-0.600163	-0.283015	-0.515902	-0.311937	-0.382164	-0.0675937	-0.0315553	-0.369154	0.0106728	-0.0791597	-0.120402	-0.0316308	0.286645	-0.373848	-0.0337667	-0.18182	0.0562498	0.462164	0.192543	0.536711	0.471343	0.370926	0.272889	0.318634	0.563686	0.245516	0.361244	0.501275	-0.153988	-0.455156	-0.463175	-0.189133	-0.246762	0.605067	0.259565	-0.354453
VIT_00s0218g00150	-0.649335	-0.387993	0.199554	-0.152599	-0.147776	0.307653	0.0157813	0.133315	0.111339	0.398032	0.2082	-0.145053	-0.00440311	-0.481416	-0.102314	0.0248471	-0.239451	-0.0377036	0.535833	0.552053	0.551262	0.868546	0.764491	0.443907	0.340227	0.634759	-0.388133	-0.0796212	0.0891129	0.141385	-0.324304	-0.101135	0.53758	0.0596366	0.465525	0.693052	-0.279011	-0.23077	0.122066	-0.192589	0.138373	-0.77414	-0.617181	0.0948251	-0.0891307	0.376094	0.16389	0.264466	-0.508647
VIT_00s0218g00160	-0.666811	-0.427067	0.0770684	-0.223868	-0.238258	0.102589	-0.103751	-0.0242444	0.0344766	0.285645	0.0636298	-0.291594	-0.0408146	-0.521513	-0.195503	-0.0912644	-0.31241	-0.182557	0.324083	0.334366	0.260953	0.716759	0.643236	0.465295	0.412269	0.762411	-0.296315	-0.0261196	0.00840583	0.197359	-0.027427	0.11359	0.579584	0.0950418	0.483841	0.623853	-0.178783	-0.125478	0.207843	-0.0477841	0.22157	-0.686554	-0.730647	-0.106411	-0.113698	0.242069	0.207734	0.274009	-0.504463
VIT_00s0218g00170	-0.756356	-0.457355	0.0778954	-0.367962	-0.115086	0.312243	-0.0419212	0.0182937	0.0348764	0.286755	0.292498	-0.0570462	-0.107165	-0.41778	-0.284651	-0.00943518	-0.286958	-0.108101	0.567502	0.521928	0.463842	0.795914	0.875995	0.424527	0.541054	0.658053	-0.218992	-0.0723458	0.0474651	0.290518	-0.23474	0.127782	0.419698	-0.0375047	0.517159	0.819388	-0.152302	-0.245025	0.195882	-0.153657	0.168972	-0.600805	-0.432989	0.211097	0.206876	0.593772	0.0656394	0.253454	-0.469326
VIT_00s0218g00190	-0.7545	-0.463225	0.151495	-0.288085	-0.143945	0.324951	0.0303793	0.053436	0.058476	0.314686	0.328212	-0.0208684	-0.0779026	-0.40599	-0.26758	0.0212063	-0.271637	-0.0875271	0.589719	0.567355	0.516027	0.814192	0.898744	0.453795	0.532596	0.627183	-0.245554	-0.0317598	0.0710855	0.279454	-0.27945	0.0913551	0.461574	0.0190086	0.495546	0.818916	-0.158669	-0.264859	0.195458	-0.187203	0.165266	-0.625649	-0.405967	0.309514	0.217449	0.639267	0.054674	0.229945	-0.50829
VIT_00s0218g00200	-0.705336	-0.427024	0.138886	-0.310928	-0.0798208	0.313164	-0.0199083	0.0302313	0.103207	0.328627	0.303346	-0.0390788	-0.0415917	-0.367021	-0.23162	0.0388847	-0.227489	-0.0693885	0.511355	0.487939	0.425232	0.764543	0.842288	0.427022	0.56041	0.707497	-0.260782	-0.0663911	0.028543	0.21951	-0.189884	0.157393	0.413568	-0.0478818	0.445969	0.759893	-0.198182	-0.269789	0.160367	-0.194997	0.12085	-0.603066	-0.488451	0.165572	0.158	0.540277	0.07963	0.271607	-0.424328
VIT_00s0218g00220	-0.568689	-0.237286	-0.20877	-0.401301	-0.245046	-0.0691147	-0.272052	-0.413721	-0.354106	-0.360235	0.0161751	0.0250484	-0.341432	-0.26299	-0.593646	-0.299247	-0.299595	-0.291157	0.304722	0.13482	0.0392817	0.0761782	0.432419	-0.0335653	0.318636	-0.0945161	-0.0459652	-0.0522089	-0.227449	0.315533	0.0693678	0.355834	0.192243	0.246906	0.39198	0.6521	0.496223	0.237353	0.335567	0.185303	0.364812	0.247691	0.473327	0.498325	0.75445	0.706523	0.0142571	0.10491	-0.213682
VIT_00s0220g00010	0.114003	-0.212909	-0.404384	-0.358711	0.357691	-0.0948941	-0.250738	-0.246562	-0.057119	-0.457893	-0.222897	-0.144778	-0.0783405	0.145897	-0.268922	-0.179579	-0.145852	-0.230211	-0.093218	-0.591947	-0.384507	-0.32996	-0.154709	-0.128318	0.0968433	-0.0557375	0.236638	-0.258098	-0.52274	-0.363411	0.350004	0.410414	-0.329907	-0.184024	-0.000302749	-0.0515587	0.222248	0.0550043	0.229092	0.375482	0.0634102	0.563102	0.347249	-0.2383	0.307441	-0.00447591	-0.118982	-0.172767	0.743958
VIT_00s0220g00020	-0.262453	-0.393538	-0.191675	-0.12031	-0.252337	-0.206533	-0.0829839	-0.168391	-0.265676	-0.240893	-0.158027	-0.247933	-0.215922	-0.250106	-0.356236	-0.268831	-0.393143	-0.366958	-0.026516	-0.132302	-0.106788	0.00143601	0.0767008	0.186774	0.0405015	-0.0293114	0.22319	0.213693	0.0199717	0.298297	0.155282	0.15867	0.27703	0.255123	0.308911	0.219291	0.265253	0.0503997	0.369105	0.285966	0.330632	0.0642059	0.0829163	0.135907	0.192809	0.152357	-0.159133	-0.15484	-0.149023
VIT_00s0220g00030	-0.282354	-0.1615	-0.449234	-0.42507	-0.293915	-0.27506	-0.20225	-0.181037	-0.359937	-0.155368	-0.238595	-0.354795	-0.276072	-0.361072	-0.282135	-0.333743	-0.375556	-0.344658	-0.202723	-0.0264286	-0.235918	-0.0176331	-0.055971	0.22347	-0.040052	0.118371	0.396089	0.182952	0.27705	0.632133	0.229843	0.120169	0.125273	-0.072914	0.435093	0.14097	0.217999	0.230158	0.289748	0.32401	0.338697	-0.0482324	-0.209197	-0.282274	-0.0533677	-0.156184	0.101888	0.0865015	-0.342848
VIT_00s0220g00060	0.0796372	0.0101214	-0.410759	-0.398319	0.451029	0.250068	-0.0935996	0.0163422	-0.0814085	-0.171945	-0.137926	-0.121822	-0.0686289	0.0465325	-0.0256523	-0.00681934	-0.0617158	-0.01112	0.259143	-0.236369	-0.120659	-0.0865439	-0.0843707	-0.0193939	-0.00458661	0.0579388	0.040322	-0.41168	-0.16678	-0.210914	0.0880382	0.107712	-0.402018	-0.440808	0.0889675	-0.0305765	0.0132637	0.082957	0.00509632	0.221871	-0.0216986	0.188744	0.0350533	-0.305064	-0.00514414	-0.131623	0.10674	0.082006	0.392142
VIT_00s0220g00070	0.466798	0.754653	-0.0451524	0.138794	0.138426	0.0607816	-0.0042652	0.198695	-0.0868716	0.191511	0.00979929	0.158233	0.323711	0.196223	0.539862	0.182399	0.418351	0.462037	-0.241636	-0.167165	0.13538	-0.143054	-0.390085	-0.456626	-0.431821	-0.237071	-0.0250453	-0.0956392	0.337538	-0.10076	-0.279475	-0.514661	-0.517074	-0.32108	-0.278668	-0.463908	-0.263308	0.23355	-0.636095	-0.164086	-0.275696	-0.0900847	-0.104181	-0.25757	-0.512211	-0.480293	0.510915	0.191555	0.0289763
VIT_00s0220g00080	0.553989	0.316864	0.435281	0.247954	0.81195	0.746929	0.474127	0.642026	0.736523	0.569875	0.403051	0.463141	0.526722	0.579078	0.729003	0.721217	0.653586	0.682126	0.277857	0.133363	0.376014	0.158282	-0.0617518	-0.0621379	-0.0659886	0.0198922	-0.449237	-0.539208	-0.113556	-0.680402	-0.443885	-0.380922	-0.41875	-0.573724	-0.604755	-0.456219	-0.688549	-0.525271	-0.583571	-0.587151	-0.776694	-0.189349	-0.147625	-0.134744	-0.409368	-0.226713	-0.224612	0.0280501	0.496594
VIT_00s0220g00090	-0.0286316	-0.204826	-0.212417	-0.175412	0.137178	-0.157134	-0.121076	-0.218584	0.0904027	-0.193678	-0.349181	-0.375017	-0.205035	-0.0799715	-0.132814	-0.118346	-0.1243	-0.244144	-0.13296	-0.50669	-0.547429	-0.163903	-0.146253	0.266651	0.213467	0.462971	-0.166287	-0.292601	-0.491648	-0.382693	0.573842	0.482534	0.0905309	-0.0546589	-0.00211069	-0.0807025	0.0405748	0.0568109	0.19486	0.26395	0.0448416	0.113249	-0.371373	-0.606629	-0.118064	-0.290746	0.0987678	0.00447975	0.353712
VIT_00s0220g00100	-0.0104143	-0.176785	-0.328736	-0.417332	0.444102	0.245399	-0.116136	0.052134	0.13904	-0.0793558	-0.146207	-0.207628	-0.0149582	-0.0280492	0.0141733	-0.00793963	-0.0632894	-0.0407122	0.303488	-0.288263	-0.0898314	0.138985	0.022236	0.092863	0.117669	0.290165	-0.160159	-0.644999	-0.484743	-0.445649	0.10424	0.126466	-0.182037	-0.408009	0.0630139	0.00892585	-0.150865	-0.0815986	0.0318333	0.152406	-0.127338	0.0014778	-0.224835	-0.506196	-0.12621	-0.166576	0.00490678	0.159529	0.425831
VIT_00s0220g00110	-0.440418	-0.321218	-0.609216	-0.269956	-0.700022	-0.737108	-0.601771	-0.689598	-0.789006	-0.761571	-0.737173	-0.716553	-0.685831	-0.710715	-0.749643	-0.862672	-0.772213	-0.808877	-0.193977	-0.234803	-0.499069	-0.277415	-0.200552	0.01897	-0.241018	-0.224146	0.279534	0.302144	-0.0578405	0.475439	0.500168	0.280363	0.450905	0.629419	0.674432	0.376836	0.804304	0.682883	0.705007	0.808639	0.880739	0.317072	0.204704	-0.139636	0.26753	-0.0293873	0.188181	-0.172281	-0.272586
VIT_00s0220g00120	-0.610315	-0.435996	-0.511887	-0.478373	-0.309117	-0.237133	-0.497678	-0.428397	-0.409264	-0.322854	-0.503669	-0.682094	-0.585717	-0.718489	-0.552462	-0.626848	-0.684204	-0.679246	0.173309	-0.0132604	-0.268363	0.192211	0.150857	0.243538	0.0631627	0.344035	-0.161112	-0.21302	-0.139417	0.278747	0.382139	0.282441	0.457959	0.154578	0.707656	0.508326	0.378187	0.364755	0.637274	0.574141	0.632863	-0.169824	-0.344316	-0.419009	0.0205994	-0.0226546	0.130398	0.0235895	-0.29188
VIT_00s0220g00130	-0.190093	0.156186	-0.310922	-0.332717	-0.233888	-0.025021	-0.0565245	0.0105716	-0.459972	-0.0189307	0.111775	0.0650327	-0.127665	-0.172369	-0.101364	-0.145425	-0.14804	-0.0136597	-0.0198465	0.224491	0.262871	0.0965463	0.102299	-0.0515079	-0.147615	-0.245538	0.39611	0.216137	0.552711	0.71041	-0.276527	-0.257854	-0.175387	-0.176929	0.334822	0.176424	0.128051	0.203704	-0.0287797	0.0745602	0.171399	-0.0777922	0.159028	0.255949	0.0924309	0.148056	0.133308	0.0523953	-0.45869
VIT_00s0220g00140	-0.240518	-0.131016	-0.584609	-0.258502	-0.409437	-0.594413	-0.652748	-0.65542	-0.605644	-0.678249	-0.679429	-0.600152	-0.551007	-0.479705	-0.54779	-0.73607	-0.539284	-0.64231	-0.203598	-0.334414	-0.601576	-0.374117	-0.320284	-0.185708	-0.201039	-0.122397	0.149894	0.0327625	-0.185627	0.180283	0.57769	0.33399	0.180656	0.359369	0.442288	0.163622	0.640851	0.625188	0.531557	0.712468	0.660273	0.370555	0.126104	-0.384111	0.150787	-0.200297	0.263366	-0.0203443	-0.00625127
VIT_00s0220g00160	0.374728	0.191373	0.0792125	-0.108509	0.750199	0.650056	0.275876	0.586942	0.461186	0.481982	0.331746	0.258827	0.501153	0.371281	0.591296	0.515834	0.40373	0.518411	0.209878	-0.0381309	0.402516	0.295602	0.0384428	-0.0428552	-0.0449399	0.1547	-0.137593	-0.504678	0.0389178	-0.422729	-0.468321	-0.397934	-0.537951	-0.775652	-0.295138	-0.32027	-0.677606	-0.451938	-0.500233	-0.379918	-0.599079	-0.293129	-0.278101	-0.293635	-0.448503	-0.249002	-0.0111983	0.110746	0.410455
VIT_00s0220g00170	0.196512	0.155183	0.375582	0.221625	0.453358	0.637176	0.293771	0.430527	0.417824	0.431778	0.375527	0.348713	0.30264	0.268232	0.423449	0.45036	0.362685	0.456119	0.544643	0.29085	0.539627	0.346777	0.219266	-0.114751	-0.00932021	0.000498391	-0.391133	-0.341032	0.000546907	-0.428351	-0.524342	-0.389198	-0.172795	-0.259843	-0.254587	-0.0383981	-0.440288	-0.347518	-0.367366	-0.419799	-0.405308	-0.303788	-0.045787	0.191674	-0.173983	0.110777	-0.0726967	-0.0292266	0.133024
VIT_00s0220g00180	-0.449024	-0.245892	-0.790877	-0.620055	-0.169505	-0.114461	-0.521671	-0.318335	-0.683606	-0.459081	-0.541133	-0.654559	-0.614201	-0.704875	-0.47696	-0.647295	-0.701102	-0.554579	0.357706	-0.0957019	-0.0463067	0.157894	0.0347328	0.0334702	-0.261244	-0.0393476	0.0892573	-0.27066	0.0453011	0.341336	0.0580572	-0.0600095	0.0750971	-0.0253142	0.800105	0.459575	0.401802	0.481148	0.459618	0.68	0.634766	-0.0542916	-0.0490988	-0.344016	0.000754809	-0.0653405	0.260907	-0.0234868	-0.187845
VIT_00s0222g00030	-0.19087	-0.16813	-0.256292	-0.332668	0.271093	0.26818	-0.18711	0.0844658	0.0125364	0.0703891	-0.173214	-0.347902	-0.0898864	-0.31899	0.0207027	-0.0742526	-0.198987	-0.0593476	0.39478	-0.0363009	0.173725	0.437147	0.216354	0.143514	0.00801635	0.413554	-0.280479	-0.471764	-0.208611	-0.271004	-0.127484	-0.114509	-0.0114054	-0.273868	0.297224	0.24424	-0.231441	-0.0377937	0.0156958	0.130657	0.034054	-0.360615	-0.478618	-0.499703	-0.300212	-0.154772	0.149857	0.0552376	0.138258
VIT_00s0222g00100	-0.112212	-0.227316	-0.0420507	-0.215492	0.33179	0.447488	0.0606731	0.343099	0.214488	0.302392	0.119607	-0.117264	0.129775	-0.148683	0.178697	0.14396	-0.0660618	0.123551	0.51587	0.161624	0.471426	0.630115	0.367125	0.233131	0.0437924	0.378729	-0.134659	-0.355599	-0.068114	-0.249277	-0.405112	-0.287492	-0.0225722	-0.341731	0.186097	0.215399	-0.435934	-0.305082	-0.0982966	-0.0911264	-0.15378	-0.49505	-0.443648	-0.248884	-0.308959	-0.0230034	-0.0362259	0.0750629	0.0955327
VIT_00s0225g00010	0.61126	0.448165	0.721018	0.462956	0.609952	0.61338	0.704348	0.681288	0.775729	0.678156	0.762175	0.860159	0.827699	0.863084	0.775552	0.925993	0.893946	0.905497	1.66536e-05	0.156451	0.474585	0.0610371	0.0564983	-0.116592	0.129373	-0.0745508	-0.144485	-0.0677775	0.10486	-0.46981	-0.52548	-0.320398	-0.4842	-0.444642	-0.832726	-0.498041	-0.697466	-0.623337	-0.786142	-0.858407	-0.901458	-0.0937286	0.0928779	0.388217	-0.152079	0.0741094	-0.203097	0.170711	0.339356
VIT_00s0225g00020	0.0372185	0.115862	0.583121	0.648256	-0.608424	-0.398491	0.187461	-0.110965	0.0262223	0.119613	0.207537	0.282082	0.120059	0.124517	0.0111798	0.0767956	0.187938	0.0840296	-0.410221	0.288712	-0.0429411	-0.185566	-0.0260935	-0.0536689	0.0711808	-0.157918	0.165943	0.812386	0.299897	0.316761	0.07383	0.0364274	0.391505	0.644125	-0.265064	-0.0912813	0.126268	-0.00108395	-0.0701972	-0.275126	0.0333542	0.0166088	0.133508	0.560666	0.150352	0.182442	-0.0221677	-0.104738	-0.464693
VIT_00s0225g00050	0.263911	0.50907	0.450275	0.210174	0.364202	0.361216	0.147763	0.077887	0.414987	0.348663	0.38551	0.513869	0.44861	0.492597	0.421803	0.536842	0.696429	0.61985	0.12785	0.0732708	0.0259576	-0.0401844	0.0850485	-0.257209	0.37618	0.258852	-0.426297	-0.268866	-0.266802	-0.498184	-0.00296057	0.125744	-0.275655	-0.21342	-0.577582	-0.184355	-0.338059	-0.134599	-0.649726	-0.540986	-0.56409	0.00184012	-0.124687	0.0353572	-0.02319	0.0756235	0.300602	0.293518	0.220084
VIT_00s0225g00060	-0.443809	-0.426738	-0.53728	-0.425836	-0.151838	-0.352595	-0.453431	-0.59509	-0.404321	-0.628334	-0.605543	-0.626574	-0.593217	-0.503134	-0.657817	-0.585389	-0.584257	-0.644199	0.103392	-0.363213	-0.553836	-0.158905	0.0237349	0.231878	0.162381	0.266382	-0.122682	-0.23062	-0.547893	-0.114793	0.655388	0.621869	0.283439	0.266193	0.499235	0.415103	0.549738	0.435197	0.641401	0.684527	0.591103	0.304741	-0.0293692	-0.366537	0.309109	0.0510869	0.190736	-0.003988	0.185102
VIT_00s0225g00080	0.368812	0.431829	-0.046278	0.129485	0.135614	0.0825244	0.00258332	0.222823	0.00286944	0.11327	-0.12254	-0.0125458	0.269583	0.039706	0.438423	0.103604	0.251651	0.313293	-0.0898175	-0.05285	0.196887	-0.0100025	-0.345831	-0.25692	-0.503007	-0.300883	-0.199592	-0.236759	0.0764503	-0.249289	-0.29312	-0.538915	-0.222671	-0.129945	-0.168633	-0.353566	-0.221153	0.166053	-0.39486	-0.0611914	-0.203571	-0.0955186	-0.0826035	-0.259757	-0.491275	-0.455103	0.207257	0.144781	0.091162
VIT_00s0225g00090	0.178006	-0.19482	0.0821603	0.112496	0.217927	0.324239	0.355211	0.611026	0.222676	0.339922	0.177804	0.0389888	0.136271	0.0234341	0.313562	0.190542	-0.0682239	0.10801	0.0932575	0.166462	0.572939	0.369468	0.0322872	0.221737	-0.400701	-0.212245	0.167976	0.0519384	0.451907	0.0898296	-0.617857	-0.637661	-0.0824628	-0.274175	0.0651752	-0.149789	-0.395131	-0.430517	0.0121104	-0.14012	-0.166246	-0.376213	-0.0647601	0.0890362	-0.377628	-0.156676	-0.467507	-0.385225	-0.0157232
VIT_00s0225g00100	-0.227396	-0.11976	-0.226513	-0.471887	0.267327	0.266173	-0.108444	0.0406112	0.0401785	0.0238299	0.0527162	-0.0596313	-0.00740689	-0.0923293	-0.0757671	0.00664367	-0.0884809	-0.0164199	0.289195	-0.0365671	0.12982	0.271224	0.288115	0.108812	0.242917	0.271293	-0.134671	-0.445493	-0.223071	-0.109014	-0.087422	0.083285	-0.100848	-0.353927	0.186394	0.263172	-0.121892	-0.104636	-0.0132509	-0.00535994	-0.0674873	-0.121046	-0.150971	-0.170614	0.0466614	0.136905	0.0384485	0.196837	0.148391
VIT_00s0225g00110	-0.0596676	0.176446	0.504585	0.296218	-0.23535	0.0442967	0.096243	0.0300595	0.127119	0.238525	0.461778	0.528527	0.25315	0.216216	0.0821242	0.213713	0.318812	0.276403	0.0150375	0.45115	0.296118	0.0908709	0.253495	-0.256748	0.22666	-0.187291	-0.0827832	0.256688	0.104997	0.21598	-0.231281	-0.0725301	0.164051	0.250757	-0.249815	0.0903369	-0.0206902	-0.127391	-0.224065	-0.453672	-0.195155	-0.039021	0.27685	0.65915	0.302743	0.450673	-0.0562172	0.034642	-0.385963
VIT_00s0225g00120	0.539713	0.311116	0.687882	0.572575	0.285909	0.364337	0.688964	0.737009	0.684569	0.755198	0.644868	0.623751	0.628656	0.617615	0.765372	0.707882	0.637333	0.661294	-0.231456	0.223307	0.509623	0.185324	-0.0215213	0.00328229	-0.0993979	-0.0542235	0.0351317	0.187967	0.44998	-0.155286	-0.59823	-0.54202	-0.258116	-0.334465	-0.642691	-0.535005	-0.735569	-0.66563	-0.605245	-0.765507	-0.713893	-0.387787	-0.154785	0.232909	-0.437669	-0.145386	-0.334931	-0.0198604	0.035406
VIT_00s0225g00130	0.184869	0.0274154	0.590866	0.176983	0.554432	0.720526	0.580748	0.751818	0.842197	0.787389	0.739265	0.606458	0.62374	0.489947	0.591294	0.770226	0.545671	0.636612	0.257702	0.34876	0.67635	0.566795	0.426508	0.171237	0.254627	0.258875	-0.270962	-0.274451	0.106239	-0.286172	-0.661529	-0.355313	-0.164891	-0.517248	-0.433136	-0.101748	-0.784827	-0.788534	-0.480152	-0.795851	-0.731661	-0.511016	-0.243398	0.235753	-0.20827	0.197863	-0.360527	0.147632	0.107403
VIT_00s0225g00140	0.138982	0.0117714	-0.0401865	0.148507	-0.0139269	-0.208032	-0.169302	-0.180652	-0.00887942	-0.147815	-0.209093	-0.138094	0.0337243	0.028092	-0.0631916	-0.127965	-0.0539079	-0.147014	-0.250793	-0.130746	-0.291045	-0.281769	-0.26101	-0.162062	-0.120263	-0.0715327	0.110297	0.16943	-0.00727242	-0.0579719	0.263764	0.138921	0.00159723	0.121203	-0.0270672	-0.125734	0.158798	0.146783	0.142922	0.1756	0.164507	0.191914	0.0531705	-0.176194	-0.0417908	-0.214933	0.0721584	-0.0695327	0.185299
VIT_00s0225g00150	-0.365352	-0.331552	-0.294009	-0.609347	0.340132	0.198677	-0.341164	-0.140264	0.14422	-0.0559362	-0.0205951	-0.191488	-0.0597006	-0.148176	-0.216284	-0.0740791	-0.154469	-0.152991	0.316213	-0.264113	-0.0665518	0.366939	0.417171	0.111142	0.523204	0.604764	-0.243563	-0.648438	-0.598368	-0.314204	0.185972	0.391756	0.00659447	-0.340158	0.220191	0.379222	-0.103901	-0.104363	0.135491	0.103373	-0.0320442	-0.112515	-0.32084	-0.397894	0.127062	0.188517	0.120785	0.169621	0.30801
VIT_00s0225g00160	-0.375671	-0.296508	-0.272127	-0.206938	-0.266832	-0.0489675	-0.162794	-0.0245734	-0.394082	-0.164645	-0.193218	-0.314913	-0.333565	-0.523574	-0.300185	-0.381524	-0.515096	-0.326889	0.235368	0.282004	0.361751	0.324392	0.197259	0.133808	-0.325189	-0.213076	0.109732	0.116217	0.277385	0.376532	-0.328044	-0.311928	0.215511	0.148257	0.595085	0.43631	0.184591	0.117466	0.371938	0.280251	0.444803	-0.187879	0.110214	0.137523	0.0564736	0.153243	7.04659e-05	-0.151896	-0.308649
VIT_00s0225g00220	0.181474	0.0934852	0.173871	0.0794157	0.261653	0.505699	0.527767	0.728761	0.310514	0.658357	0.366122	0.158922	0.332404	0.103253	0.568116	0.451086	0.195106	0.407595	0.173215	0.282082	0.601745	0.502333	0.123244	0.312942	-0.201283	0.155694	0.0738242	-0.0188551	0.616293	0.150333	-0.645648	-0.657099	-0.180494	-0.51755	-0.0447144	-0.203795	-0.663338	-0.451971	-0.375572	-0.396127	-0.383619	-0.679205	-0.492651	-0.0637301	-0.62396	-0.244253	-0.126933	0.0209097	-0.243782
VIT_00s0226g00020	0.0383841	-0.17399	-0.604387	-0.492536	0.335379	-0.0880004	-0.332069	-0.271355	-0.24294	-0.545892	-0.373404	-0.273013	-0.288878	-0.0256132	-0.314842	-0.308672	-0.263351	-0.313445	-0.00209243	-0.521633	-0.381861	-0.325369	-0.213887	-0.132177	-0.0621609	-0.141935	0.158943	-0.386076	-0.445627	-0.240006	0.329517	0.322904	-0.364792	-0.24476	0.165634	-0.0109616	0.319741	0.220934	0.302797	0.516295	0.180969	0.546054	0.349324	-0.342857	0.26522	-0.0823406	-0.0490288	-0.117342	0.611819
VIT_00s0226g00030	-0.568316	-0.577099	-0.506115	-0.342304	-0.584819	-0.53695	-0.443407	-0.488032	-0.621116	-0.557831	-0.434466	-0.56042	-0.639628	-0.636494	-0.770295	-0.756217	-0.834755	-0.813129	-0.0575978	-0.0135358	-0.242214	-0.0271143	0.106935	0.187279	-0.0463203	-0.0717419	0.42871	0.356588	0.0874286	0.604203	0.307989	0.281192	0.426579	0.435301	0.745715	0.525019	0.623225	0.329055	0.818319	0.657372	0.806032	0.135994	0.188849	0.055609	0.377364	0.213563	-0.112335	-0.143111	-0.317252
VIT_00s0226g00040	0.465385	0.214235	0.541908	0.370769	0.27206	0.205463	0.565571	0.5158	0.598216	0.55319	0.532702	0.535887	0.638022	0.627096	0.56773	0.630795	0.58284	0.539797	-0.37953	0.145697	0.153679	-0.0324691	-0.0903554	0.0792091	0.120215	0.0617659	0.15673	0.228083	0.243397	-0.0838646	-0.208111	-0.152415	-0.23429	-0.323909	-0.623889	-0.52809	-0.567655	-0.569266	-0.488252	-0.635843	-0.66213	-0.12237	-0.12814	0.100214	-0.251012	-0.144374	-0.264045	0.104391	0.10477
VIT_00s0226g00060	-0.136513	-0.334794	-0.380463	-0.512957	0.412953	0.127102	-0.272568	-0.219131	-0.0779125	-0.398008	-0.0376954	-0.0441613	-0.179211	0.0684297	-0.354315	-0.14937	-0.185656	-0.1985	0.354422	-0.346132	-0.121427	-0.0132149	0.222229	-0.090269	0.349121	0.0836024	0.0905182	-0.467379	-0.667052	-0.369109	0.192803	0.427014	-0.281056	-0.228367	0.120001	0.247252	0.181178	-0.036215	0.22187	0.295237	0.0331543	0.405222	0.342544	-0.0360362	0.500946	0.344981	-0.0990913	-0.0815231	0.591884
VIT_00s0226g00070	-0.78617	-0.298886	-0.237318	-0.321208	-0.643132	-0.381345	-0.599406	-0.670187	-0.547415	-0.327098	-0.310915	-0.44531	-0.468209	-0.7114	-0.665501	-0.626369	-0.553513	-0.569477	0.174171	0.168255	-0.210691	0.185784	0.365123	0.039765	0.319632	0.339535	-0.179177	0.108919	-0.137441	0.426339	0.408631	0.419821	0.620454	0.496305	0.656465	0.730459	0.518466	0.477562	0.494056	0.395038	0.68556	-0.122471	-0.205448	0.00813364	0.328277	0.340027	0.419428	0.147872	-0.586219
VIT_00s0226g00080	-0.206683	-0.00567405	-0.470253	-0.267069	-0.0825326	-0.0791557	-0.465966	-0.277749	-0.468484	-0.303308	-0.562613	-0.570415	-0.458413	-0.562347	-0.221803	-0.490272	-0.432206	-0.369384	0.176398	-0.0689523	-0.120282	0.0134984	-0.17685	-0.0806963	-0.402799	-0.0839091	-0.236478	-0.280109	0.0318925	0.0517661	0.101951	-0.140336	0.111389	0.0412431	0.500455	0.195762	0.271718	0.476735	0.300577	0.492701	0.468541	-0.0460931	-0.129902	-0.4469	-0.218733	-0.29487	0.402021	0.0298546	-0.0656861
VIT_00s0226g00090	0.25731	0.276485	0.311539	0.397784	-0.0748044	0.1531	0.223174	0.483063	0.25204	0.553695	0.124451	0.0256772	0.242343	-0.0322518	0.57231	0.244783	0.225697	0.344799	-0.059451	0.353227	0.453313	0.362216	-0.116956	-0.00208048	-0.432607	0.00494151	-0.110123	0.118637	0.524788	0.0552431	-0.529411	-0.733551	0.0824435	-0.0657451	-0.128946	-0.272015	-0.534889	-0.208618	-0.39943	-0.367238	-0.259841	-0.639178	-0.519367	-0.225283	-0.75467	-0.470893	0.0298091	0.093509	-0.32493
VIT_00s0226g00100	0.62894	0.365307	0.463576	0.32529	0.631946	0.627457	0.605451	0.815098	0.618763	0.656055	0.606967	0.622638	0.638722	0.653369	0.807979	0.745637	0.654531	0.763801	0.0547545	0.137403	0.618581	0.19816	-0.0422239	-0.104769	-0.190052	-0.171226	0.00895579	-0.126407	0.327703	-0.348227	-0.727398	-0.637452	-0.573307	-0.614644	-0.59931	-0.532144	-0.783342	-0.646794	-0.693179	-0.692752	-0.802556	-0.261665	-0.0211835	0.134057	-0.422206	-0.172503	-0.284651	0.02642	0.303565
VIT_00s0226g00110	-0.0182108	0.0317082	0.154279	-0.152108	0.336713	0.178103	-0.111164	-0.159135	0.213935	-0.0149574	0.348328	0.394661	0.171386	0.392615	-0.0584465	0.209459	0.296815	0.194912	0.134297	-0.177529	-0.0471375	-0.0342719	0.310348	-0.294415	0.589931	0.21588	-0.0993076	-0.257694	-0.525202	-0.369714	0.12774	0.443417	-0.2469	-0.173962	-0.302045	0.111169	-0.0515248	-0.188239	-0.197288	-0.230812	-0.30345	0.273546	0.240053	0.206786	0.477511	0.451026	0.0687993	0.0435261	0.396771
VIT_00s0226g00140	0.0403532	-0.0170914	-0.136545	-0.245408	0.317724	0.0162703	-0.302756	-0.252074	0.101239	-0.244461	-0.054106	0.031066	0.0914277	0.177321	-0.126732	-0.0358895	0.103492	-0.0176231	0.0382933	-0.347103	-0.277383	-0.163155	0.0236306	-0.257382	0.305204	0.13763	-0.130703	-0.394265	-0.633179	-0.492231	0.284751	0.402583	-0.237776	-0.142222	-0.153868	0.0146643	0.0785442	0.0345541	-0.0230435	0.094861	-0.112652	0.366223	0.16273	-0.193748	0.278224	0.107169	0.0671206	0.0452481	0.554065
VIT_00s0226g00160	-0.0880219	-0.170146	-0.80151	-0.585022	0.198982	-0.166509	-0.550109	-0.414278	-0.429662	-0.623385	-0.62993	-0.587883	-0.434169	-0.316056	-0.388836	-0.517254	-0.451353	-0.470815	0.137552	-0.541994	-0.474502	-0.248375	-0.262692	-0.103388	-0.144171	0.00306342	0.0901401	-0.483351	-0.46341	-0.215263	0.43872	0.301086	-0.213025	-0.16064	0.394093	0.101652	0.389613	0.437655	0.367627	0.71013	0.386112	0.394354	0.0785154	-0.635705	0.0538873	-0.273872	0.177765	0.0356882	0.473602
VIT_00s0227g00020	0.066742	-0.0616562	0.512019	0.362696	0.145823	0.277226	0.364136	0.156296	0.342561	0.205417	0.306358	0.318361	0.210182	0.263437	0.129434	0.338236	0.257228	0.259507	0.286528	0.251322	0.184744	0.0834602	0.228614	0.149275	0.256986	0.106139	-0.261392	0.055215	-0.168688	-0.388218	-0.10047	0.074508	0.0808344	0.140608	-0.285633	0.0318456	-0.179674	-0.322087	-0.130727	-0.332525	-0.245501	-0.0201548	0.0644052	0.380807	0.156801	0.296578	-0.162111	-0.186129	0.148748
VIT_00s0227g00060	0.251577	-0.0974974	0.12913	-0.0738104	0.579463	0.496887	0.366196	0.405856	0.359651	0.183745	0.386437	0.35599	0.321329	0.435568	0.252486	0.457535	0.278898	0.373041	0.310768	-0.0834601	0.309228	0.151211	0.185693	0.110934	0.189224	0.0103888	0.135665	-0.218094	-0.186249	-0.376352	-0.330124	-0.0806061	-0.403924	-0.42085	-0.287534	-0.124869	-0.386744	-0.518369	-0.293057	-0.305402	-0.503493	0.0612821	0.158598	0.183461	0.0851413	0.18468	-0.303941	-0.0555516	0.476384
VIT_00s0227g00070	-0.595138	-0.394294	-0.348273	-0.314671	-0.508309	-0.26261	-0.325687	-0.400707	-0.57548	-0.44245	-0.223907	-0.285375	-0.540996	-0.549507	-0.641101	-0.550125	-0.593264	-0.526285	0.27715	0.172571	0.0505377	0.136805	0.28765	0.069772	0.0230066	-0.191447	0.129467	0.145197	-0.00411455	0.501894	0.0454263	0.121561	0.381285	0.429978	0.626398	0.607044	0.57923	0.347442	0.553348	0.450517	0.620976	0.0894096	0.32892	0.394844	0.4992	0.47846	-0.0410381	-0.196351	-0.431612
VIT_00s0227g00090	-0.505025	-0.400768	-0.445253	-0.627595	0.170604	0.101065	-0.390496	-0.2431	-0.148733	-0.17467	-0.217105	-0.436134	-0.241969	-0.419772	-0.361549	-0.283013	-0.405825	-0.336026	0.41513	-0.152675	-0.0808723	0.373263	0.407669	0.23465	0.390479	0.632197	-0.19876	-0.500899	-0.459943	-0.181695	0.223941	0.363752	0.065466	-0.226223	0.476355	0.509207	0.0301911	0.0746528	0.271209	0.334261	0.245674	-0.177627	-0.401612	-0.454248	0.0822311	0.136758	0.22541	0.14559	0.142333
VIT_00s0227g00110	-0.364776	-0.104983	-0.614908	-0.2902	-0.609163	-0.717686	-0.686709	-0.850638	-0.843914	-0.85025	-0.73654	-0.591435	-0.742344	-0.575925	-0.758772	-0.847761	-0.627728	-0.739427	-0.195092	-0.271523	-0.678647	-0.521711	-0.303674	-0.184702	-0.170593	-0.288047	0.164653	0.184569	-0.174006	0.390112	0.66648	0.449555	0.280694	0.572206	0.537089	0.30357	0.920405	0.82332	0.621989	0.804851	0.825645	0.546521	0.361767	-0.127859	0.412755	-0.00694075	0.308284	-0.0667653	-0.178276
VIT_00s0227g00130	0.120383	0.131162	-0.593422	-0.261812	-0.138096	-0.418207	-0.496932	-0.492367	-0.572424	-0.666689	-0.531898	-0.325618	-0.35832	-0.144661	-0.335787	-0.507097	-0.269396	-0.347262	-0.185556	-0.425079	-0.527056	-0.583869	-0.507505	-0.42578	-0.322621	-0.430071	0.328768	0.0139304	-0.150507	0.100723	0.381922	0.168216	-0.260743	0.124186	0.170866	-0.115316	0.552135	0.546226	0.184179	0.589163	0.364026	0.614006	0.427886	-0.273089	0.181559	-0.255556	0.0791359	-0.224172	0.238465
VIT_00s0227g00140	-0.134105	0.0890884	-0.732979	-0.337175	-0.327201	-0.48949	-0.6199	-0.601532	-0.759254	-0.733119	-0.774602	-0.614252	-0.611024	-0.521618	-0.47656	-0.718302	-0.496476	-0.530772	-0.0579467	-0.31851	-0.532209	-0.447755	-0.444893	-0.218831	-0.422924	-0.317294	0.105964	-0.0807981	-0.12033	0.180913	0.451598	0.152325	0.00285757	0.2711	0.473851	0.121694	0.684163	0.80391	0.385772	0.769204	0.650848	0.435244	0.215457	-0.421366	0.0759333	-0.305328	0.347939	0.0332445	0.00253098
VIT_00s0227g00160	0.081548	-0.201781	0.46264	0.183937	0.110567	0.261469	0.380286	0.516322	0.478191	0.527314	0.595746	0.423589	0.440104	0.304924	0.285057	0.410058	0.210731	0.283347	-0.0420318	0.366162	0.526222	0.399688	0.309459	0.124848	0.140381	0.0173161	0.273597	0.26813	0.302538	0.19608	-0.503175	-0.302003	0.0478326	-0.181321	-0.207008	-0.0688107	-0.48205	-0.66694	-0.163777	-0.532822	-0.398179	-0.339112	-0.0351036	0.368865	-0.0545623	0.212945	-0.424781	-0.0564353	-0.128697
VIT_00s0227g00170	0.365538	0.0578126	-0.0428572	0.0964127	0.228952	-0.230777	-0.210846	-0.140679	0.246203	-0.143446	-0.293892	-0.184324	0.17959	0.197951	0.11653	-0.0213085	0.13732	-0.030955	-0.424333	-0.490123	-0.503734	-0.371713	-0.440838	-0.181484	-0.0597392	0.104653	-0.0244492	-0.146065	-0.438479	-0.531576	0.443248	0.248771	-0.117075	-0.0376222	-0.30042	-0.407875	-0.0506057	0.0392718	-0.0300314	0.123807	-0.12517	0.287902	-0.142014	-0.616593	-0.236618	-0.508681	0.0817166	0.0773096	0.600904
VIT_00s0227g00180	0.0987033	0.211657	-0.43453	-0.144217	-0.21688	-0.40648	-0.273424	-0.441274	-0.497237	-0.57622	-0.456534	-0.196166	-0.356146	-0.0681094	-0.302983	-0.386516	-0.17394	-0.29988	-0.285549	-0.194787	-0.572512	-0.690858	-0.541474	-0.245374	-0.29345	-0.513848	0.212041	0.0778343	-0.0304764	0.262337	0.458874	0.233772	-0.0988072	0.191383	0.0846526	-0.173337	0.611496	0.575373	0.231022	0.461336	0.335621	0.641971	0.494729	-0.087487	0.242551	-0.195993	0.109705	-0.123163	0.037095
VIT_00s0227g00190	-0.0816156	0.194732	-0.240894	0.134369	-0.630785	-0.539563	-0.312932	-0.475428	-0.667979	-0.531582	-0.539952	-0.316374	-0.471667	-0.405874	-0.329976	-0.528983	-0.298234	-0.351239	-0.208856	0.00885739	-0.315256	-0.453645	-0.438295	-0.232148	-0.504971	-0.625762	-0.00463709	0.290219	0.127731	0.38703	0.236323	-0.0696217	0.311523	0.646932	0.252029	0.020697	0.660936	0.693339	0.276101	0.437274	0.534114	0.361873	0.408852	0.13432	0.133951	-0.120946	0.275179	-0.144338	-0.390971
VIT_00s0227g00200	-0.519561	-0.369046	-0.676964	-0.379486	-0.610192	-0.721058	-0.689555	-0.799817	-0.752862	-0.801979	-0.826303	-0.814664	-0.752651	-0.747469	-0.813753	-0.89603	-0.791295	-0.881387	-0.152772	-0.317811	-0.682951	-0.30976	-0.180892	0.0703242	-0.0941566	-0.000507977	0.0864566	0.100163	-0.274968	0.336752	0.733309	0.507346	0.477054	0.577797	0.688328	0.409927	0.834174	0.743911	0.777856	0.895163	0.903759	0.339799	0.049939	-0.33592	0.278077	-0.0678305	0.2351	-0.149946	-0.195172
VIT_00s0229g00020	0.162921	0.129426	0.0965204	-0.0146044	0.202639	0.0400871	-0.0790272	-0.0383338	0.037742	-0.0576991	0.260019	0.369323	0.234061	0.350616	0.0585733	0.118194	0.257694	0.201625	-0.0490143	-0.188085	0.0516353	-0.118671	0.0538387	-0.371699	0.212947	-0.157937	0.0697727	-0.102052	-0.27838	-0.22264	-0.0149372	0.0980344	-0.307641	-0.120398	-0.293308	-0.121128	-0.0281502	-0.0864217	-0.20933	-0.143829	-0.267103	0.294233	0.366509	0.255285	0.292431	0.248403	0.0318262	-0.0939413	0.273539
VIT_00s0229g00030	0.195261	0.03648	-0.0882265	-0.21814	0.724567	0.578342	0.115092	0.20419	0.297438	0.0846416	0.0615507	0.105515	0.0173043	0.2773	0.185971	0.306273	0.197897	0.198664	0.461089	-0.0686141	-0.0300889	-0.0177644	-0.0152514	0.0114755	0.109146	0.123977	-0.301504	-0.635991	-0.322437	-0.449488	0.00909491	0.100916	-0.355839	-0.513316	-0.18168	-0.123848	-0.19223	-0.189909	-0.132716	-0.0616444	-0.327128	0.108956	-0.013029	-0.242403	-0.0365507	-0.0750642	-0.161688	-0.1064	0.485023
VIT_00s0229g00050	0.103269	-0.142543	-0.043021	0.421647	-0.440951	-0.477169	-0.0360811	-0.108576	-0.1951	-0.258439	-0.540624	-0.469582	-0.42312	-0.325941	-0.106044	-0.364538	-0.356744	-0.407892	-0.316102	-0.0856242	-0.259271	-0.255231	-0.481992	0.109516	-0.597379	-0.358295	0.0225055	0.335681	0.168508	0.102629	0.171558	-0.190519	0.447397	0.584534	0.142567	-0.197508	0.293984	0.249046	0.401128	0.368433	0.404352	0.0482019	0.0177729	-0.158042	-0.27965	-0.430533	-0.171437	-0.324729	-0.147141
VIT_00s0229g00060	0.615392	0.765032	0.15631	0.317537	0.209618	0.0263342	-0.0862299	-0.0185672	0.135571	0.0600967	-0.00671853	0.308937	0.225609	0.460042	0.465078	0.23788	0.595166	0.429345	-0.23299	-0.20216	-0.248881	-0.491362	-0.558331	-0.664501	-0.247631	-0.326193	-0.202581	-0.195412	-0.0728668	-0.343814	0.0679412	-0.15717	-0.441402	-0.113702	-0.608319	-0.607043	-0.074316	0.217537	-0.589469	-0.217322	-0.394729	0.284749	0.142354	-0.213053	-0.247719	-0.429771	0.189367	0.0679187	0.26388
VIT_00s0229g00080	-0.110682	-0.129877	0.142602	0.0311254	-0.163401	0.0257444	0.179009	0.131394	-0.0928578	0.167958	0.35253	0.214764	0.107048	0.0677867	-0.0354158	0.0690819	-0.0534775	0.0373656	0.0203446	0.229118	0.278711	0.143955	0.268152	0.128771	0.174429	0.0402354	0.475148	0.492025	0.392213	0.392107	-0.18407	-0.0564992	-0.0303391	-0.02726	0.0853379	0.113719	-0.0850794	-0.219008	-0.00382985	-0.135886	0.00835766	-0.144027	0.0413335	0.420518	0.133642	0.272747	-0.106024	-0.145911	-0.279851
VIT_00s0229g00090	-0.107313	0.264303	0.272704	0.0773741	0.00212997	0.382271	0.14032	0.370684	0.184434	0.629384	0.304261	0.116555	0.311007	-0.144328	0.42352	0.2716	0.21371	0.385089	0.24909	0.523321	0.602107	0.625617	0.31487	0.0488435	-0.0515277	0.310368	-0.321369	-0.0882639	0.43699	0.118348	-0.555841	-0.539345	0.0839035	-0.237948	0.0644585	0.138694	-0.522247	-0.154749	-0.426291	-0.440176	-0.211004	-0.771486	-0.602222	-0.0657116	-0.513611	-0.0789359	0.309173	0.439234	-0.463907
VIT_00s0229g00100	-0.474702	-0.316599	-0.749135	-0.471944	-0.528057	-0.62176	-0.628147	-0.699961	-0.800569	-0.790042	-0.772929	-0.766501	-0.699141	-0.727162	-0.751914	-0.844322	-0.759502	-0.777308	-0.0683182	-0.303997	-0.535913	-0.237101	-0.158279	0.066152	-0.158901	-0.0775928	0.156177	0.0351966	-0.228968	0.334079	0.542667	0.365343	0.310409	0.438085	0.702613	0.406332	0.755621	0.69482	0.649423	0.854505	0.819058	0.326846	0.1169	-0.311962	0.267004	-0.0478295	0.261579	0.019621	-0.158352
VIT_00s0229g00110	0.379832	0.359552	0.297805	0.166605	0.628237	0.617041	0.266584	0.375322	0.507156	0.368553	0.159628	0.26623	0.288112	0.330062	0.5376	0.510603	0.516686	0.53128	0.341485	0.139462	0.222876	0.0982603	-0.0853112	-0.0785276	-0.114646	0.0116939	-0.61157	-0.587943	-0.205815	-0.632197	-0.298293	-0.284113	-0.264294	-0.365844	-0.431253	-0.276456	-0.448138	-0.228023	-0.4834	-0.40888	-0.545904	-0.120663	-0.139531	-0.201298	-0.329585	-0.21299	-0.0102539	0.107229	0.387884
VIT_00s0229g00120	0.090697	0.14179	-0.42042	-0.335799	0.210582	-0.0102553	-0.308102	-0.234676	-0.289528	-0.399846	-0.315124	-0.165402	-0.076633	-0.0638269	-0.127702	-0.193045	-0.0486096	-0.043304	0.124104	-0.315479	-0.212518	-0.265019	-0.22762	-0.230782	-0.137114	-0.209657	-0.0332862	-0.33874	-0.333358	-0.238963	0.165868	0.0963598	-0.313253	-0.138518	0.0839377	-0.0145036	0.238104	0.332446	-0.0175313	0.312118	0.0863939	0.404732	0.245719	-0.264752	0.106989	-0.123883	0.251273	0.0108158	0.366125
VIT_00s0229g00130	-0.685108	-0.511041	-0.29333	-0.396826	-0.369999	-0.0581456	-0.203036	-0.10539	-0.373817	-0.0449562	-0.195535	-0.498092	-0.310455	-0.738249	-0.412459	-0.412709	-0.641598	-0.444774	0.300141	0.310392	0.241134	0.550303	0.439201	0.451395	0.0473444	0.321547	0.0170789	0.0800839	0.191062	0.492585	-0.085799	-0.0523863	0.499224	0.137125	0.780724	0.649774	0.12581	0.095972	0.475251	0.303607	0.524609	-0.467964	-0.383375	-0.0555914	-0.0245564	0.183463	0.125429	0.079019	-0.536397
VIT_00s0229g00140	-0.587866	-0.371175	-0.627145	-0.617218	-0.208356	-0.0667153	-0.451905	-0.253104	-0.566007	-0.315717	-0.371939	-0.584632	-0.399616	-0.725299	-0.462108	-0.555394	-0.662998	-0.478038	0.445338	0.0403218	0.127423	0.407602	0.305325	0.205195	-0.025424	0.196276	0.059699	-0.221299	-0.0577692	0.2683	-0.0114203	-0.0216986	0.205253	0.00779098	0.797301	0.607469	0.255442	0.333656	0.413866	0.535848	0.55959	-0.231617	-0.211658	-0.239826	0.0279884	0.106204	0.274993	0.0781854	-0.256449
VIT_00s0229g00160	0.460724	0.435534	-0.102444	-0.0845091	0.542221	0.274478	-0.057689	0.0257449	0.0491981	-0.0904288	0.129275	0.334025	0.159318	0.492793	0.242942	0.234973	0.416736	0.384109	0.154648	-0.237383	-0.0678971	-0.339858	-0.219191	-0.50804	0.00684515	-0.200734	0.0536342	-0.337391	-0.260426	-0.468275	-0.00137769	0.0399496	-0.721709	-0.404893	-0.394704	-0.314304	-0.0766681	0.0395954	-0.425136	-0.0651524	-0.360926	0.428874	0.339422	-0.068574	0.0979322	-0.0782153	0.0628743	0.135621	0.587739
VIT_00s0229g00170	0.468779	0.338165	0.09437	0.221471	0.144944	0.0389035	0.113733	0.360944	0.256255	0.416949	0.0677515	0.0261017	0.280955	0.217949	0.549158	0.238593	0.285971	0.291271	-0.380015	-0.121572	0.030011	-0.00699884	-0.3563	-0.155831	-0.315606	0.0943203	0.228588	0.134817	0.455431	0.0228399	-0.179107	-0.411573	-0.278712	-0.362507	-0.274138	-0.531377	-0.476074	-0.185822	-0.413253	-0.229338	-0.319628	-0.318403	-0.467983	-0.50278	-0.713365	-0.665155	0.0406584	0.0664541	0.0346449
VIT_00s0229g00180	-0.106438	-0.172512	-0.536617	-0.464165	-0.00505977	-0.313775	-0.444759	-0.478429	-0.344337	-0.641671	-0.277037	-0.133672	-0.404767	-0.0175134	-0.50894	-0.409249	-0.271317	-0.401351	-0.0609678	-0.436498	-0.474511	-0.400065	-0.125373	-0.2833	0.127727	-0.229506	0.279884	-0.212312	-0.500825	0.0389232	0.429175	0.496948	-0.183063	0.0446466	0.147676	0.124664	0.558968	0.301231	0.347485	0.483213	0.268789	0.65602	0.556334	-0.0381062	0.58051	0.193969	-0.14841	-0.0439226	0.336652
VIT_00s0229g00190	-0.154816	-0.574178	-0.249646	-0.223497	-0.0274858	-0.164164	-0.0290942	0.109746	-0.0274487	-0.240463	-0.12223	-0.224028	-0.0742468	-0.170575	-0.278305	-0.238472	-0.425219	-0.368004	-0.100978	-0.176459	0.117685	0.141772	0.0913359	0.276354	-0.102916	-0.162053	0.314396	0.0457326	-0.119242	0.0683981	-0.0912105	-0.0176777	0.12314	0.0376393	0.276195	0.13088	0.0897382	-0.200657	0.468922	0.262881	0.188307	0.0922573	0.22115	0.0585322	0.166305	0.110008	-0.460976	-0.28156	0.163057
VIT_00s0230g00030	-0.390016	-0.340199	-0.0577038	-0.181978	-0.126676	-0.198794	-0.243992	-0.480708	-0.149854	-0.368472	0.00412157	-0.0126978	-0.197149	-0.0398928	-0.539052	-0.218858	-0.211996	-0.320579	0.16113	-0.164713	-0.315243	-0.095633	0.355839	0.0224346	0.619653	0.278191	0.0292202	0.0190091	-0.533468	-0.0857625	0.477597	0.719883	0.177045	0.29274	0.120273	0.418475	0.390891	0.0946884	0.33242	0.216771	0.256674	0.323647	0.237409	0.276701	0.677219	0.574631	0.0309158	-0.0626276	0.10222
VIT_00s0230g00050	-0.430269	-0.291884	0.0789023	-0.206882	-0.111616	-0.150761	-0.160971	-0.50528	-0.00819174	-0.283583	0.144359	0.165961	-0.139774	0.081933	-0.54341	-0.0806691	-0.0595081	-0.223899	0.0673156	-0.0671656	-0.375192	-0.151365	0.414817	0.0483342	0.781633	0.313352	-0.0561163	0.0385399	-0.53281	-0.00131317	0.533993	0.867831	0.204538	0.255386	0.0114614	0.441358	0.400722	0.0403844	0.288028	0.0434563	0.153636	0.395033	0.294301	0.39803	0.828829	0.704078	-0.0135267	0.0484178	0.0632117
VIT_00s0230g00060	-0.328193	-0.189645	-0.0247679	-0.283786	0.0308628	-0.0348551	-0.175851	-0.453617	-0.0852794	-0.323698	0.179033	0.252681	-0.120725	0.158545	-0.490898	-0.0700658	-0.0171282	-0.152929	0.158323	-0.11853	-0.27431	-0.202464	0.356399	-0.119949	0.665311	0.10327	-0.00809285	-0.0776014	-0.494826	-0.00951374	0.397689	0.73443	-0.0241779	0.102002	-0.00287588	0.379452	0.411396	0.0705776	0.219164	0.0687836	0.103157	0.49228	0.494623	0.46501	0.86403	0.713804	-0.0389127	-0.0310242	0.142313
VIT_00s0231g00020	0.15831	-0.157716	0.575507	0.245537	0.452112	0.590256	0.526773	0.580406	0.706514	0.596246	0.621749	0.475947	0.451915	0.425099	0.424238	0.624521	0.391639	0.464266	0.349646	0.29154	0.559577	0.478916	0.418904	0.218362	0.306096	0.247272	-0.143182	-0.138223	-0.0562878	-0.385081	-0.493587	-0.209496	-0.0533622	-0.278238	-0.368678	-0.0517122	-0.620563	-0.738841	-0.31543	-0.606745	-0.575978	-0.378717	-0.160475	0.30455	-0.0920714	0.260448	-0.389627	-0.0156049	0.19255
VIT_00s0231g00040	-0.260294	-0.525529	0.341902	0.245023	-0.245105	-0.115007	0.39768	0.108979	0.291751	0.163464	0.122771	-0.0515603	-0.0829705	-0.0614776	-0.167587	0.110279	-0.174909	-0.200548	-0.108729	0.180314	-0.0348528	0.180913	0.289507	0.691049	0.310239	0.350588	0.061029	0.403601	0.0605545	0.150814	0.15928	0.284465	0.571681	0.324299	0.0514258	0.168799	-0.0354137	-0.338929	0.370504	-0.105362	0.0926088	-0.215851	-0.227945	0.268216	0.104871	0.236548	-0.311288	-0.119176	-0.226347
VIT_00s0231g00050	-0.297578	-0.143529	-0.30638	-0.354711	-0.121257	-0.32174	-0.473489	-0.651674	-0.236312	-0.489639	-0.276458	-0.185626	-0.394076	-0.0988598	-0.538878	-0.364724	-0.210145	-0.421608	-0.101465	-0.329874	-0.718789	-0.402553	-0.0273911	-0.108887	0.445869	0.223916	-0.0404689	-0.1517	-0.50489	0.0350482	0.784359	0.812797	0.116912	0.15369	0.13043	0.209046	0.527536	0.352871	0.389462	0.367764	0.300131	0.491222	0.142364	-0.16356	0.504964	0.177653	0.132282	0.0401448	0.124058
VIT_00s0231g00070	0.196667	0.234561	0.0297593	0.210742	-0.0875974	0.129899	0.328763	0.352347	-0.0977743	0.268201	0.0693676	0.0277863	-0.0424596	-0.0237497	0.283952	0.138268	0.0270742	0.174053	0.00974829	0.261115	0.291409	0.0637613	-0.153121	0.106926	-0.452516	-0.207023	0.245747	0.320548	0.738987	0.389542	-0.407159	-0.529204	-0.137332	-0.103164	0.0531858	-0.183431	-0.171544	-0.0156921	-0.177266	-0.0866173	-0.00196854	-0.295947	-0.101641	0.0762604	-0.37663	-0.247714	-0.0391868	-0.0216763	-0.339416
VIT_00s0233g00010	-0.306533	-0.269911	0.0313884	-0.040214	0.0404441	0.271064	0.131196	0.0563094	0.0553081	-0.0228314	-0.135738	-0.188527	-0.175362	-0.315916	-0.147125	0.00317425	-0.195246	-0.0909769	0.556957	0.252563	0.193666	0.312127	0.270988	0.422535	0.026347	0.0979733	-0.517506	-0.319106	-0.234278	-0.191126	-0.115405	-0.0209063	0.375713	0.192396	0.25017	0.386092	0.0578869	-0.00311424	0.204446	0.0499788	0.139429	-0.189355	-0.087437	0.0990932	0.0652302	0.211738	-0.0618571	0.01049	-0.0853538
VIT_00s0233g00020	-0.427731	-0.119533	-0.525958	-0.218692	-0.599665	-0.580556	-0.652313	-0.664471	-0.715229	-0.63378	-0.754034	-0.703855	-0.60018	-0.747081	-0.578406	-0.769792	-0.60522	-0.625609	-0.0325002	-0.105878	-0.416086	-0.174146	-0.185287	-0.0621174	-0.254203	-0.116293	-0.128014	0.037829	-0.155146	0.243588	0.459239	0.188658	0.461998	0.595784	0.613347	0.379638	0.689142	0.786657	0.520913	0.708913	0.78472	0.168502	0.00479634	-0.264523	0.0940462	-0.127457	0.445304	0.0918639	-0.299358
VIT_00s0233g00030	-0.532608	-0.53853	-0.595677	-0.517235	-0.232075	-0.225636	-0.28895	-0.426954	-0.527619	-0.592403	-0.42669	-0.488596	-0.686546	-0.5091	-0.744928	-0.55958	-0.721563	-0.691577	0.235267	-0.0533022	-0.293538	-0.0710484	0.138183	0.303159	0.0648142	-0.0326416	0.211308	-0.00307062	-0.140193	0.394279	0.345033	0.418532	0.253964	0.210629	0.671968	0.528857	0.636266	0.328191	0.741064	0.661558	0.666006	0.280116	0.279046	0.0540415	0.500419	0.299015	-0.119706	-0.237848	-0.096158
VIT_00s0233g00050	-0.490614	-0.447333	-0.0834111	-0.0689866	-0.336396	-0.198544	-0.277664	-0.206651	-0.0511909	0.0259232	-0.37916	-0.645934	-0.307301	-0.640068	-0.267683	-0.347017	-0.487212	-0.448506	0.0945253	0.120495	-0.144633	0.393675	0.213226	0.419708	0.0933077	0.644818	-0.246651	0.0462752	-0.0379777	0.0763481	0.273184	0.161437	0.654574	0.293001	0.503021	0.403774	0.0142749	0.0875817	0.415457	0.273441	0.440597	-0.500981	-0.76618	-0.507676	-0.312823	-0.190508	0.210958	0.0170033	-0.307799
VIT_00s0233g00060	-0.162315	-0.082057	-0.0992168	-0.0181593	-0.205113	-0.232745	-0.232106	-0.171261	-0.0306885	0.075898	-0.33488	-0.503627	-0.12619	-0.357452	-0.0215288	-0.20494	-0.197729	-0.230928	-0.154537	-0.156754	-0.344755	0.109004	-0.0691218	0.217735	0.0700592	0.62834	-0.120634	0.0393426	0.0205833	-0.0180217	0.397208	0.169753	0.302691	0.0624467	0.205135	0.0218346	-0.0927043	0.150296	0.102443	0.190194	0.215169	-0.369246	-0.805564	-0.696044	-0.483352	-0.456479	0.383722	0.125702	-0.170163
VIT_00s0233g00140	-0.237113	-0.153381	-0.163498	-0.0222085	-0.291696	-0.372785	-0.374162	-0.491767	-0.292409	-0.451526	-0.485489	-0.420872	-0.304257	-0.392799	-0.378313	-0.434679	-0.296547	-0.366977	0.00677171	-0.283531	-0.341164	-0.121337	-0.0695831	-0.0579088	-0.0216117	0.0237672	-0.344382	-0.122736	-0.484039	-0.252918	0.384384	0.280878	0.362305	0.502084	0.221522	0.243533	0.403959	0.402111	0.298879	0.399186	0.402109	0.198881	0.0226517	-0.16434	0.162115	0.0180639	0.26215	0.0820098	0.0565846
VIT_00s0233g00170	-0.496653	-0.301133	-0.460998	-0.465433	-0.283463	-0.192158	-0.302141	-0.401257	-0.573573	-0.503605	-0.198866	-0.202672	-0.507964	-0.391659	-0.640568	-0.493091	-0.529968	-0.48917	0.16853	0.041391	-0.0470737	-0.0355918	0.203077	0.00950795	0.0323291	-0.267085	0.171496	0.0321302	-0.0229579	0.481708	0.0923418	0.223362	0.121209	0.186683	0.554018	0.519828	0.591617	0.332366	0.528778	0.446128	0.5379	0.287467	0.498212	0.343768	0.606286	0.476412	-0.0480061	-0.0923443	-0.212029
VIT_00s0233g00180	-0.352251	-0.239078	-0.136359	-0.126523	-0.284764	-0.317519	-0.229826	-0.317661	-0.143111	-0.0899947	-0.213871	-0.37461	-0.136856	-0.325448	-0.28579	-0.284725	-0.306333	-0.36088	-0.172423	-0.199044	-0.345788	0.0649575	0.134121	0.239946	0.319041	0.574658	0.00422342	0.132274	-0.0512444	0.0954732	0.455218	0.404875	0.26969	0.121722	0.284791	0.224633	0.122336	0.155907	0.274902	0.261544	0.341428	-0.184673	-0.480771	-0.311196	-0.0526286	-0.0460922	0.274764	0.0446191	-0.168669
VIT_00s0233g00190	-0.431846	-0.234514	-0.428247	-0.39601	-0.210888	-0.379684	-0.609465	-0.647609	-0.372217	-0.445886	-0.50938	-0.584326	-0.340543	-0.474104	-0.50908	-0.531372	-0.413277	-0.501137	-0.00350316	-0.361888	-0.574772	-0.087159	0.061726	0.0259573	0.310533	0.520871	-0.15688	-0.178455	-0.488797	-0.124654	0.701128	0.61641	0.246404	0.20633	0.408262	0.361119	0.381809	0.46452	0.386733	0.542912	0.498053	0.121206	-0.336113	-0.526239	0.123521	-0.0467674	0.483469	0.187347	0.0607184
VIT_00s0238g00020	-0.0874999	0.437151	-0.268719	-0.00737113	-0.429596	-0.475493	-0.561308	-0.683003	-0.585501	-0.528792	-0.507114	-0.238931	-0.280735	-0.28539	-0.273399	-0.457678	-0.0475493	-0.186983	-0.139122	-0.219913	-0.491852	-0.475546	-0.342558	-0.478002	-0.155049	-0.261051	-0.283071	-0.047539	-0.265699	-0.00752394	0.48491	0.219324	0.0979323	0.487315	0.0923933	0.052107	0.614252	0.865992	0.0121911	0.400497	0.403953	0.412495	0.213841	-0.10029	0.16503	-0.10025	0.629937	0.111322	-0.149242
VIT_00s0238g00040	0.268121	0.0758914	-0.24549	0.0255942	0.115507	0.1282	0.112469	0.339669	-0.122685	-0.0214563	-0.249632	-0.203161	-0.132111	-0.152252	0.230166	-0.0665345	-0.130858	0.00692287	0.081589	0.0491726	0.287761	0.0484792	-0.355366	-0.0065731	-0.744322	-0.550757	0.0132732	-0.169385	0.302619	0.0509224	-0.459787	-0.688299	-0.131414	-0.118252	0.123114	-0.247886	-0.072395	0.0463755	-0.00493499	0.149163	0.0140956	-0.094331	0.126244	-0.154482	-0.414787	-0.403776	-0.226098	-0.200514	0.027811
VIT_00s0238g00060	-0.29682	-0.196512	-0.142119	-0.286809	-0.119255	-0.315484	-0.270886	-0.618701	-0.173389	-0.487778	-0.0362863	0.0685194	-0.224419	0.108451	-0.578582	-0.204184	-0.0908542	-0.302198	-0.0977296	-0.278742	-0.623083	-0.423822	0.146369	-0.0603878	0.658722	0.174346	0.106556	0.0269373	-0.57074	0.0217659	0.718955	0.933721	0.0509149	0.222229	-0.0126734	0.259837	0.54009	0.20983	0.306189	0.227194	0.20065	0.627632	0.399971	0.226358	0.811136	0.510642	0.0261817	0.0294833	0.169783
VIT_00s0238g00070	0.311938	0.159651	-0.420587	-0.0665126	0.0452629	-0.200201	-0.120111	-0.203185	-0.398143	-0.587323	-0.398403	-0.102528	-0.271124	0.0707612	-0.165026	-0.28157	-0.119315	-0.18289	-0.0648353	-0.261986	-0.311761	-0.631008	-0.566337	-0.274927	-0.489386	-0.764841	0.231981	-0.0707668	-0.137567	-0.0502415	0.170609	-0.0230354	-0.311168	0.0975943	-0.0158971	-0.279472	0.494389	0.414214	0.176085	0.444996	0.188987	0.710398	0.731096	0.0396125	0.223782	-0.17434	-0.140513	-0.312591	0.338958
VIT_00s0238g00080	-0.0842934	-0.249924	-0.61587	-0.262679	-0.185942	-0.49486	-0.277266	-0.426234	-0.460646	-0.62623	-0.727955	-0.671492	-0.525109	-0.374314	-0.451326	-0.563544	-0.541703	-0.631812	-0.258302	-0.441492	-0.70585	-0.477025	-0.451329	0.249884	-0.237001	-0.0564047	0.187663	-0.00587811	-0.200593	0.0791972	0.668574	0.387176	0.123934	0.187033	0.355483	-0.0591433	0.531658	0.476284	0.586449	0.749551	0.539354	0.407568	0.0284845	-0.512388	0.0094622	-0.376732	0.0335752	-0.19487	0.16207
VIT_00s0238g00090	-0.0591431	-0.0807382	-0.164164	-0.0780734	-0.139814	-0.491485	-0.346827	-0.606038	-0.122167	-0.456745	-0.329893	-0.211516	-0.20621	0.0470085	-0.385024	-0.267243	-0.0849409	-0.345417	-0.373921	-0.501899	-0.865512	-0.561935	-0.223187	-0.0760259	0.394442	0.274765	0.046667	0.0545125	-0.526322	-0.164511	0.906417	0.835927	0.0949006	0.258144	-0.0996013	-0.0604338	0.42866	0.309303	0.260367	0.336949	0.213846	0.52618	0.0271756	-0.290183	0.321779	-0.0506367	0.172275	-0.00546767	0.266735
VIT_00s0238g00130	-0.223433	-0.1926	-0.170469	-0.219236	-0.069664	-0.331407	-0.305379	-0.567034	-0.0721865	-0.377004	-0.22866	-0.196481	-0.230261	-0.00499794	-0.433692	-0.218593	-0.123139	-0.337616	-0.154022	-0.392949	-0.750959	-0.359412	0.0138846	0.0546893	0.571996	0.470733	-0.0224733	-0.0620428	-0.56986	-0.16331	0.840325	0.890099	0.120804	0.158673	-0.000715412	0.127272	0.36289	0.217971	0.281648	0.29309	0.202639	0.393275	-0.0720242	-0.248661	0.389436	0.119498	0.158123	0.0448647	0.223373
VIT_00s0240g00050	0.129897	0.265394	-0.0415139	-0.0205494	-0.0178715	-0.180264	-0.0610412	-0.296567	-0.194968	-0.354769	0.0117094	0.282004	0.180467	0.281076	-0.136206	-0.00343844	0.217129	0.10724	-0.182405	-0.220389	-0.261228	-0.505935	-0.184924	-0.314278	0.108307	-0.387892	0.0703041	0.0590246	-0.264513	-0.0743268	0.27205	0.310975	-0.237332	0.134055	-0.227114	-0.0964564	0.372458	0.301512	-0.0870177	0.0495663	-0.0200047	0.636497	0.621338	0.361362	0.491092	0.230707	0.147187	0.0940855	0.188359
VIT_00s0245g00010	0.000949987	-0.0622236	-0.407196	-0.117405	-0.0420014	-0.14556	-0.0401764	-0.0192037	-0.266541	-0.203265	-0.521223	-0.566195	-0.21851	-0.373916	-0.0608283	-0.248595	-0.339687	-0.255427	-0.00756059	-0.171481	-0.210843	-0.0693703	-0.293943	0.310729	-0.3709	0.053283	0.000251392	-0.0819573	0.0685938	-0.0165738	0.181754	-0.0841767	0.0841672	0.010502	0.319102	-0.0524449	0.106402	0.307769	0.216106	0.440209	0.324256	-0.0827906	-0.311075	-0.513629	-0.392436	-0.474547	0.255042	0.0962627	-0.0064988
VIT_00s0245g00030	-0.531239	-0.37282	-0.548062	-0.435006	-0.425477	-0.413773	-0.442569	-0.554796	-0.627039	-0.595091	-0.442569	-0.471453	-0.60142	-0.541865	-0.729779	-0.630491	-0.658825	-0.660478	0.0574388	-0.0588654	-0.348241	-0.128188	0.0923371	0.0896411	0.0575532	-0.0272559	0.209462	0.137409	-0.0937048	0.471763	0.389181	0.416359	0.27354	0.340939	0.633052	0.520603	0.662449	0.450989	0.619116	0.617361	0.699045	0.26506	0.23707	0.0253622	0.47231	0.256432	0.0283593	-0.0622333	-0.234979
VIT_00s0245g00050	-0.334049	-0.167522	-0.377676	-0.24263	-0.418935	-0.548324	-0.436719	-0.671914	-0.50727	-0.583766	-0.412029	-0.372198	-0.33281	-0.311727	-0.598097	-0.50852	-0.373214	-0.476664	-0.190754	-0.349636	-0.590137	-0.356839	-0.0425006	0.0020571	0.226777	0.148192	0.209045	0.24453	-0.270584	0.15677	0.673686	0.639016	0.175164	0.395269	0.320286	0.293692	0.597695	0.509907	0.390604	0.531405	0.547454	0.411284	0.107813	-0.0902453	0.414294	0.120628	0.319963	0.0850548	-0.0337615
VIT_00s0245g00060	0.367512	0.287373	0.240201	0.12753	0.213852	0.102297	0.163275	0.297069	0.27372	0.30091	0.431715	0.452202	0.491843	0.481773	0.386231	0.370815	0.431165	0.428803	-0.295882	-0.106782	0.212758	0.00421477	-0.0164035	-0.334489	0.0620673	-0.0785985	0.234789	0.0950413	0.135535	-0.0546405	-0.32657	-0.220804	-0.423135	-0.303522	-0.434214	-0.330757	-0.393351	-0.345851	-0.519259	-0.418688	-0.482908	-0.0284343	0.0687975	0.114505	-0.0826956	-0.0108877	-0.0954493	0.0238939	0.177824
VIT_00s0245g00070	0.36927	-0.0229175	-0.053385	-0.0144127	0.497113	0.143345	-0.0327832	0.0334647	0.204701	-0.218842	-0.0196957	0.133262	0.124012	0.364002	0.0653831	0.0956184	0.160356	0.093009	0.0485032	-0.416515	-0.070192	-0.245454	-0.172205	-0.252537	-0.0520707	-0.262489	0.0219265	-0.324885	-0.501345	-0.640503	0.00769751	0.0733276	-0.40528	-0.167737	-0.298533	-0.230095	-0.0221455	-0.141188	-0.0550502	0.0506695	-0.233957	0.459072	0.431578	-0.0463754	0.170001	-0.0102339	-0.2626	-0.169916	0.801789
VIT_00s0246g00010	-0.125505	-0.0105509	0.293786	0.21869	-0.178409	0.179488	0.202438	0.210485	0.0375201	0.262323	0.238025	0.185163	0.0147818	-0.0737797	0.075359	0.11352	0.00903906	0.104432	0.242677	0.827346	0.427228	0.286759	0.209215	0.0962667	-0.0895232	-0.160781	-0.102292	0.197045	0.353927	0.321113	-0.3966	-0.318131	0.244028	0.164412	0.0713993	0.173806	-0.0799461	-0.152123	-0.0203254	-0.261986	-0.0104362	-0.278538	0.0641613	0.404119	0.0168143	0.224859	-0.222419	-0.0161392	-0.437184
VIT_00s0246g00050	-0.242492	-0.180246	0.1757	0.0306827	-0.0856526	0.302707	0.160575	0.270346	0.0640859	0.31594	0.184271	0.00613359	-0.0506905	-0.224193	0.0586324	0.0817951	-0.120365	0.0384812	0.42379	0.853164	0.483297	0.49007	0.315533	0.25471	-0.0594009	0.0476455	-0.104575	0.0573309	0.318838	0.301382	-0.417702	-0.340516	0.30863	0.0274578	0.248479	0.275293	-0.189821	-0.222417	0.0602781	-0.195883	0.0199225	-0.457802	-0.190973	0.191435	-0.125022	0.151677	-0.160149	0.0393728	-0.436421
VIT_00s0246g00060	-0.0352881	-0.103776	0.17012	0.112982	-0.0427445	0.148958	0.139253	0.223097	0.0842652	0.228508	0.190012	0.0951979	0.0397122	-0.00378721	0.0855809	0.0919882	-0.0313415	0.0416413	0.158264	0.589446	0.303565	0.220729	0.131655	0.0668914	-0.0569028	-0.0679703	0.0676767	0.145576	0.249613	0.234015	-0.262854	-0.224317	0.152622	0.0212859	0.058799	0.061671	-0.136287	-0.210701	0.0256836	-0.157071	-0.0415294	-0.231875	-0.0270241	0.181922	-0.0633732	0.0720565	-0.246876	-0.0239124	-0.256583
VIT_00s0246g00070	-0.4717	-0.24153	0.209988	-0.171471	-0.0954286	0.320471	0.155452	0.0802679	0.0171399	0.210029	0.45237	0.29369	-0.0325792	-0.086028	-0.193306	0.106684	-0.0666852	0.0456155	0.498572	0.74689	0.479026	0.459885	0.658765	0.236528	0.397064	0.129206	-0.0333564	0.0667743	0.12557	0.346555	-0.327422	0.0290908	0.202939	0.00194935	0.227785	0.542348	-0.028192	-0.245057	0.100877	-0.268362	0.0134791	-0.239653	0.122148	0.619712	0.432261	0.703496	-0.166013	0.0774347	-0.416802
VIT_00s0246g00080	-0.251873	-0.0268325	-0.0161101	-0.0223015	-0.313443	0.000759555	-0.10854	-0.0617912	-0.230026	0.0270546	-0.0300444	-0.0840763	-0.356707	-0.297377	-0.139824	-0.175723	-0.213432	-0.138113	0.234115	0.655442	0.175012	0.188378	0.114334	0.000138529	-0.141444	-0.113137	-0.0151126	0.144332	0.301309	0.452104	-0.185282	-0.194521	0.255186	0.192961	0.297595	0.269422	0.132671	0.0998627	0.129069	0.0262815	0.222349	-0.194707	0.00504056	0.141404	0.0330851	0.104049	-0.0859657	-0.0601516	-0.479321
VIT_00s0246g00090	-0.0439949	-0.0674042	-0.072851	0.0213627	-0.0260663	0.0907398	-0.0367649	0.0562371	-0.122857	0.0103223	-0.136625	-0.177841	-0.244709	-0.213099	-0.0325327	-0.13591	-0.21668	-0.139911	0.214431	0.506968	0.135487	0.10511	-0.044703	0.0685957	-0.288881	-0.124643	-0.00514256	0.0492748	0.241072	0.161942	-0.151024	-0.228594	0.0854324	0.0243981	0.245738	0.0914153	0.0321569	0.0400361	0.177645	0.124103	0.180666	-0.123951	-0.0201545	-0.0791367	-0.135344	-0.122499	-0.11421	-0.202417	-0.11539
VIT_00s0246g00100	-0.160385	-0.0444834	0.291525	0.255552	-0.274033	0.138698	0.198681	0.213714	0.02186	0.255094	0.200596	0.133671	-0.0909624	-0.134579	0.0488279	0.0699445	-0.0518657	0.0441494	0.267692	0.775737	0.423558	0.295954	0.198585	0.105308	-0.135245	-0.184077	-0.0725898	0.250553	0.412003	0.389083	-0.401445	-0.357109	0.332011	0.240561	0.111216	0.178073	-0.0480357	-0.132297	0.0316805	-0.231823	0.0491264	-0.328347	0.0365954	0.426102	-0.0140337	0.200333	-0.252101	-0.108959	-0.546857
VIT_00s0246g00110	0.0894347	0.201634	0.422579	0.366093	-0.157642	0.144487	0.309031	0.217605	0.0945393	0.26115	0.353952	0.432902	0.149762	0.198272	0.183657	0.244222	0.242931	0.269417	0.0399313	0.684956	0.350756	0.00751126	0.0451733	-0.115938	-0.118355	-0.397114	0.000169794	0.327657	0.396673	0.324038	-0.364872	-0.30214	0.101043	0.173872	-0.191526	-0.0466899	-0.0389618	-0.136646	-0.159743	-0.37826	-0.146916	-0.0508013	0.316157	0.595465	0.114949	0.228956	-0.248561	-0.104237	-0.37757
VIT_00s0246g00120	-0.259946	-0.168024	-0.0479606	-0.230675	0.133858	0.330583	0.0269101	0.0836647	-0.0200846	0.128065	0.119602	-0.01012	-0.149737	-0.145027	-0.0861487	0.0246613	-0.144078	-0.0249653	0.454262	0.626858	0.250945	0.302694	0.29762	0.17344	0.093748	0.138838	-0.0814595	-0.145958	0.0730374	0.165215	-0.16859	-0.0300586	0.0620409	-0.177343	0.264585	0.311286	-0.0622502	-0.114166	0.116511	-0.0250291	0.0537632	-0.192441	-0.0720251	0.0599079	0.0813601	0.201593	-0.0770013	0.0772198	-0.153498
VIT_00s0246g00140	-0.161821	0.0825451	0.469768	0.275968	-0.177151	0.304817	0.264719	0.276098	0.129065	0.437961	0.417553	0.329483	0.139081	-0.0173641	0.184249	0.265218	0.165816	0.283098	0.373159	0.908035	0.554951	0.412821	0.365584	0.0752173	0.0565007	-0.0166	-0.186485	0.210431	0.37624	0.291751	-0.479631	-0.34263	0.260006	0.144098	-0.00734864	0.216765	-0.216807	-0.219309	-0.194317	-0.452088	-0.133341	-0.425619	-0.0642015	0.514274	-0.00512869	0.325693	-0.0742847	0.0562345	-0.576635
VIT_00s0246g00150	-0.0851989	0.0426325	0.176051	0.0243484	-0.0352952	0.309733	0.295314	0.298222	0.0670927	0.354965	0.296597	0.169904	0.0666094	-0.0225881	0.171227	0.222737	0.0807668	0.214231	0.339879	0.61976	0.395651	0.348636	0.260681	0.247129	0.0371298	0.128324	0.065429	0.136421	0.391101	0.271734	-0.38003	-0.260727	0.0190669	-0.145515	0.070252	0.138986	-0.260297	-0.226832	-0.193991	-0.287143	-0.130535	-0.375221	-0.197395	0.177565	-0.116881	0.112862	-0.105842	0.0264149	-0.374277
VIT_00s0246g00170	-0.221013	0.0304167	0.429293	0.225099	-0.100633	0.361841	0.291375	0.190857	0.140974	0.372839	0.319681	0.225874	0.0703824	-0.0672428	0.130719	0.260618	0.149638	0.261679	0.493054	0.737918	0.458008	0.42891	0.422274	0.216421	0.154279	0.174453	-0.351465	0.066187	0.185907	0.0378486	-0.363787	-0.190573	0.273348	0.133747	0.0173898	0.301434	-0.20418	-0.183987	-0.176155	-0.386339	-0.102085	-0.409149	-0.170444	0.398703	0.00471376	0.336711	0.0441861	0.114617	-0.40778
VIT_00s0246g00190	0.174827	0.14425	0.644761	0.451341	0.108231	0.41115	0.493396	0.49808	0.441903	0.591546	0.624266	0.554732	0.416184	0.360185	0.444579	0.556907	0.436791	0.534232	0.251201	0.607632	0.593143	0.351789	0.307227	0.0510477	0.133287	0.0332472	-0.0503606	0.212189	0.286008	-0.0578618	-0.549185	-0.36341	-0.0178261	-0.0410684	-0.359322	-0.0646533	-0.491577	-0.49246	-0.443988	-0.638006	-0.456481	-0.38481	-0.0701378	0.500826	-0.0987153	0.24529	-0.217885	0.092074	-0.195237
VIT_00s0246g00200	0.125049	0.348501	0.538353	0.256003	0.172775	0.51395	0.501554	0.444161	0.388402	0.628386	0.663501	0.639077	0.351643	0.393634	0.465784	0.598438	0.541223	0.60732	0.271548	0.646301	0.50055	0.27521	0.277962	-0.00770129	0.188999	0.0571276	-0.140209	0.0455478	0.389127	0.125294	-0.498642	-0.301701	-0.147053	-0.272541	-0.363804	-0.0819724	-0.440435	-0.377802	-0.530458	-0.686344	-0.511216	-0.357055	-0.0730851	0.450751	-0.0647146	0.24766	-0.0740716	0.232137	-0.321157
VIT_00s0246g00210	-0.266439	-0.105104	0.352766	0.210793	-0.267219	0.205527	0.182358	0.187617	0.0558157	0.348615	0.253956	0.104258	-0.0494826	-0.198797	0.042365	0.0976015	-0.0507867	0.0771912	0.371458	0.923578	0.47405	0.44801	0.350309	0.199128	0.00599437	0.0454629	-0.115208	0.257346	0.370038	0.349004	-0.386997	-0.295914	0.404449	0.221389	0.178555	0.312447	-0.133378	-0.184589	0.0141187	-0.279353	0.0496191	-0.461585	-0.159663	0.369628	-0.0463897	0.248206	-0.122259	0.0709238	-0.573464
VIT_00s0246g00220	-0.325036	-0.125612	0.437051	0.194444	-0.189978	0.289594	0.256392	0.218253	0.160143	0.432667	0.347008	0.168108	0.055895	-0.154664	0.0567107	0.18994	0.00889487	0.129842	0.408776	0.950263	0.492889	0.512615	0.473962	0.285659	0.172391	0.203974	-0.227258	0.20076	0.311853	0.286266	-0.362995	-0.201013	0.416827	0.155785	0.140033	0.363465	-0.204834	-0.259063	-0.0154343	-0.366699	-0.0147577	-0.51934	-0.241357	0.389124	-0.00877531	0.338467	-0.0855823	0.0643893	-0.56304
VIT_00s0246g00230	-0.230426	-0.051072	0.426872	0.149507	-0.0896342	0.34265	0.295197	0.299152	0.214854	0.49122	0.432022	0.255602	0.140293	-0.0332032	0.163757	0.29861	0.121296	0.250258	0.377039	0.905909	0.515152	0.513864	0.453957	0.254907	0.203246	0.223209	-0.160941	0.140732	0.290492	0.249579	-0.410954	-0.224559	0.281203	0.0142027	0.0330118	0.264241	-0.323337	-0.340395	-0.165751	-0.458705	-0.174372	-0.513779	-0.257701	0.340282	-0.0501971	0.299608	-0.0632761	0.179323	-0.50164
VIT_00s0246g00240	-0.428262	-0.0943064	0.292896	-0.000666782	-0.178606	0.295885	0.140152	0.0964715	0.0394776	0.31922	0.318056	0.162772	-0.0154324	-0.201266	-0.0579979	0.117732	-0.029263	0.0905662	0.484136	0.911863	0.44432	0.495778	0.536804	0.227576	0.257114	0.213628	-0.249689	0.0744219	0.223691	0.318243	-0.312941	-0.0939626	0.344467	0.0992458	0.226582	0.484674	-0.0990293	-0.147299	-0.00192721	-0.300126	0.0407563	-0.424326	-0.149229	0.395918	0.144693	0.454813	0.0121597	0.132566	-0.550785
VIT_00s0250g00020	0.259647	0.443225	-0.0758191	-0.110744	0.254685	0.0104847	-0.107993	-0.199118	-0.0439242	-0.245266	0.00983526	0.290921	0.143984	0.343523	0.0814775	0.123162	0.40154	0.297502	-0.0490988	-0.359702	-0.201899	-0.389674	-0.194067	-0.409211	0.083548	-0.267505	-0.180709	-0.360923	-0.473745	-0.406952	0.162195	0.184057	-0.408796	-0.10192	-0.367801	-0.205303	0.149627	0.275946	-0.330275	-0.0339099	-0.25615	0.52805	0.427318	0.0711245	0.277574	0.0774274	0.299113	0.168663	0.404005
VIT_00s0250g00030	0.0858125	-0.188675	-0.514578	-0.205271	0.0880126	-0.136017	-0.146175	-0.0302136	-0.329383	-0.370297	-0.497536	-0.505001	-0.256369	-0.283966	-0.153741	-0.372542	-0.43965	-0.359452	-0.0557526	-0.352896	-0.109158	-0.147573	-0.324979	0.0830046	-0.502363	-0.252226	0.175546	-0.0987496	0.0204787	-0.0834768	0.0312668	-0.17139	-0.142894	-0.0693496	0.337861	-0.0768676	0.164712	0.194526	0.328302	0.540414	0.329009	0.156067	0.0828493	-0.383073	-0.196825	-0.369674	-0.0832403	-0.352505	0.314381
VIT_00s0250g00040	0.190325	0.201399	-0.33296	-0.233501	0.0210863	-0.274074	-0.221999	-0.392187	-0.289576	-0.496961	-0.139393	0.10296	-0.101759	0.264301	-0.220934	-0.135626	0.0969375	-0.0565193	-0.237985	-0.478401	-0.545251	-0.653241	-0.336623	-0.316257	0.115031	-0.291801	0.350373	-0.00845959	-0.320133	0.00430087	0.459798	0.444151	-0.370069	-0.0119119	-0.200402	-0.211542	0.417663	0.314871	-0.0399182	0.247335	0.00136008	0.734423	0.520406	0.0113306	0.425642	0.0198993	0.0352647	-0.00505517	0.319705
VIT_00s0250g00090	-0.420143	-0.586744	-0.24531	-0.208421	-0.391894	-0.51633	-0.210671	-0.506552	-0.271355	-0.526417	-0.261302	-0.305639	-0.529464	-0.235187	-0.702708	-0.455797	-0.517156	-0.650846	-0.166199	-0.204281	-0.52117	-0.239794	0.114321	0.311484	0.357879	0.135146	0.296899	0.258057	-0.339856	0.234753	0.616192	0.717192	0.391947	0.432771	0.294639	0.323645	0.551635	0.115918	0.693068	0.447559	0.477485	0.382128	0.233026	0.118393	0.586067	0.338929	-0.262097	-0.179383	-0.023599
VIT_00s0252g00010	0.213246	-0.0943963	0.234955	-0.0562537	0.622267	0.559855	0.346092	0.573944	0.567615	0.520719	0.496407	0.307668	0.454651	0.38792	0.450369	0.541826	0.318104	0.443972	0.23306	-0.0285658	0.452922	0.459339	0.321964	0.150306	0.279736	0.422598	0.0188901	-0.275231	-0.0633142	-0.415924	-0.421783	-0.186182	-0.353777	-0.609757	-0.27999	-0.121481	-0.727682	-0.700514	-0.412955	-0.457953	-0.60053	-0.381182	-0.363427	-0.125001	-0.273688	0.00620159	-0.237641	0.0237401	0.383804
VIT_00s0252g00020	0.186195	0.313297	0.524825	0.507835	-0.18464	0.112802	0.243905	0.300224	0.20852	0.449182	0.26403	0.268321	0.292938	0.0881935	0.444753	0.277391	0.352376	0.400687	-0.0290673	0.411819	0.420627	0.220481	0.000637366	-0.117872	-0.218356	-0.125928	-0.198346	0.230549	0.348304	0.00739891	-0.421575	-0.517034	0.189341	0.179956	-0.253991	-0.170951	-0.337813	-0.136411	-0.380085	-0.450733	-0.255854	-0.384141	-0.17969	0.222705	-0.357082	-0.10085	0.130455	0.00914788	-0.358763
VIT_00s0252g00030	0.329527	0.171136	0.105807	-0.173228	0.58634	0.508066	0.358431	0.553243	0.381615	0.424367	0.637465	0.586223	0.510287	0.595387	0.452397	0.555923	0.455151	0.539557	0.0473815	0.0121607	0.431373	0.186355	0.163634	-0.101346	0.171461	-0.023964	0.330603	-0.180769	0.174612	-0.0200793	-0.482607	-0.245001	-0.619176	-0.742425	-0.370602	-0.279463	-0.542735	-0.546866	-0.495556	-0.491079	-0.657326	-0.0728955	0.112506	0.17345	-0.0342076	0.118396	-0.212589	0.13999	0.262007
VIT_00s0252g00040	-0.0343176	0.102529	-0.5157	-0.0963217	-0.425295	-0.620198	-0.599823	-0.657533	-0.723912	-0.775651	-0.714835	-0.466344	-0.46472	-0.37819	-0.461697	-0.699643	-0.395273	-0.506285	-0.246103	-0.330173	-0.565151	-0.613962	-0.54162	-0.37679	-0.425836	-0.54107	0.0914585	0.086535	-0.194457	0.12568	0.521034	0.186906	0.111332	0.491848	0.287954	-0.00890678	0.763429	0.78986	0.406685	0.694621	0.60598	0.612237	0.455435	-0.165984	0.200429	-0.2312	0.307551	-0.0574546	0.000846325
VIT_00s0252g00050	0.529258	0.417832	0.393101	0.171274	0.583813	0.581319	0.483244	0.617448	0.528113	0.565886	0.700356	0.726471	0.566895	0.725246	0.668709	0.716792	0.69779	0.769742	0.124436	0.160473	0.494456	0.132519	0.0797892	-0.219896	0.0818793	-0.045039	0.17015	-0.105529	0.198801	-0.266243	-0.577159	-0.375267	-0.654163	-0.628824	-0.610947	-0.411082	-0.665979	-0.568288	-0.735255	-0.674964	-0.797374	-0.124096	0.065198	0.2033	-0.164114	0.0229337	-0.171437	0.130048	0.286784
VIT_00s0252g00060	-0.332037	-0.35538	-0.509824	-0.630937	0.325684	0.226516	-0.341792	-0.24188	-0.205218	-0.366602	-0.245231	-0.3227	-0.29834	-0.281974	-0.3934	-0.270394	-0.357515	-0.288245	0.612845	-0.11096	-0.0563534	0.177976	0.265239	0.122627	0.190697	0.193035	-0.124185	-0.589191	-0.553445	-0.273965	0.13689	0.291473	-0.0904656	-0.20311	0.409658	0.44184	0.200567	0.132943	0.312366	0.409544	0.225402	0.160789	0.0672762	-0.238541	0.288064	0.219215	0.0274346	0.116569	0.358075
VIT_00s0252g00070	0.322409	-0.235039	-0.491864	-0.279391	0.378109	-0.0930542	-0.0348305	0.0333488	-0.0292705	-0.354027	-0.281848	-0.244103	-0.181409	0.168838	-0.0669842	-0.12507	-0.189416	-0.223159	-0.169549	-0.605775	-0.370803	-0.350055	-0.391338	0.071594	-0.167342	-0.113507	0.493053	-0.160894	-0.234225	-0.228474	0.252624	0.165921	-0.420934	-0.33973	-0.0270655	-0.344643	0.0505587	-0.100679	0.202089	0.389019	-0.0342783	0.419625	0.169635	-0.456204	-0.0468887	-0.364375	-0.376862	-0.221212	0.663651
VIT_00s0252g00110	-0.543254	-0.540789	-0.344664	-0.333781	-0.310344	-0.190277	-0.228703	-0.209506	-0.346693	-0.311394	-0.244565	-0.392725	-0.473818	-0.530983	-0.542952	-0.453348	-0.617151	-0.538236	0.181799	0.0277841	0.0530834	0.253412	0.297393	0.271231	0.00843856	0.0377661	0.0490807	0.0363533	-0.017826	0.342649	0.0126789	0.119592	0.338773	0.245924	0.603414	0.53848	0.349545	0.116264	0.581971	0.396356	0.517792	-0.0559426	0.0884587	0.118573	0.301022	0.308954	-0.201502	-0.066041	-0.246968
VIT_00s0252g00130	-0.152744	-0.119117	0.471309	0.288763	-0.213372	-0.0898888	0.356726	-0.0520097	0.264253	0.0781458	0.260403	0.319171	0.0508259	0.193009	-0.118848	0.246884	0.193823	0.0789361	-0.128706	0.224835	-0.102852	-0.0871722	0.218683	0.304883	0.391489	0.0539721	-0.1599	0.273388	-0.129145	0.0835528	0.190304	0.376819	0.400783	0.393426	-0.245939	0.0915537	0.134035	-0.125523	0.0956841	-0.285802	-0.0855741	0.14001	0.196677	0.574781	0.432431	0.463643	-0.116709	0.067236	-0.202498
VIT_00s0253g00040	-0.655571	-0.551881	-0.610924	-0.398837	-0.596136	-0.530545	-0.545225	-0.597155	-0.735487	-0.66408	-0.64086	-0.752839	-0.721497	-0.825589	-0.803716	-0.855902	-0.888991	-0.856671	0.127817	-0.0802945	-0.28846	0.0332463	0.104335	0.212864	-0.0803225	0.0149101	0.123694	0.118783	-0.139764	0.388736	0.384992	0.287256	0.499852	0.514345	0.829207	0.594855	0.694217	0.536118	0.807698	0.81325	0.89783	0.0999891	0.0534331	-0.0988258	0.30327	0.155204	0.0944878	-0.213125	-0.315811
VIT_00s0253g00050	-0.655639	-0.524911	-0.557385	-0.353091	-0.661666	-0.540007	-0.500544	-0.552057	-0.738294	-0.587669	-0.582333	-0.711835	-0.72955	-0.820268	-0.787448	-0.835829	-0.89671	-0.846816	0.0408078	0.037921	-0.252856	0.0165729	0.0858723	0.23105	-0.13333	-0.03675	0.245836	0.28442	0.0940109	0.596692	0.336273	0.231733	0.540135	0.509603	0.860603	0.591262	0.672016	0.491431	0.831636	0.735932	0.915527	0.0521575	0.059734	-0.0452237	0.272759	0.137967	0.119697	-0.0912904	-0.444493
VIT_00s0253g00060	-0.254639	0.114517	0.107555	-0.0348503	-0.246052	-0.18494	-0.355617	-0.432034	-0.0687665	-0.188603	-0.0602008	0.0680179	-0.0412714	-0.100027	-0.226614	-0.122986	0.109258	-0.0203086	0.0240478	0.054456	-0.188913	-0.0669796	0.131773	-0.286748	0.28632	0.0219238	-0.438432	-0.169444	-0.474705	-0.0852645	0.255751	0.321319	0.283278	0.392185	-0.0553355	0.258178	0.292459	0.29535	-0.0270178	-0.043472	0.0707354	0.196987	0.146826	0.142709	0.370063	0.306392	0.236864	0.222794	-0.138111
VIT_00s0253g00070	0.437356	0.339358	0.183793	0.386242	0.191257	0.118039	0.0643217	0.319361	0.313298	0.350106	-0.180153	-0.146332	0.247598	0.0359897	0.569174	0.172375	0.24983	0.245462	-0.181215	-0.0692549	0.0477237	0.0177681	-0.436176	-0.145547	-0.495509	0.019438	-0.374817	-0.194286	0.16629	-0.369414	-0.164711	-0.501866	-0.0631041	-0.146695	-0.257969	-0.493185	-0.423598	-0.048945	-0.32982	-0.158453	-0.242352	-0.354131	-0.508897	-0.612573	-0.82374	-0.753837	0.109566	-0.0103406	0.117057
VIT_00s0253g00090	-0.152965	-0.293483	-0.281217	-0.101544	-0.367932	-0.601504	-0.212731	-0.384386	-0.268844	-0.390569	-0.375725	-0.379652	-0.363367	-0.210009	-0.391115	-0.41037	-0.36943	-0.507245	-0.512221	-0.356981	-0.599713	-0.349793	-0.22787	0.205195	0.0502777	0.0950826	0.335101	0.299789	-0.0907813	0.270523	0.609565	0.457829	0.247751	0.266981	0.173787	-0.051618	0.376551	0.21666	0.472059	0.43276	0.364674	0.278587	-0.022306	-0.23532	0.127464	-0.146262	-0.00761242	-0.245858	-0.0515236
VIT_00s0253g00110	-0.339908	-0.431887	-0.145651	-0.220068	-0.259759	-0.284734	0.0130473	-0.185431	-0.118192	-0.178617	-0.0623212	-0.171184	-0.235904	-0.162859	-0.381432	-0.19576	-0.326644	-0.374405	-0.19038	-0.100055	-0.289132	-0.0353302	0.151578	0.436243	0.315337	0.233461	0.288039	0.216576	-0.045825	0.367797	0.376916	0.447093	0.306457	0.132439	0.227298	0.185609	0.225612	-0.0399627	0.42052	0.197191	0.232198	0.0842267	-0.0406068	0.0580634	0.280259	0.203089	-0.150163	-0.108491	-0.187468
VIT_00s0253g00140	0.206257	0.187261	0.324661	0.169954	0.182407	0.00939719	0.249053	-0.0295367	0.345182	0.124725	0.315804	0.419596	0.321288	0.554564	0.140146	0.394219	0.464697	0.282455	-0.258496	-0.213439	-0.354992	-0.334777	-0.0162482	-0.00142849	0.523471	0.276188	0.00750777	0.0783247	-0.225719	-0.222696	0.386204	0.516175	-0.182394	-0.111767	-0.540921	-0.275536	-0.100856	-0.184852	-0.282161	-0.321393	-0.381594	0.264419	0.0126081	0.115177	0.214951	0.120074	0.0265413	0.0455124	0.217228
VIT_00s0253g00160	-0.16412	0.3526	-0.392144	-0.271515	-0.281739	-0.218782	-0.351323	-0.40842	-0.651344	-0.315612	-0.224711	-0.140762	-0.245684	-0.263455	-0.223964	-0.33728	-0.140351	-0.105693	0.0345578	-0.0117366	-0.155642	-0.198451	-0.0886577	-0.245311	-0.0767455	-0.107404	0.0912805	0.0560209	0.137733	0.304652	0.159257	0.0709456	-0.172831	0.0499332	0.280103	0.179908	0.361921	0.584994	-0.0641843	0.29976	0.320146	0.159252	0.115078	-0.0223662	0.134181	0.0153376	0.538743	0.270639	-0.269075
VIT_00s0253g00170	0.179937	0.419248	-0.33232	-0.0606598	-0.112209	-0.161193	-0.237516	-0.211776	-0.517523	-0.247872	-0.242098	-0.108501	-0.15403	-0.0714089	-0.00189166	-0.241577	-0.0555262	-0.0317387	-0.0850138	-0.146565	-0.154395	-0.354739	-0.374994	-0.357188	-0.349991	-0.330816	0.240638	0.11912	0.294112	0.190956	0.0769252	-0.156408	-0.345774	-0.0579814	0.110806	-0.16884	0.245003	0.469191	-0.123474	0.295436	0.206943	0.206638	0.166868	-0.114915	-0.110197	-0.271197	0.404071	-0.121884	-0.0531578
VIT_00s0254g00030	0.235994	0.0810579	0.280542	0.204253	0.286519	0.471756	0.614529	0.572703	0.355671	0.505037	0.441568	0.36115	0.142181	0.331134	0.392556	0.495049	0.247897	0.346746	0.171144	0.317189	0.397617	0.192682	0.106073	0.232735	-0.0425439	-0.000553707	0.114716	0.0985119	0.516025	0.144154	-0.464462	-0.344733	-0.230305	-0.360664	-0.201741	-0.184396	-0.406278	-0.45317	-0.264486	-0.391792	-0.347892	-0.330105	-0.0850571	0.258209	-0.204399	0.0265496	-0.4258	-0.0935545	-0.0890649
VIT_00s0256g00010	-0.333485	-0.0770094	0.260888	-0.0250395	-0.0566252	0.350311	0.146863	0.235746	0.0714594	0.341867	0.401486	0.235104	0.171997	-0.148466	0.0698864	0.185561	0.0498509	0.245183	0.471465	0.451392	0.720349	0.665878	0.622481	0.111499	0.186812	0.129976	-0.242487	-0.0562874	0.116104	0.0804019	-0.59714	-0.332306	0.156158	0.016096	0.156816	0.454277	-0.253769	-0.21826	-0.189072	-0.340899	-0.0997344	-0.491004	-0.0926575	0.476754	0.0859108	0.506058	0.0326415	0.201867	-0.36162
VIT_00s0256g00020	-0.319179	-0.0899226	0.340031	0.0203238	0.0166255	0.434051	0.218308	0.296559	0.189228	0.419242	0.440664	0.274866	0.249571	-0.0993475	0.116708	0.259311	0.0947076	0.269811	0.474882	0.424304	0.713359	0.664144	0.632422	0.167736	0.21354	0.169929	-0.318347	-0.0986827	0.125399	0.0367556	-0.580052	-0.312178	0.190711	-0.0328504	0.113642	0.423523	-0.302647	-0.273286	-0.167119	-0.395364	-0.136328	-0.523244	-0.134572	0.471039	0.055289	0.495756	0.0439708	0.115735	-0.337927
VIT_00s0256g00030	-0.363906	-0.357008	-0.0610228	-0.147988	-0.0505158	0.0179249	-0.130129	0.0489778	0.118034	0.2251	-0.157162	-0.480486	-0.0216394	-0.449217	-0.0251073	-0.119231	-0.29778	-0.195755	0.144695	0.0248841	0.0879492	0.573138	0.330548	0.401724	0.187785	0.777675	-0.232509	-0.154491	-0.0805998	-0.153477	0.043577	0.0215773	0.359892	-0.0589168	0.363336	0.308276	-0.313511	-0.125597	0.140285	0.0854334	0.16162	-0.648428	-0.873032	-0.562438	-0.443342	-0.18662	0.275618	0.189656	-0.128302
VIT_00s0256g00040	-0.383394	-0.426893	-0.0321877	-0.119881	-0.157311	-0.0954092	-0.10733	0.0261125	0.0835425	0.204949	-0.114165	-0.454034	0.0456667	-0.433219	-0.0873726	-0.15695	-0.339894	-0.257541	0.00449465	-0.0208992	0.0673737	0.537123	0.33831	0.411996	0.222009	0.732122	-0.0880406	0.0154534	-0.01684	-0.0185477	0.0680263	0.0561151	0.402709	0.00731816	0.367836	0.298247	-0.264337	-0.155907	0.197162	0.0938989	0.201972	-0.616969	-0.802866	-0.447976	-0.365575	-0.121211	0.213025	0.15034	-0.199522
VIT_00s0256g00050	0.0730453	-0.126223	-0.177412	0.0451765	0.0285972	-0.115643	-0.137394	0.102553	0.0690773	0.0891835	-0.441387	-0.59786	-0.0486739	-0.34349	0.177376	-0.170491	-0.228175	-0.181497	-0.119572	-0.220133	-0.121127	0.193876	-0.236064	0.217968	-0.310731	0.378295	-0.136551	-0.153314	-0.00604719	-0.282672	0.106495	-0.208402	0.177952	-0.0646273	0.183276	-0.164615	-0.26778	0.031826	0.0847948	0.240857	0.121695	-0.419403	-0.747437	-0.84469	-0.749294	-0.698307	0.246712	-0.0112105	0.103974
VIT_00s0256g00080	0.0708599	-0.00576796	-0.0488967	0.179467	0.00393489	-0.102529	-0.163409	-0.143048	0.00398523	-0.0627996	-0.432586	-0.449006	-0.146086	-0.243349	0.0418158	-0.171002	-0.122441	-0.163446	0.0402427	-0.131473	-0.293147	-0.0713611	-0.255105	0.0525963	-0.187506	0.271247	-0.331365	-0.127192	-0.16971	-0.398679	0.297474	0.0451859	0.170863	0.150802	0.0570922	-0.091313	-0.0154545	0.188611	0.0920849	0.244704	0.183735	-0.13016	-0.459304	-0.588394	-0.416342	-0.484643	0.199102	-0.0294468	0.146225
VIT_00s0256g00110	-0.376498	-0.376945	-0.0669791	-0.1792	-0.0550449	0.0241693	-0.139918	0.0576154	0.116637	0.23336	-0.119447	-0.457354	-0.00689468	-0.434947	-0.040071	-0.115031	-0.300177	-0.194013	0.147545	0.0590291	0.105867	0.58534	0.359873	0.391587	0.217564	0.781961	-0.163825	-0.120073	-0.0623607	-0.104241	0.0291497	0.0302506	0.347854	-0.0771003	0.371024	0.323835	-0.318403	-0.153988	0.140386	0.0733865	0.154714	-0.64589	-0.85911	-0.538073	-0.411898	-0.158727	0.252837	0.183553	-0.140522
VIT_00s0256g00120	-0.321164	-0.231035	0.0100231	-0.234596	0.148236	0.210327	-0.0926198	0.0556977	0.23202	0.24688	0.058601	-0.18648	0.079995	-0.219482	0.00194193	0.0731337	-0.0715639	0.0127591	0.303505	0.0742471	0.143923	0.532191	0.462794	0.278438	0.397801	0.747713	-0.297931	-0.306514	-0.247778	-0.267095	-0.00981407	0.137092	0.158963	-0.176294	0.189233	0.357488	-0.316626	-0.172523	-0.0243459	-0.0737681	-0.0275996	-0.486159	-0.646811	-0.347887	-0.177827	0.0651052	0.191464	0.234117	0.0147806
VIT_00s0258g00080	0.234804	-0.0287661	-0.0498938	0.218434	0.076503	-0.104446	-0.0150825	0.148198	0.162778	0.10386	-0.432224	-0.499705	0.04752	-0.200617	0.278628	-0.0665564	-0.0822175	-0.0844686	-0.192738	-0.247578	-0.198677	0.0161658	-0.392466	0.20309	-0.373564	0.250811	-0.232504	-0.141568	-0.0364731	-0.383228	0.172599	-0.198477	0.163709	-0.00428128	-0.0090995	-0.347596	-0.256067	0.0394006	0.0376784	0.180571	0.024927	-0.292425	-0.654039	-0.785562	-0.760514	-0.767258	0.154309	0.00694326	0.158988
VIT_00s0258g00130	0.242703	0.0787486	-0.173604	0.139633	0.0207739	-0.0919085	-0.0542845	0.194242	-0.00623204	0.0958475	-0.442823	-0.505343	0.0215977	-0.2743	0.295988	-0.137945	-0.145777	-0.0879212	-0.191804	-0.189629	-0.0608323	0.0452365	-0.434222	0.118549	-0.573937	0.0514286	-0.0804417	-0.0861968	0.222782	-0.161003	-0.025305	-0.429964	0.0700223	-0.0844207	0.115995	-0.33197	-0.228381	0.11668	0.00874473	0.208408	0.094811	-0.338184	-0.562194	-0.734079	-0.820759	-0.800639	0.225167	-0.00956623	0.0450601
VIT_00s0258g00140	-0.178927	-0.269259	0.0434231	-0.0305589	0.00949164	0.0166116	0.0134406	0.170102	0.227388	0.31351	-0.096966	-0.38769	0.0825461	-0.29301	0.123429	0.00680583	-0.166992	-0.0905664	-0.0102786	0.0114234	0.0523729	0.459285	0.189397	0.449681	0.120349	0.700125	-0.155981	-0.0722275	0.0127979	-0.148095	0.0372794	-0.0325816	0.299197	-0.118301	0.187	0.0873957	-0.413833	-0.225812	0.0367592	-0.0280918	0.0046616	-0.608741	-0.873395	-0.586638	-0.547368	-0.318136	0.195817	0.201076	-0.0780778
VIT_00s0259g00010	-0.0855182	-0.0322882	-0.471393	-0.138313	-0.380118	-0.606481	-0.443067	-0.67589	-0.587586	-0.777852	-0.547077	-0.302216	-0.573003	-0.182506	-0.587822	-0.604334	-0.379725	-0.577725	-0.284636	-0.361388	-0.724512	-0.72033	-0.432346	-0.257902	-0.145556	-0.450731	0.24611	0.157428	-0.203113	0.260475	0.656874	0.479568	0.0617027	0.433083	0.200818	0.0104327	0.8511	0.638206	0.527174	0.649565	0.572162	0.744592	0.609981	0.0287015	0.494479	0.0147203	0.00738721	-0.263514	0.0459029
VIT_00s0259g00070	-0.00625936	0.343914	-0.382106	0.0117571	-0.47308	-0.515274	-0.464426	-0.528409	-0.619174	-0.522358	-0.534431	-0.288295	-0.404325	-0.279639	-0.270913	-0.501261	-0.200752	-0.321015	-0.264888	-0.184024	-0.468824	-0.538758	-0.490026	-0.432438	-0.387684	-0.490411	0.000788212	0.110515	0.0710334	0.317479	0.373403	0.0459711	0.0815469	0.436329	0.176334	-0.060307	0.651356	0.78634	0.164228	0.478841	0.487077	0.389483	0.319861	-0.0620691	0.0854479	-0.218003	0.308074	-0.097977	-0.252591
VIT_00s0259g00080	-0.0293636	-0.286715	-0.518241	-0.121095	-0.288715	-0.578858	-0.357044	-0.446109	-0.502324	-0.743639	-0.630049	-0.494094	-0.48321	-0.301015	-0.505	-0.621789	-0.527983	-0.617128	-0.27226	-0.466707	-0.480627	-0.453637	-0.403732	-0.0547936	-0.351524	-0.456047	0.273432	0.097739	-0.272876	0.0438002	0.413193	0.206842	0.121598	0.422158	0.293852	-0.00467765	0.640958	0.438023	0.572403	0.714242	0.540973	0.562875	0.479116	-0.111017	0.258853	-0.119164	-0.184898	-0.327206	0.238386
VIT_00s0259g00100	-0.18171	0.202532	-0.306168	-0.0607998	-0.501081	-0.541008	-0.474081	-0.704302	-0.601445	-0.635438	-0.425971	-0.163904	-0.452598	-0.216081	-0.492846	-0.497473	-0.200571	-0.37582	-0.200639	-0.184905	-0.565652	-0.59058	-0.281305	-0.384605	-0.0516328	-0.398971	-0.0173766	0.137849	-0.16384	0.290036	0.545298	0.395924	0.158308	0.54811	0.158795	0.134007	0.807168	0.758003	0.28483	0.456736	0.517475	0.58043	0.510256	0.19583	0.483986	0.139554	0.276855	-0.0555798	-0.210327
VIT_00s0259g00110	0.0209139	-0.354081	-0.424547	-0.0770456	-0.227826	-0.5661	-0.273755	-0.319402	-0.3289	-0.583113	-0.540205	-0.471945	-0.325168	-0.218338	-0.402995	-0.511916	-0.469425	-0.580549	-0.402688	-0.50977	-0.497019	-0.395241	-0.383266	0.0210687	-0.261503	-0.27504	0.315355	0.143332	-0.223205	0.0406646	0.426019	0.230025	0.109038	0.307319	0.203083	-0.112862	0.471919	0.260096	0.536123	0.620967	0.436922	0.429772	0.277576	-0.213744	0.130499	-0.207299	-0.252612	-0.302724	0.22638
VIT_00s0259g00120	-0.836186	-0.481288	-0.36637	-0.37067	-0.634776	-0.309031	-0.517269	-0.52018	-0.573591	-0.341014	-0.384611	-0.577951	-0.677507	-0.854127	-0.71799	-0.696737	-0.766977	-0.710251	0.297936	0.243582	-0.0650119	0.321648	0.387287	0.218131	0.110881	0.225912	-0.107736	0.0808269	0.0311818	0.554525	0.210276	0.225267	0.662971	0.471174	0.845778	0.799086	0.531285	0.408558	0.686694	0.508395	0.802327	-0.231	-0.160178	0.028308	0.27466	0.330593	0.146068	0.0211089	-0.62641
VIT_00s0259g00130	0.315586	0.457297	0.293089	0.264801	0.0851486	0.127175	0.303683	0.246508	0.174414	0.328353	0.273066	0.37924	0.394898	0.325427	0.412144	0.362464	0.451174	0.437345	-0.268948	0.0335091	0.144206	-0.0986094	-0.155337	-0.115836	-0.128874	-0.160881	-0.0511052	0.130007	0.360691	0.0602118	-0.199448	-0.253849	-0.212921	-0.176492	-0.353225	-0.337191	-0.23565	-0.042086	-0.423916	-0.374998	-0.326241	-0.0624615	0.00595008	0.155751	-0.197311	-0.129154	0.17401	0.166051	-0.0912647
VIT_00s0259g00140	-0.775804	-0.424383	-0.41059	-0.335141	-0.751627	-0.581465	-0.635568	-0.719164	-0.659076	-0.504472	-0.514189	-0.636089	-0.697821	-0.81671	-0.7988	-0.805557	-0.763366	-0.805083	0.000102681	0.0397148	-0.367381	0.0597888	0.210312	0.136711	0.140811	0.20909	-0.0204731	0.197024	-0.0701587	0.5495	0.498548	0.429092	0.673989	0.593581	0.764691	0.676691	0.678344	0.555024	0.736606	0.616848	0.865522	-0.0216558	-0.110016	-0.0641115	0.328599	0.236924	0.247209	0.000350574	-0.561265
VIT_00s0259g00150	0.504939	0.704764	0.500162	0.416068	0.264907	0.269357	0.245308	0.221632	0.328197	0.464456	0.38753	0.534934	0.608727	0.53876	0.617777	0.532514	0.735629	0.680764	-0.184428	0.110098	0.106085	-0.173026	-0.194241	-0.40882	0.00579234	-0.0231386	-0.220397	0.0417876	0.217604	-0.258041	-0.156943	-0.222272	-0.386616	-0.250214	-0.612357	-0.464701	-0.402407	-0.0889371	-0.71249	-0.552199	-0.539434	-0.0653404	-0.107474	0.0453587	-0.298226	-0.209	0.307035	0.145154	0.0703016
VIT_00s0259g00160	0.44097	0.704322	-0.0871574	0.0437853	0.193508	0.142574	-0.0154948	0.109586	-0.0782199	0.133535	0.0945791	0.276652	0.140142	0.292716	0.396563	0.168126	0.392576	0.385276	-0.128437	-0.0487783	0.0664339	-0.253303	-0.356644	-0.553832	-0.360865	-0.357112	0.0902696	-0.0814621	0.380838	0.0754793	-0.251666	-0.38834	-0.597246	-0.363449	-0.25629	-0.380983	-0.0931627	0.22702	-0.504358	-0.131988	-0.224446	0.0802011	0.158404	-0.0848972	-0.243934	-0.304433	0.196947	0.10698	0.0594528
VIT_00s0259g00170	0.659782	0.882058	0.314001	0.357821	0.370123	0.256002	0.180724	0.238459	0.265481	0.3374	0.332175	0.588446	0.500831	0.64248	0.669797	0.504757	0.792135	0.714421	-0.211053	-0.114524	0.0921357	-0.300163	-0.339079	-0.623431	-0.166076	-0.247492	-0.16803	-0.139627	0.165795	-0.347189	-0.233079	-0.316874	-0.657553	-0.361414	-0.698239	-0.598057	-0.33974	0.0309692	-0.80592	-0.468977	-0.585647	0.101638	0.122515	0.0244121	-0.266786	-0.260087	0.261035	0.155101	0.244635
VIT_00s0259g00180	0.23288	0.104153	0.199155	0.143084	0.272421	0.0573885	0.0138203	0.0270539	0.466149	0.090048	-0.0535132	0.0502021	0.256195	0.236141	0.232461	0.238673	0.344641	0.20384	-0.0897373	-0.165142	-0.244267	-0.0969267	-0.156735	-0.0274465	0.122072	0.197163	-0.392151	-0.363554	-0.522956	-0.581726	0.222592	0.180204	0.0256434	-0.0218986	-0.407245	-0.258086	-0.175261	-0.0760348	-0.195733	-0.174823	-0.324152	0.092727	-0.189939	-0.349099	-0.154723	-0.235567	-0.00429294	0.254394	0.391711
VIT_00s0259g00190	0.0397028	-0.126006	-0.298539	-0.305339	0.234611	-0.0067302	-0.0109393	0.0900278	0.0446754	0.000924913	-0.119291	-0.230315	0.0779999	-0.0130008	0.0225549	-0.0463403	-0.136168	-0.126773	-0.19737	-0.367086	-0.16952	0.00851236	-0.0743626	0.234681	0.0470959	0.305686	0.219755	-0.140362	0.00320467	-0.0719632	0.15701	0.101498	-0.215952	-0.427437	0.10252	-0.129653	-0.163511	-0.0866646	0.0780832	0.163509	-0.0193456	-0.0610799	-0.307894	-0.489651	-0.245644	-0.287405	0.0718706	-0.0874885	0.279165
VIT_00s0259g00200	-0.323554	-0.475565	-0.481437	-0.574391	0.181374	-0.0308799	-0.258594	-0.139513	-0.10982	-0.276964	-0.216708	-0.400887	-0.199067	-0.284529	-0.339693	-0.294123	-0.416811	-0.360295	0.220442	-0.324808	-0.0777643	0.256229	0.26922	0.273257	0.255767	0.386889	0.0855794	-0.415664	-0.477308	-0.240669	0.185084	0.298346	0.00105358	-0.212681	0.397203	0.331166	0.046603	-0.00408394	0.353955	0.390505	0.210463	-0.00412326	-0.167767	-0.371728	0.114638	0.099659	0.100485	0.17063	0.330218
VIT_00s0259g00210	-0.261586	-0.304629	-0.205579	-0.331058	0.0113896	-0.218162	-0.261618	-0.467892	-0.0716656	-0.454898	-0.154655	-0.0845585	-0.191796	-0.00747038	-0.502305	-0.203653	-0.153114	-0.308012	-0.0100034	-0.299642	-0.494514	-0.24175	0.132898	0.0497858	0.485439	0.186407	-0.0568497	-0.175122	-0.656222	-0.165533	0.552063	0.747254	0.0804356	0.157794	0.0475921	0.270734	0.407555	0.120164	0.323464	0.254554	0.169806	0.496468	0.272298	0.00667082	0.616838	0.357507	-0.127765	0.0534995	0.313847
VIT_00s0260g00060	-0.0855346	-0.354632	-0.186602	0.00792917	-0.296765	-0.34218	-0.0967816	-0.0340581	-0.191406	-0.177983	-0.129484	-0.258567	-0.259922	-0.197066	-0.217274	-0.312864	-0.393351	-0.355605	-0.129157	-0.186371	0.0179824	0.0946435	0.0334323	0.122059	-0.105214	-0.0102151	0.535653	0.357072	0.1408	0.179224	-0.0196051	-0.0540396	0.115858	0.191277	0.261773	0.0854619	0.100782	-0.0499948	0.314855	0.28892	0.297146	-0.0677568	0.00384162	-0.00274418	-0.00949819	-0.0115668	-0.181611	-0.264184	-0.0265155
VIT_00s0260g00070	0.0426721	-0.0734054	-0.104785	-0.371597	0.670955	0.630655	0.102417	0.28954	0.238734	0.18698	0.366456	0.289209	0.219724	0.2795	0.121294	0.292678	0.131853	0.232821	0.504583	0.0584783	0.364429	0.280369	0.326983	-0.109805	0.223702	0.0870269	-0.0219928	-0.501695	-0.118657	-0.212445	-0.365543	-0.0650753	-0.500912	-0.636727	-0.0248464	0.13223	-0.274973	-0.356595	-0.173069	-0.16126	-0.29632	-0.0467287	0.139305	0.0869382	0.154719	0.285137	-0.283463	0.0169228	0.389769
VIT_00s0260g00080	-0.772602	-0.459606	-0.0957989	-0.386141	-0.493505	-0.177494	-0.263167	-0.27753	-0.213489	0.00824348	0.0831486	-0.188157	-0.264401	-0.499261	-0.50502	-0.300738	-0.430451	-0.377425	0.154627	0.377374	0.0848673	0.471098	0.611766	0.304317	0.47616	0.457937	0.102717	0.209222	0.0717085	0.644233	0.0910762	0.298176	0.546992	0.221354	0.558418	0.706229	0.193104	0.0294711	0.378411	0.0795614	0.392228	-0.342529	-0.271467	0.173964	0.325051	0.490932	0.0749993	0.215304	-0.641122
VIT_00s0261g00010	0.302597	0.133307	-0.203015	0.235802	-0.299705	-0.680358	-0.270344	-0.538531	-0.333301	-0.657514	-0.559588	-0.234647	-0.290849	0.0641352	-0.276573	-0.38459	-0.0925023	-0.340865	-0.585053	-0.498192	-0.825825	-0.907162	-0.728076	-0.302371	-0.281448	-0.484101	0.206826	0.29657	-0.265516	-0.0681347	0.709503	0.395621	0.0189735	0.512575	-0.178475	-0.388619	0.629885	0.51374	0.268961	0.475056	0.304378	0.79391	0.487734	-0.139779	0.208767	-0.331211	-0.0095003	-0.241475	0.275458
VIT_00s0261g00020	-0.488267	-0.247363	-0.303361	-0.272787	-0.404331	-0.41527	-0.568896	-0.718736	-0.473211	-0.511034	-0.417754	-0.434411	-0.386199	-0.44513	-0.615231	-0.529439	-0.414361	-0.501633	0.0755286	-0.146188	-0.504883	-0.157031	0.122074	-0.0352367	0.335463	0.276827	-0.0739603	0.0467728	-0.430426	0.0814656	0.646866	0.631001	0.393784	0.47048	0.40185	0.469704	0.55449	0.483663	0.419721	0.48035	0.553778	0.242364	-0.0454633	-0.123728	0.377456	0.19728	0.359576	0.0894243	-0.133532
VIT_00s0261g00040	-0.505182	-0.250062	-0.558571	-0.277679	-0.652286	-0.619042	-0.594986	-0.758585	-0.815526	-0.762141	-0.671862	-0.617408	-0.750307	-0.670526	-0.788339	-0.826565	-0.715822	-0.764967	-0.0192425	-0.149758	-0.515499	-0.31494	-0.116393	-0.0208786	-0.123789	-0.183555	0.131704	0.219216	-0.0850086	0.439458	0.558723	0.396788	0.41599	0.61151	0.664788	0.45994	0.867698	0.737351	0.699172	0.779548	0.887909	0.368139	0.26806	-0.016468	0.408659	0.119141	0.277331	-0.10201	-0.308424
VIT_00s0262g00110	-0.0493949	-0.0924976	0.0419525	0.0661613	0.0197924	0.279365	0.224243	0.426671	0.145117	0.412529	0.00301431	-0.228191	0.0250596	-0.26257	0.280204	0.120312	-0.109813	0.0755515	0.299022	0.332679	0.403883	0.531907	0.11866	0.349038	-0.232661	0.263947	-0.129231	-0.0680574	0.36944	0.0921285	-0.418887	-0.501722	0.173211	-0.146954	0.198491	0.0464969	-0.410771	-0.221234	-0.108702	-0.118932	-0.0466346	-0.688711	-0.61192	-0.295197	-0.597788	-0.294436	-0.0879795	0.0831039	-0.304429
VIT_00s0262g00120	0.0753451	-0.12973	-0.0972365	0.0614232	0.0939849	0.248565	0.300755	0.537754	0.0763917	0.291989	-0.146442	-0.325418	-0.0302566	-0.292945	0.310422	0.0496892	-0.207678	0.0151043	0.168421	0.200331	0.451302	0.435195	-0.0745361	0.432819	-0.564802	-0.0240746	-0.0558171	-0.0922859	0.452062	0.0440853	-0.511548	-0.688575	0.089739	-0.20057	0.254388	-0.0953871	-0.384674	-0.193166	0.0286727	0.0216597	0.00326515	-0.56782	-0.433981	-0.319462	-0.682189	-0.442782	-0.141707	-0.0968744	-0.141169
VIT_00s0264g00010	-0.160097	-0.13532	-0.457539	-0.254818	-0.11458	-0.316928	-0.461432	-0.530579	-0.393186	-0.481577	-0.489476	-0.462181	-0.484583	-0.273361	-0.438786	-0.483306	-0.397733	-0.493767	-0.0436329	-0.355574	-0.580091	-0.337592	-0.197563	-0.0624057	0.0190986	0.143421	0.117139	-0.0168908	-0.188744	0.00159004	0.587472	0.459719	-0.00437879	0.108919	0.316906	0.13544	0.444281	0.411177	0.386214	0.56382	0.468334	0.312711	-0.0093734	-0.397983	0.135991	-0.161239	0.163103	-0.0523092	0.187925
VIT_00s0264g00020	0.400924	0.544675	0.474386	0.287097	0.28868	0.410324	0.485564	0.406997	0.41256	0.576751	0.591049	0.648321	0.522876	0.613174	0.592948	0.68806	0.714119	0.705371	-0.0164656	0.243691	0.20125	-0.0267761	-0.00178786	-0.135198	0.181779	0.081529	0.0137873	0.09935	0.334632	0.00937059	-0.255272	-0.169717	-0.375937	-0.369001	-0.587915	-0.389823	-0.458428	-0.296175	-0.717978	-0.647953	-0.630923	-0.152619	-0.119099	0.228264	-0.184694	-0.0224221	0.00972057	0.21179	-0.0850145
VIT_00s0264g00030	-0.647688	-0.297471	-0.223317	-0.447345	-0.309906	-0.207436	-0.268545	-0.531974	-0.38429	-0.351293	0.00279234	-0.0541901	-0.368893	-0.254612	-0.654339	-0.328324	-0.340904	-0.398435	0.101001	0.00693025	-0.260769	-0.026812	0.433497	0.130992	0.587138	0.249953	0.0468721	0.0706069	-0.190168	0.400545	0.42682	0.66946	0.233712	0.177309	0.396202	0.592535	0.498143	0.238302	0.428586	0.245092	0.409045	0.220056	0.198177	0.345675	0.716132	0.644333	0.182791	0.00946583	-0.288821
VIT_00s0264g00040	0.418087	0.138898	0.324542	0.303813	0.343339	0.44414	0.727761	0.806808	0.484897	0.660783	0.394233	0.274597	0.445679	0.336025	0.671726	0.584523	0.342133	0.482509	-0.0317514	0.229794	0.487783	0.279803	-0.0547315	0.361898	-0.261973	0.0261212	0.129208	0.0899162	0.582378	-0.000963944	-0.571027	-0.609005	-0.243227	-0.472674	-0.301199	-0.455377	-0.679349	-0.531195	-0.396302	-0.46194	-0.502021	-0.499096	-0.345958	-0.0052743	-0.614352	-0.318968	-0.292367	-0.0517468	-0.0386163
VIT_00s0264g00050	-0.0782748	0.258379	-0.212336	0.0326766	-0.556658	-0.440768	-0.248675	-0.387492	-0.655759	-0.41021	-0.141177	0.0273489	-0.293114	-0.15966	-0.326853	-0.389078	-0.18618	-0.198021	-0.200786	0.0348204	-0.0855975	-0.367265	-0.170149	-0.376787	-0.269069	-0.590001	0.387281	0.491276	0.355251	0.571374	0.00825534	-0.0567357	-0.0491538	0.407469	0.202501	0.12317	0.5693	0.52065	0.0962432	0.271373	0.42874	0.357305	0.597977	0.465517	0.384957	0.207029	0.155579	-0.0165259	-0.365602
VIT_00s0264g00060	0.207262	0.332337	0.802881	0.587002	0.0157073	0.306787	0.53864	0.517005	0.596583	0.856151	0.623597	0.517855	0.577579	0.361311	0.646145	0.642662	0.591595	0.613453	-0.146206	0.492687	0.442817	0.349952	0.204442	0.0691799	0.142742	0.322551	-0.205033	0.30434	0.510046	0.0282293	-0.425681	-0.364469	0.0711729	-0.126346	-0.472721	-0.248029	-0.673119	-0.482412	-0.579106	-0.79313	-0.531336	-0.635664	-0.505534	0.213249	-0.440655	-0.0406635	0.052789	0.134681	-0.364926
VIT_00s0264g00090	0.14445	0.264752	0.28825	0.0847377	0.267637	0.206149	0.0947865	-0.0397153	0.315334	0.107261	0.215378	0.34916	0.265303	0.361421	0.187069	0.364868	0.497501	0.396108	0.123085	-0.0542934	-0.101916	-0.0884934	0.085842	-0.129187	0.373631	0.174336	-0.354437	-0.274976	-0.456316	-0.463401	0.131204	0.261082	-0.12355	-0.0502966	-0.436622	-0.0852003	-0.113766	-0.0474647	-0.372911	-0.320941	-0.393552	0.168954	0.0222551	0.0722005	0.153553	0.159194	0.196781	0.16737	0.266631
VIT_00s0264g00100	-0.36358	0.139706	-0.1991	-0.372316	-0.0845343	0.049684	-0.410147	-0.447082	-0.349453	-0.334601	-0.0188193	0.113192	-0.22706	-0.159945	-0.369913	-0.202462	-0.0267539	-0.0360084	0.393619	0.117664	0.0175051	-0.00856281	0.274945	-0.358397	0.230482	-0.171801	-0.307184	-0.342056	-0.391323	0.0494436	0.0429367	0.235883	0.0028967	0.162291	0.189342	0.490916	0.427306	0.40818	0.00773786	0.110845	0.183128	0.298047	0.442207	0.333086	0.60289	0.53929	0.274886	0.247492	-0.0889494
VIT_00s0264g00120	0.531425	0.290664	0.596685	0.57227	0.138068	0.151571	0.550656	0.607468	0.566325	0.631117	0.469671	0.452392	0.636097	0.505361	0.698933	0.579298	0.558314	0.570567	-0.361669	0.147677	0.359956	0.112159	-0.133011	0.00660716	-0.149138	-0.0455965	0.119629	0.283939	0.373343	-0.129117	-0.42502	-0.482859	-0.12457	-0.162517	-0.592191	-0.565422	-0.642302	-0.498801	-0.53727	-0.617929	-0.602797	-0.33203	-0.220365	0.0986313	-0.498913	-0.276059	-0.193042	0.0578813	-0.00316444
VIT_00s0264g00130	0.196629	0.189251	0.298263	0.225062	0.157525	0.263831	0.353048	0.232453	0.165968	0.0581732	0.292692	0.478952	0.227774	0.329286	0.182393	0.340983	0.354574	0.382522	0.184709	0.207198	0.339254	-0.054757	0.0443329	-0.073963	-0.0775721	-0.480864	-0.15814	-0.0479032	-0.0802999	-0.16947	-0.341878	-0.204351	-0.121021	0.0824036	-0.316871	-0.0819087	-0.00687378	-0.093027	-0.223028	-0.303545	-0.2924	0.226389	0.542861	0.619819	0.276361	0.323903	-0.202371	0.0122931	0.0852476
VIT_00s0265g00010	0.353359	0.386877	0.167505	0.0139227	0.59342	0.41412	0.142401	0.192996	0.417991	0.229766	0.227344	0.348825	0.391764	0.469412	0.422619	0.448025	0.55807	0.503008	0.130848	-0.101937	0.0305006	-0.0410531	-0.0433845	-0.22675	0.140281	0.1389	-0.369876	-0.515881	-0.311327	-0.623905	-0.0750753	0.0190238	-0.466057	-0.453574	-0.482019	-0.281587	-0.343488	-0.146301	-0.493007	-0.33223	-0.526632	0.0826772	-0.035689	-0.17446	-0.102092	-0.0845082	0.142032	0.302925	0.487723
VIT_00s0265g00020	-0.199532	-0.210283	0.295362	-0.0561226	0.258234	0.52318	0.283812	0.54396	0.455313	0.716954	0.430715	0.0547458	0.379922	-0.082014	0.360945	0.375671	0.0833394	0.285826	0.341775	0.370954	0.640636	0.856825	0.580961	0.401386	0.262391	0.6923	-0.210734	-0.161741	0.241842	-0.0799723	-0.512538	-0.339653	0.106398	-0.428676	0.103874	0.212161	-0.742067	-0.56353	-0.233487	-0.437136	-0.302726	-0.88517	-0.799895	-0.154727	-0.477146	0.0358239	0.0483931	0.196781	-0.197462
VIT_00s0265g00030	0.50006	0.357341	0.127719	0.0945276	0.452481	0.33621	0.403478	0.40605	0.227569	0.242545	0.407283	0.512503	0.419396	0.612552	0.437306	0.494725	0.471155	0.490129	-0.061494	-0.056868	0.192719	-0.17436	-0.136625	-0.144895	-0.0284988	-0.255215	0.281369	-0.00326902	0.193639	-0.101782	-0.288005	-0.214872	-0.61528	-0.46415	-0.460363	-0.446234	-0.305178	-0.266782	-0.501237	-0.337676	-0.514147	0.155098	0.275736	0.231842	-0.0399971	-0.0205919	-0.185239	-0.10549	0.29843
VIT_00s0265g00040	0.263017	0.5996	0.314784	0.229899	0.0134123	0.0796833	0.123495	-0.0465509	0.0471604	0.0874122	0.296388	0.542351	0.297767	0.421806	0.246748	0.316376	0.562582	0.471771	-0.085901	0.0248486	0.00462665	-0.296387	-0.100979	-0.424059	0.0981279	-0.29953	-0.141712	0.0324189	-0.00473952	-0.064097	-0.0617564	-0.0168889	-0.236178	0.0450297	-0.470455	-0.212117	0.0205466	0.136852	-0.520083	-0.388196	-0.338539	0.261018	0.349216	0.414733	0.196581	0.170248	0.259472	0.220432	-0.0347926
VIT_00s0265g00050	-0.469446	-0.127899	-0.0207646	-0.375089	0.197213	0.449133	-0.170348	-0.105589	0.0623206	0.0734051	0.09477	-0.00836911	-0.14884	-0.235309	-0.172353	0.0199329	-0.0542652	0.0096328	0.739174	0.302626	0.194355	0.442229	0.529163	0.0680287	0.413615	0.413441	-0.620952	-0.607042	-0.380191	-0.188409	-0.0780568	0.181363	0.134907	-0.128148	0.240257	0.556767	-0.0298259	-0.0223865	0.0241956	-0.0863025	0.00629137	-0.232494	-0.187688	0.00920194	0.228393	0.414578	0.109885	0.209133	-0.0910973
VIT_00s0265g00060	-0.462577	-0.0307262	-0.323886	-0.336381	-0.3375	-0.144812	-0.172088	-0.370729	-0.514503	-0.279277	-0.173535	-0.186729	-0.357278	-0.377126	-0.432763	-0.330291	-0.334488	-0.31621	0.111453	0.113639	-0.157207	-0.0346111	0.151001	0.129509	0.120715	0.00368766	-0.0388915	0.00626571	0.108238	0.495977	0.194384	0.234046	0.179109	0.133765	0.434799	0.399107	0.436975	0.404467	0.266394	0.286362	0.428192	0.0569178	0.10495	0.169123	0.3244	0.301535	0.315387	0.0646432	-0.433803
VIT_00s0265g00070	0.0128757	-0.235002	-0.465029	-0.397188	0.257511	-0.00329184	-0.308138	-0.195588	-0.146491	-0.415864	-0.404368	-0.347868	-0.276819	-0.130921	-0.245696	-0.276882	-0.282023	-0.316608	0.135322	-0.29546	-0.333996	-0.224791	-0.250517	-0.0485383	-0.121094	-0.138281	-0.00213231	-0.422528	-0.436783	-0.189984	0.268271	0.190189	-0.0941767	-0.133035	0.173327	-0.0173924	0.227983	0.106893	0.278616	0.403213	0.131651	0.360841	0.159169	-0.418873	0.0746145	-0.205208	-0.165726	-0.166471	0.417748
VIT_00s0265g00080	0.299242	0.100782	0.338835	0.609263	-0.129681	-0.102058	0.161697	0.110673	0.19474	0.203623	-0.215101	-0.209979	0.0528289	-0.0432971	0.300877	0.0730683	0.0927277	0.0628309	-0.164118	0.0195004	-0.115742	-0.0890821	-0.329701	0.102191	-0.325759	0.104394	-0.167187	0.281866	0.173372	-0.2725	0.0811556	-0.209805	0.255548	0.303647	-0.182343	-0.321117	-0.190734	-0.0164099	-0.0777554	-0.0445854	0.00478849	-0.243676	-0.443491	-0.309604	-0.573328	-0.531494	0.0693039	-0.139318	-0.0102364
VIT_00s0265g00090	0.0302398	-0.197425	0.223434	0.0192349	0.254954	0.121735	0.109059	0.0597689	0.505838	0.0535854	0.221185	0.268973	0.0961496	0.338558	-0.0174056	0.24621	0.20899	0.0548544	0.0196075	-0.158257	-0.108843	-0.00959304	0.161012	0.0312122	0.397691	0.129669	-0.192908	-0.279087	-0.478069	-0.33186	0.127725	0.341013	0.0447228	-0.0279624	-0.322303	-0.023457	-0.0511535	-0.305129	0.053476	-0.208336	-0.272041	0.167499	0.164218	0.144245	0.313221	0.277235	-0.427367	-0.0515366	0.312944
VIT_00s0265g00100	-0.39976	-0.555864	-0.0576822	-0.087573	-0.182952	-0.0412184	0.0688402	-0.00495348	0.0118599	-0.0133244	-0.10349	-0.298539	-0.27009	-0.320508	-0.33062	-0.185523	-0.45736	-0.431569	0.101506	0.168414	-0.0187341	0.231255	0.248884	0.463612	0.104184	0.241018	0.0137193	0.14875	0.103407	0.298276	0.109941	0.179614	0.478027	0.17718	0.393832	0.342851	0.137542	-0.118413	0.547642	0.203735	0.354052	-0.210142	-0.177327	0.0576331	0.0901188	0.156791	-0.343227	-0.282001	-0.23955
VIT_00s0265g00110	-0.647661	-0.587141	0.0677473	-0.191099	-0.261563	-0.0725742	-0.0839926	-0.185437	0.0325162	0.0292102	0.0368853	-0.228377	-0.166819	-0.370885	-0.411565	-0.162216	-0.363275	-0.355586	0.228342	0.165551	-0.0171448	0.426759	0.574211	0.484389	0.568045	0.639261	-0.198875	0.0301615	-0.23967	0.136931	0.249834	0.459204	0.597252	0.244885	0.366665	0.581481	0.0725217	-0.135931	0.419657	0.0605764	0.267349	-0.310448	-0.385791	0.0813641	0.24505	0.416307	-0.0376169	0.145744	-0.34175
VIT_00s0265g00120	-0.050435	0.0439848	-0.467282	-0.207304	-0.0608648	-0.24684	-0.347848	-0.467323	-0.423659	-0.634442	-0.487111	-0.259663	-0.398337	-0.142325	-0.400884	-0.379107	-0.246504	-0.355566	0.0581557	-0.319156	-0.494927	-0.491831	-0.311296	-0.220283	-0.143347	-0.369028	-0.0838369	-0.229866	-0.350228	-0.0197011	0.438242	0.330193	-0.0135498	0.253464	0.156559	0.0649262	0.641215	0.567874	0.311231	0.524023	0.383925	0.583705	0.486489	-0.0313455	0.361912	0.0135403	0.0609632	-0.0874076	0.174094
VIT_00s0265g00130	0.00887685	0.189641	0.575306	0.185475	0.171617	0.444442	0.301387	0.417259	0.515009	0.736215	0.596542	0.436408	0.519033	0.234947	0.499968	0.536627	0.48478	0.54922	0.141895	0.450116	0.509145	0.533497	0.406936	0.0635977	0.31229	0.43999	-0.298808	-0.0622169	0.189523	-0.0972999	-0.416047	-0.262293	0.0235065	-0.286215	-0.285805	-0.0117807	-0.648622	-0.450113	-0.506666	-0.688142	-0.519713	-0.601201	-0.506023	0.117558	-0.30523	0.114125	0.138821	0.237704	-0.237558
VIT_00s0265g00170	0.294161	0.171717	0.072101	-0.0430964	0.466091	0.241036	0.114861	0.00544344	0.265281	-0.0891825	0.12932	0.325116	0.279917	0.485669	0.117979	0.326582	0.395702	0.288322	0.0659259	-0.226889	-0.216913	-0.33434	-0.114478	-0.140452	0.236914	-0.0800584	-0.137217	-0.314203	-0.455571	-0.459303	0.174863	0.298565	-0.373281	-0.208222	-0.440559	-0.233197	-0.0206741	-0.101072	-0.259555	-0.16231	-0.38365	0.463288	0.318524	0.0565317	0.262196	0.0841604	-0.149065	-0.062652	0.537677
VIT_00s0266g00010	0.167081	0.124856	-0.0172897	0.0557887	-0.00701304	-0.175494	0.007644	-0.244156	-0.118261	-0.343645	-0.101424	0.135449	0.0797284	0.213453	-0.127107	-0.00331579	0.141376	0.0208318	-0.184019	-0.225197	-0.325103	-0.493224	-0.243588	-0.105205	0.0466696	-0.345715	0.0355102	0.0593259	-0.303345	-0.127051	0.306908	0.287093	-0.104837	0.210416	-0.222156	-0.153087	0.330671	0.208983	-0.0124281	0.0842695	-0.0225953	0.572865	0.487088	0.223784	0.353186	0.0995218	-0.0343114	-0.0809462	0.248818
VIT_00s0267g00030	-0.424855	-0.264062	-0.555562	-0.392109	-0.339675	-0.354973	-0.330967	-0.533361	-0.607123	-0.651824	-0.518346	-0.467411	-0.60527	-0.47152	-0.675322	-0.564202	-0.575764	-0.596535	0.119507	-0.111621	-0.437158	-0.275432	-0.0544364	0.136424	-0.0133549	-0.130213	0.0632377	-0.00261405	-0.175175	0.331858	0.453319	0.432811	0.23258	0.345125	0.532313	0.406623	0.715993	0.524326	0.582052	0.627584	0.650893	0.387758	0.31109	0.0084302	0.453125	0.183957	0.0509157	0.0482459	-0.155162
VIT_00s0268g00020	0.352483	0.379869	0.183987	0.131934	0.342607	0.241626	0.196457	0.270802	0.239807	0.301067	0.25057	0.28891	0.450816	0.358525	0.467294	0.376906	0.455792	0.459116	-0.0681785	-0.123371	0.147833	0.0292516	-0.0603217	-0.141871	0.0276067	0.115359	-0.107911	-0.165385	0.00486271	-0.361958	-0.18103	-0.191618	-0.422764	-0.37409	-0.401314	-0.35406	-0.412175	-0.146237	-0.533222	-0.302713	-0.4484	-0.113384	-0.183466	-0.110987	-0.282987	-0.181182	0.205478	0.0114019	0.215146
VIT_00s0269g00010	0.44776	0.155367	0.211082	0.327958	0.0383997	-0.235042	0.0646471	-0.0729795	0.15175	-0.171412	0.069401	0.296501	0.282615	0.477544	0.0982891	0.133881	0.324417	0.154444	-0.399059	-0.311091	-0.276729	-0.511626	-0.357183	-0.367284	-0.0190463	-0.384136	0.225338	0.206135	-0.262875	-0.253371	0.17372	0.137562	-0.198486	0.187638	-0.520158	-0.442843	0.0885948	-0.0555333	-0.180046	-0.0956717	-0.242911	0.528555	0.477128	0.182031	0.214106	-0.0374928	-0.163437	-0.224764	0.371714
VIT_00s0269g00020	0.330814	0.330098	0.628664	0.59629	-0.0340858	0.249379	0.460373	0.52811	0.335117	0.616536	0.52116	0.521316	0.443582	0.324297	0.564611	0.461623	0.444453	0.516109	-0.115616	0.429734	0.585003	0.211	0.0190054	-0.170282	-0.245186	-0.270852	0.0236056	0.378648	0.633319	0.17681	-0.647176	-0.658572	-0.0468204	-0.0263116	-0.373356	-0.305017	-0.448828	-0.359456	-0.462649	-0.596683	-0.391011	-0.400707	-0.0126397	0.45548	-0.317896	-0.0155576	-0.125721	-0.146489	-0.323459
VIT_00s0269g00030	0.115455	0.0511257	0.152361	-0.0389992	0.326964	0.417701	0.262431	0.376746	0.25382	0.427407	0.383696	0.236827	0.23777	0.205429	0.342081	0.374511	0.24394	0.368752	0.224551	0.103931	0.379079	0.345931	0.23941	0.0690893	0.12586	0.25066	0.0481917	-0.0984736	0.182081	-0.0633579	-0.403473	-0.263544	-0.303474	-0.422143	-0.139785	-0.0582521	-0.490665	-0.408354	-0.398063	-0.344001	-0.391542	-0.355866	-0.273447	-0.0158643	-0.222135	0.0201897	-0.148368	0.0663713	0.056387
VIT_00s0269g00040	0.317739	0.0765288	0.192147	0.0903076	0.50163	0.332189	0.198242	0.315799	0.527865	0.332017	0.184524	0.124377	0.354314	0.336715	0.416832	0.399532	0.353454	0.346384	0.0994133	-0.177879	0.0605133	0.170883	0.0205008	0.0111029	0.154442	0.399906	-0.198836	-0.350822	-0.247866	-0.622492	-0.0999613	-0.0413935	-0.291216	-0.391403	-0.376226	-0.260683	-0.524852	-0.381971	-0.380411	-0.283034	-0.467907	-0.204338	-0.396787	-0.387786	-0.346014	-0.240777	-0.106779	0.114364	0.466257
VIT_00s0269g00050	0.017095	-0.00891936	-0.106505	-0.231865	0.448089	0.555372	0.151267	0.354482	0.0798874	0.161248	0.224384	0.171386	0.0160688	0.0621606	0.139283	0.185715	0.0251368	0.204644	0.51549	0.174621	0.544963	0.34891	0.250462	-0.0413927	-0.154226	-0.166039	-0.0595458	-0.361269	0.131733	-0.0717478	-0.56865	-0.383899	-0.329617	-0.430468	0.12552	0.161413	-0.208432	-0.202084	-0.0988602	-0.093701	-0.142955	-0.148364	0.184553	0.188928	0.0233001	0.196383	-0.154023	-0.0752761	0.155992
VIT_00s0269g00080	-0.0526385	-0.0395149	-0.459052	-0.369939	-0.0853209	-0.278726	-0.284047	-0.292769	-0.408804	-0.490435	-0.166499	-0.0382966	-0.196999	-0.0267758	-0.351174	-0.311651	-0.217088	-0.241838	-0.195949	-0.290664	-0.201294	-0.307421	-0.133795	-0.227293	-0.0719572	-0.416101	0.387306	-0.00465074	-0.131226	0.270263	0.125128	0.167069	-0.222983	0.0147835	0.156447	0.0629177	0.433968	0.258297	0.186144	0.339706	0.204468	0.514399	0.593162	0.133924	0.445689	0.177192	-0.128802	0.00692342	0.142613
VIT_00s0269g00100	0.162915	-0.00207332	-0.464691	0.0117836	-0.221612	-0.567458	-0.332839	-0.461078	-0.427836	-0.634251	-0.74826	-0.560944	-0.441345	-0.212588	-0.293823	-0.505624	-0.33381	-0.494546	-0.360636	-0.504945	-0.79745	-0.685126	-0.68504	-0.0527139	-0.367326	-0.246253	0.15256	0.0787565	-0.195837	-0.051874	0.706433	0.307088	0.071497	0.328706	0.111484	-0.29491	0.553375	0.570844	0.405444	0.672767	0.444537	0.534612	0.130691	-0.486808	-0.0700468	-0.526172	0.137174	-0.213664	0.216117
VIT_00s0269g00120	0.164863	-0.0107248	-0.304119	0.109658	-0.1562	-0.481942	-0.251887	-0.339274	-0.243897	-0.410602	-0.65738	-0.554456	-0.260029	-0.194332	-0.143248	-0.373466	-0.252213	-0.398117	-0.379635	-0.497172	-0.706976	-0.503562	-0.585351	0.02443	-0.275198	0.00665985	0.020516	0.0587911	-0.175366	-0.170649	0.657778	0.261851	0.135239	0.258681	0.0522871	-0.31239	0.319054	0.419588	0.287322	0.528169	0.337496	0.279751	-0.176251	-0.596398	-0.274131	-0.589373	0.209852	-0.209938	0.198464
VIT_00s0269g00130	-0.138463	-0.262143	-0.410255	-0.1011	-0.302217	-0.601377	-0.405946	-0.578113	-0.347725	-0.581889	-0.684296	-0.642287	-0.500417	-0.339008	-0.48297	-0.550648	-0.466247	-0.637526	-0.316654	-0.526589	-0.845787	-0.474363	-0.372036	0.127465	-0.00298221	0.181415	0.0807484	0.0884984	-0.33164	-0.0357833	0.849506	0.590678	0.285873	0.374928	0.244674	-0.0164184	0.519113	0.446998	0.548527	0.656159	0.528297	0.362845	-0.121374	-0.520934	0.0507624	-0.31928	0.15062	-0.145817	0.130511
VIT_00s0269g00140	-0.170237	-0.188099	-0.49669	-0.278421	-0.0337974	-0.0897996	-0.319625	-0.206245	-0.284743	-0.273506	-0.553461	-0.641602	-0.493827	-0.471882	-0.209335	-0.3958	-0.440603	-0.404846	0.254279	-0.174963	-0.25595	0.0622653	-0.142926	0.168042	-0.203423	0.215331	-0.130776	-0.31606	-0.173876	-0.092224	0.259877	0.0439102	0.149738	0.0367361	0.422443	0.140323	0.174559	0.313171	0.323187	0.526335	0.374219	-0.108403	-0.357238	-0.610563	-0.277544	-0.356443	0.0989849	-0.17486	0.0427043
VIT_00s0269g00150	-0.406646	-0.21145	-0.429906	-0.207776	-0.36924	-0.27853	-0.371666	-0.254192	-0.458133	-0.259701	-0.600893	-0.728853	-0.420454	-0.746218	-0.290964	-0.537984	-0.575273	-0.485057	0.0933587	-0.0114417	-0.0981587	0.207224	-0.0276086	0.229479	-0.280759	0.174249	-0.248887	-0.118794	0.00341999	0.130129	0.157212	-0.087571	0.432104	0.277482	0.609554	0.318043	0.238008	0.447569	0.399279	0.52389	0.574052	-0.285479	-0.41228	-0.445067	-0.291464	-0.259734	0.346623	-0.0819717	-0.321809
VIT_00s0269g00180	0.136446	-0.0744066	-0.326777	0.0627131	-0.103266	-0.399092	-0.220984	-0.227152	-0.185355	-0.302905	-0.639643	-0.616971	-0.282174	-0.252583	-0.0867706	-0.353514	-0.300707	-0.400794	-0.319538	-0.441609	-0.603974	-0.344633	-0.519089	0.130105	-0.302252	0.121108	0.0346482	0.00914521	-0.0958504	-0.165599	0.556618	0.16301	0.139458	0.144711	0.126184	-0.289157	0.189848	0.333281	0.301486	0.511768	0.321038	0.103525	-0.340489	-0.702429	-0.414461	-0.654555	0.212267	-0.158084	0.176851
VIT_00s0270g00030	-0.216368	-0.212381	-0.244839	-0.0806812	-0.313284	-0.216663	-0.0535387	-0.201828	-0.359143	-0.283484	-0.241529	-0.26868	-0.391144	-0.265838	-0.358008	-0.270583	-0.380986	-0.359683	0.0660253	0.0296701	-0.19403	-0.125982	-0.0282414	0.191839	-0.0695533	-0.0963418	0.27906	0.290636	0.156182	0.411438	0.198336	0.156219	0.243509	0.300335	0.333217	0.205808	0.387395	0.238625	0.356473	0.343908	0.418808	0.111871	0.128452	0.129785	0.18396	0.0825968	-0.0609165	-0.118137	-0.261649
VIT_00s0270g00050	0.0131763	0.0749199	0.766234	0.758904	-0.442858	-0.184195	0.283926	0.0037299	0.251716	0.282105	0.262034	0.308629	0.178524	0.131545	0.1075	0.194714	0.244088	0.14476	-0.241938	0.376534	0.0920737	-0.019982	0.0923433	0.0117755	0.102641	-0.0358567	-0.21	0.594601	0.207483	0.056799	-0.0274214	-0.0137632	0.484666	0.614621	-0.308197	-0.0299426	-0.0220186	-0.134508	-0.0691375	-0.401558	-0.0418335	-0.150188	0.0160531	0.554197	0.0696537	0.222123	-0.0625937	-0.113476	-0.380511
VIT_00s0270g00100	-0.0749661	0.0866396	0.537366	0.246377	-0.0774121	0.239612	0.358971	0.147437	0.163247	0.273563	0.626417	0.665113	0.251343	0.331553	0.0537206	0.369274	0.325463	0.347645	0.13534	0.460354	0.418311	0.106056	0.390894	-0.0614313	0.309474	-0.21471	0.0148262	0.315535	0.228454	0.253091	-0.349819	-0.0381748	0.0302119	0.114533	-0.238093	0.157032	-0.0484636	-0.281956	-0.206573	-0.516515	-0.242732	0.0132456	0.431929	0.923391	0.473737	0.66971	-0.156196	0.0380586	-0.30105
VIT_00s0270g00110	0.261893	0.148185	0.231385	0.147004	0.384209	0.44335	0.32073	0.579606	0.448902	0.642746	0.23686	0.048743	0.301393	0.139826	0.613125	0.438682	0.280686	0.407142	0.104233	0.133628	0.373481	0.429116	0.0465724	0.186406	-0.104202	0.420129	-0.138898	-0.175372	0.295398	-0.231345	-0.393638	-0.452913	-0.167516	-0.496987	-0.19068	-0.275604	-0.737914	-0.432015	-0.439877	-0.387118	-0.449083	-0.639339	-0.716486	-0.433759	-0.742249	-0.434145	0.0423039	0.0817443	0.0307018
VIT_00s0270g00120	0.716703	0.452152	0.50286	0.448688	0.573504	0.540092	0.579771	0.732348	0.674997	0.631647	0.497082	0.592581	0.608934	0.695986	0.836667	0.746371	0.724667	0.743598	-0.0386903	0.117696	0.392393	0.0102915	-0.232481	-0.123628	-0.228282	-0.181391	-0.0692902	-0.117033	0.26845	-0.37539	-0.528158	-0.540612	-0.496509	-0.502606	-0.720594	-0.665618	-0.694522	-0.54301	-0.677653	-0.670919	-0.798235	-0.175528	-0.0494687	0.0196452	-0.484255	-0.333758	-0.372892	-0.012846	0.291233
VIT_00s0270g00130	0.321476	0.282643	0.101556	0.1502	0.250838	0.355867	0.289439	0.474101	0.0907882	0.220479	0.177273	0.267618	0.243126	0.15523	0.422822	0.268341	0.255156	0.389631	0.190032	0.220955	0.55559	0.159841	-0.105709	-0.100836	-0.470816	-0.52127	-0.108054	-0.189309	0.230128	-0.0942416	-0.640905	-0.688325	-0.262569	-0.202693	-0.16747	-0.237122	-0.251096	-0.0995484	-0.323364	-0.228799	-0.298902	-0.109513	0.252406	0.234841	-0.234981	-0.0772638	-0.132276	-0.0498821	0.0246509
VIT_00s0271g00030	0.0960993	-0.0318793	-0.0309026	0.0291197	0.0232407	-0.0518878	0.244158	-0.0264694	-0.062355	-0.246505	-0.0537293	0.102683	0.075566	0.133389	-0.111947	0.0421987	0.0399941	0.000835354	-0.0338298	-0.00885723	-0.114797	-0.309126	-0.137834	0.184276	-0.0346873	-0.357517	0.0566147	0.0564437	-0.163855	-0.036636	0.111362	0.135648	-0.0362788	0.14423	-0.104189	-0.0742982	0.25403	0.0860426	0.0867558	0.0749827	0.00400117	0.410828	0.452723	0.294377	0.300398	0.145256	-0.237528	-0.063404	0.151632
VIT_00s0271g00040	-0.211326	-0.118205	0.154651	-0.151467	0.015824	0.22824	0.266337	0.215591	0.17181	0.292341	0.346153	0.210225	0.152146	0.0351943	0.0544305	0.245695	0.0974847	0.185114	0.147326	0.32281	0.286751	0.332994	0.362705	0.302414	0.274479	0.229368	0.000932767	0.0066326	0.0919337	0.233662	-0.217066	-0.00123205	0.11125	-0.155251	0.0240405	0.204097	-0.243607	-0.318234	-0.120159	-0.327421	-0.214753	-0.257996	-0.155172	0.195834	0.0815838	0.271287	-0.146316	0.278039	-0.277433
VIT_00s0271g00060	0.24716	0.092515	0.216651	0.278749	0.111835	0.0447122	0.408134	0.158349	0.167638	-0.0283406	0.0482571	0.202427	0.288512	0.256246	0.135691	0.24194	0.226255	0.197357	-0.0867497	-0.0720876	0.00879037	-0.232604	-0.146999	0.168676	-0.0700685	-0.276569	-0.13434	0.0511584	-0.109942	-0.280497	-0.0186515	-0.0206821	-0.0676021	0.113496	-0.296034	-0.224997	0.0213109	-0.0332172	-0.0915892	-0.109268	-0.16279	0.23228	0.283788	0.296522	0.0871297	0.0429029	-0.181556	-0.126239	0.202345
VIT_00s0271g00070	0.271656	0.224043	0.360218	0.370169	-0.0710164	0.0607176	0.396523	0.330119	0.0658579	0.234662	0.298846	0.367348	0.423039	0.245692	0.322154	0.298717	0.299677	0.380585	-0.170322	0.180402	0.372369	-0.0385531	-0.0843076	-0.0199928	-0.215876	-0.403069	0.15578	0.384304	0.360213	0.124654	-0.384371	-0.404014	-0.0677719	0.0721884	-0.279307	-0.257154	-0.1862	-0.163517	-0.29886	-0.345392	-0.256911	-0.0315896	0.22268	0.469437	-0.0862274	0.0282771	-0.0441802	0.0404906	-0.190998
VIT_00s0271g00080	0.0659538	-0.114665	-0.138008	0.189805	-0.327185	-0.406287	-0.189928	-0.147868	-0.306792	-0.195053	-0.43902	-0.476677	-0.163841	-0.324241	-0.0818732	-0.349534	-0.32411	-0.301508	-0.291676	-0.113688	-0.228228	-0.170818	-0.354685	0.0627785	-0.382735	-0.0576006	0.255544	0.436113	0.217236	0.109973	0.210674	-0.108929	0.20723	0.30466	0.213494	-0.135368	0.127907	0.209672	0.235079	0.347404	0.343124	-0.0201363	-0.225616	-0.342178	-0.355334	-0.484855	0.150909	-0.211512	-0.0744499
VIT_00s0271g00090	-0.433482	-0.0703606	-0.391502	-0.13886	-0.618132	-0.428519	-0.593072	-0.466586	-0.615598	-0.313093	-0.552427	-0.630356	-0.486175	-0.751885	-0.392468	-0.672213	-0.562301	-0.522557	0.0359466	0.0226253	-0.164995	0.0933215	-0.0558018	-0.0970145	-0.271546	0.0372245	-0.0238756	0.147053	0.185401	0.414908	0.209752	-0.0647996	0.455354	0.435003	0.644341	0.383688	0.426818	0.606952	0.377952	0.522618	0.706079	-0.207781	-0.276588	-0.291713	-0.162098	-0.180775	0.482215	0.0375568	-0.521135
VIT_00s0271g00100	-0.155347	-0.0214503	-0.318737	-0.000722348	-0.579604	-0.709926	-0.561146	-0.718738	-0.562543	-0.640884	-0.59481	-0.425328	-0.474197	-0.350593	-0.523341	-0.638053	-0.376797	-0.558919	-0.348466	-0.272724	-0.683021	-0.545121	-0.385724	-0.227044	-0.149638	-0.243478	0.138219	0.301432	-0.166553	0.257492	0.663197	0.402786	0.313207	0.613116	0.245465	0.0795437	0.720241	0.643432	0.447358	0.562746	0.593983	0.483087	0.246867	-0.13599	0.250759	-0.135495	0.185241	-0.150714	-0.135739
VIT_00s0271g00110	0.494883	0.384697	0.610159	0.661318	0.00379338	0.171656	0.583031	0.545672	0.367371	0.501213	0.475158	0.571333	0.38287	0.487946	0.584417	0.499934	0.501286	0.512701	-0.236926	0.313171	0.414718	-0.037809	-0.178671	-0.113844	-0.29972	-0.407103	0.0841028	0.380753	0.560265	0.0829793	-0.523689	-0.558733	-0.136253	-0.0194424	-0.53744	-0.494555	-0.393657	-0.377197	-0.442831	-0.58347	-0.471721	-0.175426	0.160513	0.462967	-0.25975	-0.0927542	-0.302771	-0.178347	-0.187581
VIT_00s0273g00020	-0.193308	-0.285339	-0.19054	0.0238232	-0.215256	-0.319798	-0.271624	-0.381246	-0.189727	-0.421313	-0.526954	-0.500554	-0.430806	-0.380295	-0.387045	-0.396051	-0.387484	-0.435843	0.0320681	-0.151651	-0.362909	-0.131793	-0.0987079	0.110443	-0.0931872	0.0698825	-0.204062	-0.0114712	-0.339789	-0.224705	0.371671	0.278303	0.341131	0.461979	0.271996	0.227013	0.377949	0.295448	0.439745	0.450495	0.457506	0.166897	-0.0142074	-0.227085	0.101536	-0.0782145	0.016485	-0.0394646	0.144381
VIT_00s0274g00040	-0.201656	-0.00803262	-0.186297	-0.0980024	-0.534008	-0.48802	-0.184083	-0.438148	-0.560166	-0.438136	-0.0963293	0.0134337	-0.248944	-0.113477	-0.444012	-0.330194	-0.19929	-0.249037	-0.287511	-0.0702531	-0.27218	-0.375098	-0.053459	-0.11819	0.0581512	-0.328725	0.452054	0.531065	0.113574	0.562883	0.278321	0.289593	0.0906127	0.411733	0.172629	0.162208	0.563166	0.367381	0.210097	0.254099	0.359547	0.449148	0.494803	0.440903	0.52938	0.310454	0.0717421	-0.0443022	-0.312083
VIT_00s0274g00050	-0.771122	-0.257569	-0.349999	-0.348556	-0.696129	-0.398377	-0.557604	-0.590101	-0.656507	-0.369642	-0.291561	-0.411702	-0.4966	-0.730674	-0.674756	-0.655263	-0.608014	-0.563398	0.165747	0.194582	-0.0707463	0.209842	0.355748	0.00579973	0.154492	0.121558	0.000721291	0.17928	0.0584422	0.609607	0.207189	0.234208	0.530306	0.482168	0.733397	0.750404	0.567842	0.519402	0.489317	0.430842	0.743384	-0.115613	-0.0205533	0.157945	0.368537	0.396183	0.373604	0.196669	-0.658426
VIT_00s0274g00060	-0.353375	0.0333487	-0.379493	-0.0820723	-0.711161	-0.701467	-0.531298	-0.711539	-0.733398	-0.621573	-0.616946	-0.501268	-0.441151	-0.583558	-0.556342	-0.698425	-0.451254	-0.527797	-0.265848	-0.198951	-0.483834	-0.348183	-0.219093	-0.122259	-0.191072	-0.194044	0.00939423	0.27901	-0.0555968	0.337678	0.506762	0.262964	0.369843	0.64441	0.448114	0.271214	0.731093	0.813038	0.41419	0.602633	0.727931	0.305536	0.157779	-0.05263	0.227046	-0.0206739	0.545733	0.0601538	-0.352096
VIT_00s0274g00070	0.617837	0.385993	0.660285	0.462747	0.55511	0.563093	0.599744	0.621598	0.643523	0.632294	0.750421	0.819415	0.641464	0.827588	0.694811	0.790014	0.758921	0.765426	-0.00642464	0.151242	0.448093	0.0151559	0.0181026	-0.243478	0.067844	-0.139013	0.0518485	0.0778972	0.281175	-0.292927	-0.531212	-0.349635	-0.545183	-0.459531	-0.744703	-0.503	-0.63219	-0.646609	-0.679156	-0.76028	-0.796613	-0.0777948	0.157382	0.391737	-0.127487	0.0620326	-0.325978	-0.0754438	0.293834
VIT_00s0274g00080	-0.0549069	-0.113135	0.345566	0.452252	-0.439961	-0.126	0.310524	0.233134	-0.00781496	0.201761	0.170877	0.113598	-0.0614117	-0.094167	0.0342437	0.00313791	-0.121449	-0.0574651	-0.124657	0.402551	0.352004	0.147953	0.0599287	0.172065	-0.266737	-0.306103	0.172022	0.574934	0.589648	0.469237	-0.360269	-0.382595	0.357598	0.37115	0.0719422	0.0284334	-0.0066538	-0.173033	0.15078	-0.168377	0.131007	-0.271315	0.120724	0.524535	-0.0416649	0.135681	-0.309591	-0.226301	-0.527305
VIT_00s0274g00090	-0.374463	-0.321023	-0.147047	0.01072	-0.588006	-0.302126	-0.0227768	-0.0851453	-0.404003	-0.156496	-0.162909	-0.26652	-0.513839	-0.470558	-0.385318	-0.411386	-0.553165	-0.474435	-0.034261	0.298235	0.115812	0.104589	0.0793406	0.260245	-0.272643	-0.257149	0.303756	0.478384	0.528398	0.739712	-0.114214	-0.160295	0.431516	0.386957	0.520185	0.321562	0.351279	0.133387	0.534941	0.272924	0.541237	-0.147884	0.151851	0.319589	0.131913	0.162941	-0.235764	-0.193269	-0.609628
VIT_00s0275g00030	-0.291779	-0.00050247	0.267151	0.0706506	-0.19456	0.166835	0.110821	0.0366505	0.00404943	0.261898	0.1866	0.0752815	-0.0103276	-0.17677	-0.00623565	0.107496	0.0245685	0.105418	0.319317	0.702651	0.236002	0.307667	0.339972	0.248989	0.203085	0.260154	-0.219233	0.158925	0.205346	0.22902	-0.116809	-0.0108132	0.308673	0.137355	0.132803	0.318422	-0.0764035	-0.0328482	-0.049179	-0.225654	0.0349323	-0.330316	-0.254552	0.212798	0.0176547	0.222712	0.126597	0.242245	-0.485164
VIT_00s0276g00020	0.570071	0.350917	0.194013	0.348686	0.37827	0.312432	0.255163	0.4835	0.340734	0.435777	0.0637251	0.0619942	0.252597	0.256546	0.637013	0.347374	0.324021	0.389444	-0.0540872	0.0017068	0.214473	0.0331884	-0.352645	-0.0883278	-0.460239	-0.0365057	-0.0165045	-0.0524959	0.361236	-0.29279	-0.355141	-0.555985	-0.336145	-0.369354	-0.322019	-0.520143	-0.548308	-0.258628	-0.432209	-0.267634	-0.384613	-0.305281	-0.352096	-0.42713	-0.735028	-0.636036	-0.0353177	-0.0692126	0.243298
VIT_00s0279g00030	-0.312539	-0.437928	0.163789	-0.227532	0.275928	0.351679	0.189221	0.23118	0.404657	0.30927	0.365512	0.0895973	0.213549	0.0264772	-0.0230275	0.249034	-0.00956717	0.069109	0.339844	0.0537063	0.29583	0.565341	0.649409	0.42427	0.604829	0.660221	-0.140164	-0.252937	-0.28579	-0.250234	-0.13021	0.209551	0.102215	-0.258134	0.0631927	0.348684	-0.376874	-0.491546	0.0287355	-0.226406	-0.197009	-0.385266	-0.377202	0.044532	0.100358	0.400718	-0.124871	0.131123	0.116296
VIT_00s0279g00040	-0.709836	-0.479389	0.0286879	-0.461055	0.0511415	0.317376	-0.0682644	-0.135809	0.0617786	0.072254	0.324966	0.0888031	-0.111065	-0.195707	-0.421636	0.0167411	-0.204578	-0.13447	0.605989	0.352344	0.233142	0.54985	0.863989	0.316657	0.765753	0.564153	-0.196759	-0.231251	-0.308966	0.121772	-0.0011806	0.449536	0.287517	-0.0553197	0.364078	0.778534	0.0392135	-0.199693	0.248134	-0.0814605	0.115795	-0.216852	-0.0937616	0.362496	0.566706	0.813937	0.0278179	0.10348	-0.19556
VIT_00s0279g00050	-0.533901	-0.406956	0.21334	-0.326851	0.217915	0.467747	0.125981	0.0981975	0.295021	0.339848	0.548891	0.255613	0.131104	0.0188916	-0.167818	0.257032	-0.0105388	0.0820995	0.569307	0.365059	0.379619	0.647902	0.89979	0.316517	0.822536	0.711162	-0.152854	-0.186279	-0.180553	-0.00624115	-0.158251	0.337325	0.112404	-0.259735	0.171073	0.621188	-0.267851	-0.457047	0.0233646	-0.311008	-0.128171	-0.387396	-0.256977	0.334431	0.386937	0.735528	-0.0630075	0.145004	-0.11252
VIT_00s0279g00070	-0.15128	-0.108091	0.575221	0.2986	0.0800825	0.372705	0.348371	0.280922	0.357909	0.422191	0.528174	0.409362	0.252825	0.153234	0.137469	0.360641	0.206468	0.287483	0.350196	0.425437	0.555119	0.462805	0.555445	0.116509	0.322915	0.189262	-0.297122	0.0702202	0.0611085	-0.160291	-0.412081	-0.113257	0.167892	0.0599566	-0.125788	0.269592	-0.306768	-0.413281	-0.135701	-0.466063	-0.21088	-0.358762	-0.0246037	0.578883	0.159903	0.526401	-0.0659537	0.0166537	-0.145784
VIT_00s0279g00100	-0.387428	-0.199109	-0.411236	-0.290176	-0.338654	-0.322225	-0.450386	-0.521006	-0.519479	-0.512365	-0.341152	-0.338761	-0.471859	-0.383664	-0.59237	-0.533794	-0.495711	-0.516808	0.121605	-0.108154	-0.29607	-0.156626	0.0810007	-0.116751	0.0862104	-0.00675208	0.169532	0.113567	-0.101062	0.255866	0.314159	0.356158	0.120024	0.300577	0.470964	0.440754	0.555013	0.406382	0.426616	0.501378	0.586983	0.246963	0.230551	0.0326147	0.420077	0.234834	0.109766	-0.136627	-0.0902698
VIT_00s0281g00010	-0.389557	-0.462661	-0.55444	-0.271059	-0.357673	-0.533023	-0.523502	-0.646007	-0.504878	-0.727955	-0.764272	-0.72866	-0.697194	-0.580961	-0.715177	-0.734379	-0.714065	-0.82807	-0.0436108	-0.301341	-0.661444	-0.324996	-0.21225	0.177216	-0.0845045	-0.0244161	-0.00751038	-0.0275315	-0.388262	0.115756	0.714931	0.524414	0.452463	0.487348	0.537284	0.299049	0.734119	0.543642	0.816684	0.804681	0.747526	0.382253	0.115684	-0.320458	0.264645	-0.0835245	-0.00656966	-0.201182	0.014581
VIT_00s0281g00020	-0.162122	-0.376709	-0.414432	-0.0671385	-0.226864	-0.332515	-0.291109	-0.242921	-0.292587	-0.363449	-0.710319	-0.78365	-0.470902	-0.568445	-0.295748	-0.528193	-0.592793	-0.610785	0.000910285	-0.245489	-0.390966	-0.0610008	-0.296441	0.288699	-0.329897	0.0822609	-0.0719898	-0.0753329	-0.131955	-0.024256	0.403065	0.0659712	0.423938	0.299817	0.444107	0.0446023	0.30061	0.335227	0.567311	0.632846	0.532498	-0.0523376	-0.319577	-0.568801	-0.319421	-0.456799	0.0229184	-0.206516	-0.0305968
VIT_00s0282g00010	-0.294203	0.1147	0.387023	0.176962	-0.455999	-0.230329	-0.0331415	-0.250758	0.000385983	0.164173	0.283029	0.236147	0.144637	0.00612055	-0.104701	0.0523033	0.170322	0.0951129	-0.136237	0.269306	-0.0653205	0.0626291	0.326329	-0.027356	0.517537	0.374981	-0.0668991	0.391142	0.0405473	0.225712	0.197153	0.331027	0.30094	0.325585	-0.0939333	0.241462	0.0366135	0.0406097	-0.139525	-0.289713	0.0166431	-0.140437	-0.182279	0.314816	0.244478	0.360267	0.30367	0.32175	-0.487254
VIT_00s0282g00020	-0.378831	-0.531232	-0.616585	-0.526971	-0.0437601	-0.0352369	-0.244168	-0.0386576	-0.347751	-0.267564	-0.353314	-0.570099	-0.43288	-0.544705	-0.382587	-0.458941	-0.682783	-0.535935	0.28203	-0.0859676	0.0472184	0.287377	0.122854	0.35206	-0.15754	0.0919772	0.269088	-0.170822	0.0566052	0.284063	0.00487156	-0.0390537	0.156787	-0.128419	0.688745	0.353676	0.169184	0.0930013	0.568038	0.533117	0.461949	-0.162331	-0.146717	-0.296086	-0.0627906	-0.0632785	-0.0790202	-0.0187594	-0.0891026
VIT_00s0282g00030	-0.272762	0.161985	-0.0271189	-0.0744256	-0.218155	0.189096	-0.117084	0.0523655	-0.284096	0.18501	0.0364442	-0.062335	0.0322168	-0.384807	0.0337653	-0.103252	-0.109301	0.0690093	0.352983	0.438252	0.45691	0.394665	0.244824	-0.0541892	-0.190665	-0.0194838	-0.167531	0.0388847	0.44227	0.349621	-0.422074	-0.435477	0.0942614	0.0124115	0.372702	0.344465	-0.0389877	0.193464	-0.108657	-0.0445754	0.197018	-0.436296	-0.176998	0.128411	-0.166466	0.0884567	0.306594	0.139564	-0.539795
VIT_00s0282g00040	0.0509156	0.176209	-0.57802	-0.310337	-0.140898	-0.466638	-0.49809	-0.599341	-0.554991	-0.717981	-0.455455	-0.199	-0.426085	-0.0443717	-0.424398	-0.481948	-0.195212	-0.358606	-0.260286	-0.582577	-0.67604	-0.697258	-0.435722	-0.408675	-0.100539	-0.364798	0.283545	-0.0606748	-0.281659	0.101686	0.583887	0.430989	-0.253226	0.129259	0.0948201	-0.0812238	0.665838	0.628487	0.249999	0.570485	0.356227	0.749186	0.532962	-0.141014	0.400438	-0.0726891	0.202231	-0.0130638	0.22831
VIT_00s0282g00050	0.0787659	-0.0996567	-0.423827	-0.353077	0.232352	0.100822	-0.0804579	0.165055	-0.164018	-0.156596	-0.134167	-0.157074	-0.125989	-0.112711	-0.0120181	-0.158732	-0.214025	-0.0875671	0.125844	-0.0774017	0.211941	0.102093	-0.0989429	-0.00306384	-0.349091	-0.294988	0.273675	-0.235166	0.031026	0.0351893	-0.278164	-0.317651	-0.277217	-0.327837	0.227431	-0.0262514	-0.02737	-0.00317653	0.108096	0.232697	0.027936	0.0612055	0.182938	-0.200737	-0.0896168	-0.149699	-0.120716	-0.0703842	0.231018
VIT_00s0283g00020	0.543022	0.106617	-0.192367	0.0828793	0.437243	0.0672065	0.127074	0.104082	0.0373485	-0.301035	-0.208759	0.0285205	-0.0398791	0.353478	0.11995	0.0676398	0.0978976	0.0395959	-0.10685	-0.471181	-0.233772	-0.530627	-0.522637	-0.174634	-0.390827	-0.515914	0.135626	-0.173065	-0.179017	-0.402058	0.0624363	-0.0513703	-0.471399	-0.16119	-0.2899	-0.478359	0.0953019	0.00214214	-0.00512569	0.201122	-0.147794	0.553343	0.495329	-0.102104	0.011634	-0.294996	-0.351734	-0.414925	0.681076
VIT_00s0283g00030	-0.479993	-0.413222	-0.637797	-0.443561	-0.351722	-0.420315	-0.493674	-0.575946	-0.647812	-0.704136	-0.505554	-0.514665	-0.666233	-0.51546	-0.751228	-0.703081	-0.708304	-0.731985	0.0972363	-0.238559	-0.353769	-0.16107	0.0446611	0.0222218	0.010408	-0.116722	0.181371	-0.0167148	-0.234183	0.290918	0.398226	0.400069	0.209094	0.336298	0.623101	0.482783	0.702937	0.471532	0.672011	0.725225	0.721889	0.337622	0.328055	0.00256852	0.486794	0.247121	-0.0212285	-0.149898	-0.0549851
VIT_00s0283g00060	0.518637	0.208373	0.323722	0.271305	0.389104	0.318261	0.501771	0.687783	0.596122	0.6619	0.356384	0.253195	0.527018	0.430895	0.712122	0.563874	0.442533	0.494353	-0.25262	0.0565925	0.27465	0.177813	-0.163538	0.142971	-0.159812	0.181451	0.17102	0.0559016	0.408304	-0.126622	-0.368876	-0.45136	-0.286382	-0.529517	-0.427271	-0.562877	-0.741487	-0.537161	-0.472518	-0.488114	-0.591993	-0.431011	-0.48883	-0.311733	-0.696317	-0.509724	-0.185287	0.0645348	0.135774
VIT_00s0283g00070	-0.0542595	-0.134902	-0.159591	-0.090897	-0.126215	-0.351646	-0.325836	-0.396502	-0.12222	-0.305406	-0.26345	-0.242372	-0.0965908	-0.0500679	-0.237471	-0.222799	-0.112652	-0.233794	-0.254062	-0.323774	-0.522745	-0.280485	-0.1362	-0.0327008	0.230411	0.236289	0.169148	0.113698	-0.357402	-0.111636	0.579173	0.490204	0.132055	0.19196	0.00971938	-0.0163079	0.207194	0.169795	0.147247	0.256339	0.145659	0.277064	-0.125332	-0.306699	0.0888191	-0.134911	0.200296	0.0114078	0.199187
VIT_00s0285g00010	-0.337496	-0.224033	-0.193818	-0.505897	0.334038	0.40766	-0.0952999	0.0391074	0.034997	0.125874	0.171303	-0.0422746	-0.0343899	-0.121519	-0.105611	0.042467	-0.120417	-0.00291255	0.492894	0.0641638	0.207219	0.427375	0.483268	0.156523	0.392848	0.495955	-0.107636	-0.417871	-0.148678	-0.0644684	-0.104571	0.148816	-0.130908	-0.442964	0.27468	0.388399	-0.2113	-0.182145	0.020984	-0.0247156	-0.0505885	-0.253771	-0.277535	-0.146048	0.0867058	0.248103	0.142527	0.241758	0.0682999
VIT_00s0285g00020	-0.265945	-0.26595	-0.15691	-0.396348	0.207032	0.146187	-0.238936	-0.0564292	0.113526	0.0876974	0.0307617	-0.193622	0.0439376	-0.146678	-0.0872056	-0.0293836	-0.118722	-0.0723798	0.258263	-0.066516	0.0221714	0.396138	0.359405	0.118113	0.411576	0.619062	-0.082225	-0.335101	-0.336625	-0.199665	0.0672738	0.218746	3.43933e-06	-0.266647	0.170935	0.280491	-0.232734	-0.17179	-0.0194845	0.0181909	-0.0556671	-0.260296	-0.463247	-0.408417	-0.0598785	0.0516183	0.103767	0.195937	0.146367
VIT_00s0285g00030	-0.225433	-0.344612	-0.31129	-0.536584	0.422129	0.28503	-0.0982866	0.0567725	0.0752033	-0.0197081	0.0652541	-0.130778	0.0271279	-0.0558169	-0.158323	-0.022563	-0.203398	-0.121899	0.337168	-0.169434	0.07108	0.298108	0.355311	0.204913	0.343515	0.425769	0.0337141	-0.413736	-0.274588	-0.195747	0.0183521	0.222572	-0.208761	-0.472692	0.251047	0.275183	-0.145319	-0.197032	0.153995	0.143642	-0.00408969	-0.0886748	-0.183824	-0.237344	0.100645	0.164239	-0.0425882	0.010066	0.32838
VIT_00s0285g00040	-0.264599	-0.407317	-0.465085	-0.537451	0.256178	0.0032125	-0.325987	-0.252345	-0.100453	-0.30801	-0.274037	-0.41067	-0.170808	-0.20546	-0.336741	-0.247347	-0.345739	-0.336334	0.230429	-0.343109	-0.280726	0.0908185	0.181208	0.196234	0.330627	0.468953	0.0254836	-0.392381	-0.54211	-0.302155	0.381058	0.471453	-0.032638	-0.194371	0.310173	0.282158	0.0932507	0.0481876	0.294769	0.405154	0.192381	0.107139	-0.206508	-0.46922	0.12672	0.0213643	0.101304	0.0415898	0.422976
VIT_00s0285g00050	0.397323	0.0478406	-0.236059	-0.0136543	0.347644	0.095773	0.00880694	0.321487	0.191225	0.115087	-0.313767	-0.351407	0.0184806	-0.0205169	0.365684	0.0319817	-0.0220466	0.0194348	-0.134041	-0.296829	-0.0782157	-0.000330585	-0.454377	0.0705054	-0.492918	0.030208	0.0173474	-0.298455	0.0720643	-0.275805	-0.0615851	-0.360464	-0.194656	-0.364781	-0.0465333	-0.449203	-0.342209	-0.0945933	-0.0790471	0.122814	-0.155546	-0.185206	-0.428264	-0.794796	-0.727842	-0.791158	-0.0775849	0.0389772	0.334893
VIT_00s0285g00060	-0.355854	-0.603297	-0.242388	-0.349166	-0.107645	-0.0906937	-0.0468903	-0.0765096	-0.129161	-0.231217	-0.0069563	-0.160823	-0.283194	-0.192041	-0.435048	-0.245205	-0.428547	-0.406194	0.139193	-0.0483084	0.00107086	0.159528	0.300205	0.301556	0.23969	0.068602	0.299415	0.0381068	-0.166017	0.241748	0.0899896	0.252076	0.211634	0.0684732	0.340587	0.32606	0.208205	-0.14672	0.502607	0.263906	0.240603	0.0693392	0.150255	0.196838	0.380344	0.358093	-0.419322	-0.25775	-0.0597172
VIT_00s0286g00010	-0.211529	-0.227316	-0.261457	-0.360012	-0.0803604	-0.0933642	0.142167	0.0611217	-0.100744	-0.0779899	0.052865	-0.0347866	-0.0559228	-0.0590969	-0.200698	-0.0139555	-0.17754	-0.134182	-0.114488	-0.0534296	-0.0513983	0.0414917	0.141826	0.403113	0.18786	0.0908646	0.346307	0.0698503	0.0582498	0.404475	0.0736222	0.190679	0.0153989	-0.144923	0.16976	0.111246	0.0725096	-0.0617676	0.159229	0.0815385	0.0421398	0.0388413	0.0349275	0.0716294	0.198167	0.17119	-0.174987	0.170327	-0.185917
VIT_00s0286g00020	-0.119578	-0.149676	-0.592075	-0.371536	-0.104883	-0.419398	-0.518948	-0.526768	-0.465559	-0.669878	-0.628707	-0.514504	-0.408771	-0.299842	-0.437736	-0.546918	-0.392933	-0.502468	-0.135903	-0.528194	-0.6261	-0.418529	-0.338951	-0.0791269	-0.103323	-0.0984649	0.0681578	-0.213766	-0.464967	-0.0691729	0.632052	0.417306	0.0494999	0.165995	0.273797	0.00873822	0.528146	0.510601	0.420905	0.65725	0.409758	0.51019	0.15431	-0.425753	0.164726	-0.213462	0.223875	-0.157373	0.24461
VIT_00s0286g00130	0.641028	0.635172	0.135144	0.208099	0.40541	0.157367	0.143631	0.145694	0.204465	0.0906835	0.191059	0.453952	0.35728	0.613331	0.445037	0.373965	0.598203	0.505679	-0.224185	-0.230373	-0.0952327	-0.465533	-0.409018	-0.467283	-0.146742	-0.335628	0.0538844	-0.109895	0.0164472	-0.338376	-0.0695521	-0.113485	-0.648065	-0.322426	-0.606737	-0.55684	-0.168416	0.000136864	-0.555461	-0.278568	-0.466313	0.356768	0.309646	-0.0275875	-0.0771663	-0.24199	0.0482337	0.257114	0.458842
VIT_00s0287g00010	-0.0833192	0.0330756	-0.411806	-0.431741	0.253921	0.116371	-0.239872	-0.130838	-0.140932	-0.172936	-0.245024	-0.23287	-0.199448	-0.167434	-0.114392	-0.167259	-0.146363	-0.129437	0.145115	-0.0979168	-0.115832	-0.00445587	-0.0574944	-0.0490462	-0.0947845	0.0355758	-0.173329	-0.472206	-0.171296	-0.0805301	0.0494914	0.0473826	-0.213289	-0.312696	0.216447	0.108897	0.0762709	0.181868	0.0837213	0.228451	0.0917948	0.0831648	-0.0113537	-0.396801	-0.0125283	-0.123555	0.112985	0.14855	0.214383
VIT_00s0287g00020	-0.15596	-0.221991	-0.0945012	-0.0156404	-0.13142	-0.131341	-0.246504	-0.0876856	-0.0726897	-0.0475063	-0.311924	-0.437233	-0.168828	-0.392158	-0.07933	-0.248259	-0.282836	-0.222239	0.0487813	0.000629236	0.0201942	0.247044	0.0272798	0.135137	-0.154754	0.2061	-0.119534	-0.0309466	-0.129376	-0.135314	0.0389365	-0.101545	0.315305	0.199445	0.280539	0.161954	-0.0322545	0.0790154	0.190228	0.222045	0.218249	-0.250337	-0.377725	-0.363878	-0.292615	-0.227137	0.113448	0.0253098	-0.00856141
VIT_00s0287g00030	0.124897	0.0239338	0.283074	0.0894477	0.112927	0.224068	0.247585	0.444584	0.352547	0.476633	0.432628	0.325632	0.383304	0.230255	0.370571	0.339708	0.256587	0.307103	-0.116814	0.164727	0.373544	0.304339	0.125555	-0.000342866	0.053565	0.0389675	0.102586	0.0330529	0.276976	0.185894	-0.390438	-0.331481	-0.0234745	-0.282956	-0.219359	-0.191438	-0.455179	-0.448601	-0.267366	-0.448178	-0.414432	-0.354541	-0.184127	0.106515	-0.241403	-0.0202355	-0.208905	0.061012	-0.197832
VIT_00s0287g00040	0.219815	0.127658	0.649373	0.39053	0.229679	0.390922	0.489397	0.474624	0.618381	0.605788	0.513311	0.487563	0.456475	0.398986	0.486946	0.568754	0.499654	0.468747	0.00260856	0.269373	0.316943	0.220778	0.138106	0.0994343	0.157019	0.114435	-0.299081	-0.0126969	0.15198	-0.149183	-0.302396	-0.223467	0.0601054	-0.167631	-0.467569	-0.254213	-0.48893	-0.487963	-0.327854	-0.629271	-0.532933	-0.318806	-0.202544	0.245847	-0.210435	0.0477779	-0.202623	-0.155594	-0.0793888
VIT_00s0287g00050	0.443583	0.111741	0.041944	0.16082	0.390505	0.20412	0.173663	0.431513	0.307174	0.330651	0.00667013	-0.0789437	0.270231	0.16644	0.486204	0.207289	0.143348	0.21138	-0.134293	-0.14587	0.165324	0.105236	-0.253825	0.0205959	-0.319454	0.108541	0.0723465	-0.102299	0.206516	-0.349092	-0.244231	-0.422449	-0.319973	-0.427236	-0.173848	-0.428234	-0.530297	-0.294802	-0.248403	-0.117186	-0.294514	-0.30446	-0.41281	-0.526095	-0.678701	-0.590828	-0.0680565	-0.0248371	0.365687
VIT_00s0287g00070	0.325291	0.352741	0.625505	0.300067	0.416668	0.533435	0.456604	0.550434	0.69966	0.751523	0.744015	0.724687	0.607289	0.623476	0.632919	0.730707	0.704109	0.692721	0.0144365	0.295352	0.428307	0.246916	0.20786	-0.158049	0.245541	0.16989	-0.158267	-0.0884951	0.246411	-0.136788	-0.455831	-0.263605	-0.308406	-0.474286	-0.59102	-0.292747	-0.649563	-0.56724	-0.620421	-0.794605	-0.715376	-0.34765	-0.167826	0.239105	-0.190678	0.0998052	-0.161885	0.164036	0.00230677
VIT_00s0287g00080	0.532445	0.454894	0.694416	0.422248	0.465683	0.500314	0.594284	0.668681	0.7624	0.766103	0.799651	0.836798	0.784193	0.793229	0.773042	0.839763	0.837806	0.823416	-0.146456	0.199621	0.477155	0.14643	0.0834869	-0.188299	0.149012	0.00310946	-0.0544967	-0.0110619	0.265468	-0.241068	-0.540468	-0.369569	-0.431508	-0.489427	-0.765582	-0.491532	-0.729883	-0.625242	-0.751752	-0.876274	-0.85598	-0.257314	-0.0427686	0.308912	-0.236727	0.0311198	-0.183468	0.191268	0.133363
VIT_00s0291g00020	0.632371	0.749117	0.586629	0.522635	0.297326	0.262858	0.317507	0.347304	0.523316	0.498433	0.460469	0.670986	0.625485	0.688745	0.731246	0.644458	0.881707	0.786315	-0.226469	0.028095	0.161855	-0.170088	-0.232225	-0.478677	-0.0428661	-0.141773	-0.233702	-0.050368	0.0905251	-0.389145	-0.285844	-0.308936	-0.418434	-0.221895	-0.821712	-0.588625	-0.478229	-0.201934	-0.837389	-0.68499	-0.716213	-0.0241668	0.0045328	0.0940807	-0.286434	-0.203569	0.12866	0.181337	0.173157
VIT_00s0291g00050	0.158289	0.181527	0.151368	0.373536	-0.266155	-0.419437	-0.0853929	-0.264771	0.0546461	-0.240885	-0.331285	-0.0888787	-0.0567908	0.0246513	-0.0505296	-0.0867249	0.10532	-0.0847859	-0.416052	-0.171903	-0.472203	-0.466787	-0.414663	-0.101813	-0.15689	-0.235912	-0.270079	0.0941584	-0.259109	-0.166662	0.416853	0.212078	0.316118	0.520717	-0.245971	-0.217802	0.304941	0.312477	0.0825052	0.0671261	0.0980133	0.332722	0.153141	-0.0689606	0.0316268	-0.21599	0.107939	0.0998428	0.0408633
VIT_00s0291g00060	0.0426548	0.169557	-0.259739	-0.0946281	0.113458	0.0793835	-0.208994	-0.0819746	-0.266593	-0.21575	-0.309252	-0.21229	-0.13285	-0.225765	-0.00991825	-0.185345	-0.0952038	-0.00678241	0.238909	-0.00655373	0.0957396	-0.0379461	-0.160608	-0.180605	-0.39923	-0.275985	-0.272168	-0.301245	-0.0944994	-0.2178	-0.120579	-0.232603	-0.140057	0.0101235	0.171506	0.0564479	0.138371	0.33565	0.000944234	0.255169	0.16684	0.0983906	0.135107	-0.154782	-0.0895645	-0.154706	0.207607	0.295815	0.135637
VIT_00s0291g00070	0.657158	0.317641	0.0960591	0.106906	0.710478	0.314329	0.256502	0.272426	0.435052	0.0633604	0.0963909	0.312144	0.367172	0.645696	0.441078	0.468866	0.52858	0.441604	-0.10292	-0.340618	-0.159798	-0.38648	-0.388276	-0.185616	-0.0764479	-0.181809	-0.0725504	-0.368835	-0.330605	-0.651271	0.0335732	0.0157603	-0.570567	-0.431457	-0.620702	-0.59391	-0.281182	-0.219946	-0.407034	-0.223349	-0.580639	0.396488	0.212791	-0.227169	-0.123858	-0.310667	-0.142033	-0.0281384	0.777218
VIT_00s0291g00080	0.501712	0.362094	0.572082	0.452255	0.464999	0.540318	0.500396	0.562022	0.502481	0.521745	0.53003	0.603519	0.571341	0.575044	0.630849	0.671876	0.627799	0.691383	0.149197	0.238475	0.484121	0.115936	0.0232465	-0.166934	-0.0435584	-0.154004	-0.192839	-0.0547221	0.143649	-0.382803	-0.528086	-0.421513	-0.330452	-0.266986	-0.586276	-0.365458	-0.55203	-0.464956	-0.624366	-0.634014	-0.65859	-0.147408	0.0753995	0.307596	-0.206712	0.0171171	-0.146468	-0.0171828	0.213442
VIT_00s0291g00090	0.0614735	-0.188756	-0.204076	-0.193443	0.406103	0.210636	-0.101161	0.165514	0.203118	0.0540618	-0.302074	-0.426874	-0.0118301	-0.189135	0.151232	-0.0135264	-0.118986	-0.0500358	0.202337	-0.16604	-0.0129559	0.265197	-0.060203	0.22579	-0.141053	0.361241	-0.306886	-0.523932	-0.334662	-0.533902	0.00620216	-0.10398	-0.00904688	-0.283951	0.104134	-0.0594216	-0.317663	-0.119554	0.0277536	0.149851	-0.0828908	-0.23788	-0.522845	-0.748464	-0.485878	-0.447972	0.0840255	0.0232771	0.420648
VIT_00s0291g00100	0.544831	0.384921	-0.232157	0.0559158	0.21241	-0.226274	-0.181104	-0.247255	-0.119077	-0.467821	-0.293552	0.0651694	-0.0355787	0.37149	0.0614188	-0.0652151	0.244531	0.0697844	-0.278563	-0.530594	-0.515529	-0.746823	-0.660477	-0.505746	-0.26039	-0.520081	0.111599	-0.192302	-0.417698	-0.406807	0.343225	0.159543	-0.465438	0.00362133	-0.417948	-0.519083	0.277612	0.294941	-0.177484	0.206992	-0.151541	0.762857	0.544749	-0.220274	0.1182	-0.330398	-0.0227436	-0.0781658	0.611392
VIT_00s0299g00010	-0.451952	-0.384194	-0.384014	-0.42373	0.0941446	0.12237	-0.240036	-0.222677	-0.170175	-0.256282	-0.35322	-0.471402	-0.382356	-0.469204	-0.385128	-0.306398	-0.442649	-0.389549	0.480767	-0.0380887	-0.103183	0.229611	0.248317	0.323652	0.125173	0.343465	-0.361769	-0.445668	-0.32975	-0.170369	0.202738	0.261579	0.193934	-0.0274387	0.499079	0.477019	0.211303	0.193311	0.442393	0.411306	0.38613	-0.0793911	-0.203584	-0.281755	0.106231	0.107253	0.118568	-0.0868441	0.0789243
VIT_00s0299g00030	0.206898	0.066392	-0.28193	-0.171282	0.331152	0.170682	-0.0801578	0.065437	-0.0111066	-0.193005	-0.316366	-0.20095	-0.0524637	-0.0368131	0.105503	-0.0238857	-0.00267865	0.0358028	0.198513	-0.131263	-0.0536016	-0.112771	-0.299968	-0.0537369	-0.318048	-0.233533	-0.235744	-0.510667	-0.345426	-0.382	-0.0354913	-0.160515	-0.157692	-0.15431	-0.0180373	-0.166571	-0.0184594	0.0985134	-0.0545599	0.157197	-0.106325	0.180758	0.0747022	-0.392031	-0.189266	-0.336005	-0.00742434	-0.0444683	0.378828
VIT_00s0299g00040	-0.10066	-0.161067	-0.479764	-0.560261	0.368641	0.330263	-0.0255594	0.210896	-0.0805197	0.000447437	-0.0411952	-0.185917	-0.0879052	-0.147215	-0.0275524	-0.0493721	-0.222121	-0.072235	0.319053	-0.0882777	0.220132	0.285379	0.137463	0.171591	-0.0954623	0.0944928	0.107279	-0.416542	0.0734166	0.0556444	-0.23984	-0.167007	-0.310893	-0.549261	0.343331	0.158798	-0.122089	-0.0637031	0.102911	0.197074	0.0358229	-0.151686	-0.11103	-0.271411	-0.110469	-0.0583984	-0.102308	0.0293809	0.162669
VIT_00s0299g00050	-0.540524	-0.40258	-0.293914	-0.636532	0.0250787	0.199708	-0.155722	0.0127475	-0.151106	0.038841	0.270397	0.00854017	-0.00522492	-0.22172	-0.327491	-0.105236	-0.32028	-0.155784	0.341216	0.211513	0.348981	0.50635	0.635429	0.194706	0.391982	0.30838	0.324147	-0.0519295	0.0832926	0.451737	-0.23141	0.116475	-0.0268154	-0.307946	0.490684	0.602573	-0.028271	-0.188941	0.186026	0.0344031	0.141209	-0.221873	-0.0285197	0.185761	0.347592	0.514702	-0.0899812	0.174566	-0.203819
VIT_00s0299g00060	0.292582	0.368334	0.87316	0.586486	0.260732	0.592331	0.663285	0.658165	0.709792	0.862933	0.722817	0.696067	0.618274	0.496282	0.717389	0.819567	0.72305	0.785043	0.147387	0.572704	0.632401	0.377191	0.259646	0.0447607	0.111137	0.117968	-0.397153	0.0694405	0.353968	-0.174203	-0.617543	-0.456379	-0.0191293	-0.17811	-0.579997	-0.223393	-0.699993	-0.567721	-0.66969	-0.90432	-0.692068	-0.526111	-0.254428	0.419722	-0.307046	0.112165	-0.105404	0.117392	-0.205059
VIT_00s0299g00070	0.0524555	0.0679882	0.271171	0.257783	0.103079	0.284189	0.0938834	0.194992	0.0988863	0.250558	0.169563	0.135633	0.139362	0.0253908	0.204814	0.156562	0.0961699	0.172814	0.287386	0.260615	0.352605	0.24104	0.136892	-0.123629	-0.089133	-0.038462	-0.26224	-0.0256741	0.183488	-0.116018	-0.338591	-0.312019	-0.0103266	0.00413442	-0.0394638	0.0389179	-0.196053	-0.141309	-0.156632	-0.188984	-0.0819429	-0.262481	-0.0461979	0.19804	-0.136329	0.0850814	-0.027536	-0.221176	-0.0935787
VIT_00s0299g00080	-0.2114	-0.283256	-0.54124	-0.532146	0.0892832	-0.268537	-0.418441	-0.565112	-0.292597	-0.652657	-0.34977	-0.271255	-0.374499	-0.0675537	-0.566654	-0.360912	-0.289109	-0.427913	0.0323836	-0.530164	-0.637694	-0.36594	-0.0250934	-0.00126475	0.365361	0.126377	0.140769	-0.295364	-0.715577	-0.168399	0.697649	0.775495	-0.0708923	0.0453916	0.175644	0.19811	0.524249	0.325063	0.398396	0.542936	0.280361	0.627267	0.293526	-0.191909	0.553517	0.193367	0.0435429	0.0666786	0.431477
VIT_00s0299g00090	-0.086186	-0.202223	-0.518242	-0.571994	0.305746	0.0622716	-0.176352	-0.156612	-0.176508	-0.393894	-0.168363	-0.131916	-0.239695	-0.0124506	-0.27803	-0.168983	-0.192651	-0.197409	0.213448	-0.227033	-0.193462	-0.116306	-0.00207044	0.0812493	0.108897	-0.0846313	0.141924	-0.457228	-0.441584	-0.0938268	0.21231	0.293486	-0.211895	-0.264505	0.169416	0.103456	0.232395	0.113251	0.238246	0.333135	0.0577066	0.397423	0.291789	-0.154989	0.309579	0.106563	-0.072743	-0.00460964	0.388324
VIT_00s0299g00100	0.215307	0.486175	0.419953	0.442306	-0.168458	-0.203626	0.0413106	-0.112466	0.124574	0.0991087	0.066135	0.265127	0.384367	0.23943	0.266122	0.217905	0.476302	0.353642	-0.385028	0.0130109	-0.141415	-0.260524	-0.193972	-0.269613	0.0407518	-0.0687012	-0.331533	0.140005	-0.112902	-0.232132	0.141076	0.0465378	0.0709211	0.292208	-0.458841	-0.264782	-0.0494847	0.162055	-0.422574	-0.325977	-0.232042	0.111551	0.00520422	0.0994524	-0.057282	-0.0797074	0.444243	0.256523	-0.0647256
VIT_00s0299g00110	-0.320694	-0.605009	-0.253003	-0.138442	-0.247522	-0.316145	-0.235616	-0.183649	-0.181945	-0.300298	-0.414072	-0.57343	-0.404377	-0.497818	-0.422164	-0.472524	-0.632318	-0.600597	-0.0337911	-0.0451985	-0.122043	0.137764	0.0411012	0.302309	-0.112422	0.0869696	0.0521659	0.0594812	-0.157131	0.0648838	0.161353	0.109756	0.449048	0.301367	0.469432	0.284358	0.203577	-0.00155691	0.619128	0.435132	0.457413	-0.0661043	-0.112858	-0.235649	0.00753641	-0.0544048	-0.210079	-0.221646	-0.0132784
VIT_00s0301g00020	0.347166	0.281315	0.249444	0.0838624	0.562009	0.639757	0.404666	0.732974	0.533933	0.720274	0.43819	0.297459	0.546214	0.315086	0.733862	0.602906	0.456387	0.611348	0.199053	0.13365	0.600143	0.495932	0.128061	0.0484103	-0.100932	0.240895	-0.14569	-0.319038	0.305534	-0.274012	-0.64788	-0.612797	-0.389217	-0.673564	-0.295819	-0.296352	-0.8088	-0.476998	-0.617896	-0.525568	-0.609647	-0.610872	-0.504205	-0.215714	-0.650763	-0.279123	-0.0207152	0.13529	0.119268
VIT_00s0301g00030	-0.628544	-0.581565	-0.513648	-0.483344	-0.466383	-0.357217	-0.473427	-0.406763	-0.490126	-0.379533	-0.329928	-0.526114	-0.704279	-0.636309	-0.678858	-0.657266	-0.777006	-0.741709	0.0747172	0.0598505	-0.153616	0.184991	0.237849	0.181949	0.0653751	0.126544	0.32451	0.140287	0.0631378	0.63025	0.20558	0.238545	0.404827	0.228213	0.743489	0.567943	0.455957	0.200291	0.706708	0.54538	0.657828	-0.0667391	-0.0213372	-0.0770015	0.28176	0.208347	-0.175703	-0.157805	-0.374312
VIT_00s0301g00040	0.050306	-0.163869	0.673441	0.253668	0.327841	0.464404	0.578657	0.494682	0.778066	0.660345	0.662115	0.506676	0.470967	0.435337	0.365124	0.668857	0.43993	0.43705	0.12699	0.321537	0.346247	0.400346	0.446755	0.360137	0.520223	0.437474	-0.192049	-0.0192741	-0.0323422	-0.199487	-0.263746	0.0271976	0.107984	-0.225739	-0.428339	-0.0570179	-0.587678	-0.736489	-0.281883	-0.689025	-0.586139	-0.387898	-0.297784	0.288717	-0.0347815	0.296662	-0.365678	-0.0016929	0.0235664
VIT_00s0301g00050	0.41471	0.509621	0.561977	0.270106	0.483718	0.557227	0.493455	0.533	0.600645	0.62816	0.663984	0.732215	0.635218	0.646781	0.690565	0.777	0.806922	0.824253	0.0843983	0.12938	0.445868	0.17344	0.134742	-0.179773	0.189839	0.0472654	-0.33188	-0.267598	0.0321772	-0.373071	-0.487366	-0.313445	-0.407065	-0.434025	-0.683519	-0.352809	-0.633845	-0.443252	-0.799779	-0.774771	-0.815042	-0.216239	-0.0653793	0.251303	-0.177435	0.0878491	-0.0289692	0.140333	0.133603
VIT_00s0301g00060	-0.11394	-0.34539	0.031364	-0.171678	0.080558	0.0822361	0.403166	0.229657	0.269854	0.0967029	0.253825	0.137278	0.0221717	0.139832	-0.0828399	0.214746	-0.0236692	0.00329237	0.0357875	0.0339145	0.0629574	0.17394	0.286551	0.572994	0.348775	0.23385	0.254688	0.0215979	-0.109693	0.0702418	-0.0404848	0.212521	0.0380875	-0.150642	-0.0368481	0.0936764	-0.141726	-0.388649	0.0869358	-0.14504	-0.181027	-0.0436195	-0.0115582	0.161611	0.21615	0.279926	-0.417074	0.103864	0.0546563
VIT_00s0301g00070	-0.283333	-0.308166	-0.075638	-0.267167	-0.0121631	-0.0477774	0.190048	-0.133582	-0.00494606	-0.181632	0.0856863	0.0307621	-0.083213	0.00898831	-0.344724	0.0102073	-0.127378	-0.132581	0.12062	-0.0530038	-0.134031	-0.00223892	0.314797	0.473334	0.470781	0.250969	0.157235	0.0333987	-0.31014	-0.00100039	0.228498	0.492693	0.0575075	0.0205534	0.0912474	0.294126	0.155349	-0.0872788	0.197576	0.0581408	0.064704	0.190102	0.127633	0.210394	0.474306	0.431429	-0.0905379	0.064987	0.096329
VIT_00s0301g00080	-0.114101	-0.252409	0.327941	-0.0704079	0.183398	0.249506	0.552169	0.269717	0.440424	0.314247	0.598582	0.471676	0.238843	0.395339	0.00632701	0.46526	0.229818	0.22415	0.0528283	0.170398	0.13927	0.185479	0.47843	0.488589	0.653528	0.374001	0.202384	0.124735	-0.0481448	0.0797881	-0.0561348	0.346586	-0.053272	-0.247688	-0.236784	0.104848	-0.262814	-0.566649	-0.08694	-0.432703	-0.371071	-0.06049	0.0140995	0.430214	0.378952	0.528598	-0.379264	0.0686837	0.0114022
VIT_00s0301g00090	0.609949	0.577815	0.221207	0.356742	0.187471	0.159171	0.420941	0.293937	0.0774924	0.143297	0.308832	0.546455	0.266855	0.591581	0.419117	0.412457	0.507879	0.495159	-0.171751	0.0270431	0.109054	-0.424502	-0.356701	-0.306512	-0.266291	-0.545783	0.291964	0.267166	0.401668	0.0298937	-0.284369	-0.30762	-0.573243	-0.180347	-0.516149	-0.512802	-0.105528	-0.0725978	-0.513134	-0.319943	-0.388126	0.282454	0.47156	0.375785	-0.0113488	-0.0894515	-0.203667	-0.109714	0.142298
VIT_00s0301g00100	-0.064752	0.472725	-0.37564	-0.220755	-0.159772	-0.215109	-0.587685	-0.572615	-0.493231	-0.423644	-0.376515	-0.156169	-0.328231	-0.181361	-0.222064	-0.363632	-0.0179581	-0.120741	0.0575986	-0.178408	-0.407649	-0.378482	-0.257284	-0.576975	-0.0881032	-0.16985	-0.242105	-0.268448	-0.209161	0.0139647	0.350743	0.195394	-0.149361	0.136502	0.114599	0.102948	0.479946	0.710917	-0.0751024	0.333257	0.291631	0.345748	0.186131	-0.219771	0.166769	-0.0832641	0.511295	0.143403	-0.0291201
VIT_00s0301g00110	-0.316556	-0.306998	-0.445785	-0.384292	0.000749341	0.095118	-0.276911	0.0354959	-0.162325	-0.0695323	-0.346066	-0.537057	-0.414372	-0.553061	-0.147318	-0.332764	-0.47658	-0.329345	0.399265	0.0703751	0.175903	0.458129	0.133344	0.19223	-0.225519	0.184968	-0.158187	-0.425578	-0.0459306	0.0363895	-0.166214	-0.241713	0.20965	-0.0980621	0.548882	0.329865	-0.0248122	0.0875484	0.286232	0.339777	0.296312	-0.396751	-0.382918	-0.474887	-0.298597	-0.18576	0.0103343	0.0678475	-0.100885
VIT_00s0301g00120	0.578125	0.388616	0.735717	0.477121	0.538723	0.617715	0.788655	0.788946	0.772977	0.756054	0.796267	0.843736	0.787538	0.81592	0.800835	0.935248	0.831322	0.878306	-0.00721455	0.266017	0.56212	0.146377	0.0749061	-0.0248229	0.0713075	-0.088712	-0.0687021	0.0233422	0.279479	-0.299595	-0.624964	-0.432931	-0.422918	-0.459737	-0.773385	-0.505745	-0.748728	-0.703746	-0.750378	-0.888537	-0.891436	-0.218052	0.0326295	0.422866	-0.226239	0.0541791	-0.292072	0.0355113	0.178036
VIT_00s0301g00150	0.608356	0.364783	0.669235	0.45777	0.588389	0.638931	0.813919	0.811434	0.786427	0.721862	0.694727	0.746545	0.722535	0.778512	0.814543	0.932051	0.803179	0.856436	0.0339485	0.223054	0.508798	0.132778	0.0103416	0.0518937	0.00812896	-0.0753239	-0.11425	-0.0601129	0.231237	-0.366674	-0.597024	-0.441897	-0.41055	-0.468491	-0.757589	-0.538708	-0.748209	-0.68457	-0.730473	-0.827013	-0.884345	-0.214284	-0.0210447	0.299835	-0.299471	-0.0452237	-0.308837	0.0148948	0.241349
VIT_00s0301g00160	0.503794	0.376531	0.749769	0.47989	0.446274	0.550792	0.762979	0.698095	0.721608	0.698009	0.782701	0.847348	0.752986	0.782276	0.726134	0.898862	0.819238	0.845182	-0.0218716	0.252469	0.508984	0.119169	0.108755	-0.010408	0.141736	-0.0879434	-0.094898	0.0596407	0.229937	-0.264588	-0.546414	-0.346275	-0.341394	-0.356903	-0.756146	-0.449932	-0.658996	-0.634553	-0.717833	-0.86931	-0.841612	-0.17221	0.0693336	0.503927	-0.13194	0.13839	-0.22165	0.063456	0.11513
VIT_00s0301g00170	0.0762755	0.165634	-0.544111	-0.276487	-0.137767	-0.463613	-0.522353	-0.459682	-0.367822	-0.51907	-0.584153	-0.407853	-0.287804	-0.193484	-0.22957	-0.471229	-0.200764	-0.349344	-0.357303	-0.523062	-0.62172	-0.493444	-0.522465	-0.292015	-0.25152	-0.183487	0.0614344	-0.210003	-0.287316	-0.0117103	0.516753	0.226055	-0.0963459	0.064023	0.118352	-0.169455	0.419877	0.55382	0.188055	0.506927	0.292006	0.426858	0.0889419	-0.578343	-0.0436103	-0.438735	0.216551	-0.0192362	0.199797
VIT_00s0301g00180	0.463012	0.42444	-0.336346	0.124119	-0.0884248	-0.324738	-0.28774	-0.172523	-0.278299	-0.338915	-0.52929	-0.265863	-0.287154	-0.0234619	0.135228	-0.27844	0.0150714	-0.0923939	-0.320313	-0.369095	-0.401766	-0.550683	-0.786638	-0.431	-0.6764	-0.54267	0.0922105	-0.0778945	0.0340021	-0.0775777	0.184735	-0.254443	-0.21194	0.0991254	-0.116031	-0.507464	0.249074	0.477147	-0.0599236	0.342754	0.10276	0.345988	0.166788	-0.479036	-0.356198	-0.693102	0.0943125	-0.160531	0.186976
VIT_00s0301g00190	-0.0087645	0.30817	-0.459875	-0.112011	-0.281446	-0.24128	-0.42649	-0.271104	-0.57061	-0.257918	-0.498951	-0.44644	-0.340207	-0.430927	-0.0638462	-0.434324	-0.261647	-0.216052	-0.000412909	-0.151042	-0.147241	-0.126876	-0.343828	-0.275685	-0.479508	-0.19619	0.00894267	-0.0375248	0.239612	0.213022	0.0606572	-0.278424	-0.0462353	0.109369	0.341875	-0.00199628	0.270839	0.605269	-0.00222266	0.432023	0.398947	-0.0674059	-0.146434	-0.390465	-0.340629	-0.428445	0.416123	0.0726341	-0.236855
VIT_00s0302g00010	-0.0758166	-0.0167455	0.160102	0.255065	-0.295183	-0.212196	0.0620779	-0.0294125	-0.12288	0.0643541	0.0190204	-0.044252	0.123855	-0.112612	-0.00769326	-0.0735489	-0.0666225	-0.0505496	-0.174316	-0.00447478	0.0714361	0.0672468	0.0803033	0.0574493	-0.00265921	0.0910952	0.0526131	0.378524	0.215906	0.0955414	0.00291948	-0.0621121	0.140668	0.237415	0.053426	0.0223336	0.0234276	0.0895454	0.0373381	0.0544542	0.175844	-0.179269	-0.133548	0.184243	-0.0705512	0.0506153	0.159153	-0.191249	-0.259364
VIT_00s0302g00020	-0.0897221	0.00265655	0.499476	0.0941055	0.229028	0.571223	0.583345	0.528065	0.388486	0.614364	0.751128	0.580582	0.425397	0.28653	0.306053	0.576852	0.337909	0.491905	0.334659	0.459448	0.730544	0.556316	0.625667	0.266019	0.348082	0.202506	-0.096827	0.0406458	0.301226	0.0626119	-0.640335	-0.265329	-0.0995294	-0.302105	-0.16026	0.184807	-0.501576	-0.551181	-0.35473	-0.62138	-0.425133	-0.463535	-0.0617373	0.63224	0.0961216	0.548647	-0.148726	0.061924	-0.212039
VIT_00s0302g00050	-0.0465237	0.0763506	-0.276295	-0.383425	0.24854	0.331767	0.144046	0.233567	-0.113007	0.0702686	0.193941	0.174568	0.00807936	0.0582133	0.0528965	0.121883	0.00306459	0.133375	0.226241	0.126575	0.260062	0.12046	0.107825	0.0476796	-0.037598	-0.168547	0.145348	-0.251526	0.240121	0.342173	-0.31127	-0.187241	-0.329214	-0.454149	0.130431	0.0564872	-0.0622831	-0.0679725	-0.105888	-0.0548112	-0.127694	-0.0324623	0.187103	0.144918	0.0910956	0.153779	-0.118006	0.254717	-0.111361
VIT_00s0302g00060	-0.179664	-0.0498601	0.531193	0.107031	0.0690712	0.296102	0.37845	0.21513	0.389287	0.419823	0.660989	0.576845	0.407671	0.322252	0.0982184	0.430894	0.326475	0.319138	0.10494	0.389707	0.36647	0.294993	0.541555	0.109675	0.547345	0.201588	-0.150665	0.0864542	0.0384538	0.0802269	-0.244799	0.111486	0.0799439	-0.0840738	-0.242109	0.184953	-0.235531	-0.417471	-0.1855	-0.542223	-0.319224	-0.184547	0.0724514	0.646013	0.345001	0.629461	-0.138477	0.0100235	-0.199954
VIT_00s0304g00010	-0.257736	-0.0185845	-0.0928438	0.225925	-0.570907	-0.38824	-0.218616	-0.438641	-0.49935	-0.394793	-0.468311	-0.375455	-0.462756	-0.474566	-0.38879	-0.462567	-0.386586	-0.409179	0.0472719	0.121383	-0.20801	-0.203241	-0.137956	-0.035997	-0.289841	-0.278272	-0.181624	0.286161	0.0944272	0.22473	0.2091	0.0346468	0.457858	0.702142	0.347174	0.267114	0.576777	0.557378	0.374656	0.411581	0.625389	0.114473	0.192063	0.19099	0.150136	0.0527943	0.228434	-0.207329	-0.371544
VIT_00s0304g00020	-0.448505	-0.338205	-0.56521	-0.296683	-0.411226	-0.344798	-0.538694	-0.334791	-0.545873	-0.347697	-0.713956	-0.886192	-0.5392	-0.87021	-0.410297	-0.707167	-0.750106	-0.646906	0.123527	-0.0548316	-0.156456	0.212802	-0.0615245	0.204404	-0.346722	0.172338	-0.0514318	-0.0459535	0.0536544	0.229639	0.217212	-0.0753333	0.463174	0.284894	0.781405	0.386406	0.317816	0.486976	0.558888	0.679467	0.731241	-0.278782	-0.44507	-0.581426	-0.320516	-0.345826	0.341205	0.0265503	-0.302284
VIT_00s0304g00030	0.256551	0.0649824	0.347451	0.587825	-0.133532	-0.199994	-0.0152031	-0.0864464	0.159686	-0.0931301	-0.251018	-0.0751211	0.0191618	0.0462429	0.104319	-0.0275721	0.104052	-0.0358339	-0.148501	0.0137133	-0.198389	-0.271727	-0.355168	-0.146227	-0.274589	-0.275685	-0.38705	0.0684116	-0.244609	-0.41683	0.176535	-0.0542167	0.330892	0.539504	-0.284192	-0.267519	0.108481	0.104221	0.0609897	0.00321013	0.023009	0.157464	0.103548	0.00166178	-0.135062	-0.232822	-0.0900169	-0.217917	0.126947
VIT_00s0304g00050	-0.331757	-0.234419	-0.530034	-0.440587	-0.2564	-0.388427	-0.52571	-0.516566	-0.503105	-0.517012	-0.407563	-0.4304	-0.308037	-0.36361	-0.503429	-0.510327	-0.436987	-0.474393	-0.0322425	-0.23772	-0.429168	-0.175996	-0.0355438	-0.0490185	0.128205	0.0923925	0.183292	-0.0417296	-0.299414	0.211688	0.463371	0.418304	0.116455	0.179961	0.384776	0.2645	0.456981	0.390496	0.342105	0.520983	0.431861	0.277446	0.0475215	-0.258224	0.26559	0.0227534	0.174771	0.0778203	-0.0421182
VIT_00s0304g00060	0.281176	0.509055	-0.00866235	0.0845461	0.186547	0.101178	-0.0582479	0.0754995	-0.0454892	0.145027	0.0101069	0.0812256	0.228365	0.132049	0.359294	0.141831	0.301052	0.337285	-0.0935914	-0.164182	0.0866042	-0.0494705	-0.183925	-0.326906	-0.199458	-0.0105373	-0.0921841	-0.119879	0.150691	-0.220844	-0.142586	-0.270192	-0.368891	-0.263295	-0.171666	-0.247131	-0.221833	0.162764	-0.456123	-0.107912	-0.178652	-0.08857	-0.149171	-0.237013	-0.350309	-0.297989	0.634502	0.0902731	0.130704
VIT_00s0304g00070	-0.00491926	0.174905	0.26271	0.372605	-0.414306	-0.0878286	0.18006	0.272554	-0.0704966	0.363959	0.102241	0.0115473	0.226654	-0.212544	0.260876	0.0275811	0.00165529	0.125987	-0.211921	0.351223	0.4535	0.292954	0.0124533	0.0470545	-0.392301	-0.158754	0.067107	0.48755	0.725543	0.436123	-0.479503	-0.627591	0.224024	0.186051	0.115478	-0.027196	-0.196457	0.00258099	-0.155063	-0.209683	0.0853786	-0.520195	-0.236825	0.197744	-0.425033	-0.14522	0.134085	-0.0465433	-0.586797
VIT_00s0304g00080	0.0841901	0.0378634	0.330349	0.112824	0.345533	0.460646	0.542803	0.5388	0.477036	0.491269	0.372135	0.286998	0.437884	0.215749	0.417988	0.540801	0.337542	0.468822	0.155784	0.30423	0.465556	0.396787	0.245399	0.337458	0.058045	0.183841	-0.268167	-0.186258	0.0985822	-0.20649	-0.45426	-0.278644	-0.0586304	-0.308754	-0.216211	-0.0609125	-0.522467	-0.425714	-0.341975	-0.480573	-0.440432	-0.366735	-0.226145	0.112086	-0.217212	0.0680223	0.00491749	0.308334	0.0272407
VIT_00s0309g00010	-0.108203	0.0345096	-0.182313	-0.200824	0.0377331	-0.0774947	-0.178557	-0.226603	-0.163347	-0.208372	-0.157096	-0.111828	-0.0914057	-0.120828	-0.154755	-0.143177	-0.0760013	-0.0897619	0.000953606	-0.241417	-0.0974269	-0.0312437	0.0416533	-0.0366326	0.0511297	0.0105051	-0.129325	-0.209066	-0.262186	-0.140713	0.0998978	0.136473	-0.0314279	0.0116608	0.0948716	0.139135	0.146857	0.212201	0.0267575	0.149373	0.0923232	0.138484	0.0971451	-0.0591233	0.142437	0.0983928	0.267338	0.186716	0.163319
VIT_00s0309g00020	-0.145453	-0.109069	-0.332181	-0.467153	0.433986	0.406376	-0.17442	0.0434511	0.0407519	-0.0137408	-0.191118	-0.28087	-0.223174	-0.224516	-0.0102949	-0.0287253	-0.127433	-0.0325757	0.505581	-0.0102202	0.0673152	0.296152	0.130792	0.124325	0.000503637	0.268283	-0.376946	-0.711793	-0.320539	-0.317871	-0.0529078	-0.0228012	-0.059144	-0.37305	0.254408	0.212659	-0.135888	0.0186514	0.0516264	0.145686	-0.0210928	-0.148795	-0.281834	-0.480122	-0.168944	-0.116755	0.184109	0.118457	0.274695
VIT_00s0309g00050	0.578557	0.512351	0.708726	0.436699	0.560151	0.655353	0.727349	0.764379	0.752848	0.799025	0.813008	0.868114	0.749393	0.81272	0.851742	0.944687	0.895521	0.941701	0.0209494	0.315198	0.568087	0.16593	0.0822865	-0.101512	0.080387	-0.0340425	-0.114134	-0.0491611	0.300888	-0.290097	-0.638256	-0.452234	-0.483283	-0.532959	-0.785215	-0.501415	-0.781217	-0.647884	-0.846581	-0.919415	-0.927594	-0.260884	-0.0336869	0.342312	-0.272313	0.0195678	-0.175655	0.128606	0.151156
VIT_00s0309g00090	0.610068	0.533089	0.648705	0.396317	0.616151	0.69572	0.69199	0.777867	0.743371	0.790621	0.76025	0.816446	0.718202	0.787033	0.875698	0.930664	0.883628	0.943762	0.0678185	0.293757	0.567471	0.170213	0.036989	-0.129613	0.0150498	-0.0459485	-0.14172	-0.128541	0.29178	-0.324799	-0.6571	-0.499315	-0.52311	-0.583228	-0.764669	-0.517854	-0.797752	-0.62729	-0.856994	-0.886876	-0.929312	-0.270304	-0.0642009	0.243517	-0.337221	-0.0596987	-0.176194	0.163875	0.189326
VIT_00s0313g00010	-0.567071	-0.453766	-0.747673	-0.48738	-0.513834	-0.533357	-0.619533	-0.623364	-0.790427	-0.723806	-0.725476	-0.792547	-0.725041	-0.809243	-0.783888	-0.886678	-0.881058	-0.854091	0.0506321	-0.202061	-0.385792	-0.0937628	-0.0416631	0.134958	-0.180936	-0.0522915	0.19036	0.067623	-0.0972109	0.410238	0.434013	0.281428	0.354942	0.395366	0.833692	0.509916	0.726247	0.622719	0.788461	0.881904	0.902974	0.199867	0.0874104	-0.242893	0.248184	0.0142638	0.136118	-0.135302	-0.215804
VIT_00s0313g00020	-0.177749	-0.206762	0.0929987	-0.316655	0.519653	0.677072	0.328675	0.329705	0.314243	0.326259	0.42683	0.247554	0.171413	0.132615	0.0913096	0.364517	0.112062	0.248555	0.652688	0.307864	0.406851	0.462506	0.512487	0.315852	0.409907	0.370533	-0.215863	-0.430502	-0.126947	-0.175466	-0.29585	0.0320996	-0.174101	-0.516813	0.0338314	0.26526	-0.362211	-0.446908	-0.0995233	-0.295498	-0.319278	-0.259076	-0.14673	0.136418	0.122881	0.370288	-0.180511	0.147184	0.0986487
VIT_00s0313g00030	-0.339405	0.110167	-0.0764861	0.00356538	-0.352286	-0.0896435	-0.307881	-0.229452	-0.234671	0.0631765	-0.271362	-0.361925	-0.284579	-0.502728	-0.0778037	-0.26109	-0.200791	-0.177076	0.160253	0.139498	-0.0300865	0.236494	0.0916817	-0.01316	-0.0646098	0.305508	-0.414699	-0.078798	0.172171	0.166266	0.0851019	-0.087313	0.357505	0.225353	0.350168	0.283539	0.0989079	0.389493	0.0658346	0.158886	0.3561	-0.437779	-0.516069	-0.265037	-0.293686	-0.143389	0.452928	0.0812168	-0.49517
VIT_00s0313g00040	-0.224923	0.274145	-0.594762	-0.326904	-0.445349	-0.503788	-0.632248	-0.670297	-0.769706	-0.591404	-0.493693	-0.345416	-0.450469	-0.385237	-0.454957	-0.622597	-0.327725	-0.400123	-0.158132	-0.228781	-0.467422	-0.410605	-0.264168	-0.41023	-0.177996	-0.238882	0.164613	0.0577812	0.0313891	0.40515	0.420518	0.225746	-0.043153	0.244752	0.394094	0.1932	0.669521	0.82528	0.211246	0.571448	0.586907	0.374862	0.254767	-0.152995	0.236821	-0.0576683	0.545262	0.127745	-0.223261
VIT_00s0313g00070	0.0350771	0.106203	-0.502074	-0.108623	-0.396731	-0.727596	-0.563987	-0.729723	-0.625068	-0.838683	-0.638497	-0.369311	-0.459594	-0.183679	-0.498802	-0.615995	-0.289711	-0.468868	-0.366226	-0.554153	-0.745748	-0.724458	-0.514272	-0.383715	-0.184776	-0.402702	0.252662	0.129979	-0.39843	0.00675335	0.668031	0.429163	-0.0103838	0.490199	0.110889	-0.0662103	0.756983	0.715186	0.308125	0.656154	0.487534	0.757798	0.498105	-0.172518	0.358511	-0.144922	0.261136	-0.131815	0.19318
VIT_00s0313g00080	-0.42977	-0.412202	-0.701635	-0.702234	0.162905	0.097025	-0.428905	-0.352575	-0.424161	-0.554568	-0.434549	-0.487098	-0.546284	-0.458086	-0.570999	-0.479678	-0.576697	-0.498979	0.578987	-0.168017	-0.153616	0.0714728	0.165383	0.0942983	0.0363992	0.040474	-0.0739331	-0.527718	-0.438132	-0.0630926	0.196079	0.293326	-0.0243978	-0.0971055	0.611404	0.518996	0.429733	0.297493	0.519129	0.620428	0.468574	0.246129	0.186254	-0.223046	0.358171	0.199106	-0.00306941	-0.0445357	0.237113
VIT_00s0316g00010	-0.0482721	-0.477359	-0.344451	-0.0390267	-0.118503	-0.224767	-0.0322251	0.125935	-0.076519	-0.171532	-0.554223	-0.690906	-0.319212	-0.47867	-0.112115	-0.369419	-0.557683	-0.49059	-0.102118	-0.139548	-0.0766545	0.131857	-0.263761	0.464098	-0.514455	-0.0348181	0.0735392	-0.0433048	0.0459843	-0.00046344	0.035202	-0.24509	0.355162	0.128805	0.39922	-0.0600769	0.0259873	0.0198856	0.525555	0.458492	0.348448	-0.202389	-0.304039	-0.530254	-0.463434	-0.508786	-0.245581	-0.221689	0.037845
VIT_00s0316g00040	-0.487274	-0.746059	-0.188386	-0.364815	-0.0380842	-0.101797	0.00666324	-0.169414	0.0177879	-0.204813	-0.0728428	-0.292078	-0.294872	-0.232766	-0.529609	-0.21585	-0.483043	-0.509277	0.124768	-0.0572735	-0.242469	0.150378	0.389964	0.635216	0.504866	0.485289	0.153135	-0.000625685	-0.315627	0.0848481	0.400275	0.608856	0.328337	0.0545173	0.365539	0.412782	0.188056	-0.179703	0.641779	0.289913	0.295427	0.03612	-0.110923	-0.00572071	0.383668	0.354298	-0.320067	-0.0690584	0.0624696
VIT_00s0317g00050	-0.386633	-0.025288	0.16005	-0.0490765	-0.396932	-0.0491786	-0.0399112	-0.015703	-0.122557	0.24775	0.327849	0.164029	0.234592	-0.167015	-0.106988	-0.0153644	-0.0595698	0.0181661	0.00433407	0.393499	0.308492	0.339898	0.440702	0.016021	0.297661	0.213678	0.136321	0.378911	0.388632	0.562337	-0.203055	-0.0375934	0.190795	0.098591	0.219208	0.38196	-0.0272905	-0.0377591	-0.0565799	-0.202556	0.13183	-0.371541	-0.149601	0.384479	0.141723	0.382956	0.0660122	0.178546	-0.629683
VIT_00s0317g00060	0.436646	0.0632351	0.228592	0.0367987	0.716286	0.620481	0.663958	0.66017	0.528565	0.409913	0.55903	0.559764	0.420498	0.645105	0.459112	0.637804	0.424858	0.49594	0.124132	-0.00666581	0.404616	0.0776179	0.0756473	0.137517	0.0489326	-0.115837	0.126294	-0.202322	0.149584	-0.251067	-0.485662	-0.243658	-0.591609	-0.675602	-0.43355	-0.341904	-0.510973	-0.636717	-0.349308	-0.453419	-0.631791	0.000328373	0.218438	0.25434	-0.0239016	0.102753	-0.520067	-0.151572	0.457262
VIT_00s0317g00070	0.189381	0.340881	-0.0698384	0.211561	-0.283678	-0.166651	-0.0668561	0.015069	-0.250736	0.0396526	-0.170061	-0.104987	-0.271972	-0.132624	0.13053	-0.156572	-0.0522209	-0.0284165	-0.223081	0.140686	-0.0127177	-0.179317	-0.384642	-0.224011	-0.548512	-0.340746	0.199771	0.318813	0.651771	0.430884	-0.161633	-0.413959	-0.0546705	0.0664028	0.0767168	-0.209969	0.0658341	0.218452	-0.0641251	0.0484886	0.159857	-0.0999478	-0.00995344	-0.1285	-0.336281	-0.395646	0.072463	0.0433033	-0.321454
VIT_00s0317g00080	-0.0149176	0.193959	0.158441	0.336919	-0.397653	-0.0886962	0.0609161	0.0610017	-0.19045	0.167568	-0.0138616	-0.0307994	-0.262385	-0.216312	0.0775036	-0.102354	-0.0908366	-0.0209069	-0.0517524	0.364248	0.218803	0.0725402	-0.0841065	-0.0634649	-0.397344	-0.227027	0.0442665	0.415279	0.687683	0.451311	-0.30616	-0.433258	0.17315	0.23098	0.143413	0.02275	0.0200583	0.0939584	-0.0154003	-0.0814171	0.1969	-0.302739	-0.0538875	0.164405	-0.228802	-0.108747	0.047443	0.0116194	-0.514858
VIT_00s0317g00090	-0.147095	0.079855	0.109842	0.222506	-0.466799	-0.143315	-0.0201131	-0.0388549	-0.271579	0.0451865	0.0235736	0.0152246	-0.267779	-0.236815	-0.0869431	-0.166197	-0.158693	-0.0870665	-0.00838817	0.456048	0.221884	0.0664799	0.017926	-0.0731243	-0.273817	-0.305402	0.131297	0.44868	0.563002	0.562693	-0.250422	-0.298913	0.26645	0.329904	0.211596	0.170562	0.159841	0.121903	0.0838561	-0.0456984	0.256232	-0.168544	0.130104	0.344699	0.0187032	0.0978249	0.00195859	0.123861	-0.564503
VIT_00s0317g00100	-0.394314	-0.145818	0.00200698	-0.219186	-0.1172	-0.00760862	-0.19908	-0.435963	-0.166642	-0.221895	-0.0627253	-0.045095	-0.24097	-0.157826	-0.387341	-0.133849	-0.0974941	-0.165125	0.242248	0.0773658	-0.272898	-0.0738031	0.241712	0.0703808	0.442973	0.226438	-0.276705	-0.097714	-0.394923	0.0199048	0.405487	0.533279	0.277758	0.229469	0.1433	0.377744	0.320667	0.180807	0.187728	0.0943753	0.16751	0.211267	0.0492679	0.141324	0.448729	0.375663	0.192386	0.000448278	-0.0989996
VIT_00s0317g00110	-0.520227	-0.606757	-0.0482575	-0.298303	-0.167057	-0.139251	0.0032801	-0.21869	-0.0433957	-0.290545	0.117696	0.0421042	-0.21655	-0.108837	-0.591407	-0.158923	-0.336586	-0.370849	0.0981376	0.000198034	-0.048923	0.103528	0.483798	0.369124	0.515767	0.0727655	0.0936045	0.0523726	-0.363992	0.205235	0.199438	0.540277	0.353392	0.256262	0.247489	0.510535	0.354753	-0.122474	0.536924	0.12404	0.231206	0.247124	0.396116	0.536983	0.770724	0.740099	-0.322826	-0.0671007	-0.0629262
VIT_00s0317g00130	-0.128882	-0.570045	-0.139118	-0.00770596	-0.332339	-0.503885	-0.121977	-0.148254	-0.0290199	-0.178021	-0.22089	-0.403938	-0.212645	-0.205811	-0.314732	-0.323909	-0.441584	-0.494764	-0.393161	-0.244892	-0.312358	-0.0168789	-0.0302769	0.334251	0.0729932	0.247507	0.603974	0.496534	0.0144463	0.212735	0.338391	0.266073	0.326091	0.256837	0.23411	0.0320556	0.112167	-0.127947	0.481546	0.318729	0.312963	-0.0122745	-0.214286	-0.238398	-0.0351143	-0.146289	-0.264854	-0.186783	0.0394656
VIT_00s0317g00140	0.0387758	0.204514	-0.101817	0.193193	-0.261469	-0.168297	-0.128488	-0.0227453	-0.293975	-0.0284567	-0.432045	-0.411194	-0.130393	-0.42205	0.142509	-0.2519	-0.155281	-0.0812448	-0.0988912	0.0118516	0.0421838	0.0261318	-0.322067	0.000422224	-0.568264	-0.16799	-0.248206	0.0256214	0.275802	0.0175072	-0.0658332	-0.446709	0.21794	0.211551	0.217019	-0.116946	0.0251781	0.372374	0.0115823	0.205346	0.250601	-0.248792	-0.305997	-0.33269	-0.554957	-0.492534	0.450893	-0.00380866	-0.251179
VIT_00s0317g00150	0.217093	-0.0473044	-0.380795	-0.0664143	0.0406391	-0.421123	-0.408765	-0.403045	-0.132713	-0.476467	-0.603151	-0.469554	-0.284161	-0.055513	-0.18166	-0.366663	-0.193529	-0.387306	-0.364226	-0.622575	-0.769221	-0.549782	-0.570483	-0.167243	-0.170046	0.00549958	0.0811385	-0.132809	-0.418021	-0.306894	0.67369	0.379994	-0.0601095	0.0928805	-0.0301482	-0.31482	0.296151	0.305104	0.246104	0.500718	0.205968	0.45228	-0.0363839	-0.701703	-0.123736	-0.543565	0.0222983	-0.208022	0.493632
VIT_00s0319g00010	-0.203405	-0.0972797	-0.175851	-0.246497	-0.144305	-0.308633	-0.241008	-0.591293	-0.269285	-0.542644	-0.0454495	0.11957	-0.268946	0.143674	-0.552514	-0.213054	-0.0773797	-0.269129	-0.0789309	-0.281973	-0.567949	-0.506934	0.0505574	-0.138363	0.506537	-0.0486578	0.204918	0.0928625	-0.457922	0.0848036	0.613414	0.805574	-0.0323301	0.24046	-0.0301257	0.203993	0.594538	0.257047	0.264851	0.23808	0.201611	0.71181	0.57877	0.334005	0.82883	0.495013	-0.0138404	-0.0830373	0.158348
VIT_00s0319g00060	-0.39799	-0.446155	-0.501435	-0.36042	-0.396851	-0.511552	-0.51464	-0.477925	-0.476965	-0.546041	-0.441022	-0.513342	-0.564481	-0.475675	-0.614693	-0.649925	-0.646125	-0.672531	-0.114182	-0.238713	-0.331508	-0.0712243	0.00325986	0.00816686	0.00968652	0.00306362	0.277757	0.099357	-0.199266	0.303078	0.348947	0.31173	0.274405	0.31092	0.504179	0.341171	0.479583	0.263194	0.581178	0.568091	0.547851	0.20472	0.119521	-0.177757	0.284994	0.073171	-0.10213	-0.239262	-0.0798143
VIT_00s0322g00020	0.125246	0.713323	0.111918	0.157999	-0.122143	0.0181251	-0.138297	-0.253635	-0.226737	-0.0800371	0.0120344	0.292971	0.0223681	0.125902	0.115844	0.073542	0.387526	0.329657	0.0826088	0.137368	-0.0623923	-0.312766	-0.174145	-0.534334	-0.0790523	-0.318818	-0.353154	-0.077576	0.00297305	-0.0309084	0.000238175	-0.0510045	-0.164091	0.168937	-0.234378	-0.0393454	0.216544	0.461675	-0.442135	-0.154192	-0.0653872	0.234197	0.289212	0.225527	0.143321	0.0665949	0.491795	0.166693	-0.164033
VIT_00s0322g00030	0.595706	0.597153	0.548	0.600296	0.228337	0.165285	0.297329	0.233844	0.393286	0.316454	0.186332	0.417178	0.534721	0.496255	0.623679	0.515574	0.724086	0.644441	-0.169945	0.0267822	0.0522475	-0.223013	-0.323292	-0.311421	-0.155716	-0.182037	-0.37468	-0.0231454	-0.0852212	-0.541644	-0.117499	-0.259132	-0.199767	0.0466881	-0.707376	-0.555774	-0.321489	-0.0447303	-0.647686	-0.460121	-0.538047	0.0606204	-0.00867333	0.0483873	-0.317842	-0.277529	0.171537	0.0381552	0.224176
VIT_00s0322g00040	0.535808	0.34266	0.58802	0.602701	0.129945	-0.0271217	0.285064	0.204004	0.476319	0.314881	0.259643	0.410294	0.52224	0.548708	0.472797	0.428021	0.565045	0.421513	-0.461106	-0.0358697	-0.0689569	-0.292413	-0.304943	-0.239079	-0.0353785	-0.108363	-0.0966538	0.233687	0.0169598	-0.335395	-0.0166326	-0.0781389	-0.150178	0.036566	-0.691172	-0.559225	-0.31193	-0.279521	-0.431218	-0.473445	-0.482787	0.0899509	0.0297509	0.05089	-0.199322	-0.236939	-0.129678	-0.00194574	0.228267
VIT_00s0323g00020	-0.0203559	-0.118778	-0.182343	-0.203014	-0.0206646	-0.106671	-0.0841184	0.0469807	0.00467259	0.0177881	0.0487679	-0.0235037	0.122248	0.0397469	-0.035322	-0.0386714	-0.0867119	-0.113958	-0.22134	-0.0609762	-0.0861448	-0.00519581	-0.0320703	-0.0206538	0.0910522	0.0391412	0.319756	0.0527238	0.101052	0.327052	0.0496098	0.0537108	-0.057725	-0.163829	0.0383105	-0.0697253	-0.0190141	-0.0987895	0.048289	0.0289811	-0.0160215	-0.0262645	-0.0479606	-0.112505	-0.0162706	-0.0649972	-0.245591	0.046111	-0.0911401
VIT_00s0323g00030	-0.101036	-0.393938	-0.221993	-0.260997	0.149297	-0.101592	-0.175992	-0.213842	0.083454	-0.294293	-0.136101	-0.141647	-0.0508576	0.0419008	-0.321316	-0.13447	-0.195275	-0.313141	-0.0206844	-0.297365	-0.342763	-0.129378	0.0436746	0.051995	0.299048	0.119828	0.0815521	-0.199028	-0.509611	-0.155857	0.350451	0.468002	0.0303388	0.0192866	0.0394358	0.107882	0.219247	-0.0605874	0.314832	0.247915	0.0996293	0.301528	0.160494	-0.105897	0.33199	0.146244	-0.378534	-0.149987	0.380355
VIT_00s0323g00040	0.144599	0.309278	0.346664	-0.066024	0.490097	0.542638	0.389341	0.408688	0.445018	0.470514	0.691036	0.688831	0.662519	0.530171	0.428567	0.648578	0.625786	0.69506	0.207599	0.119716	0.49239	0.2881	0.392809	-0.0581877	0.420983	0.142531	-0.191704	-0.333657	-0.116736	-0.29263	-0.439606	-0.106835	-0.426583	-0.50283	-0.448096	-0.047701	-0.498335	-0.389341	-0.646083	-0.644103	-0.66415	-0.138526	0.0454378	0.368154	0.112248	0.382854	0.0665428	0.522351	0.163262
VIT_00s0323g00050	-0.637929	-0.42354	-0.0565973	-0.29082	-0.422131	-0.207151	-0.207667	-0.245061	-0.193996	-0.110241	0.066767	-0.087525	-0.104371	-0.388647	-0.485703	-0.279156	-0.365018	-0.336598	0.0330562	0.273483	0.126271	0.331204	0.495182	0.194987	0.329149	0.108421	0.0246146	0.130478	-0.0642712	0.496419	0.0256736	0.220721	0.514996	0.310126	0.441798	0.597138	0.274905	0.0658254	0.403941	0.0850187	0.354652	-0.11751	0.0792461	0.378029	0.449189	0.564788	0.0455371	0.237021	-0.470759
VIT_00s0323g00060	-0.150069	-0.0257255	0.599261	0.0572811	0.335483	0.608846	0.334883	0.386816	0.64501	0.666691	0.743008	0.574179	0.51671	0.329273	0.303745	0.59148	0.443467	0.490152	0.375969	0.452212	0.56209	0.604918	0.682282	0.0793747	0.59704	0.483265	-0.398179	-0.230759	-0.0748681	-0.20537	-0.427822	-0.0224873	0.0274751	-0.30532	-0.269499	0.241397	-0.567754	-0.605419	-0.375524	-0.722247	-0.524443	-0.480694	-0.258451	0.37046	0.0917637	0.511692	-0.133952	0.230618	-0.0744165
VIT_00s0323g00070	0.531155	0.486226	0.717035	0.460585	0.508623	0.558448	0.568666	0.576954	0.757257	0.710203	0.698798	0.771096	0.655156	0.773647	0.749258	0.844883	0.855645	0.818683	0.00976133	0.213617	0.349923	0.0730997	0.0483804	-0.183271	0.188119	0.0949054	-0.259118	-0.10917	0.111715	-0.404209	-0.404339	-0.244609	-0.386582	-0.410467	-0.795938	-0.462835	-0.686703	-0.576549	-0.765565	-0.845585	-0.848881	-0.199084	-0.103449	0.209929	-0.228874	-0.00897034	-0.179353	0.0499521	0.192932
VIT_00s0323g00080	-0.049946	0.357295	0.373753	0.0514424	-0.0453717	0.25487	0.195772	0.121252	0.0298034	0.310856	0.619896	0.661458	0.386311	0.29622	0.156884	0.352878	0.425728	0.497813	0.104147	0.430114	0.457758	0.137701	0.356408	-0.22986	0.26121	-0.144706	0.0284786	0.203635	0.279756	0.28047	-0.402211	-0.128503	-0.187493	-0.0892037	-0.207765	0.152231	-0.132528	-0.124886	-0.451212	-0.53196	-0.295605	-0.0419153	0.29289	0.699285	0.333861	0.527476	0.128002	0.434767	-0.321496
VIT_00s0323g00100	0.631939	0.561633	0.743686	0.517659	0.551902	0.594595	0.666804	0.703748	0.767354	0.757711	0.714698	0.811512	0.834455	0.796169	0.885662	0.916246	0.936479	0.946641	-0.0349904	0.204951	0.487716	0.109177	-0.0133346	-0.163249	0.0350102	-0.0469328	-0.262376	-0.112804	0.173351	-0.45372	-0.556358	-0.448372	-0.442002	-0.447543	-0.843648	-0.569566	-0.767944	-0.56693	-0.86822	-0.893775	-0.927306	-0.22763	-0.0720993	0.251651	-0.344963	-0.0771108	-0.0722087	0.146122	0.216296
VIT_00s0324g00010	-0.591341	-0.55333	-0.318864	-0.516294	0.12843	0.321012	-0.15782	-0.0750266	-0.149458	-0.16158	-0.109584	-0.314045	-0.37715	-0.463596	-0.413674	-0.228004	-0.480009	-0.333437	0.783449	0.177057	0.226292	0.505327	0.538601	0.367896	0.254417	0.289767	-0.28705	-0.494815	-0.340819	-0.0441407	-0.0653604	0.145835	0.267556	-0.0468808	0.572794	0.661716	0.129417	-0.0185457	0.436342	0.279324	0.297748	-0.198451	-0.0872114	0.0330933	0.262741	0.424429	-0.0636805	-0.0263512	-0.0643776
VIT_00s0324g00020	-0.105019	-0.0791581	0.0661033	-0.00964911	-0.135667	-0.222342	-0.0620364	-0.32319	-0.0761013	-0.350442	0.0997083	0.25564	-0.00873417	0.200149	-0.324493	-0.0401711	0.0657816	-0.0565758	-0.0824938	-0.134561	-0.19926	-0.277384	0.124223	-0.123774	0.36049	-0.181702	0.0441194	0.0936207	-0.445278	-0.0872097	0.259933	0.464253	0.0348192	0.333814	-0.16238	0.144063	0.370523	0.0900801	0.102692	0.0320806	0.0299145	0.522546	0.575486	0.513046	0.687551	0.521454	-0.141398	-0.0928177	0.149117
VIT_00s0324g00030	0.396775	0.470426	0.575842	0.627772	-0.114617	0.030099	0.330943	0.242694	0.245947	0.345633	0.32758	0.482392	0.328224	0.398352	0.449593	0.387489	0.528226	0.471367	-0.240787	0.222107	0.172018	-0.168258	-0.197566	-0.261079	-0.154881	-0.299651	-0.0933747	0.314416	0.303168	0.00102045	-0.24148	-0.307048	-0.0324906	0.176591	-0.546515	-0.40992	-0.218513	-0.127683	-0.482348	-0.500933	-0.377866	-0.0386842	0.118078	0.348592	-0.148427	-0.0753174	-0.0072754	0.0894154	-0.207845
VIT_00s0324g00040	0.438628	0.427743	0.657692	0.312455	0.474529	0.570317	0.606452	0.56039	0.628043	0.649651	0.81542	0.88199	0.736272	0.76584	0.637198	0.822244	0.812337	0.82304	0.0218881	0.269735	0.483718	0.110248	0.175118	-0.149582	0.230755	-0.0697578	-0.0473457	0.00644733	0.207589	-0.192702	-0.530815	-0.277542	-0.450932	-0.455281	-0.696013	-0.342758	-0.588542	-0.560895	-0.725056	-0.837075	-0.803218	-0.113474	0.136117	0.494169	-0.012235	0.230848	-0.156978	0.107755	0.141382
VIT_00s0324g00050	0.194012	0.216714	0.701181	0.244732	0.512815	0.792002	0.667358	0.711047	0.73919	0.858991	0.867016	0.749965	0.670104	0.56678	0.643878	0.886	0.68757	0.807327	0.355979	0.485673	0.708655	0.518661	0.488208	0.132457	0.364563	0.312625	-0.255228	-0.115909	0.221909	-0.217449	-0.649238	-0.312823	-0.237553	-0.48933	-0.494601	-0.0765565	-0.782826	-0.718307	-0.669137	-0.891898	-0.773917	-0.508476	-0.254755	0.409855	-0.152874	0.296046	-0.187696	0.190287	-0.0261918
VIT_00s0324g00060	0.720193	0.57158	0.546751	0.498125	0.597786	0.608393	0.568957	0.732332	0.657211	0.724963	0.465548	0.532979	0.640548	0.626956	0.931079	0.775517	0.772246	0.825502	0.0319427	0.183497	0.438876	0.0910294	-0.211625	-0.146426	-0.25157	-0.0516085	-0.229148	-0.158126	0.310278	-0.467113	-0.547485	-0.615469	-0.488341	-0.518601	-0.692285	-0.649438	-0.775014	-0.459761	-0.785436	-0.675479	-0.78996	-0.325818	-0.257624	-0.0871689	-0.649778	-0.420274	-0.103434	0.00264596	0.255202
VIT_00s0324g00070	-0.0473094	0.134601	-0.343799	-0.0523822	-0.31334	-0.384131	-0.419296	-0.42784	-0.456185	-0.362437	-0.473261	-0.39587	-0.430967	-0.301053	-0.271177	-0.426989	-0.288425	-0.338788	-0.162426	-0.125809	-0.462006	-0.367057	-0.327162	-0.186256	-0.224797	-0.0531693	0.17337	0.218875	0.143266	0.245854	0.384427	0.164243	0.0449033	0.233104	0.257358	0.0424294	0.402624	0.487591	0.202698	0.426035	0.452605	0.189526	-0.0275897	-0.338743	-0.0441842	-0.29891	0.289454	-0.0340639	-0.102385
VIT_00s0324g00080	0.294673	0.51524	0.0774357	0.0734366	0.324722	0.328334	0.118826	0.275958	0.102612	0.344478	0.1815	0.21018	0.321165	0.207603	0.488351	0.309859	0.378336	0.455587	0.0742946	0.0675832	0.254185	0.0867451	-0.0748399	-0.229369	-0.149466	0.0584077	-0.151762	-0.215024	0.234874	-0.193894	-0.31455	-0.361987	-0.436415	-0.433259	-0.221534	-0.241139	-0.383999	-0.0118115	-0.540911	-0.263991	-0.316756	-0.244914	-0.221796	-0.174324	-0.398578	-0.244067	0.377604	0.176956	0.0595224
VIT_00s0324g00110	0.38109	0.444555	0.123844	0.0904129	0.367459	0.336547	0.268097	0.365438	0.256229	0.297233	0.28902	0.40271	0.35643	0.398274	0.476162	0.425412	0.468514	0.509863	-0.0203661	-0.0208356	0.254707	-0.0170443	-0.115998	-0.142131	-0.134515	-0.173146	-0.0435346	-0.212597	0.154294	-0.161915	-0.336647	-0.314714	-0.445314	-0.401264	-0.363254	-0.322248	-0.327915	-0.132725	-0.515667	-0.361197	-0.465817	-0.0335714	0.0734922	0.0427138	-0.202156	-0.12789	0.0147001	0.415028	0.18398
VIT_00s0327g00020	-0.279083	-0.419319	-0.40084	-0.365027	-0.205159	-0.353604	-0.219804	-0.322039	-0.276148	-0.491903	-0.259057	-0.270333	-0.420575	-0.192854	-0.505553	-0.37692	-0.408422	-0.481999	-0.0724125	-0.275159	-0.371732	-0.167828	0.0100983	0.180687	0.168028	-0.0385567	0.275064	-0.0180226	-0.337178	0.203331	0.372052	0.418288	0.158425	0.179055	0.245647	0.174529	0.411131	0.107389	0.453615	0.396273	0.279347	0.354253	0.252533	-0.0113954	0.415926	0.190965	-0.24069	-0.25459	0.0328888
VIT_00s0332g00010	-0.150282	-0.0815888	0.176208	0.154177	-0.141345	0.203841	0.158705	0.188959	-0.0230298	0.236238	0.0860936	-0.0186606	-0.0621153	-0.203502	0.0503712	0.023305	-0.118136	-0.000466545	0.318178	0.790655	0.345228	0.2851	0.142512	0.202102	-0.168294	-0.0458228	-0.0772947	0.173124	0.371281	0.294706	-0.297277	-0.305182	0.264263	0.097609	0.205511	0.168645	-0.0837501	-0.0947486	0.0871152	-0.105969	0.0980012	-0.341338	-0.124154	0.171445	-0.140627	0.0437963	-0.0917472	-0.0735521	-0.420773
VIT_00s0332g00030	-0.183182	-0.0555689	0.244067	0.197764	-0.214355	0.157415	0.0528436	0.188671	-0.024013	0.280938	0.121824	-0.0171125	-0.0117485	-0.258685	0.086988	0.00324176	-0.0983471	0.0481879	0.31852	0.782486	0.493477	0.439514	0.251216	0.111999	-0.161685	-0.0139634	-0.112129	0.195363	0.344252	0.211956	-0.411842	-0.415821	0.321416	0.185393	0.216606	0.246262	-0.161066	-0.0955505	0.00331875	-0.168585	0.0926641	-0.455148	-0.190858	0.192461	-0.190711	0.0854042	0.00713605	-0.0119673	-0.43727
VIT_00s0332g00060	-0.330211	0.00980743	0.385535	0.0946161	-0.172789	0.3234	0.241003	0.170281	0.0713548	0.432893	0.429756	0.273389	0.0904389	-0.0885106	0.0665587	0.235654	0.105363	0.232252	0.424365	0.884999	0.484078	0.469719	0.518317	0.211871	0.260729	0.233188	-0.157151	0.220523	0.370774	0.352875	-0.352503	-0.148059	0.255122	0.0555878	0.113197	0.378703	-0.180808	-0.179024	-0.152571	-0.390149	-0.0516522	-0.460361	-0.203849	0.464025	0.0722493	0.414118	0.0234455	0.144053	-0.588409
VIT_00s0332g00080	0.17261	0.0390963	0.417944	0.328713	0.13617	0.305696	0.450696	0.431438	0.291201	0.42838	0.380218	0.308919	0.262498	0.233511	0.319722	0.362409	0.213968	0.297262	0.138626	0.600235	0.394631	0.191186	0.107663	0.168138	-0.0366981	-0.0266256	0.0228398	0.214768	0.333013	0.0372332	-0.361059	-0.295059	-0.0242204	-0.111543	-0.19735	-0.130393	-0.361277	-0.400112	-0.192309	-0.386759	-0.279298	-0.2708	-0.0645368	0.249962	-0.162075	0.0403268	-0.281947	-0.0564858	-0.122329
VIT_00s0332g00130	-0.127307	-0.100083	0.129488	-0.0749437	0.119545	0.313685	0.161682	0.217834	0.11067	0.245332	0.317521	0.199723	0.0290549	0.0579387	0.0399992	0.191809	0.0330169	0.12542	0.32694	0.638458	0.341154	0.297288	0.327474	0.131507	0.158236	0.068468	0.0689933	0.0151269	0.167708	0.210185	-0.281096	-0.0943469	0.0253476	-0.148543	0.068513	0.196998	-0.162952	-0.250052	-0.0372011	-0.216463	-0.108798	-0.200376	-0.00238298	0.243711	0.101678	0.266932	-0.107297	0.0312714	-0.161206
VIT_00s0332g00140	-0.225922	-0.138256	0.161197	0.0480166	-0.125544	0.176853	0.153165	0.0948519	-0.0159938	0.12057	0.140514	0.0743573	-0.16092	-0.140029	-0.0707194	0.017906	-0.103739	-0.0236058	0.343596	0.730287	0.309825	0.2619	0.245008	0.188707	-0.00350942	-0.0894073	-0.115667	0.0550108	0.142244	0.240594	-0.25608	-0.14932	0.264821	0.134504	0.157396	0.25776	0.0104095	-0.126125	0.107811	-0.132939	0.0496167	-0.177613	0.0786984	0.312941	0.123748	0.272233	-0.221944	-0.0605159	-0.32072
VIT_00s0332g00160	-0.25577	-0.0979005	0.153226	0.144026	-0.276079	0.0594963	0.0153088	-0.00392876	-0.123112	0.0785523	-0.0143286	-0.0701565	-0.208208	-0.295781	-0.107382	-0.102574	-0.183967	-0.104627	0.293205	0.796423	0.246492	0.228909	0.160289	0.120361	-0.134896	-0.116138	-0.168533	0.174221	0.243239	0.304497	-0.197004	-0.198495	0.390988	0.30373	0.260633	0.289788	0.105893	0.0521814	0.18047	-0.029231	0.229637	-0.223011	0.00752583	0.249404	0.0295644	0.159943	-0.0400875	-0.0645687	-0.441323
VIT_00s0332g00170	0.082666	0.146305	0.45093	0.392448	-0.186404	0.0348809	0.256072	0.1435	0.11239	0.201439	0.338413	0.42319	0.132551	0.217719	0.121552	0.21027	0.226767	0.20837	-0.0574088	0.624698	0.273255	-0.0242823	0.0537814	-0.107813	-0.0542205	-0.375515	0.00882062	0.351751	0.272987	0.265043	-0.277852	-0.198409	0.154506	0.264123	-0.230117	-0.0471599	-0.0071503	-0.149178	-0.115167	-0.366028	-0.143008	0.0200085	0.356308	0.605063	0.190174	0.275334	-0.251615	-0.135144	-0.2965
VIT_00s0333g00020	0.134797	0.361447	0.460171	0.285472	-0.0458464	0.0697013	0.191971	0.0454495	0.144389	0.251124	0.393049	0.464896	0.42623	0.32981	0.248103	0.360114	0.491056	0.480487	-0.0662838	0.204094	0.128562	-0.0516756	0.114494	-0.142536	0.251732	0.0676035	-0.0624059	0.250045	0.0311019	-0.0897131	-0.0638537	0.0478091	-0.0726498	0.074069	-0.405491	-0.0904639	-0.191829	-0.0871192	-0.469057	-0.451687	-0.335811	0.0179674	0.0118993	0.333347	0.0939566	0.178363	0.268162	0.329441	-0.129664
VIT_00s0333g00030	-0.151921	-0.283247	-0.0861311	-0.127056	0.102044	0.0579654	-0.0811555	0.134248	0.185997	0.196258	-0.186808	-0.437159	-0.0737366	-0.315956	0.0899225	-0.0523614	-0.206409	-0.117112	0.0841888	-0.0997297	0.0655283	0.45995	0.148171	0.361097	0.033416	0.610009	-0.197829	-0.236191	-0.125926	-0.276632	-0.00197296	-0.0666925	0.214738	-0.151813	0.21705	0.107865	-0.37097	-0.190879	0.0528819	0.0601119	0.00158832	-0.514657	-0.767613	-0.655798	-0.512304	-0.341965	0.118615	0.117637	0.0913962
VIT_00s0333g00040	0.2481	0.187884	0.769749	0.579106	0.029686	0.200038	0.52919	0.456392	0.610209	0.600829	0.596988	0.613838	0.535961	0.478393	0.488724	0.602976	0.565047	0.519708	-0.209152	0.350439	0.366934	0.165736	0.138477	0.00780547	0.142977	-0.0357992	-0.171552	0.242174	0.233055	-0.0165867	-0.378703	-0.255769	0.108515	0.0518919	-0.573144	-0.273239	-0.453181	-0.503499	-0.424856	-0.738647	-0.545264	-0.278666	-0.0297682	0.474734	-0.0970624	0.16316	-0.275829	0.00948251	-0.196578
VIT_00s0333g00050	-0.713419	-0.437226	-0.529098	-0.425985	-0.594762	-0.385962	-0.554595	-0.447488	-0.625496	-0.350676	-0.498	-0.715957	-0.58775	-0.87999	-0.611957	-0.730518	-0.79076	-0.704102	0.147073	0.0937851	-0.098612	0.304956	0.229301	0.227846	-0.0472901	0.220349	0.077326	0.0908869	0.101463	0.55455	0.214721	0.0966068	0.55954	0.349953	0.870394	0.632649	0.446688	0.464016	0.629388	0.61103	0.795242	-0.272038	-0.303443	-0.223696	0.0278556	0.0607717	0.298633	0.0318698	-0.551282
VIT_00s0333g00060	-0.542666	-0.400645	-0.592161	-0.416637	-0.531981	-0.667636	-0.740142	-0.832613	-0.672983	-0.839061	-0.646594	-0.599439	-0.668802	-0.609607	-0.860712	-0.830775	-0.687665	-0.791127	-0.0586048	-0.332185	-0.577691	-0.251129	-0.00825172	-0.0778746	0.0898185	-0.0624154	0.0891167	0.0168835	-0.48499	0.217137	0.644666	0.578597	0.404769	0.585761	0.589275	0.505085	0.84309	0.650271	0.721748	0.783528	0.78695	0.466543	0.301589	-0.094619	0.555422	0.22724	0.1979	-0.0680572	-0.0654875
VIT_00s0333g00070	-0.215906	-0.281771	-0.804584	-0.452419	-0.207452	-0.50238	-0.522996	-0.4911	-0.601645	-0.722872	-0.801452	-0.753847	-0.565995	-0.5391	-0.536592	-0.706224	-0.662291	-0.693695	-0.174175	-0.510656	-0.574416	-0.329718	-0.373417	0.0888444	-0.303107	-0.137683	0.174411	-0.140091	-0.250587	0.142807	0.545667	0.279068	0.121188	0.173617	0.543313	0.114401	0.587875	0.572851	0.5926	0.836291	0.627798	0.371377	0.0811275	-0.541057	0.0398953	-0.326218	0.116366	-0.0956091	0.133255
VIT_00s0335g00010	-0.401247	-0.378659	-0.238734	-0.240039	-0.0652503	0.117354	-0.08765	-0.0219523	-0.155091	0.0365098	-0.195946	-0.463855	-0.330265	-0.484108	-0.209179	-0.252398	-0.467541	-0.336661	0.41868	0.197461	0.0949286	0.420651	0.281772	0.378547	0.0434633	0.467323	-0.0206035	-0.0545386	0.144607	0.121192	0.00381453	-0.00548197	0.240993	-0.0735006	0.543956	0.387617	-0.0343113	0.00604898	0.328321	0.281824	0.358527	-0.438238	-0.507523	-0.309077	-0.211403	-0.0412073	0.115014	-0.225179	-0.199408
VIT_00s0335g00020	0.0289129	-0.0993111	-0.255204	-0.044073	0.0772946	0.0631883	-0.0418411	0.229721	-0.0395972	0.131014	-0.369189	-0.55519	-0.068537	-0.403892	0.193003	-0.158655	-0.283649	-0.135227	0.108609	-0.0846035	0.139467	0.326721	-0.145241	0.250664	-0.431603	0.238212	-0.100221	-0.182399	0.196817	-0.155798	-0.162065	-0.432503	0.0684152	-0.180689	0.312644	-0.0675217	-0.278034	0.039274	0.0585044	0.244767	0.156564	-0.50412	-0.64664	-0.681932	-0.741478	-0.598333	0.193327	-0.0568456	0.00917529
VIT_00s0335g00080	0.22912	0.204532	-0.00350084	0.141937	0.132416	0.217693	0.104115	0.273071	0.081818	0.218878	-0.118141	-0.133538	0.0283179	-0.0537304	0.344654	0.0992436	0.0674654	0.139206	0.145867	0.115248	0.150656	0.0876998	-0.238421	0.0177627	-0.404776	-0.0572703	-0.143862	-0.146805	0.221917	-0.0936004	-0.215111	-0.425219	-0.0288132	-0.142263	-0.0172693	-0.218847	-0.255125	-0.00116841	-0.173815	-0.0598171	-0.111337	-0.281516	-0.303219	-0.327584	-0.546888	-0.463812	0.0258051	0.0693267	-0.0538396
VIT_00s0335g00090	-0.530797	-0.496204	-0.0904303	-0.365334	0.00444785	0.0491023	-0.230804	-0.317876	-0.0307623	-0.181317	0.0160252	-0.12784	-0.217746	-0.215898	-0.475206	-0.158696	-0.269533	-0.274546	0.387479	0.0583595	-0.11541	0.240908	0.508367	0.181616	0.587419	0.468315	-0.137552	-0.186536	-0.516641	-0.059531	0.294416	0.56527	0.275715	0.114367	0.286654	0.559165	0.191196	-0.0575507	0.329842	0.156695	0.205246	0.0405729	-0.0587739	0.0754692	0.493492	0.517143	-0.0160808	0.0833024	0.0223853
VIT_00s0337g00010	0.350657	0.0276956	-0.0152998	0.213102	0.0552627	-0.360494	-0.0984158	-0.291152	-0.00701745	-0.397785	-0.244183	-0.0279381	-0.0724593	0.281122	-0.112658	-0.100813	0.061718	-0.126581	-0.42685	-0.526221	-0.548618	-0.635485	-0.433732	-0.216715	-0.0392104	-0.22785	0.180542	0.173045	-0.357346	-0.374	0.480881	0.371649	-0.16274	0.223935	-0.311548	-0.341374	0.271544	0.12222	0.104397	0.221938	0.0227029	0.632827	0.370184	-0.0810802	0.19483	-0.167673	-0.12678	-0.319874	0.580989
VIT_00s0337g00030	-0.455194	-0.166151	-0.381341	-0.280725	-0.387836	-0.281259	-0.476423	-0.406548	-0.462457	-0.201845	-0.450254	-0.604044	-0.410176	-0.655594	-0.345301	-0.535239	-0.505294	-0.464901	0.0651325	0.0290337	-0.197925	0.169499	0.0624117	0.0965078	-0.0266043	0.363097	-0.0893283	-0.00232941	0.0344781	0.249249	0.289967	0.126732	0.337137	0.173322	0.580822	0.373968	0.236827	0.411445	0.34157	0.447231	0.534462	-0.259987	-0.466097	-0.446171	-0.17665	-0.173358	0.408129	0.153653	-0.366275
VIT_00s0337g00040	0.382143	0.722142	0.0885353	0.297912	-0.0711947	-0.158763	-0.294975	-0.212606	-0.119567	-0.0750185	-0.154289	0.130839	0.11615	0.17833	0.281044	0.00677545	0.40685	0.277419	-0.216627	-0.174755	-0.218535	-0.415359	-0.458398	-0.69327	-0.269731	-0.305321	-0.289916	-0.081425	-0.0524532	-0.24801	0.110492	-0.139263	-0.210649	0.154556	-0.374139	-0.358916	0.092297	0.433487	-0.450041	-0.0725276	-0.118983	0.22567	0.10236	-0.148907	-0.193488	-0.345124	0.441702	0.0734081	0.0517491
VIT_00s0337g00060	0.136036	-0.0799088	-0.00316102	0.361173	-0.531881	-0.713917	-0.190641	-0.352419	-0.299441	-0.351307	-0.312959	-0.239701	-0.154244	-0.066387	-0.231585	-0.356328	-0.220104	-0.336975	-0.626212	-0.289151	-0.440246	-0.471436	-0.37826	-0.130358	-0.194422	-0.20544	0.545412	0.7721	0.133646	0.187934	0.398934	0.174338	0.17754	0.5622	-0.00223106	-0.193429	0.346356	0.222642	0.237344	0.316828	0.357961	0.313361	0.150246	-0.00217556	0.0377656	-0.225145	0.00515232	-0.323414	-0.00496704
VIT_00s0337g00070	0.289636	0.252199	0.456692	0.22869	0.225771	0.242903	0.357504	0.350605	0.409875	0.396872	0.620238	0.704224	0.504578	0.585667	0.351697	0.50401	0.52309	0.487309	-0.232287	0.168476	0.304182	-0.0116756	0.103173	-0.205574	0.159571	-0.193816	0.129571	0.15899	0.222525	0.0689587	-0.333241	-0.136671	-0.285596	-0.25935	-0.484923	-0.244124	-0.299095	-0.39024	-0.380794	-0.573116	-0.50406	0.0466448	0.304485	0.496871	0.154859	0.253125	-0.211352	-0.0320265	0.0505146
VIT_00s0337g00080	0.160712	-0.0617027	-0.172532	-0.0641106	0.0228494	-0.393307	-0.236761	-0.370331	-0.0404805	-0.412567	-0.265613	-0.124497	-0.0677385	0.151052	-0.236818	-0.210478	-0.0454359	-0.247973	-0.420273	-0.536324	-0.631696	-0.54906	-0.339609	-0.123755	0.112104	-0.0404831	0.217052	0.0473448	-0.414	-0.216766	0.609061	0.514021	-0.101625	0.0941835	-0.150224	-0.22413	0.299002	0.165251	0.222174	0.286761	0.091574	0.567854	0.215265	-0.250911	0.212239	-0.152732	-0.0207469	-0.127917	0.465451
VIT_00s0337g00090	0.61955	0.802599	0.0496959	0.351373	0.0818566	-0.0936157	-0.0247372	0.00977462	-0.0581082	-0.0116905	-0.204521	0.101003	0.248551	0.261534	0.484572	0.145902	0.480848	0.413661	-0.318375	-0.203804	-0.194508	-0.500288	-0.677563	-0.477229	-0.502123	-0.412319	-0.140081	-0.04691	0.0908951	-0.308373	0.0364983	-0.320454	-0.360774	-0.0184702	-0.447758	-0.617341	-0.0537448	0.389279	-0.552159	-0.0870142	-0.242323	0.234977	0.0578219	-0.297141	-0.4446	-0.615517	0.495891	0.204182	0.186637
VIT_00s0338g00010	0.837324	0.636303	0.486664	0.512277	0.512411	0.437071	0.551554	0.672873	0.532624	0.520911	0.465403	0.653818	0.651709	0.744289	0.858012	0.722075	0.793762	0.821043	-0.147414	0.044345	0.410802	-0.124897	-0.348038	-0.32675	-0.369427	-0.439508	0.00892864	-0.0263628	0.289394	-0.377665	-0.5933	-0.648581	-0.594343	-0.407637	-0.775105	-0.736001	-0.600968	-0.387363	-0.79191	-0.639816	-0.785687	-0.0230706	0.167134	0.145235	-0.430012	-0.327356	-0.169156	-0.0390664	0.333174
VIT_00s0338g00020	-0.142033	-0.137305	-0.306775	-0.266832	-0.0453624	0.0117896	-0.204657	0.169541	-0.0609352	0.094166	-0.190213	-0.370828	-0.122667	-0.389469	0.0556837	-0.196683	-0.273859	-0.142521	0.115298	0.0747747	0.248521	0.433193	0.0470144	0.142203	-0.278697	0.118395	0.0486523	-0.216256	0.125762	0.132499	-0.258584	-0.380112	0.136813	-0.159183	0.355115	0.121271	-0.191776	0.012732	0.0858072	0.13762	0.111413	-0.429755	-0.418298	-0.451923	-0.440064	-0.309937	0.071079	0.188303	-0.159396
VIT_00s0338g00030	0.0916289	0.552572	-0.0864668	-0.0363364	-0.221047	-0.241334	-0.401518	-0.407868	-0.356175	-0.285064	0.00985047	0.291783	-0.0351625	0.14949	-0.0918179	-0.143642	0.242419	0.118143	-0.175003	-0.0601475	-0.181601	-0.424012	-0.196177	-0.716934	-0.0299339	-0.46612	0.0454375	0.0442459	-0.0580796	0.188152	0.118106	0.0823322	-0.229447	0.178819	-0.16425	-0.0366082	0.394312	0.485987	-0.24232	0.0109552	0.0334442	0.466798	0.543373	0.283204	0.374185	0.159512	0.294989	0.143859	-0.0978529
VIT_00s0338g00050	0.685803	0.540729	0.495271	0.502668	0.304631	0.203327	0.527374	0.475173	0.463647	0.40878	0.420309	0.60073	0.569194	0.675446	0.670434	0.597777	0.711024	0.672687	-0.348251	-0.0534851	0.241426	-0.195783	-0.287943	-0.205494	-0.22368	-0.343472	0.0492289	0.128158	0.23692	-0.312031	-0.380321	-0.409293	-0.449528	-0.244301	-0.724188	-0.648195	-0.44014	-0.297793	-0.627337	-0.556974	-0.637393	0.065476	0.186419	0.231366	-0.259996	-0.197043	-0.0924033	0.00568541	0.285938
VIT_00s0340g00040	-0.328367	-0.154704	-0.737195	-0.312002	-0.499712	-0.587377	-0.682067	-0.609345	-0.811197	-0.696461	-0.836111	-0.814466	-0.707823	-0.746902	-0.584631	-0.865148	-0.747329	-0.745083	-0.09727	-0.291831	-0.440421	-0.238571	-0.310868	-0.109667	-0.435585	-0.199065	0.135963	0.0638797	0.0174628	0.324981	0.407771	0.0895715	0.246573	0.396753	0.703827	0.278913	0.682225	0.763418	0.592994	0.867301	0.855231	0.195517	0.0442356	-0.421363	-0.00379441	-0.282306	0.363157	-0.109254	-0.16839
VIT_00s0340g00050	-0.493652	-0.530761	-0.380947	-0.142345	-0.608764	-0.702959	-0.490603	-0.700756	-0.495297	-0.658534	-0.652985	-0.675365	-0.717072	-0.596566	-0.785241	-0.765452	-0.737063	-0.881014	-0.211781	-0.21328	-0.683219	-0.293698	-0.100181	0.220962	0.0552014	0.0922904	0.113683	0.270643	-0.243268	0.292249	0.764922	0.609861	0.617291	0.648731	0.540395	0.356596	0.740454	0.477256	0.882453	0.726805	0.811404	0.300022	0.0506946	-0.170474	0.338723	0.0389669	0.0359823	-0.236202	-0.184755
VIT_00s0340g00060	-0.669432	-0.572538	-0.293015	-0.229149	-0.515045	-0.387261	-0.402982	-0.558829	-0.41126	-0.460262	-0.487989	-0.608411	-0.714552	-0.680517	-0.727095	-0.646524	-0.714528	-0.763785	0.19426	0.0538515	-0.387286	0.0457999	0.196137	0.319751	0.177106	0.259855	-0.115971	0.0662192	-0.229493	0.269468	0.524863	0.487389	0.686259	0.538573	0.636374	0.571776	0.577392	0.354487	0.81074	0.569662	0.733064	0.0225357	-0.104384	-0.0721008	0.31693	0.221	0.0863981	-0.161961	-0.343752
VIT_00s0340g00070	-0.0466692	-0.13446	0.0234649	-0.196547	0.298353	0.289074	0.189424	0.336566	0.305946	0.423275	0.249279	-0.0111093	0.196761	0.0277962	0.251989	0.231464	0.0614145	0.161654	0.0844228	-0.0157823	0.257581	0.462444	0.287086	0.309011	0.225241	0.573778	0.0238643	-0.203415	0.0869698	-0.118218	-0.19723	-0.0980531	-0.130232	-0.509288	0.0290786	0.00942458	-0.538699	-0.394725	-0.168829	-0.211766	-0.263487	-0.505	-0.598742	-0.342655	-0.363832	-0.114967	0.0803209	0.186242	0.0613762
VIT_00s0340g00080	-0.159619	-0.264306	-0.523922	-0.338089	0.14434	-0.0291274	-0.314653	-0.236506	-0.21993	-0.376671	-0.583656	-0.629907	-0.466022	-0.407825	-0.277668	-0.364257	-0.441144	-0.407988	0.266376	-0.354567	-0.307847	-0.00735382	-0.115795	0.152693	-0.143299	0.208978	-0.202984	-0.423072	-0.348967	-0.29305	0.288574	0.173171	0.0489746	-0.0199418	0.393574	0.182228	0.199596	0.257012	0.339464	0.550524	0.353645	0.0463865	-0.225894	-0.604629	-0.132023	-0.276242	0.0861315	-0.100332	0.308762
VIT_00s0340g00090	-0.383461	-0.232049	-0.34761	-0.156704	-0.427284	-0.442527	-0.363228	-0.504257	-0.471266	-0.494645	-0.531331	-0.529766	-0.602743	-0.52672	-0.545884	-0.573099	-0.54852	-0.57097	-0.0175155	-0.073812	-0.361793	-0.160931	-0.056772	0.114796	-0.0737591	0.0232366	-0.0303131	0.112559	-0.130743	0.169199	0.393788	0.304473	0.353146	0.437828	0.471041	0.356219	0.51895	0.430614	0.509787	0.517579	0.610213	0.167479	0.0415267	-0.16639	0.201854	0.0086014	0.143648	-0.0856859	-0.128705
VIT_00s0341g00010	-0.588283	-0.31067	-0.366613	-0.461219	-0.29913	-0.280746	-0.514241	-0.588787	-0.354615	-0.472735	-0.236244	-0.246784	-0.490518	-0.382487	-0.658787	-0.474362	-0.412934	-0.501808	0.191883	-0.133082	-0.32124	0.00599889	0.295788	-0.0231062	0.406876	0.166898	-0.105165	-0.218632	-0.487816	0.190097	0.438961	0.572671	0.325462	0.300068	0.417007	0.573938	0.564677	0.373551	0.462675	0.404236	0.459749	0.222073	0.167919	0.0791057	0.586047	0.45484	0.0946385	0.138076	-0.15803
VIT_00s0341g00020	0.479888	0.0823077	0.218268	0.214483	0.548896	0.279157	0.315174	0.378997	0.582371	0.307912	0.0632223	0.0800509	0.305532	0.401754	0.470121	0.429667	0.351897	0.294107	-0.126287	-0.172518	-0.0913046	-0.0608221	-0.242309	0.134978	-0.0588314	0.203005	-0.148454	-0.235151	-0.139417	-0.557326	0.00295295	-0.0617651	-0.251833	-0.372368	-0.45952	-0.499984	-0.468711	-0.373839	-0.271238	-0.23867	-0.476358	-0.0604946	-0.30048	-0.436395	-0.431298	-0.44525	-0.239526	-0.0976242	0.537038
VIT_00s0341g00030	-0.488656	-0.286402	-0.37263	-0.335203	-0.477603	-0.496111	-0.440764	-0.579153	-0.549269	-0.526282	-0.18518	-0.190724	-0.392436	-0.307252	-0.689861	-0.528226	-0.477514	-0.544118	-0.133007	-0.0986113	-0.319184	-0.170453	0.185667	-0.0805855	0.284771	-0.0327952	0.334332	0.272904	-0.0970093	0.502252	0.383569	0.503339	0.18186	0.357085	0.42539	0.464454	0.627725	0.352616	0.474917	0.434978	0.561286	0.326145	0.371635	0.273133	0.645975	0.459581	0.0312178	-0.0454126	-0.232795
VIT_00s0341g00040	-0.349089	-0.318854	-0.212235	-0.471531	0.150782	0.172464	-0.0628812	-0.120696	-0.163698	-0.255742	0.230348	0.199149	-0.133681	0.0151775	-0.423521	-0.0706737	-0.193901	-0.125919	0.338346	0.0695524	0.20617	0.1327	0.470607	0.0329665	0.357403	-0.125522	0.158655	-0.167164	-0.256098	0.130132	-0.116455	0.268691	-0.118344	-0.103247	0.238277	0.480947	0.243403	-0.080283	0.245155	0.0802487	0.0952779	0.286519	0.569216	0.53759	0.731854	0.731906	-0.191299	0.119577	0.138924
VIT_00s0341g00050	0.334734	0.475999	0.0375474	-0.0287226	0.465745	0.270304	0.0936801	0.028786	0.138091	0.0632782	0.114648	0.298739	0.336757	0.39587	0.280565	0.324129	0.457396	0.418631	-0.0375849	-0.186991	-0.0876052	-0.273159	-0.173027	-0.258412	0.0341634	-0.0532688	-0.189757	-0.269872	-0.126077	-0.360057	0.0319335	0.0633834	-0.518859	-0.376623	-0.357899	-0.254415	-0.121389	0.0738272	-0.431694	-0.182443	-0.333932	0.266378	0.140439	-0.0889297	0.00160186	-0.0918498	0.271727	0.12378	0.424598
VIT_00s0341g00060	0.265837	0.376897	0.590043	0.322215	0.416654	0.567482	0.377622	0.286309	0.472239	0.409407	0.53692	0.651664	0.499488	0.538449	0.4485	0.631536	0.679887	0.673205	0.371357	0.249266	0.333581	0.0743804	0.190437	-0.197522	0.267778	-0.00122642	-0.459036	-0.242034	-0.168786	-0.489488	-0.29059	-0.0958905	-0.236614	-0.15698	-0.558214	-0.139998	-0.359087	-0.287243	-0.579269	-0.614216	-0.587753	-0.025069	0.113607	0.421527	0.0827975	0.277429	0.0578664	0.126577	0.167078
VIT_00s0341g00070	-0.651118	-0.301261	-0.215391	-0.131096	-0.70385	-0.552664	-0.569574	-0.767006	-0.594487	-0.520801	-0.422581	-0.455	-0.545208	-0.627442	-0.753691	-0.669092	-0.573189	-0.63943	0.0338928	0.034282	-0.392906	-0.0870133	0.19874	-0.00863872	0.227796	0.154086	-0.0430256	0.321375	-0.170194	0.35587	0.531162	0.520046	0.600926	0.711856	0.561747	0.634349	0.70115	0.557419	0.57639	0.507944	0.781909	0.142274	0.0477635	0.12293	0.46747	0.33708	0.37139	-0.0250563	-0.419549
VIT_00s0341g00080	-0.785124	-0.388759	-0.343365	-0.393779	-0.524543	-0.302361	-0.530399	-0.519006	-0.522939	-0.243683	-0.305858	-0.54133	-0.454793	-0.758146	-0.619019	-0.609441	-0.652005	-0.587083	0.18838	0.146919	-0.0952233	0.330575	0.423821	0.163854	0.248964	0.458085	-0.0318703	0.11995	0.0405888	0.451339	0.272141	0.307347	0.505033	0.301059	0.775254	0.749145	0.376102	0.373	0.520159	0.435131	0.714776	-0.278661	-0.336027	-0.121303	0.184512	0.268178	0.446735	0.190702	-0.510262
VIT_00s0344g00020	-0.592122	-0.593543	-0.462932	-0.337243	-0.36186	-0.40127	-0.533334	-0.513435	-0.361108	-0.436354	-0.645185	-0.820584	-0.59889	-0.740858	-0.634987	-0.675982	-0.759344	-0.789229	0.0777764	-0.195539	-0.439054	0.107443	0.0938545	0.327594	0.0870389	0.425957	-0.126432	-0.0736864	-0.30439	0.108031	0.579198	0.445355	0.600527	0.370756	0.680289	0.489031	0.440621	0.363806	0.761261	0.676569	0.72092	-0.0825544	-0.387453	-0.488089	0.0278608	-0.0865429	0.127896	-0.0306999	-0.151807
VIT_00s0346g00040	0.153097	0.235676	-0.244592	0.105794	-0.206706	-0.274375	-0.247778	-0.109631	-0.327607	-0.103684	-0.521099	-0.491592	-0.154007	-0.352657	0.13326	-0.301853	-0.163055	-0.142954	-0.252827	-0.18509	-0.209858	-0.144069	-0.490453	-0.0796207	-0.53846	-0.0809085	-0.0637517	0.0432809	0.211483	0.0216829	0.15823	-0.295657	0.0952698	0.104102	0.172351	-0.260873	0.0441006	0.416936	-0.00374968	0.321454	0.235846	-0.134974	-0.391891	-0.593594	-0.620164	-0.698299	0.47417	-0.0546233	-0.127571
VIT_00s0346g00080	-0.850629	-0.561865	-0.453306	-0.477653	-0.578356	-0.408639	-0.551418	-0.562729	-0.522395	-0.361402	-0.43698	-0.6888	-0.593347	-0.836248	-0.732069	-0.702717	-0.78792	-0.755097	0.150378	0.0113973	-0.241408	0.305483	0.383276	0.327388	0.274568	0.497568	-0.0220477	0.057853	-0.108293	0.452447	0.427988	0.42473	0.645991	0.37069	0.837024	0.753547	0.458634	0.380251	0.702623	0.567003	0.778529	-0.237168	-0.382689	-0.222364	0.197415	0.219013	0.293477	0.0657216	-0.499356
VIT_00s0346g00090	-0.444254	-0.374987	-0.577343	-0.397456	-0.348829	-0.343039	-0.408353	-0.261803	-0.486326	-0.344347	-0.607449	-0.760971	-0.481227	-0.763714	-0.402417	-0.62666	-0.692455	-0.591741	-0.0196488	-0.14303	-0.116084	0.197943	-0.033831	0.282782	-0.297811	0.0924011	0.0106692	-0.0861283	0.0314567	0.288813	0.159889	-0.0516278	0.400382	0.169169	0.724019	0.345966	0.281863	0.371817	0.544346	0.589937	0.606532	-0.190364	-0.306007	-0.47263	-0.206854	-0.245178	0.290375	0.0232334	-0.247456
VIT_00s0346g00110	-0.531824	-0.196344	0.296216	-0.144165	-0.136687	0.199278	0.167003	0.0113253	0.127663	0.3421	0.48888	0.259489	0.119001	-0.0519685	-0.147049	0.194703	0.0261856	0.0878009	0.262481	0.367808	0.27821	0.479782	0.739907	0.316851	0.713631	0.606846	-0.104029	0.144262	0.0848552	0.273646	-0.0579684	0.295036	0.248995	-0.0378455	0.150699	0.532085	-0.142444	-0.247005	-0.0247507	-0.334333	-0.0254106	-0.40104	-0.298397	0.422507	0.305537	0.635419	0.118373	0.171727	-0.445975
VIT_00s0347g00030	0.362378	0.361075	0.393592	0.451463	0.182343	0.223735	0.376168	0.245593	0.267033	0.26749	0.176834	0.292387	0.351042	0.323399	0.388216	0.404913	0.429291	0.421501	0.0058973	0.0736732	0.124431	-0.110137	-0.128759	-0.037482	-0.105058	-0.10725	-0.211219	0.10157	0.139292	-0.29087	-0.157021	-0.206826	-0.153256	0.0199064	-0.38826	-0.280444	-0.201385	-0.0474279	-0.386947	-0.304137	-0.275788	-0.0323972	0.00445509	0.183129	-0.187578	-0.100196	0.0557461	-0.0215146	0.129012
VIT_00s0347g00040	-0.315309	-0.133918	-0.401314	-0.226031	-0.299693	-0.202315	-0.27919	-0.400109	-0.512195	-0.455264	-0.355743	-0.290136	-0.53947	-0.373783	-0.491579	-0.467646	-0.442994	-0.462365	0.189136	0.101782	-0.21672	-0.181662	-0.0492342	-0.0219979	-0.152325	-0.272389	0.0694605	0.0610544	0.0717126	0.38683	0.208281	0.160045	0.154699	0.269206	0.451442	0.328326	0.611894	0.466281	0.46843	0.492061	0.569946	0.252511	0.340078	0.14598	0.342036	0.16818	-0.0361227	-0.210865	-0.218696
VIT_00s0347g00050	0.20392	0.0116339	-0.121708	0.0292029	0.124352	-0.209978	-0.0424749	-0.277186	0.00546884	-0.376683	-0.262386	-0.0732351	-0.0901673	0.218931	-0.14418	-0.0338887	0.0701244	-0.100819	-0.205852	-0.460884	-0.601055	-0.548193	-0.345781	-0.0579557	0.0660118	-0.0661774	0.020554	-0.0604449	-0.437605	-0.30738	0.548032	0.48744	-0.0964177	0.123613	-0.246292	-0.245794	0.286685	0.169579	0.0925518	0.221094	0.00962087	0.576053	0.253309	-0.161839	0.225281	-0.118967	-0.0041909	-0.0862013	0.443705
VIT_00s0347g00060	0.393071	0.159799	-0.0560782	0.223202	0.222575	0.16607	0.117555	0.448859	0.155922	0.255249	-0.281041	-0.327333	0.104181	-0.127846	0.510105	0.081231	0.0278609	0.150509	0.00886355	-0.033552	0.207888	0.170703	-0.398045	0.0949678	-0.663371	-0.0537282	-0.162026	-0.203117	0.247285	-0.30923	-0.308123	-0.664355	-0.0693785	-0.212565	-0.0244621	-0.414269	-0.426815	-0.0469631	-0.189107	0.0312668	-0.132185	-0.40969	-0.510536	-0.638184	-0.895336	-0.791162	0.0776742	-0.0330352	0.122465
VIT_00s0347g00070	0.196435	-0.00887374	0.207862	0.0303452	0.601227	0.662191	0.393828	0.681301	0.563769	0.633629	0.282229	0.0656967	0.400534	0.145639	0.576062	0.508849	0.251	0.43002	0.356512	0.163524	0.514047	0.571726	0.199787	0.305408	-0.0416685	0.442447	-0.27896	-0.403009	0.127413	-0.425984	-0.499104	-0.439334	-0.192478	-0.601434	-0.136777	-0.144032	-0.792109	-0.54748	-0.362236	-0.39389	-0.483127	-0.63647	-0.644624	-0.377034	-0.636586	-0.287992	-0.0544273	0.168867	0.204743
VIT_00s0347g00080	0.0698135	-0.234102	0.0361899	-0.15438	0.582085	0.550086	0.25741	0.550817	0.442627	0.364803	0.18802	-0.0103905	0.281503	0.0502851	0.324087	0.319699	0.0551531	0.245331	0.375595	0.0491006	0.518606	0.563249	0.273714	0.290501	-0.0429168	0.277714	-0.16857	-0.454341	-0.0967478	-0.4549	-0.489864	-0.349204	-0.174661	-0.511914	0.0163957	0.0193299	-0.593345	-0.498011	-0.136366	-0.200306	-0.332265	-0.414962	-0.343928	-0.256313	-0.349982	-0.0860053	-0.121181	0.0954061	0.360358
VIT_00s0347g00110	-0.202225	-0.196348	0.183947	-0.104225	0.235792	0.607992	0.193144	0.45594	0.26618	0.486976	0.408492	0.155829	0.102875	-0.0901964	0.201035	0.262195	0.00447109	0.22947	0.663938	0.545622	0.767619	0.770584	0.558623	0.163391	0.0686298	0.220335	-0.154262	-0.224168	0.210722	0.0179793	-0.71475	-0.462523	0.0218033	-0.294411	0.185088	0.349804	-0.467624	-0.463085	-0.151752	-0.340893	-0.201894	-0.624719	-0.257989	0.183022	-0.152166	0.273262	-0.231886	0.0390507	-0.186337
VIT_00s0347g00120	-0.168658	-0.226084	0.150045	-0.0833382	0.222663	0.460152	0.199293	0.509623	0.347287	0.540481	0.263855	-0.0396288	0.197049	-0.168258	0.301374	0.264857	-0.0101043	0.21541	0.384033	0.297928	0.654588	0.805179	0.455017	0.321368	0.0364413	0.432715	-0.24053	-0.265342	0.141532	-0.0902955	-0.584262	-0.451172	0.123959	-0.30574	0.153324	0.214611	-0.616503	-0.475393	-0.188348	-0.315957	-0.246769	-0.763053	-0.606169	-0.16616	-0.439378	-0.00734605	-0.115699	0.212415	-0.150393
VIT_00s0349g00020	-0.674206	-0.62519	-0.759322	-0.770972	-0.196413	-0.270145	-0.591039	-0.499186	-0.482572	-0.56202	-0.510902	-0.689939	-0.658645	-0.690046	-0.758603	-0.695012	-0.802747	-0.763558	0.23134	-0.220786	-0.29029	0.180817	0.258263	0.260869	0.167954	0.291289	0.130817	-0.268793	-0.343017	0.256635	0.366266	0.431779	0.27254	0.0598313	0.803545	0.651026	0.479211	0.312008	0.724342	0.703244	0.66256	0.0687969	-0.0797474	-0.371615	0.317156	0.173729	0.0460363	0.0102001	-0.0155941
VIT_00s0349g00030	-0.151926	-0.162552	0.102743	-0.378311	0.326822	0.368711	0.254657	0.220337	0.267734	0.243502	0.693977	0.55675	0.320427	0.414979	-0.0226838	0.374406	0.216408	0.263549	0.214041	0.135152	0.301998	0.264031	0.574886	0.0816162	0.67879	0.266098	0.330223	-0.0676482	-0.063655	0.142676	-0.228899	0.250955	-0.350616	-0.501326	-0.133635	0.206281	-0.253875	-0.51244	-0.181395	-0.387312	-0.386375	0.00322456	0.188747	0.453758	0.497085	0.646536	-0.266799	0.133261	0.0749799
VIT_00s0349g00040	-0.317691	-0.0214599	-0.577652	-0.335881	-0.373832	-0.413435	-0.518579	-0.565911	-0.671338	-0.582457	-0.601637	-0.532525	-0.464003	-0.549947	-0.492814	-0.631017	-0.469809	-0.488859	0.0130738	-0.257848	-0.37861	-0.225029	-0.166209	-0.0986429	-0.20476	-0.13121	-0.0416266	-0.0642749	-0.140819	0.199055	0.392098	0.191558	0.136681	0.310281	0.50305	0.28254	0.621748	0.73051	0.387737	0.667343	0.644544	0.25872	0.111486	-0.204176	0.160124	-0.0620533	0.344658	-0.0524813	-0.154233
VIT_00s0349g00060	0.351202	0.173093	0.659923	0.400363	0.411648	0.582239	0.603553	0.598628	0.612141	0.661556	0.766799	0.7348	0.531652	0.662554	0.537821	0.724947	0.578637	0.605256	0.155245	0.391131	0.482712	0.183508	0.226902	-0.0550838	0.213813	0.0214517	0.0247503	0.138535	0.341637	-0.0800036	-0.506753	-0.256931	-0.298506	-0.352421	-0.546175	-0.262259	-0.565848	-0.686449	-0.489996	-0.732745	-0.644179	-0.234385	0.0479014	0.496218	-0.0453613	0.227487	-0.448933	-0.167079	0.0417376
VIT_00s0352g00020	-0.259199	-0.338202	-0.42619	-0.27919	-0.292349	-0.371659	-0.340262	-0.33492	-0.356187	-0.451316	-0.454379	-0.47415	-0.53769	-0.409146	-0.43328	-0.489339	-0.486387	-0.516547	-0.0798099	-0.216117	-0.34548	-0.104691	-0.125154	0.107612	-0.0964297	-0.0626938	0.124484	-0.0429677	-0.19967	0.212575	0.331292	0.201041	0.306294	0.26475	0.367415	0.152342	0.387284	0.258935	0.474841	0.479221	0.39333	0.179788	0.0459664	-0.231516	0.118499	-0.0752126	-0.0436525	-0.129424	-0.0855463
VIT_00s0353g00050	0.070486	-0.210394	0.110291	0.111651	0.0673095	0.0118507	0.520381	0.108686	0.119084	-0.122213	0.104297	0.170108	-0.0759537	0.240186	-0.130471	0.170919	-0.00236418	-0.0315974	-0.0230539	-0.0172132	-0.0914735	-0.241117	3.83668e-05	0.446076	0.104085	-0.17367	0.188413	0.183377	-0.0531208	-0.0244485	0.0725154	0.235183	-0.0127789	0.0679176	-0.145802	-0.06414	0.132939	-0.198124	0.180599	-0.0221017	-0.0487665	0.315182	0.402468	0.400619	0.362882	0.265975	-0.353902	-0.181179	0.174317
VIT_00s0353g00060	-0.166113	-0.401906	-0.0350693	-0.132547	0.151479	0.123197	0.329831	0.0506382	0.0629176	-0.183644	0.0380182	0.027242	-0.0993572	0.0448308	-0.262375	0.0902247	-0.140362	-0.118194	0.248604	0.00179557	-0.0216277	-0.0133766	0.22558	0.521863	0.246232	0.00732086	-0.0278275	-0.0992939	-0.33672	-0.118337	0.115449	0.330466	0.109595	0.0780625	0.0513331	0.189214	0.166568	-0.138528	0.297766	0.109301	0.0323095	0.242103	0.291002	0.344395	0.436667	0.408581	-0.360683	-0.0843557	0.173029
VIT_00s0357g00010	-0.0271534	0.434366	-0.0495442	0.0707578	-0.397341	-0.510585	-0.529299	-0.705866	-0.440977	-0.445327	-0.202468	0.0643658	-0.111474	0.0174779	-0.279049	-0.324867	0.110028	-0.0913438	-0.326541	-0.196169	-0.509445	-0.563213	-0.232919	-0.631369	0.126823	-0.210868	-0.0520942	0.176871	-0.258513	0.0268092	0.521063	0.41778	-0.0147783	0.43601	-0.118373	0.0187811	0.538316	0.622263	-0.0735974	0.177666	0.239009	0.537374	0.373621	0.117622	0.403129	0.111345	0.546451	0.161391	-0.0501484
VIT_00s0357g00020	-0.479827	-0.128364	-0.223026	0.0492863	-0.884826	-0.758467	-0.548209	-0.703145	-0.703104	-0.525164	-0.559338	-0.542284	-0.470419	-0.687035	-0.604729	-0.74177	-0.560627	-0.609269	-0.24107	0.000743783	-0.36132	-0.185063	-0.0822218	-0.0738247	-0.138108	-0.104689	0.0374328	0.488072	0.0444825	0.440692	0.448376	0.225587	0.62748	0.829558	0.53408	0.40329	0.683762	0.693038	0.503513	0.543719	0.810388	0.113053	0.0353354	0.0405558	0.196737	0.045985	0.483327	0.0229693	-0.53123
VIT_00s0357g00060	0.350175	0.285716	0.260705	0.243741	0.269958	0.317678	0.29864	0.44423	0.225984	0.369567	0.302916	0.325361	0.39601	0.301145	0.495797	0.373778	0.365514	0.443114	0.0353708	0.101818	0.413513	0.139051	-0.0360076	-0.13997	-0.197663	-0.165255	-0.0718773	-0.0828989	0.215346	-0.169187	-0.475609	-0.477591	-0.296083	-0.26555	-0.320019	-0.308587	-0.420389	-0.271925	-0.441015	-0.356102	-0.410946	-0.204579	-0.00518294	0.128346	-0.298768	-0.100254	-0.0786609	-0.0920129	0.0289632
VIT_00s0357g00070	-0.591875	-0.292032	-0.396992	-0.406212	-0.481512	-0.428392	-0.52215	-0.575491	-0.534102	-0.454599	-0.398366	-0.488045	-0.374722	-0.608539	-0.622745	-0.622005	-0.546586	-0.55151	0.0137598	-0.0480415	-0.258608	0.0458179	0.18821	0.0953563	0.146178	0.184189	0.0202117	0.0893189	-0.174775	0.286218	0.389471	0.374346	0.393153	0.346273	0.604212	0.556266	0.498478	0.461884	0.508722	0.496563	0.638183	0.0821014	-0.056704	-0.110012	0.29566	0.192996	0.366519	0.0592908	-0.267916
VIT_00s0357g00080	-0.057668	0.0907811	0.006432	-0.00620107	0.0708394	0.0544012	-0.146741	-0.129851	-0.0724503	0.00993657	-0.0329284	-0.0442449	-0.0459763	-0.0835664	-0.0177089	-0.0610277	0.0104162	0.0282233	0.10481	0.0394894	0.0483907	0.0528802	0.0936636	-0.131943	0.00110244	0.126692	-0.170104	-0.0640788	-0.0224313	-0.15628	-0.0126846	0.020798	-0.0953304	-0.0335911	0.0707951	0.13547	-0.00978663	0.104853	-0.0359596	0.0339727	0.078465	-0.0461768	-0.060031	-0.0778162	-0.000545341	0.0340183	0.246379	0.250382	0.0670713
VIT_00s0357g00090	-0.70477	-0.653037	-0.520072	-0.469297	-0.502674	-0.52907	-0.607079	-0.689543	-0.541599	-0.680523	-0.548025	-0.647243	-0.695038	-0.70084	-0.88829	-0.782235	-0.799676	-0.849434	0.0821773	-0.204244	-0.419575	0.0134875	0.222418	0.184935	0.210786	0.166643	0.042494	0.00763818	-0.44625	0.253327	0.537401	0.569268	0.548519	0.517445	0.699232	0.654599	0.693289	0.413942	0.827202	0.717645	0.77929	0.223182	0.0941715	-0.0946114	0.514523	0.317566	0.00168866	-0.161982	-0.146874
VIT_00s0357g00100	-0.443535	-0.305779	-0.45041	-0.0912824	-0.792371	-0.725647	-0.432997	-0.605596	-0.757512	-0.651717	-0.620797	-0.605922	-0.681792	-0.666483	-0.708068	-0.799412	-0.743736	-0.78312	-0.214266	-0.0718722	-0.410601	-0.273781	-0.161489	0.085319	-0.255176	-0.270881	0.280029	0.46584	0.147883	0.593945	0.425769	0.220138	0.507228	0.697568	0.636057	0.352971	0.791219	0.630887	0.727693	0.71853	0.888812	0.237203	0.23953	0.0798085	0.282624	0.0477938	0.110034	-0.215534	-0.445862
VIT_00s0358g00010	-0.175136	-0.284429	-0.266319	-0.415671	0.145484	-0.0509517	-0.226711	-0.236686	-0.000906364	-0.263418	0.00940292	-0.024919	-0.170749	0.08056	-0.328067	-0.109207	-0.129693	-0.214785	0.0843032	-0.306939	-0.32481	-0.0775353	0.157466	0.00801528	0.457216	0.231002	0.218284	-0.221732	-0.441835	-0.0317628	0.357997	0.53149	-0.0685019	-0.133594	0.0430763	0.15029	0.167484	-0.0565002	0.197684	0.165203	0.00877784	0.294057	0.126255	-0.0822494	0.406648	0.246383	-0.10291	0.124339	0.255367
VIT_00s0360g00010	0.231768	-0.0596039	0.650761	0.306188	0.530155	0.561324	0.492781	0.44942	0.811769	0.546155	0.590096	0.551933	0.432818	0.577587	0.410519	0.665461	0.525497	0.468417	0.242995	0.240928	0.268469	0.221723	0.277445	0.112012	0.407952	0.268638	-0.312141	-0.220841	-0.218522	-0.487533	-0.206642	0.0461617	-0.0572884	-0.264554	-0.555531	-0.181647	-0.526694	-0.67648	-0.283597	-0.630376	-0.643752	-0.165217	-0.0887869	0.244123	0.00878375	0.221902	-0.417234	-0.0251538	0.28744
VIT_00s0360g00020	0.473076	0.0208317	0.669421	0.530772	0.410798	0.233356	0.418588	0.37239	0.817354	0.40595	0.382105	0.459512	0.491746	0.636674	0.462834	0.576764	0.556426	0.409605	-0.213693	-0.063799	0.0376427	-0.0650447	-0.074865	-0.0338447	0.16998	0.0498033	-0.226663	-0.0577396	-0.271626	-0.59385	-0.0587331	0.0170463	-0.0271018	-0.0649477	-0.720098	-0.466702	-0.448411	-0.57507	-0.278025	-0.541423	-0.619136	0.0273905	-0.00123114	0.0964351	-0.11663	-0.0624786	-0.404539	-0.126181	0.460635
VIT_00s0360g00040	0.253784	-0.0403908	-0.218801	-0.194902	0.482495	0.259183	0.0799634	0.306677	0.147152	0.112994	-0.0428226	-0.118527	0.0826322	0.0963909	0.241622	0.108817	0.0124671	0.0912016	0.0487816	-0.198844	0.0886078	0.0960807	-0.130216	0.0658759	-0.193771	0.101309	0.0859559	-0.296326	0.0116348	-0.262681	-0.144401	-0.196308	-0.375787	-0.521771	-0.0102282	-0.22923	-0.327049	-0.214446	-0.08873	0.0544429	-0.192226	-0.0971394	-0.225066	-0.473629	-0.361347	-0.374858	-0.0837714	-0.0405968	0.415362
VIT_00s0360g00050	0.0418666	-0.0412704	0.120626	-0.134743	0.436793	0.620925	0.35111	0.656964	0.347721	0.563129	0.456998	0.231756	0.231979	0.0928312	0.422462	0.398744	0.147857	0.388229	0.400257	0.329662	0.79341	0.685528	0.391842	0.184926	-0.0614909	0.139853	-0.0285372	-0.292091	0.293302	-0.0541951	-0.80088	-0.597233	-0.239182	-0.574459	0.0199049	0.0668647	-0.660689	-0.55161	-0.326801	-0.418723	-0.418991	-0.59512	-0.274321	0.0354001	-0.337966	0.0641176	-0.175571	0.184471	0.0107954
VIT_00s0361g00040	-0.13553	0.239562	-0.524163	-0.138711	-0.573684	-0.598748	-0.510182	-0.647237	-0.860164	-0.70514	-0.582474	-0.352187	-0.605128	-0.39298	-0.485369	-0.652508	-0.377585	-0.439907	-0.210334	-0.191046	-0.479601	-0.577104	-0.420859	-0.333628	-0.381859	-0.527895	0.221373	0.267291	0.109733	0.456348	0.405558	0.146747	0.0448239	0.468628	0.35837	0.0965499	0.794675	0.839574	0.299631	0.621599	0.636589	0.527639	0.470199	0.0286124	0.288945	-0.0824987	0.367916	-0.0794509	-0.272131
VIT_00s0361g00050	0.129298	-0.17148	-0.392571	0.000938439	-0.101625	-0.306004	-0.199472	-0.071071	-0.251334	-0.374443	-0.622969	-0.572706	-0.272352	-0.346642	-0.0960914	-0.410489	-0.391925	-0.367812	-0.153422	-0.318934	-0.215509	-0.182123	-0.468788	0.0955212	-0.587901	-0.265947	0.0653659	-0.0530248	-0.0663091	-0.157353	0.124004	-0.198814	0.0634309	0.163278	0.242361	-0.179924	0.191481	0.245831	0.320969	0.508811	0.318127	0.133593	-0.0133766	-0.490331	-0.325056	-0.531234	-0.0922904	-0.26291	0.223181
VIT_00s0361g00080	0.291071	-0.0320053	0.402126	0.224791	0.429645	0.320499	0.225346	0.440883	0.734278	0.5086	0.261283	0.192301	0.452758	0.323787	0.469172	0.423803	0.351135	0.29674	-0.117967	0.0110672	0.168765	0.237349	0.00468594	0.0421522	0.0504537	0.240139	-0.28123	-0.272765	-0.09862	-0.419208	-0.195671	-0.185069	-0.00831217	-0.313702	-0.391013	-0.309901	-0.57086	-0.523308	-0.220061	-0.44072	-0.495068	-0.31215	-0.365879	-0.281754	-0.414108	-0.25464	-0.300309	0.0511792	0.309771
VIT_00s0361g00100	-0.0823587	-0.0389565	0.385984	0.00653728	0.439154	0.800231	0.378326	0.489551	0.488679	0.569521	0.510853	0.371247	0.239574	0.163666	0.316511	0.50296	0.27518	0.405764	0.707269	0.539501	0.598474	0.571088	0.489956	0.187178	0.238396	0.249562	-0.435447	-0.397276	0.0674632	-0.170702	-0.522628	-0.262591	0.0128079	-0.368455	-0.0900121	0.197577	-0.482578	-0.486433	-0.241989	-0.514567	-0.401168	-0.478362	-0.217011	0.245493	-0.0833674	0.301576	-0.17435	-0.00099159	-0.0887657
VIT_00s0361g00110	0.284484	0.199359	0.0105903	0.0627546	0.218295	0.00578949	0.0915998	0.0432139	0.218457	0.0630457	-0.101546	0.0095228	0.0896275	0.218605	0.188657	0.151785	0.207602	0.084571	-0.318968	-0.157084	-0.338188	-0.334286	-0.370754	-0.00493954	-0.1058	-0.00586663	-0.07198	-0.0861358	0.0119503	-0.0809928	0.247519	0.11222	-0.130093	-0.201559	-0.25055	-0.368359	-0.056098	0.0128965	-0.0746964	-0.0510322	-0.163897	0.155747	-0.0904993	-0.344407	-0.207218	-0.386467	0.00213615	-0.00296214	0.205872
VIT_00s0362g00010	0.245932	0.0919043	-0.276783	0.0652988	-0.0136837	-0.363346	-0.341148	-0.279083	-0.105483	-0.295418	-0.611156	-0.519472	-0.101317	-0.145721	0.00808454	-0.278783	-0.112756	-0.236807	-0.326936	-0.484324	-0.605314	-0.389469	-0.567448	-0.116475	-0.274902	0.0992122	-0.0775996	-0.109106	-0.284567	-0.361172	0.532806	0.15943	0.00840757	0.126118	-0.0276736	-0.335917	0.134718	0.352302	0.0808313	0.406413	0.176206	0.191602	-0.297595	-0.783526	-0.406175	-0.691381	0.236574	-0.0548759	0.33609
VIT_00s0366g00010	0.622304	0.399413	0.566166	0.497009	0.53014	0.593633	0.62605	0.754172	0.660412	0.733863	0.466054	0.467243	0.603107	0.551271	0.852756	0.748355	0.654275	0.737137	0.0263133	0.298078	0.480824	0.180889	-0.132401	0.0201069	-0.254895	-0.0200768	-0.122508	-0.0238413	0.396469	-0.352224	-0.577061	-0.609394	-0.345903	-0.462341	-0.580668	-0.55981	-0.778354	-0.548085	-0.662991	-0.665279	-0.716273	-0.379352	-0.283805	-0.0391426	-0.628763	-0.36785	-0.11751	-0.0552723	0.205762
VIT_00s0366g00020	-0.00286089	0.0453938	-0.0290979	-0.0492526	-0.0237512	-0.265643	-0.216316	-0.52052	-0.0633531	-0.455395	-0.118213	0.139967	-0.11097	0.243768	-0.347849	-0.0940299	0.10821	-0.141401	-0.194208	-0.298579	-0.629241	-0.604855	-0.162365	-0.2648	0.351844	-0.141443	-0.0677917	-0.0484104	-0.560167	-0.139055	0.63933	0.708346	0.00833423	0.263751	-0.23407	-0.0204846	0.510243	0.269362	0.150905	0.14089	0.0612475	0.727538	0.519239	0.1847	0.624765	0.259702	0.0308428	-0.0885274	0.278646
VIT_00s0367g00010	0.60953	0.485682	0.208014	0.323602	0.207568	-0.053155	0.207713	0.082071	0.26259	0.0345232	0.108974	0.398607	0.304499	0.596441	0.362429	0.323221	0.539115	0.365877	-0.455709	-0.250577	-0.272019	-0.565058	-0.506856	-0.354117	-0.15713	-0.375593	0.107468	0.0719945	-0.0108585	-0.208299	0.0848091	-0.00548319	-0.428675	-0.114447	-0.642704	-0.633968	-0.0562558	-0.0265668	-0.404085	-0.246652	-0.415802	0.434124	0.348388	0.0102175	-0.0322979	-0.264181	-0.161685	-0.0433233	0.360962
VIT_00s0369g00050	-0.490244	-0.392763	-0.188211	-0.336423	-0.0811915	-0.137238	-0.303474	-0.365921	-0.150984	-0.220238	-0.15386	-0.320291	-0.198786	-0.34113	-0.448368	-0.28292	-0.350498	-0.343747	0.160928	-0.141793	-0.18233	0.203715	0.395547	0.214535	0.454093	0.53932	-0.10599	-0.0962134	-0.369945	-0.116084	0.357208	0.50215	0.250055	0.118137	0.378502	0.503044	0.181037	0.125364	0.364652	0.289984	0.352088	-0.0314853	-0.225677	-0.120367	0.27409	0.29927	0.328354	0.101307	0.0611133
VIT_00s0370g00010	0.131822	-0.135075	0.33052	0.00868711	0.558332	0.50608	0.534552	0.457958	0.660483	0.468077	0.457989	0.321543	0.336276	0.438194	0.321901	0.615463	0.363425	0.38686	0.201961	0.0364125	0.144946	0.252588	0.299566	0.429181	0.458448	0.529118	-0.115836	-0.236485	-0.165023	-0.37304	-0.0919607	0.176668	-0.157629	-0.458559	-0.364806	-0.118536	-0.544543	-0.616379	-0.256655	-0.451486	-0.550161	-0.218297	-0.332678	-0.0333084	-0.074302	0.105283	-0.237528	0.220411	0.303734
VIT_00s0370g00020	0.348435	0.43107	0.628277	0.826147	-0.303888	-0.115592	0.327826	0.145172	0.125716	0.292277	0.182955	0.316777	0.276021	0.241082	0.373952	0.265767	0.385333	0.341251	-0.291029	0.227694	0.129901	-0.178239	-0.21763	-0.198044	-0.260731	-0.272827	-0.0757686	0.601137	0.467779	0.0149219	-0.18264	-0.33828	0.117447	0.41894	-0.409451	-0.333972	-0.107806	0.0119212	-0.356717	-0.356774	-0.125445	-0.114543	0.0358333	0.40395	-0.224422	-0.113739	0.112244	-0.209869	-0.271794
VIT_00s0370g00030	0.227459	-0.0628116	-0.23848	-0.0886215	0.0355626	-0.238658	0.00773073	-0.0547019	-0.0140008	-0.241291	-0.242539	-0.138777	-0.0546717	0.11045	-0.0413207	-0.0609276	-0.0331349	-0.12695	-0.35747	-0.272421	-0.431901	-0.397702	-0.417583	0.11429	-0.132993	-0.179666	0.314015	0.0309345	-0.148684	0.0671262	0.348441	0.188116	-0.0235173	-0.00882029	-0.113623	-0.332884	0.149229	0.0633026	0.130368	0.200054	-0.0337516	0.366029	0.115189	-0.281676	-0.0334678	-0.321456	-0.18981	0.0290439	0.216615
VIT_00s0370g00040	-0.340862	-0.202231	-0.0483513	-0.364367	0.310038	0.510657	0.087838	0.0653044	0.10927	0.0404334	0.156951	0.0756561	-0.0810173	-0.075379	-0.121012	0.155423	-0.0150545	0.0775346	0.767049	0.258482	0.230169	0.368515	0.464171	0.256091	0.379325	0.256319	-0.430647	-0.577938	-0.398049	-0.198742	-0.111875	0.160614	0.0700751	-0.198917	0.145817	0.416232	-0.0541047	-0.132398	0.0310637	-0.0939184	-0.109559	-0.105325	-0.0220845	0.137624	0.277053	0.428606	0.00113459	0.0637741	-0.0143296
VIT_00s0370g00050	0.535431	0.30094	0.333591	0.181634	0.805892	0.751282	0.539334	0.715217	0.712179	0.621055	0.385243	0.392313	0.477124	0.543379	0.76432	0.736282	0.605247	0.662506	0.25175	0.0822506	0.357016	0.209128	-0.0704165	0.0599757	-0.0842378	0.1281	-0.351613	-0.531901	0.0272966	-0.560637	-0.45586	-0.407141	-0.456337	-0.689363	-0.542392	-0.48344	-0.746948	-0.551968	-0.599621	-0.563649	-0.771065	-0.299468	-0.291981	-0.240052	-0.525493	-0.315365	-0.192536	0.0701907	0.41709
VIT_00s0370g00060	0.32609	0.250827	-0.3204	0.181743	-0.304037	-0.649649	-0.427332	-0.486836	-0.420906	-0.657987	-0.6406	-0.308813	-0.284508	-0.0588032	-0.183107	-0.467445	-0.115863	-0.300845	-0.479269	-0.509389	-0.630606	-0.754961	-0.752527	-0.465895	-0.498066	-0.59619	0.1499	0.140101	-0.251343	-0.128611	0.497526	0.110756	-0.0272316	0.470772	-0.0847832	-0.363829	0.568085	0.618304	0.173823	0.51607	0.320299	0.668252	0.441517	-0.258354	0.0281546	-0.45014	0.145222	-0.302045	0.250938
VIT_00s0370g00070	0.298833	0.147681	0.0253288	0.227774	0.0936074	0.204651	0.153828	0.525403	0.0969651	0.334892	-0.0941226	-0.161784	0.133945	-0.156173	0.491301	0.0826224	0.00757873	0.19088	0.0334946	0.19459	0.517666	0.327198	-0.238422	0.017831	-0.722507	-0.273572	-0.0744111	-0.0716061	0.460017	-0.0434523	-0.62332	-0.882948	-0.0318831	-0.162338	0.0521733	-0.277072	-0.424074	-0.123814	-0.195708	-0.0986113	-0.124112	-0.492991	-0.29738	-0.288682	-0.762803	-0.550548	-0.0576003	-0.0292765	-0.0907806
VIT_00s0370g00090	-0.22751	-0.150847	0.167267	0.231522	-0.281766	-0.0809338	-0.119164	-0.0327791	0.0197385	0.128279	-0.298003	-0.404541	-0.0785347	-0.472534	0.00194163	-0.171621	-0.223289	-0.174363	0.0127796	0.234247	0.077689	0.288805	0.0325421	0.200743	-0.22039	0.2003	-0.44545	0.0587556	0.0885884	-0.0479623	-0.0127881	-0.195223	0.586327	0.361	0.265488	0.187559	-0.0452991	0.107906	0.195367	0.0649423	0.275816	-0.429839	-0.491218	-0.247159	-0.393981	-0.238677	0.24474	0.00603846	-0.277579
VIT_00s0371g00050	-0.463055	-0.135579	0.27258	-0.161481	-0.11701	0.137094	0.130588	-0.069726	0.0991962	0.260533	0.514414	0.347657	0.131778	0.0727075	-0.183986	0.198232	0.0888294	0.0977096	0.164835	0.281482	0.14003	0.302249	0.664797	0.211905	0.771894	0.545748	-9.06402e-06	0.188327	0.0448214	0.295286	0.0543088	0.426988	0.131557	-0.0606883	0.0519257	0.457276	-0.064076	-0.220535	-0.0503538	-0.326937	-0.0593964	-0.213501	-0.151926	0.460709	0.435698	0.660513	0.0799307	0.20046	-0.370974
VIT_00s0371g00100	-0.80269	-0.537429	-0.49818	-0.466683	-0.554939	-0.389601	-0.550469	-0.514875	-0.542254	-0.355624	-0.498848	-0.74888	-0.603448	-0.874457	-0.683052	-0.722477	-0.812431	-0.758997	0.161054	0.00778175	-0.212358	0.311598	0.312004	0.326496	0.148064	0.4447	-0.029962	0.0289508	-0.0533319	0.439665	0.378146	0.317035	0.624909	0.34045	0.86376	0.703887	0.436272	0.407674	0.702926	0.606593	0.793902	-0.273175	-0.413144	-0.297029	0.0875393	0.110998	0.300498	0.0330827	-0.490472
VIT_00s0372g00010	-0.115094	-0.0366448	0.546428	0.194334	0.0198726	0.173394	0.303494	0.0197776	0.341415	0.206442	0.573333	0.628432	0.262226	0.412331	-0.0536341	0.375139	0.337322	0.237914	0.0184082	0.2741	0.118628	-0.0072776	0.398296	-0.00441958	0.560501	0.0178016	-0.130357	0.174224	-0.0980385	0.0703257	-0.0220097	0.334033	0.104462	0.119682	-0.335229	0.155529	0.00932002	-0.317488	-0.0845423	-0.475185	-0.260095	0.142803	0.363353	0.763276	0.595049	0.690877	-0.274027	-0.0319963	-0.0930882
VIT_00s0372g00040	0.150173	0.0712752	-0.0837899	-0.00841204	0.0793102	-0.0754178	-0.0324937	-0.198029	-0.122595	-0.322125	-0.122757	0.070107	0.0474219	0.171694	-0.109843	-0.00949242	0.088865	-0.00131487	-0.0677058	-0.250831	-0.302144	-0.423113	-0.22688	-0.0911529	0.031703	-0.281099	0.0324216	-0.0211487	-0.26817	-0.137621	0.283631	0.252567	-0.12793	0.118237	-0.15947	-0.138446	0.276211	0.171416	0.0102239	0.118999	-0.0163633	0.506664	0.40141	0.13527	0.276294	0.0489349	-0.0340729	-0.11959	0.264617
VIT_00s0372g00070	0.16326	0.0888736	-0.0179134	0.0385894	0.0448363	-0.129106	0.0270668	-0.206262	-0.0932178	-0.313564	-0.0927249	0.11477	0.0658939	0.211819	-0.113931	0.025098	0.131051	0.0261608	-0.156548	-0.254599	-0.320391	-0.46208	-0.220385	-0.0468605	0.0680261	-0.285641	0.0285394	0.0324523	-0.293121	-0.146575	0.308151	0.293875	-0.0985584	0.171671	-0.211282	-0.153546	0.28239	0.165482	-0.0096991	0.0774997	-0.0411199	0.536296	0.425821	0.187823	0.317176	0.08328	1.27453e-05	-0.0342006	0.278237
VIT_00s0373g00010	-0.414875	-0.166419	-0.566151	-0.240804	-0.630099	-0.653926	-0.628001	-0.798578	-0.833172	-0.860897	-0.72241	-0.572473	-0.70134	-0.621599	-0.766024	-0.822031	-0.629913	-0.705813	-0.0350615	-0.206495	-0.537323	-0.413278	-0.216334	-0.137791	-0.201984	-0.362152	0.0623807	0.147561	-0.242802	0.325451	0.558236	0.367058	0.374931	0.689831	0.562758	0.383503	0.938154	0.829852	0.634007	0.795063	0.836844	0.522493	0.433703	0.0303926	0.465226	0.10917	0.272127	-0.127432	-0.221358
VIT_00s0373g00020	-0.400443	-0.240016	-0.214136	-0.068307	-0.413523	-0.340346	-0.305822	-0.412449	-0.295315	-0.359094	-0.53403	-0.545558	-0.443458	-0.574713	-0.396981	-0.455146	-0.426191	-0.460122	0.0529311	-0.0209812	-0.261146	0.0304684	-0.00637853	0.19296	-0.0886099	0.066431	-0.324787	-0.0672762	-0.261906	0.0147445	0.311635	0.165	0.576959	0.519524	0.401946	0.325971	0.397545	0.427771	0.431641	0.403531	0.501591	-0.0169196	-0.138557	-0.185819	0.0281463	-0.0267669	0.268242	-0.0812552	-0.204591
VIT_00s0373g00030	-0.380719	0.02083	-0.296054	-0.0664244	-0.509169	-0.422553	-0.566557	-0.656833	-0.516087	-0.491568	-0.660882	-0.550864	-0.546342	-0.610799	-0.444903	-0.584653	-0.376113	-0.473084	0.0749524	-0.0292356	-0.467512	-0.191422	-0.174662	-0.116761	-0.135719	-0.0407754	-0.434916	-0.124427	-0.281936	0.0940082	0.508049	0.248142	0.535702	0.604372	0.395728	0.303864	0.621051	0.748663	0.372117	0.513782	0.609904	0.135132	-0.0640687	-0.242407	0.0740047	-0.100525	0.529589	0.00390627	-0.323165
[truncated: 20,410 more rows]
[truncated: 92 more columns]
